# Supplementary material for: Environmental Stresses Disrupt Telomere Length Homeostasis
Source: PubMed Central journal article supplement (PMC3764183; doi:10.1371/journal.pgen.1003721), 2013-09-05

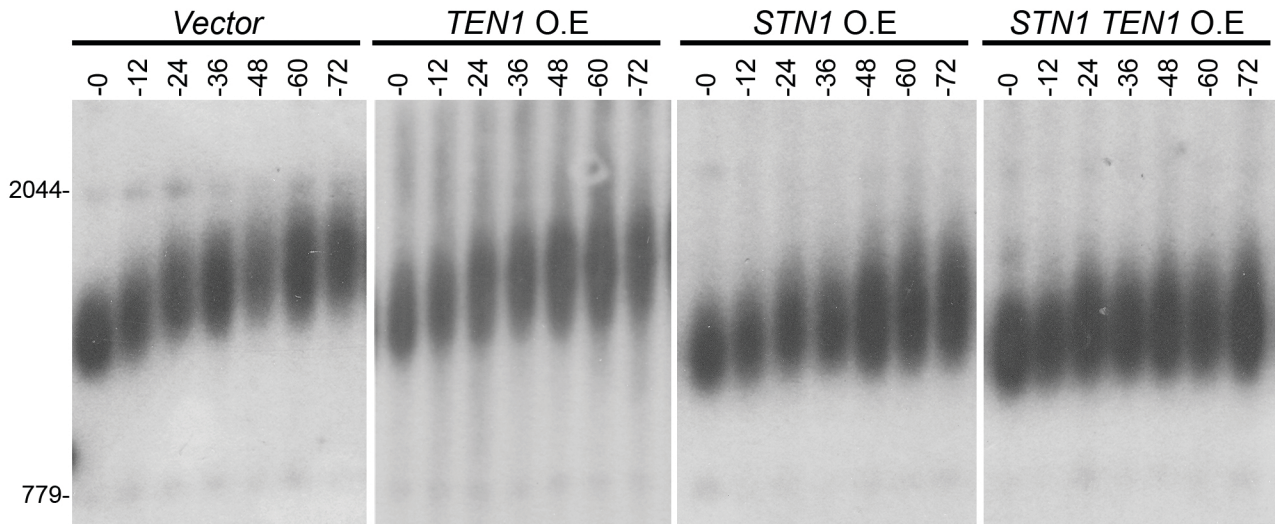

Supplement: pgen.1003721.s004.pdf [file pgen.1003721.s004.pdf]
