# Supplementary material for: Environmental Stresses Disrupt Telomere Length Homeostasis
Source: PubMed Central journal article supplement (PMC3764183; doi:10.1371/journal.pgen.1003721), 2013-09-05
Supplement: pgen.1003721.s007.pdf [file pgen.1003721.s007.pdf]

| THANOL                | CAFFEINE             | 37C                   | H2O2                 |
|-----------------------|----------------------|-----------------------|----------------------|
| YDR3(ARO1(35.3 11.1   | YJR15 DAN( 23.9 23.5 | YFL01 HSP1( 37.1 23.8 | YEL03 CYC 25.6 5.6   |
| YIL01( - 29.7 4.6     | YPR0( PDH1 20.0 5.8  | YGR0( GSC( 27.6 5.4   | YHR2( --- 23.2 3.8   |
| YNR0( - 29.7 8.1      | YJR15 DAN1 19.9 56.4 | YNR0( - 24.6 4.6      | YNR0( --- 22.3 13.7  |
| YFL01 HSP1( 29.0 8.7  | YEL04 PAU( 18.9 9.3  | YGR0( NQM 20.3 8.0    | YDR5( FIT1 20.7 7.7  |
| YER1( SPI1 26.3 5.2   | YBR3( DAN( 17.2 13.1 | YGL12 GPG 20.0 11.1   | YKL16 PIR( 20.5 25.8 |
| YMR0( - 23.8 5.0      | YJL13( - 16.2 7.5    | YEL03 CYC( 19.9 4.5   | YFL01 HSP 20.2 14.9  |
| YBL02( - 22.9 4.2     | YHR2( CRG( 16.1 3.8  | YGR2( SOL( 19.4 13.3  | YLR14 PUT 20.1 4.3   |
| YHR0( RSC3( 22.6 3.0  | YKR0( SRL3 16.1 4.8  | YBR0( - 18.8 3.6      | YGR0( GSC 18.6 3.4   |
| YHR0( RSC3( 22.6 3.0  | YOR0( TIR4 16.0 6.7  | YER1( SPI1 18.0 7.0   | YFR0( --- 18.6 3.2   |
| YGR0( GSC2 21.2 4.1   | YBR0( - 14.6 3.9     | YNL16 YGP( 16.6 4.1   | YIL09( SGA 18.4 2.8  |
| YEL01 GLC3 20.2 3.7   | YMR3( - 14.1 14.2    | YJR07 BNA( 16.0 8.5   | YLR32 TMA 17.5 12.7  |
| YJL07( PRY1 19.6 4.6  | YIL011 TIR3 14.0 4.3 | YBR0( YRO( 15.3 5.3   | YOR3( FIT3 17.5 5.2  |
| YBR2( - 18.7 4.6      | YIR03( YPS( 14.0 2.5 | YAL00 SSA1 14.9 1.9   | YMR0( SYN 17.4 3.3   |
| YHR1( ARO9 18.6 4.8   | YFL02 PAU( 13.7 6.3  | YPL24 HSP( 14.8 2.5   | YOL0( DDR 16.9 17.0  |
| YDL07 MRK1 18.1 2.4   | YDR5( FIT1 13.5 8.6  | YDR3( ARO( 14.8 3.9   | YBR0( --- 16.8 2.9   |
| YKL10 HAP4 18.1 4.0   | YGR0( GSC( 13.4 3.3  | YDR0( - 14.6 5.6      | YDR0( --- 16.6 9.3   |
| YDR5( APA2 18.1 2.1   | YEL07 DLD( 13.4 2.7  | YHR0( RSC( 14.3 2.7   | YFL05 --- 16.5 1.6   |
| YJL04( UBX6 18.1 2.8  | YMR1( CMC 13.0 2.5   | YHR0( RSC( 14.3 2.7   | YEL01 GLC 16.5 2.6   |
| YGL12 GPG1 17.8 7.9   | YLR05 OSW 12.4 3.3   | YOR3( ALD4 13.9 2.9   | YGL12 GPG 16.4 6.7   |
| YGR2( SOL4 17.5 4.0   | YOR3( FIT2 12.4 5.9  | YLR03( - 13.3 3.3     | YIR03( YPS 15.8 2.5  |
| YNL16 YGP1 16.5 3.9   | YGL12 GPG( 12.3 5.4  | YMR1( - 13.2 4.1      | YBR0( --- 15.6 3.2   |
| YCR0( HSP3( 16.4 8.8  | YOR3( FIT3 11.9 4.9  | YEL05( - 12.9 2.2     | YEL06 PRB 15.4 2.7   |
| YFR01 IGD1 16.1 2.7   | YGL15 AMS( 11.8 3.9  | YLL02 HSP1 12.4 2.4   | YOR1( GCY 14.8 3.0   |
| YLR34 DIC1 15.7 4.1   | YAL06 BDH1 11.7 2.5  | YER0( PHM( 12.4 3.3   | YPR0( PDH 14.5 1.7   |
| YEL03 CYC7 14.9 2.7   | YIL17( FSP2 11.6 2.6 | YBR11 RAD( 11.9 2.4   | YBL07 ATG 14.4 2.8   |
| YOR2( - 14.6 4.6      | YJL22 FSP2 11.6 2.6  | YJL03( LOH1 11.7 5.3  | YGR1( --- 14.1 2.0   |
| YGL15 AMS1 14.5 3.8   | YOL15 FSP2 11.6 2.6  | YOL05 DDR( 11.3 8.3   | YOR3( FIT2 14.0 4.8  |
| YDR0( NRG1 14.3 3.2   | YMR1( ADE1 11.6 3.5  | YJR00 MHO 11.3 2.4    | YJR00 --- 13.9 2.2   |
| YOR1( DCS2 14.3 3.7   | YGR2( SOL4 11.6 2.8  | YOR1( DCS( 11.1 3.9   | YDL08 NDE 13.8 2.1   |
| YHR0( SOD2 14.3 2.2   | YFL02 PAU( 11.3 3.9  | YAL06 BDH( 11.0 1.9   | YGR2( SOL 13.8 5.9   |
| YER0( PIC2 14.3 6.7   | YKR0( YSR( 11.0 5.3  | YLR17 TFS1 10.9 6.2   | YGL15 AMS 13.5 4.3   |
| YNL14( - 14.1 2.3     | YAR01 ADE1 10.7 2.2  | YML12 MSC 10.8 4.7    | YFL02 PAU 13.3 2.7   |
| YDL04 STP4 13.9 3.5   | YMR0( SNZ1 10.5 2.8  | YBR1( VID2 10.8 2.6   | YHR1( --- 13.3 2.6   |
| YER1( - 13.8 3.4      | YGL0( PYC1 10.4 3.3  | YMR1( PAI3 10.8 3.2   | YLR20 HMX 12.7 4.3   |
| YDL18 INH1 13.8 4.1   | YDR0( - 10.4 4.2     | YDR21 ADR( 10.8 2.6   | YHR0( PCL( 12.7 2.0  |
| YDR0( MIC14 13.7 2.2  | YML11 NGL( 10.2 2.3  | YGR1( TPO( 10.7 7.1   | YMR1( --- 12.6 3.2   |
| YJR07 BNA2 13.5 5.2   | YJR10 CPA( 10.2 2.4  | YMR2( - 10.7 2.0      | YER1( --- 12.3 1.8   |
| YMR1( ICY1 13.5 3.1   | YDR4( DIT1 9.9 2.6   | YLL01( KNS1 10.7 2.4  | YDR2( DIN7 12.0 1.6  |
| YLR25 GSY2 13.5 4.2   | YLR26 BOP( 9.9 4.3   | YER1( SSA( 10.5 2.9   | YLR26 --- 12.0 3.8   |
| YOR0( HMS1 13.2 7.4   | YCL03 HIS4 9.7 2.1   | YCR0( HSP( 10.5 10.5  | YCL02 --- 11.8 2.9   |
| YER0( PHM8 13.2 3.4   | YLR23 THI7 9.7 2.2   | YLR32 TMA( 10.5 6.4   | YPL01 --- 11.8 2.1   |
| YKL04 PHD1 13.1 2.7   | YER0( ERG( 9.6 2.6   | YLR03( - 10.4 2.9     | YFL05 AAD 11.6 3.8   |
| YPR1( GPH1 13.1 12.1  | YCR0( SSK2 9.6 2.5   | YPR1( GPH( 10.4 9.3   | YKL08 SRX 11.6 7.2   |
| YJL13( - 13.1 3.6     | YEL06 PRB1 9.6 2.7   | YDR0( PST1 10.4 2.2   | YMR0( SNO 11.5 3.4   |
| YNL27( - 13.0 6.1     | YPL08( - 9.5 3.2     | YGL17 SPO( 10.3 3.5   | YPR1( GDB 11.3 2.4   |
| YJR12 RSF2 12.9 3.0   | YJL16 FMP( 9.5 5.0   | YIR02( DAL1 10.2 2.0  | YJL08( ARG 11.2 1.9  |
| YJR00 MHO1 12.5 2.3   | YCR0( CIT2 9.4 4.1   | YNL27( - 10.2 5.9     | YPL18 UIP4 11.1 2.7  |
| YHR0( QCR1( 12.5 2.2  | YPL01 IRC1( 9.4 2.6  | YLR05 OSW 10.1 2.4    | YHL04 ARN 11.1 4.3   |
| YGL11( - 12.3 2.9     | YGR0( MTL1 9.4 2.0   | YOR1( GCY( 10.0 1.9   | YJL14 --- 11.0 3.2   |
| YDR3( HXT7 12.3 8.0   | YDR4( TSA2 9.3 7.9   | YHR1( ARO( 9.9 2.3    | YKR0( SRL( 10.9 2.0  |
| YDR3( HXT6 12.3 8.0   | YIR03( DAL3 9.2 3.0  | YAL06 GDH( 9.9 2.0    | YJL13( --- 10.9 2.7  |
| YHR0( FSH1 12.2 2.0   | YKL16 KDX1 9.1 6.6   | YDR0( NTH1 9.9 2.7    | YJL15( INO1 10.8 3.0 |
| YNL12 ESBP( 12.1 2.8  | YGR2( RTA1 9.1 5.3   | YKL16 PIR3 9.9 4.8    | YDL24 THI1 10.8 2.1  |
| YMR1( - 12.0 3.7      | YOR1( SIA1 9.1 1.9   | YPL01 IRC1( 9.9 2.3   | YFL05 THI5 10.8 2.1  |
| YKL16 PIR3 11.5 5.8   | YIL11( HIS5 9.1 2.0  | YML1( TSL1 9.9 7.8    | YJR15 THI1 10.8 2.1  |
| YKL06 MSN4 11.4 3.5   | YMR1( RGM 9.0 2.0    | YDR2( HSP7 9.6 3.2    | YNL33 THI1 10.8 2.1  |
| YKL08 SRX1 11.4 3.4   | YMR1( YPK2 8.9 2.1   | YEL06 PRB1 9.6 2.6    | YCR0( HSP 10.8 8.4   |
| YLR32 TMA1( 11.4 5.6  | YMR0( SNO( 8.9 3.9   | YMR0( - 9.5 2.4       | YKL10 --- 10.7 2.5   |
| YBL07 ATG8 11.4 2.2   | YGL11( - 8.8 2.5     | YGL15 AMS( 9.5 2.4    | YML0( HUG 10.6 17.4  |
| YOR0( - 11.3 1.9      | YHR0( DOG 8.8 1.9    | YLR25 GSY( 9.3 3.2    | YHR0( SOD 10.6 1.8   |
| YLR24 ERF2 11.2 1.6   | YDR0( PST1 8.7 1.8   | YHR1( - 9.3 2.2       | YLR14 --- 10.5 3.5   |
| YLR29( - 11.1 3.2     | YDL24 THI1( 8.7 2.3  | YJL03( IRC1 9.3 3.5   | YGR1( --- 10.4 2.2   |
| YOR3( ALD4 11.1 2.2   | YFL05 THI5 8.7 2.3   | YHR2( CRG 9.3 1.7     | YJR10 CPA 10.4 1.8   |
| YOR2( AIM41 10.9 1.8  | YJR15 THI1( 8.7 2.3  | YDL22 FMP( 9.2 3.1    | YJL16 --- 10.4 4.1   |
| YML0( - 10.8 1.8      | YNL33 THI1( 8.7 2.3  | YMR3( ADH( 9.1 1.9    | YLL02 HSP 10.4 1.9   |
| YGR1( TPO2 10.8 4.8   | YOR3( - 8.6 2.2      | YOR0( - 9.1 1.8       | YDR5( GRX 10.3 1.5   |
| YBR0( REG2 10.7 2.7   | YPL27( - 8.6 2.2     | YGR0( MTL1 9.1 2.8    | YDR4( DIT1 10.2 2.2  |
| YBR0( TIP1 10.6 1.6   | YER01 TIR1 8.6 3.2   | YJL16 FMP( 9.1 4.2    | YAL06 BDH 10.2 1.6   |
| YIL107 PFK26 10.6 2.4 | YLL05( - 8.6 2.3     | YGR2( GND( 9.0 2.9    | YNL16 YGP 10.2 2.8   |

|             |      |     |             |     |     |            |     |      |            |      |      |
|-------------|------|-----|-------------|-----|-----|------------|-----|------|------------|------|------|
| YHR07 PCL5  | 10.5 | 1.9 | YMR21 GTO   | 8.5 | 2.9 | YPR1E GDB  | 9.0 | 2.3  | YHL02 RIM  | 10.2 | 3.0  |
| YLL01 KNS1  | 10.3 | 2.4 | YNR0C CIT1  | 8.5 | 2.5 | YFR01 -    | 9.0 | 2.6  | YER0E SER  | 10.1 | 2.0  |
| YKL15 MCR1  | 10.3 | 1.7 | YDR3E ARO   | 8.4 | 2.3 | YAR04 SWH  | 8.9 | 1.7  | YJL11 NCA  | 10.1 | 7.5  |
| YBR04 FMP2  | 10.3 | 2.5 | YBR0E -     | 8.4 | 1.9 | YOR2 HER   | 8.9 | 2.0  | YOR2 ISU2  | 10.1 | 1.8  |
| YDR0E TGL2  | 10.2 | 2.7 | YJR07 BNA   | 8.4 | 3.5 | YMR2 GAD   | 8.9 | 6.1  | YOR3 PUT   | 9.9  | 1.8  |
| YKR0E MTD1  | 10.1 | 1.8 | YOR1 ADE    | 8.4 | 1.9 | YBR2 THI2  | 8.8 | 1.8  | YER17 TMT  | 9.9  | 2.0  |
| YGL0E PKP2  | 10.1 | 1.8 | YAL06 GDH   | 8.3 | 2.2 | YDL12 -    | 8.8 | 1.7  | YOR1 DCS   | 9.9  | 3.1  |
| YDR2 MTH1   | 10.1 | 3.0 | YIR02 DAL1  | 8.2 | 2.2 | YGR0 ROM   | 8.7 | 2.3  | YJR00 ---  | 9.8  | 5.3  |
| YGL22 EDC1  | 10.1 | 2.2 | YLR14 -     | 8.2 | 3.2 | YAL05 FLC2 | 8.7 | 1.5  | YNL09 YPT  | 9.8  | 2.2  |
| YNL10 LEU4  | 10.0 | 1.8 | YHL04 ARN   | 8.2 | 4.4 | YLR29 -    | 8.7 | 2.8  | YJR07 BNA  | 9.8  | 3.0  |
| YKL08 MDH1  | 9.9  | 1.7 | YFL05 -     | 8.2 | 1.7 | YDL04 KNH  | 8.6 | 1.8  | YPR1E GPH  | 9.7  | 5.7  |
| YOL0E DDR2  | 9.9  | 5.3 | YMR3 ADE    | 8.2 | 1.9 | YBR2E -    | 8.6 | 2.6  | YGR1E RTS  | 9.7  | 3.1  |
| YJL16 FMP3  | 9.8  | 4.2 | YNL11 CYBE  | 8.1 | 1.7 | YDR07 FMP  | 8.6 | 3.3  | YLR19 ---  | 9.7  | 1.8  |
| YDR2 COX2   | 9.7  | 4.7 | YOR3E -     | 8.1 | 2.4 | YDR37 -    | 8.5 | 2.9  | YER0E PHM  | 9.6  | 2.4  |
| YLR08 ALT1  | 9.6  | 2.4 | YLR41 PUN1  | 8.1 | 1.9 | YCR0E TRX  | 8.5 | 1.7  | YMR0E ECM  | 9.6  | 1.4  |
| YLR14 -     | 9.5  | 3.4 | YNL01 SPO   | 8.1 | 2.2 | YJL04 -    | 8.4 | 2.4  | YCL03 ATG  | 9.5  | 1.6  |
| YOR3E FIT3  | 9.4  | 2.5 | YOL0E DDR   | 8.1 | 4.9 | YHR0E -    | 8.4 | 2.4  | YLR05 OSV  | 9.4  | 2.3  |
| YDR0 GCV1   | 9.4  | 4.5 | YER0E CEM   | 8.0 | 2.3 | YFR01 IGD1 | 8.4 | 2.9  | YKL07 ---  | 9.3  | 4.5  |
| YDL02 GPM2  | 9.4  | 8.9 | YBR1 YSW    | 8.0 | 2.7 | YGL0E PYC1 | 8.4 | 2.1  | YKR0 PET   | 9.3  | 2.8  |
| YIL11E RPI1 | 9.3  | 2.0 | YLR32 TMA1  | 7.9 | 4.1 | YLR14 -    | 8.3 | 3.6  | YDR2 ADR   | 9.3  | 2.1  |
| YER07 -     | 9.3  | 2.5 | YLL01 KNS1  | 7.9 | 2.3 | YMR0E -    | 8.3 | 1.9  | YMR2 GTO   | 9.3  | 2.8  |
| YLR34 GAS2  | 9.3  | 1.7 | YBL10 SRO   | 7.9 | 2.3 | YDL08 NDE  | 8.3 | 1.6  | YOR3 PDR   | 9.2  | 1.6  |
| YLR23 THI7  | 9.3  | 1.6 | YJL07 PRY1  | 7.9 | 2.2 | YJL14 -    | 8.2 | 1.9  | YDL24 AAD  | 9.1  | 2.5  |
| YMR0E SNO1  | 9.3  | 2.6 | YAL05 FLC2  | 7.8 | 1.9 | YPL22 FMP  | 8.1 | 1.9  | YFL05 AAD  | 9.1  | 2.5  |
| YDR1 SDH4   | 9.2  | 1.7 | YEL07 -     | 7.8 | 2.8 | YMR1 PGM   | 8.0 | 6.2  | YGR0 MTL   | 9.0  | 1.6  |
| YNL09 YPT53 | 9.2  | 2.6 | YPR01 -     | 7.8 | 1.9 | YLR36 GRX  | 7.9 | 1.8  | YLR41 ---  | 9.0  | 1.6  |
| YMR0E SNZ1  | 9.2  | 1.9 | YBL00 -     | 7.7 | 2.3 | YDL04 STP4 | 7.9 | 3.1  | --- ---    | 9.0  | 7.6  |
| YKR0E KTR2  | 9.2  | 1.8 | YBL00 -     | 7.7 | 2.3 | YDL24 THI1 | 7.9 | 1.8  | YOR0 ---   | 9.0  | 1.7  |
| YDR0 GAL3   | 9.2  | 1.8 | YDR17 -     | 7.7 | 2.3 | YFL05 THI5 | 7.9 | 1.8  | YDL16 UGX  | 8.9  | 3.4  |
| YKL17 MRPL  | 9.2  | 1.4 | YMR0 -      | 7.7 | 2.3 | YJR15 THI1 | 7.9 | 1.8  | YDL19 ---  | 8.9  | 1.5  |
| YKR07 ECM4  | 9.1  | 3.3 | YMR0 -      | 7.7 | 2.3 | YNL33 THI1 | 7.9 | 1.8  | YDR0E PST  | 8.9  | 1.5  |
| YER0E CEM1  | 9.1  | 2.0 | YNL28 -     | 7.7 | 2.3 | YAL03 CYC  | 7.9 | 1.9  | YLR17 IDP2 | 8.9  | 1.8  |
| YFL03 AGX1  | 9.1  | 1.8 | YNL28 -     | 7.7 | 2.3 | YBR1E SSE  | 7.8 | 2.5  | YOR3 COT   | 8.8  | 1.6  |
| YEL02 RIP1  | 9.0  | 1.8 | YNR0C ATO   | 7.7 | 3.0 | YLR21 CPR  | 7.8 | 1.5  | YLR03 SMF  | 8.8  | 1.6  |
| YML12 MSC1  | 9.0  | 2.5 | YMR1 PAI3   | 7.6 | 2.9 | YDL07 MRK  | 7.8 | 1.6  | YLR13 TIS1 | 8.7  | 3.5  |
| YGR1 CLB1   | 9.0  | 1.7 | YMR0 PLB2   | 7.6 | 2.1 | YJL13 -    | 7.8 | 2.3  | YFL02 PAU  | 8.6  | 2.1  |
| YPL22 FMP4  | 9.0  | 1.8 | YIL117 PRM  | 7.6 | 2.3 | YMR2 HOR   | 7.7 | 2.0  | YBR2 GPX   | 8.6  | 2.2  |
| YDR37 -     | 8.9  | 3.0 | YHR0 MSC    | 7.6 | 1.9 | YOR3 CPA1  | 7.7 | 1.8  | --- ---    | 8.6  | 6.6  |
| YBR0E YRO2  | 8.9  | 4.2 | YBR0E NRG   | 7.5 | 2.1 | YJL01 -    | 7.6 | 1.7  | YLR29 ECM  | 8.5  | 1.7  |
| YPR1E QCR2  | 8.9  | 1.8 | YER0E PHM   | 7.5 | 2.3 | YBR0E UGA  | 7.6 | 1.6  | YOR2 ---   | 8.5  | 1.5  |
| YOR1 SIA1   | 8.8  | 1.6 | YAR0E PAU7  | 7.4 | 2.7 | YNL27 GOR  | 7.6 | 2.7  | YDL11 TMA  | 8.5  | 2.4  |
| YKL10 LAP4  | 8.8  | 4.1 | YPR0C CIT3  | 7.3 | 1.9 | YDL02 GPM  | 7.6 | 6.4  | YOR2 ---   | 8.5  | 2.3  |
| YOL0E ATG1  | 8.8  | 2.1 | YOR2 PTP2   | 7.3 | 2.1 | YJL11 NCA  | 7.6 | 4.7  | YFL03 AGX  | 8.4  | 1.7  |
| YLL04 SDH2  | 8.8  | 1.8 | YCR0E KIN8  | 7.3 | 2.0 | YGL17 MPT  | 7.6 | 1.4  | YLR17 TFS  | 8.3  | 3.4  |
| YJR07 OPI3  | 8.7  | 3.3 | YJR15 AAD1  | 7.3 | 1.9 | YML11 NGL  | 7.5 | 1.5  | YNL23 YTP  | 8.3  | 2.0  |
| YOR0E -     | 8.7  | 1.4 | YGR0 NQM    | 7.2 | 2.4 | YAL05 ACS  | 7.5 | 2.2  | YDR4E TSA  | 8.3  | 5.4  |
| YGR1E QCR9  | 8.7  | 1.9 | YGR2 ADE    | 7.2 | 1.7 | YOR1 SIA1  | 7.5 | 1.4  | YBL00 ---  | 8.2  | 1.7  |
| YBR2 LDH1   | 8.7  | 1.7 | YBR1E SMP   | 7.2 | 1.9 | YOR2E -    | 7.5 | 2.3  | YBL00 ---  | 8.2  | 1.7  |
| YDL11 TMA17 | 8.7  | 2.5 | YGR0E SPR   | 7.2 | 3.3 | YKL10 LAP4 | 7.4 | 3.5  | YDR17 ---  | 8.2  | 1.7  |
| YKR01 -     | 8.7  | 2.0 | YKR0E MTD   | 7.2 | 1.7 | YLL03 UBI4 | 7.4 | 3.1  | YMR0 ---   | 8.2  | 1.7  |
| YDR2E -     | 8.6  | 1.4 | YPR0E GLN1  | 7.2 | 1.7 | YBR07 HSP  | 7.4 | 19.2 | YMR0 ---   | 8.2  | 1.7  |
| YKL01 ATP7  | 8.6  | 1.6 | YPL08 RLM1  | 7.1 | 1.8 | YJR09 -    | 7.4 | 2.3  | YNL28 ---  | 8.2  | 1.7  |
| YFL02 PAU5  | 8.6  | 2.1 | YHR0E SLT2  | 7.1 | 1.9 | YPR0C PDH  | 7.4 | 1.6  | YNL28 ---  | 8.2  | 1.7  |
| YMR2E HOR7  | 8.6  | 2.1 | YER0E MEI4  | 7.1 | 2.6 | YCR0E KIN8 | 7.4 | 1.7  | YDR17 HSP  | 8.2  | 3.9  |
| YDR0E -     | 8.6  | 2.6 | YFR01 IGD1  | 7.1 | 1.8 | YMR2 MRPI  | 7.4 | 1.6  | YBR2E ---  | 8.2  | 1.9  |
| YPL01 IRC15 | 8.6  | 2.0 | YFR01 -     | 7.0 | 1.7 | YBR2E OM1  | 7.3 | 2.0  | YDL12 ---  | 8.1  | 1.5  |
| YMR2E -     | 8.5  | 1.7 | YIL01E -    | 6.9 | 1.8 | YGL23 -    | 7.3 | 2.7  | YBL06 PRX  | 8.1  | 2.8  |
| YGR0E MTL1  | 8.5  | 1.6 | YOR0E TIR2  | 6.8 | 2.0 | YNL23 YTP1 | 7.3 | 2.1  | YBR0E UGA  | 8.1  | 1.5  |
| YJL05 TDH1  | 8.4  | 5.6 | YGR0E ERG   | 6.8 | 1.7 | YCL03 GRX  | 7.3 | 1.9  | YDR0E NTH  | 8.0  | 2.1  |
| YMR1 DDR4   | 8.4  | 2.3 | YOR2E -     | 6.8 | 2.6 | YEL04 PAU  | 7.2 | 1.8  | YIL107 PFK | 7.9  | 2.1  |
| YMR1 DDR4   | 8.4  | 2.3 | YKL16 PIR3  | 6.8 | 3.4 | YHR01 MIP6 | 7.2 | 1.9  | YDR2E HSP  | 7.9  | 2.5  |
| YNL17 MDG1  | 8.4  | 1.9 | YGR1E RTS   | 6.8 | 2.8 | YPR0E ATH1 | 7.2 | 2.2  | YLR22 ---  | 7.9  | 1.3  |
| YGR2E KEL2  | 8.4  | 1.6 | YHL04 ARN   | 6.7 | 3.1 | YER0E EDC  | 7.1 | 2.1  | YGR1E BTN  | 7.9  | 2.5  |
| YER1E SSA4  | 8.3  | 2.2 | YGR0E SCM   | 6.7 | 2.7 | YLL00 COX  | 7.1 | 2.7  | YOR2 PTP   | 7.8  | 1.8  |
| YMR1 MRPL   | 8.3  | 1.6 | YHR0E RSC   | 6.7 | 1.8 | YHR1E -    | 7.1 | 4.8  | YKL15 MCR  | 7.8  | 1.5  |
| YGL0E PYC1  | 8.3  | 2.0 | YHR0E RSC   | 6.7 | 1.8 | YDL11 TMA  | 7.1 | 2.1  | YIL06E RNR | 7.8  | 3.0  |
| YLR17 TFS1  | 8.3  | 3.5 | YOR3E -     | 6.7 | 2.1 | YBL06 PRX1 | 7.1 | 2.6  | YCR0E TRX  | 7.7  | 1.2  |
| YCL03 GRX1  | 8.3  | 1.9 | YPL27 -     | 6.7 | 2.1 | YDR07 TPS2 | 7.1 | 2.9  | YEL04 PAU  | 7.6  | 1.8  |
| YBL06 PRX1  | 8.2  | 2.9 | YIL107 PFK2 | 6.7 | 2.1 | YJR07 MOG  | 7.0 | 1.6  | YOL0E ARG  | 7.6  | 3.8  |
| YJR06 -     | 8.2  | 1.4 | YER1E -     | 6.6 | 1.8 | YPR0E SMK  | 7.0 | 1.6  | --- ---    | 7.5  | 16.0 |
| YAL02 FRT2  | 8.1  | 2.2 | YMR1E GCV   | 6.6 | 3.4 | YLR06 -    | 7.0 | 1.5  | YMR3 DIA1  | 7.5  | 1.4  |

|             |     |      |             |     |     |             |     |     |            |     |      |
|-------------|-----|------|-------------|-----|-----|-------------|-----|-----|------------|-----|------|
| YDL16 UGX2  | 8.1 | 3.0  | YNL29 RIM2  | 6.6 | 1.9 | YOR1€ GSP2  | 7.0 | 3.2 | YDR07 SED  | 7.5 | 1.4  |
| YJR15 DAN1  | 8.1 | 4.4  | YLL05 FRE€  | 6.6 | 1.7 | YDL16 UGX2  | 7.0 | 2.8 | YML11NGL   | 7.5 | 1.7  |
| YPR0€ -     | 8.1 | 2.4  | YGR1€ -     | 6.6 | 2.1 | YER0€ CEM   | 6.9 | 1.8 | YGR07 ROM  | 7.4 | 1.9  |
| YDR4€ DIT1  | 8.0 | 2.1  | YPR0€ -     | 6.5 | 2.4 | YHR1€ AIM4  | 6.9 | 1.5 | YDR3€ ---  | 7.4 | 1.5  |
| YNL27 GOR1  | 8.0 | 2.6  | YPL26 DIP5  | 6.5 | 2.3 | YJL15 SNA3  | 6.9 | 2.0 | YDR07 ---  | 7.4 | 5.7  |
| YDR0€ NTH1  | 8.0 | 2.1  | YLR20 HMX   | 6.5 | 2.4 | YNL01 PBI2  | 6.8 | 3.4 | YBR07 HSP  | 7.4 | 18.0 |
| YJR07 MOG1  | 8.0 | 2.0  | YHR1€ YAP1  | 6.5 | 1.9 | YLR17 IDP2  | 6.8 | 1.5 | YAL06 GDH  | 7.3 | 1.6  |
| YPR1€ GDB1  | 8.0 | 2.2  | YBL07 ATG€  | 6.5 | 1.9 | YKR04 FMP2  | 6.8 | 2.0 | YBL00 ---  | 7.3 | 1.5  |
| YKL19 MIA40 | 7.9 | 1.4  | YGL0€ ERG2  | 6.5 | 1.8 | YGR0€ STF2  | 6.8 | 3.3 | YBR01 ---  | 7.3 | 1.5  |
| YOR0€ IRC23 | 7.9 | 2.0  | YDR2€ YAP€  | 6.4 | 2.3 | YHR0€ RTC3  | 6.8 | 6.2 | YDR2€ ---  | 7.3 | 1.5  |
| YPR0€ -     | 7.9 | 2.0  | YAR0€ YAT1  | 6.4 | 2.7 | YFL02 PAU€  | 6.8 | 1.8 | YER1€ ---  | 7.3 | 1.5  |
| YNR0€ CIT1  | 7.9 | 2.1  | YLR35 ADE1  | 6.4 | 1.6 | YOR0€ HSP1  | 6.7 | 1.5 | YGR0€ ---  | 7.3 | 1.5  |
| YBR1€ VID24 | 7.9 | 1.8  | YHL00 -     | 6.4 | 4.2 | YIR03€ DAL3 | 6.7 | 2.0 | YGR1€ ---  | 7.3 | 1.5  |
| YOR17 GAC1  | 7.9 | 3.5  | YJL11 -     | 6.4 | 4.2 | YER0€ PIC2  | 6.7 | 2.6 | YJR02 ---  | 7.3 | 1.5  |
| YPL17 OYE3  | 7.9 | 3.2  | YOR27 HER1  | 6.3 | 1.8 | YHR0€ KSP1  | 6.7 | 1.4 | YLR03 ---  | 7.3 | 1.5  |
| YML11NGL3   | 7.8 | 1.6  | YHR1€ -     | 6.3 | 1.9 | YGR2€ -     | 6.6 | 1.7 | YMR0€ ---  | 7.3 | 1.5  |
| YLL06 GTT2  | 7.8 | 3.6  | YNL14 MEP2  | 6.3 | 2.6 | YOR3€ PYK2  | 6.6 | 1.7 | YMR0€ ---  | 7.3 | 1.5  |
| YGR17 -     | 7.8 | 1.8  | YEL03 CYC7  | 6.3 | 1.9 | YGR2€ PEX2  | 6.6 | 1.6 | YNL28 ---  | 7.3 | 1.5  |
| YLR17 -     | 7.7 | 1.9  | YGL2€ ADE€  | 6.3 | 1.6 | YLR34 GAS2  | 6.6 | 1.8 | YOR1€ ---  | 7.3 | 1.5  |
| YKL15 RSM2  | 7.7 | 1.5  | YER0€ -     | 6.3 | 1.7 | YAL00 FUN1  | 6.6 | 1.7 | --- ---    | 7.3 | 7.3  |
| YBR2€ -     | 7.7 | 2.3  | YML12 MSC   | 6.3 | 2.2 | YJR10 URA€  | 6.6 | 1.5 | YPL08 ---  | 7.3 | 1.9  |
| YOL0€ DUF1  | 7.7 | 1.5  | YOR11 SER1  | 6.3 | 1.5 | YER04 MEI4  | 6.5 | 2.3 | YJL01 ---  | 7.3 | 1.5  |
| YLR43 ECM3€ | 7.6 | 1.4  | YLR05 ERG2  | 6.3 | 1.9 | YER0€ GIP2  | 6.5 | 2.3 | YER1€ SSA  | 7.3 | 3.3  |
| YLR27 -     | 7.6 | 1.4  | YLL05 AQY2  | 6.2 | 2.5 | YOR1€ IDH2  | 6.5 | 1.5 | YOR3€ ---  | 7.2 | 1.7  |
| YOR27 ISU2  | 7.6 | 1.5  | YOR3€ COT1  | 6.2 | 1.7 | YDR2€ COX2  | 6.5 | 1.5 | YPL27 ---  | 7.2 | 1.7  |
| YNL05 POR1  | 7.6 | 1.6  | YCR1€ AAD€  | 6.1 | 1.7 | YFL05 -     | 6.5 | 1.5 | YOR0€ ---  | 7.2 | 1.6  |
| YER0€ DOT6  | 7.6 | 1.9  | YDR27 AMD   | 6.1 | 1.8 | YIL12€ QDR  | 6.5 | 1.4 | YML12 MSC  | 7.1 | 4.2  |
| YOR3€ -     | 7.6 | 2.2  | YPL21 THI6  | 6.1 | 1.5 | YKR07 ECM   | 6.5 | 2.4 | YOR3€ ---  | 7.1 | 1.8  |
| YAL01 PSK1  | 7.6 | 1.7  | YLL02 HSP1  | 6.1 | 1.8 | YPL14 PPT2  | 6.5 | 2.0 | YIR03€ LYS | 7.1 | 1.5  |
| YJR05 PTK2  | 7.6 | 1.6  | YER02 YAT2  | 6.1 | 2.0 | YPR12 -     | 6.5 | 1.9 | YDR3€ TRR  | 7.0 | 1.3  |
| YJL13 AIM23 | 7.6 | 1.7  | YCR0€ ARE1  | 6.1 | 1.6 | YJL08 IML2  | 6.4 | 1.8 | YKR07 ECM  | 7.0 | 2.5  |
| YML0€ RPM2  | 7.6 | 2.0  | YBR2€ THI2  | 6.0 | 1.7 | YDR0€ GAL3  | 6.4 | 1.5 | YDL01 ---  | 7.0 | 1.3  |
| YNL01 PBI2  | 7.5 | 3.7  | YER0€ SER2  | 6.0 | 2.3 | YOR3€ FAA1  | 6.4 | 1.9 | YDR0€ AFR  | 7.0 | 1.8  |
| YER0€ ERG2€ | 7.5 | 1.7  | YCL03 ATG2  | 6.0 | 1.7 | YPL10 MSD   | 6.4 | 1.5 | YLR25 GSY  | 6.9 | 2.0  |
| YBR1€ SSE2  | 7.5 | 2.6  | YMR27 HOR   | 6.0 | 2.0 | YGL0€ -     | 6.4 | 2.2 | YIL13€ OM4 | 6.9 | 1.9  |
| YML11ATR1   | 7.5 | 1.5  | YGL2€ COS   | 6.0 | 2.2 | YJL05€ TDH1 | 6.4 | 3.9 | YGR2€ RTA  | 6.9 | 2.9  |
| YFL06 COS4  | 7.4 | 1.6  | YGL24 PDE1  | 6.0 | 1.8 | YHL02 RIM4  | 6.4 | 2.0 | YDR0€ NRG  | 6.9 | 1.9  |
| YGR2€ COS6  | 7.4 | 1.6  | YOR0€ AUS1  | 6.0 | 1.9 | YJR12 RSF2  | 6.4 | 2.0 | YMR0€ ---  | 6.9 | 2.3  |
| YNL33 COS1  | 7.4 | 1.6  | YLR25 HAP1  | 6.0 | 1.6 | YJL14 YAK1  | 6.4 | 1.6 | YNL27 ---  | 6.9 | 2.4  |
| YDL02 -     | 7.4 | 1.7  | YFR01 -     | 5.9 | 1.9 | YEL01 GLC3  | 6.4 | 2.1 | YNR0€ ATO  | 6.9 | 2.2  |
| YFL05 AAD6  | 7.4 | 1.5  | YJR00 MHO   | 5.9 | 1.6 | YDL18 INH1  | 6.3 | 2.2 | YOL11 ---  | 6.9 | 1.8  |
| YMR17 GCV2  | 7.4 | 3.3  | YKL21 SRY1  | 5.9 | 2.5 | YGL0€ MMS   | 6.3 | 1.7 | YKR0€ UBP  | 6.8 | 1.6  |
| YMR07 YTA12 | 7.4 | 1.3  | YOL11 MCH   | 5.9 | 2.1 | YMR1€ SPG€  | 6.3 | 1.7 | YLL01 KNS  | 6.8 | 1.9  |
| YBR07 HSP2€ | 7.4 | 18.1 | YIL08€ CAB2 | 5.9 | 1.9 | YFR05 HXK1  | 6.3 | 4.9 | YBR2€ ---  | 6.8 | 2.1  |
| YGR0€ NQM1  | 7.4 | 2.0  | YBR2€ DUR   | 5.9 | 1.9 | YEL06 HPA3  | 6.3 | 2.2 | YDR0€ UBC  | 6.7 | 1.6  |
| YBR0€ COQ1  | 7.4 | 1.3  | YLR30 ACO   | 5.9 | 1.8 | YDR21 AHA1  | 6.3 | 1.8 | YBL07 SSA  | 6.7 | 2.8  |
| YKR0€ -     | 7.4 | 1.3  | YMR27 TDA1  | 5.9 | 2.1 | YIL13€ OM4  | 6.3 | 1.7 | YMR1€ ---  | 6.7 | 1.9  |
| YCR0€ CIT2  | 7.3 | 2.6  | YDR3€ HXT3  | 5.8 | 1.5 | YDR4€ TSA2  | 6.3 | 3.6 | YGR2€ TRX  | 6.7 | 1.3  |
| YBR2€ -     | 7.3 | 1.8  | YKR0€ GAP1  | 5.8 | 3.0 | YKR04 PET1  | 6.3 | 2.4 | YKR01 ---  | 6.7 | 1.7  |
| YJL03 LOH1  | 7.3 | 2.6  | YOR0€ -     | 5.8 | 1.8 | YNR0€ -     | 6.2 | 2.0 | YOL15 HXT  | 6.7 | 1.9  |
| YBR1€ RTC2  | 7.3 | 5.6  | YDL13 STF1  | 5.8 | 3.2 | YDR07 PET1  | 6.2 | 1.8 | YMR2€ GAD  | 6.6 | 3.5  |
| YLR06 MEF1  | 7.3 | 1.4  | YDL02 GPM   | 5.8 | 4.5 | YLR29 ECM   | 6.2 | 1.6 | YOR0€ ---  | 6.6 | 1.6  |
| YOR3€ -     | 7.2 | 1.8  | YKR07 ECM   | 5.8 | 2.5 | YLR30 CDA   | 6.2 | 3.6 | YGR0€ ---  | 6.6 | 5.3  |
| YPL27 -     | 7.2 | 1.8  | YOR17 ERG   | 5.8 | 1.6 | YOR0€ RSB1  | 6.1 | 2.9 | YGR0€ STF  | 6.5 | 3.0  |
| YMR2€ COX7  | 7.2 | 1.7  | YIL01€ PDR1 | 5.8 | 1.6 | YJR07 OPI3  | 6.1 | 2.4 | YOR3€ ALD  | 6.5 | 1.6  |
| YEL07 -     | 7.2 | 2.1  | YKL10 LAP4  | 5.7 | 2.9 | YLR26 BOP2  | 6.1 | 1.9 | YBR1€ SSE  | 6.5 | 2.4  |
| YNL20 -     | 7.2 | 2.8  | YOR17 DCS2  | 5.7 | 2.0 | YHR1€ PEX1  | 6.1 | 1.9 | YGL17 SPO  | 6.5 | 1.8  |
| YMR1€ -     | 7.2 | 2.2  | YNL09 YPT5  | 5.7 | 2.0 | YER04 ERG2  | 6.1 | 1.6 | YMR1€ PGM  | 6.5 | 4.0  |
| YJL14 YAK1  | 7.2 | 1.6  | YER02€ KEL2 | 5.7 | 1.6 | YIL05€ VHR  | 6.1 | 1.3 | YER1€ MAC  | 6.4 | 1.4  |
| YDR07 SED1  | 7.2 | 1.5  | YGR0€ GIP2  | 5.7 | 2.2 | YPL18 UIP4  | 6.1 | 2.1 | YKL08 MDH  | 6.4 | 1.3  |
| YDL13 STF1  | 7.2 | 3.6  | YJL07 -     | 5.7 | 2.3 | YLR14 PUT1  | 6.0 | 1.5 | YOR3€ ---  | 6.4 | 1.6  |
| YFL01 -     | 7.2 | 1.7  | YLR14 PUT1  | 5.7 | 1.7 | YNR01 ARE2  | 6.0 | 2.0 | YPL27 ---  | 6.4 | 1.6  |
| YLL02 TPO1  | 7.1 | 1.6  | YER0€ IES5  | 5.7 | 1.8 | YCR0€ ARE1  | 6.0 | 1.5 | YBR2€ FTH  | 6.4 | 1.3  |
| YOR0€ CYT1  | 7.1 | 1.8  | YMR1€ SRT1  | 5.7 | 3.1 | YDL13 STF1  | 6.0 | 3.0 | YMR2€ HOR  | 6.3 | 1.7  |
| YAL00 FUN14 | 7.1 | 1.6  | YDL21 GDH   | 5.7 | 1.9 | YJL08€ SIP4 | 6.0 | 2.5 | YFL06 COS  | 6.3 | 1.4  |
| YKR0€ PET10 | 7.1 | 2.3  | YLR08 ALT1  | 5.7 | 1.7 | YDR12 SAC€  | 6.0 | 1.3 | YGR2€ COS  | 6.3 | 1.4  |
| YFR0€ HXK1  | 7.1 | 5.3  | YOR07 NRT1  | 5.6 | 1.6 | YNR0€ DSE2  | 6.0 | 1.7 | YNL33 COS  | 6.3 | 1.4  |
| YBR02 SCO2  | 7.1 | 1.7  | YJL03 LOH1  | 5.6 | 2.4 | YDR17 HSP2  | 6.0 | 3.2 | YMR1€ SRT  | 6.3 | 3.0  |
| YML0€ RCF1  | 7.0 | 1.5  | YDL04 KNH1  | 5.6 | 1.6 | YDR07 SED1  | 6.0 | 1.6 | YHR1€ PEX  | 6.3 | 1.8  |
| YPL18 UIP4  | 7.0 | 1.9  | YBL00 -     | 5.6 | 1.6 | YBR1€ AIM4  | 5.9 | 1.6 | YOR1€ PEX  | 6.2 | 1.5  |
| YMR2€ URA1€ | 7.0 | 1.8  | YBR01 -     | 5.6 | 1.6 | YKL17 STE3  | 5.9 | 2.5 | YGL0€ PMC  | 6.2 | 1.4  |

|               |     |     |             |     |     |              |     |     |             |     |     |
|---------------|-----|-----|-------------|-----|-----|--------------|-----|-----|-------------|-----|-----|
| YLR29-        | 7.0 | 1.6 | YDR2f-      | 5.6 | 1.6 | YPL08 RLM    | 5.9 | 1.4 | YHL03---    | 6.2 | 2.4 |
| YGR0 MSB2     | 7.0 | 1.7 | YER1f-      | 5.6 | 1.6 | YMR1f ALD3   | 5.9 | 1.5 | YLR12 YPS   | 6.2 | 1.8 |
| YDR4 JIP4     | 7.0 | 2.0 | YGR0f-      | 5.6 | 1.6 | YAL06 BDH    | 5.9 | 3.5 | YIR01 MET   | 6.2 | 1.8 |
| YJL01-        | 7.0 | 1.5 | YGR1f-      | 5.6 | 1.6 | YEL06 NPR    | 5.9 | 1.3 | YMR0 YET    | 6.2 | 1.8 |
| YGR0f MRP1    | 6.9 | 1.4 | YJR02-      | 5.6 | 1.6 | YOL11 RRI2   | 5.9 | 1.6 | YOL01 CMK   | 6.2 | 1.8 |
| YOR1f PET1    | 6.9 | 1.5 | YLR03-      | 5.6 | 1.6 | YJL04f UBX   | 5.9 | 1.5 | YER0f GIP2  | 6.2 | 2.2 |
| YDR0f RAD2f   | 6.9 | 1.5 | YMR0f-      | 5.6 | 1.6 | YHR1f GRE    | 5.9 | 2.3 | YGR2f GND   | 6.1 | 2.5 |
| YDR1f HSP4    | 6.9 | 3.3 | YMR0f-      | 5.6 | 1.6 | YMR1f-       | 5.9 | 1.9 | YNL20---    | 6.1 | 1.5 |
| YMR1f GID8    | 6.9 | 1.6 | YNL28-      | 5.6 | 1.6 | YKL15 MCR    | 5.9 | 1.5 | ---         | 6.1 | 9.2 |
| YML1f TSL1    | 6.9 | 4.2 | YOR1f-      | 5.6 | 1.6 | YOL0f ATG    | 5.8 | 2.2 | YGL11---    | 6.1 | 1.6 |
| YGL1f COX1f   | 6.9 | 1.6 | YAL06 PAU   | 5.6 | 1.9 | YMR2f TPS    | 5.8 | 1.6 | YJL03---    | 6.1 | 2.1 |
| YEL06 PRB1    | 6.9 | 2.2 | YBL10 PAU   | 5.6 | 1.9 | YBL05 CMC    | 5.8 | 1.8 | YJL02f RNR  | 6.1 | 1.6 |
| YFR01-        | 6.9 | 1.4 | YDR5f PAU1  | 5.6 | 1.9 | YER0f ZRG    | 5.8 | 2.3 | YBR0f---    | 6.1 | 1.6 |
| YNL23 YTP1    | 6.9 | 2.0 | YGL2f PAU1  | 5.6 | 1.9 | YER0f DOT    | 5.8 | 1.6 | ---         | 6.1 | 1.5 |
| YLL03 UBI4    | 6.9 | 2.8 | YGR2f PAU1  | 5.6 | 1.9 | YJL00f CYR   | 5.8 | 1.7 | YOR2f---    | 6.0 | 1.8 |
| YLR05-        | 6.9 | 2.3 | YHL04 PAU1  | 5.6 | 1.9 | YJL06f MPM   | 5.8 | 2.1 | YIL15f GUT  | 6.0 | 1.7 |
| YMR2f MRPL    | 6.9 | 1.4 | YBR0f FMP   | 5.6 | 1.8 | YCR07f IMG2  | 5.8 | 1.4 | YDR27f CCC  | 6.0 | 1.6 |
| YNL27 ALP1    | 6.8 | 2.3 | YNL14-      | 5.5 | 1.6 | YPL08 YDC    | 5.8 | 2.0 | YDR37---    | 6.0 | 1.9 |
| YGR1f TPO2    | 6.8 | 1.6 | YGL01 ERG   | 5.5 | 1.5 | YGR2f LSC2   | 5.8 | 1.7 | YAL00 SSA   | 6.0 | 1.2 |
| YPR1f TPO3    | 6.8 | 1.6 | YNR0f BIO3  | 5.5 | 1.4 | YNL17 MDG    | 5.7 | 1.7 | YPL24 HSP   | 6.0 | 1.4 |
| YJL06f MPM1   | 6.8 | 2.1 | YJL14-      | 5.5 | 1.5 | YEL05 SOM    | 5.7 | 2.6 | YBL00---    | 6.0 | 1.5 |
| YBR1f ATG1f   | 6.8 | 1.7 | YJL01-      | 5.5 | 1.5 | YDR5f ACN    | 5.7 | 1.8 | YDR2f---    | 6.0 | 1.5 |
| YLL02 HSP1f   | 6.8 | 1.9 | YHR07f ERG  | 5.5 | 1.7 | YDL20 RTN    | 5.7 | 2.0 | YDR3f---    | 6.0 | 1.5 |
| YPL06 LPE10   | 6.8 | 1.5 | YMR1f ICY1  | 5.5 | 1.9 | YIL107f PFK2 | 5.7 | 1.7 | YGR0f---    | 6.0 | 1.5 |
| YPL17 MRPL    | 6.8 | 1.6 | YDR0f NTH1  | 5.5 | 1.9 | YNL27 ALP1   | 5.7 | 2.1 | YJR02---    | 6.0 | 1.5 |
| YOR2f HER1    | 6.8 | 1.8 | YLR13 TIS1f | 5.4 | 2.6 | YDL18-       | 5.7 | 1.5 | YMR0f---    | 6.0 | 1.5 |
| YER01f AFG3   | 6.7 | 1.4 | YEL05 SOM   | 5.4 | 2.8 | YCL04 GLK1   | 5.6 | 3.0 | YNL28---    | 6.0 | 1.5 |
| YOR0f TCB1    | 6.7 | 1.7 | YIR03f LYS1 | 5.4 | 1.6 | YGL03f PNC   | 5.6 | 2.6 | YER0f ARG   | 6.0 | 1.4 |
| YDR5f HSP31   | 6.7 | 4.4 | YDR2f HSP7  | 5.4 | 2.2 | YNL06f AQR   | 5.6 | 2.4 | YHR0f SLT   | 6.0 | 1.4 |
| YJR09-        | 6.7 | 2.1 | YOR2f HES1  | 5.4 | 7.8 | YBL02f PIM1  | 5.6 | 1.3 | YER0f PIC2  | 6.0 | 2.2 |
| YDL14f ATG9   | 6.7 | 1.8 | YDL22f HBT1 | 5.4 | 1.8 | YIL014-      | 5.6 | 1.8 | YJR10f SOD  | 6.0 | 1.2 |
| YCR0f KIN82   | 6.7 | 1.9 | YOL01f CMK  | 5.4 | 2.0 | YML1f ERO    | 5.6 | 1.4 | YPL15f PEP  | 6.0 | 1.6 |
| YLR04-        | 6.7 | 1.9 | YDL03f GPR  | 5.4 | 1.5 | YPL13f GIP3  | 5.6 | 1.5 | YGR1f---    | 6.0 | 2.6 |
| YKL14f SDH1   | 6.6 | 1.8 | YEL01f GLC  | 5.3 | 1.7 | YNR01-       | 5.5 | 2.2 | YDL20f RTN  | 5.9 | 4.1 |
| YDL19f SNF3   | 6.6 | 1.7 | YER0f EDC   | 5.3 | 1.9 | YFL03f AGX   | 5.5 | 1.4 | YLL03f UBI4 | 5.9 | 2.4 |
| YJL04f MHP1   | 6.6 | 2.0 | YPR1f-      | 5.3 | 1.5 | YKL06f MSN   | 5.5 | 2.0 | YLR23f THI7 | 5.9 | 1.3 |
| YMR2f-        | 6.6 | 3.4 | YMR3f DIA1  | 5.3 | 1.6 | YLR24f CDD   | 5.5 | 1.6 | YDR5f PLM   | 5.9 | 1.7 |
| YHR1f NDT8f   | 6.6 | 1.7 | YCL04-      | 5.3 | 2.7 | YCR0f-       | 5.5 | 2.0 | YGL25---    | 5.9 | 1.7 |
| YOL0f AIM39   | 6.6 | 1.6 | YJR07f OPI3 | 5.2 | 2.4 | YDR0f SOK    | 5.5 | 1.4 | YOR0f CINE  | 5.9 | 1.5 |
| YOR3f FAA1    | 6.6 | 1.8 | YMR2f DFG   | 5.2 | 1.5 | YOR1f PET1   | 5.5 | 1.4 | YML1f TSL   | 5.8 | 3.3 |
| YCL03f ATG2   | 6.6 | 1.7 | YDR0f GCV   | 5.2 | 2.6 | YOR3f FIT2   | 5.4 | 2.3 | YHR0f---    | 5.8 | 6.0 |
| YLL05f YCT1   | 6.5 | 1.6 | YLR19-      | 5.2 | 1.5 | YOL02f IFM1  | 5.4 | 1.6 | YMR1f RGM   | 5.8 | 1.4 |
| YGR2f-        | 6.5 | 1.6 | YKL06f YET1 | 5.2 | 1.6 | YFL00f CDC   | 5.4 | 1.3 | YKR0f CCP   | 5.8 | 1.7 |
| YER0f RSM1f   | 6.5 | 1.4 | YDR37-      | 5.2 | 2.1 | YER1f-       | 5.4 | 1.8 | YJL07f PRY  | 5.8 | 1.5 |
| YHR0f CUP1-   | 6.5 | 1.5 | YDL20f MGT  | 5.2 | 1.5 | YBR02f ETR1  | 5.4 | 1.5 | YHL04f ARN  | 5.8 | 2.3 |
| YHR0f CUP1-   | 6.5 | 1.5 | YKR02f VPS  | 5.2 | 1.6 | YER0f HOR    | 5.4 | 3.0 | YHR0f CUP   | 5.8 | 1.3 |
| YEL05f SOM1   | 6.5 | 2.9 | YAL06-      | 5.2 | 2.1 | YHR11f SET1  | 5.4 | 1.3 | YHR0f CUP   | 5.8 | 1.3 |
| YDR4f PPN1    | 6.5 | 1.3 | YOR3f PYK2  | 5.1 | 1.7 | YER0f PET1   | 5.4 | 2.1 | YLR12f YPS  | 5.8 | 1.4 |
| YDL08f NDE2   | 6.5 | 1.6 | YDR07f SED1 | 5.1 | 1.5 | YJL02f BBC1  | 5.3 | 1.5 | YMR1f SPG   | 5.8 | 5.2 |
| YPR11-        | 6.5 | 1.5 | YOR1f GCV   | 5.1 | 1.5 | YDL04f MRP   | 5.3 | 1.3 | YKL06f YET  | 5.8 | 1.4 |
| YHR1f YAP1f   | 6.4 | 1.5 | YPR0f SUT2  | 5.1 | 1.4 | YOR3f-       | 5.3 | 1.7 | YJL05f TDH  | 5.8 | 3.2 |
| YGL0f PMC1    | 6.4 | 1.5 | YHL01f DUR  | 5.1 | 1.7 | YGL1f CUP    | 5.3 | 1.4 | YLR34---    | 5.8 | 1.6 |
| YFL03f RIM15  | 6.4 | 1.6 | YER01f HEM  | 5.1 | 1.9 | YGR1f TPO    | 5.3 | 1.9 | YAR01---    | 5.8 | 1.4 |
| YBR2f MAL3    | 6.4 | 1.8 | YDL02f RTK1 | 5.1 | 1.7 | YPR1f TPO    | 5.3 | 1.9 | YBR01---    | 5.8 | 1.4 |
| YDR0f FMP1f   | 6.4 | 2.2 | YML0f HUG   | 5.1 | 4.5 | YBL00f ECM   | 5.3 | 1.4 | YBR01---    | 5.8 | 1.4 |
| YBL09f BNA4   | 6.4 | 1.6 | YLR05f SHM  | 5.0 | 1.6 | YHR11f COX   | 5.3 | 1.8 | YDR0f---    | 5.8 | 1.4 |
| YPL27f ATP15  | 6.4 | 1.3 | YMR2f-      | 5.0 | 1.6 | YBL10f ECM   | 5.3 | 1.5 | YDR0f---    | 5.8 | 1.4 |
| YOR1f GSP2    | 6.4 | 2.8 | YOR1f CRC   | 5.0 | 3.7 | YBL07f KT11  | 5.3 | 1.4 | YDR21---    | 5.8 | 1.4 |
| YKR0f SRL3    | 6.4 | 1.6 | YCR0f-      | 5.0 | 2.1 | YFL03f RIM1  | 5.3 | 1.5 | YDR21---    | 5.8 | 1.4 |
| YBL03-        | 6.4 | 1.6 | YCR1f AAD   | 4.9 | 1.5 | YNL12f ESBF  | 5.3 | 1.7 | YDR2f---    | 5.8 | 1.4 |
| YER0f GPA2    | 6.4 | 1.6 | YOL1f AAD1  | 4.9 | 1.5 | YDR0f RAD    | 5.2 | 1.6 | YDR2f---    | 5.8 | 1.4 |
| YPR1f TAZ1    | 6.3 | 1.8 | YMR0f ECM   | 4.9 | 1.4 | YFL01f SMX   | 5.2 | 1.4 | YDR31---    | 5.8 | 1.4 |
| YGR1f PHB1    | 6.3 | 1.3 | YHR0f NCP1  | 4.9 | 1.5 | YKL12f MYO   | 5.2 | 1.6 | YDR31---    | 5.8 | 1.4 |
| YPR0f GLN1    | 6.3 | 1.3 | YGL2f CHC   | 4.9 | 1.6 | YIL101f XBP1 | 5.2 | 3.1 | YDR3f---    | 5.8 | 1.4 |
| YOL0f ATG3f   | 6.3 | 2.3 | YCR0f-      | 4.9 | 2.0 | YJL19f RPS1  | 5.2 | 1.3 | YDR3f---    | 5.8 | 1.4 |
| YJR08f AIM24  | 6.3 | 1.3 | YNL23f YTP1 | 4.9 | 1.8 | YDL22f HBT1  | 5.2 | 1.7 | YER1f---    | 5.8 | 1.4 |
| YER0f RGI1    | 6.3 | 7.2 | YML0f ERG   | 4.9 | 1.4 | YMR3f YME    | 5.2 | 1.4 | YER1f---    | 5.8 | 1.4 |
| YDL19-        | 6.3 | 1.5 | YDR0f GAL   | 4.9 | 1.7 | YER1f UBP    | 5.2 | 1.3 | YER1f---    | 5.8 | 1.4 |
| YIL111f COX5f | 6.3 | 3.6 | YGR1f ATF2  | 4.8 | 2.0 | YPL08-       | 5.2 | 1.7 | YER1f---    | 5.8 | 1.4 |
| YCL04-        | 6.3 | 2.8 | YLR05-      | 4.8 | 1.8 | YDL02f GPD   | 5.2 | 1.8 | YGR0f---    | 5.8 | 1.4 |
| YHR0f FVY4    | 6.3 | 1.6 | YHR0f ERG   | 4.8 | 1.5 | YER1f RPH    | 5.2 | 1.4 | YGR0f---    | 5.8 | 1.4 |

|              |     |     |              |     |     |              |     |     |             |     |     |
|--------------|-----|-----|--------------|-----|-----|--------------|-----|-----|-------------|-----|-----|
| YNL30 BXI1   | 6.3 | 2.0 | YDL24 AAD4   | 4.8 | 1.9 | YGL16 RAD5   | 5.2 | 1.4 | YGR0: ---   | 5.8 | 1.4 |
| YBR0: ATP3   | 6.2 | 1.5 | YEL05 PCM7   | 4.8 | 1.4 | YDR4: DIT1   | 5.2 | 1.6 | YGR0: ---   | 5.8 | 1.4 |
| YHR0: HXT4   | 6.2 | 5.7 | YNL09 APP1   | 4.8 | 1.5 | YCR07 SOL2   | 5.2 | 1.7 | YGR1: ---   | 5.8 | 1.4 |
| YER0: EDC2   | 6.2 | 1.8 | YJL08: SIP4  | 4.8 | 2.2 | YJR11 -      | 5.1 | 1.6 | YGR1: ---   | 5.8 | 1.4 |
| YLR32 -      | 6.2 | 1.3 | YGL2: -      | 4.8 | 1.8 | YHR1: YSP1   | 5.1 | 1.4 | YHR21 ---   | 5.8 | 1.4 |
| YGR1: XKS1   | 6.2 | 2.3 | YMR1: -      | 4.8 | 1.9 | YML0: MRPI   | 5.1 | 1.4 | YHR21 ---   | 5.8 | 1.4 |
| YPR0: JID1   | 6.2 | 1.6 | YNL29 MSB:3  | 4.8 | 1.5 | YGR0: UGA    | 5.1 | 2.1 | YJR02 ---   | 5.8 | 1.4 |
| YGR1: -      | 6.2 | 1.6 | YKL18 -      | 4.8 | 1.7 | YNL12 -      | 5.1 | 1.6 | YJR02 ---   | 5.8 | 1.4 |
| YLR29 ATP14  | 6.2 | 1.5 | YOL01 IRC1:1 | 4.8 | 2.4 | YLR37 STP3   | 5.1 | 1.4 | YJR02 ---   | 5.8 | 1.4 |
| YMR1: GAT2   | 6.2 | 1.8 | YLR12 YPS3   | 4.7 | 1.9 | YIL157 COA   | 5.1 | 1.5 | YJR02 ---   | 5.8 | 1.4 |
| YDL21 GDH2   | 6.2 | 1.8 | YHR0: STP2   | 4.7 | 1.4 | YER1: -      | 5.1 | 1.6 | YLR15 ---   | 5.8 | 1.4 |
| YHL03 GUT1   | 6.2 | 1.4 | YDR0: RAD2   | 4.7 | 1.4 | YDR1: STB3   | 5.1 | 1.4 | YLR15 ---   | 5.8 | 1.4 |
| YER01 TIR1   | 6.2 | 2.0 | YMR1: GYL1   | 4.7 | 1.6 | YPL24 GYP:1  | 5.1 | 1.4 | YLR22 ---   | 5.8 | 1.4 |
| YIL014 MNT3  | 6.2 | 1.5 | YHL01 -      | 4.7 | 2.0 | YDR2: SSD1   | 5.1 | 1.4 | YLR22 ---   | 5.8 | 1.4 |
| YMR1: PGM2   | 6.2 | 4.1 | YDL19 -      | 4.7 | 1.5 | YGR0: CTT1   | 5.1 | 2.3 | YLR25 ---   | 5.8 | 1.4 |
| YBL04 ECM1:1 | 6.1 | 2.6 | YNR0: -      | 4.7 | 1.8 | YGR1: UBR    | 5.1 | 1.3 | YML04 ---   | 5.8 | 1.4 |
| YER14 MAG1   | 6.1 | 1.4 | YPL22 FMP2   | 4.7 | 1.5 | YBR12 MRPI   | 5.1 | 1.4 | YML04 ---   | 5.8 | 1.4 |
| YPL24 HSP82  | 6.1 | 1.5 | YDR2: AKR1   | 4.7 | 1.5 | YLR06 MEF    | 5.1 | 1.3 | YML04 ---   | 5.8 | 1.4 |
| YFR01 -      | 6.1 | 1.8 | YGL0: PMC    | 4.7 | 1.5 | YNR0: CIT1   | 5.1 | 1.7 | YML0: ---   | 5.8 | 1.4 |
| YCL04 GLK1   | 6.1 | 3.2 | YPL19 -      | 4.7 | 1.5 | YHR0: TDA3   | 5.1 | 1.6 | YMR0: ---   | 5.8 | 1.4 |
| YMR1: RIM11  | 6.0 | 1.3 | YNL27 GOR    | 4.7 | 2.0 | YJL07 ARG:1  | 5.1 | 1.3 | YMR0: ---   | 5.8 | 1.4 |
| YGR2: LSC2   | 6.0 | 1.6 | YIL111 COX:1 | 4.6 | 3.0 | YCL04 POF1   | 5.1 | 1.6 | YNL05 ---   | 5.8 | 1.4 |
| YPL16 SET6   | 6.0 | 1.7 | YLL05 YCT1   | 4.6 | 1.6 | YLR25 HSP6   | 5.1 | 1.4 | YOL1: ---   | 5.8 | 1.4 |
| YDR0: UBC5   | 6.0 | 1.6 | YAR0: PRM:1  | 4.6 | 1.6 | YDL13 LYS2   | 5.0 | 1.3 | YOL1: ---   | 5.8 | 1.4 |
| YLL00 COX17  | 6.0 | 2.2 | YJL11: NCA:3 | 4.6 | 2.9 | YPR0: JID1   | 5.0 | 1.6 | YOR14 ---   | 5.8 | 1.4 |
| YLR39 COX8   | 6.0 | 1.4 | YPL27 -      | 4.6 | 8.0 | YNL09 YPT5   | 5.0 | 1.7 | YOR14 ---   | 5.8 | 1.4 |
| YDR2: DIN7   | 6.0 | 1.3 | YIR03: GTT1  | 4.6 | 2.1 | YKL09 CWP    | 5.0 | 2.8 | YPL25 ---   | 5.8 | 1.4 |
| YGR0: STF2   | 6.0 | 2.7 | YER07 -      | 4.5 | 1.8 | YIL09: SGA   | 5.0 | 1.8 | YPL25 ---   | 5.8 | 1.4 |
| YHR1: AIM18  | 6.0 | 1.9 | YMR0: FMS1   | 4.5 | 1.4 | YDL21 GDH:1  | 5.0 | 1.6 | YPR1: ---   | 5.8 | 1.4 |
| YMR1: RGM1   | 6.0 | 1.7 | YGR2: GND:1  | 4.5 | 1.8 | YJL05: IKS1  | 5.0 | 1.4 | YPR1: ---   | 5.8 | 1.4 |
| YLR34 -      | 5.9 | 1.8 | YPR14 ASN1   | 4.5 | 1.5 | YHL03 ECM:1  | 5.0 | 1.5 | YPR1: ---   | 5.8 | 1.4 |
| YDR5: QCR7   | 5.9 | 1.4 | YCL05 PRD1   | 4.5 | 1.5 | YER0: -      | 5.0 | 4.7 | YPR1: ---   | 5.8 | 1.4 |
| YML0: ATP18  | 5.9 | 1.4 | YDL16 UGX:2  | 4.5 | 2.1 | YOR2: HIS3   | 5.0 | 1.6 | YPR1: ---   | 5.8 | 1.4 |
| YOR1: IDH2   | 5.9 | 1.4 | YJL21: -     | 4.5 | 2.1 | YKL15 -      | 5.0 | 2.3 | YPR1: ---   | 5.8 | 1.4 |
| YER0: GIP2   | 5.9 | 1.9 | YDR0: NRG    | 4.5 | 1.6 | YFL01 MDJ1   | 5.0 | 1.3 | YOR1: GAC   | 5.8 | 2.5 |
| YMR1: ALD3   | 5.9 | 1.4 | YMR1: GID8   | 4.5 | 1.5 | YIL097 FYV1  | 5.0 | 1.7 | YOR3: PYK   | 5.7 | 1.5 |
| YMR1: PAI3   | 5.9 | 1.8 | YPR1: GDB    | 4.4 | 1.6 | YKL00 MRP    | 5.0 | 1.5 | YBL10 ---   | 5.7 | 1.4 |
| YOR3: -      | 5.8 | 1.8 | YKR01 -      | 4.4 | 1.6 | YGR0: FMP2   | 4.9 | 2.2 | YCL01 ---   | 5.7 | 1.4 |
| YOL11 -      | 5.8 | 1.6 | YKR0: UBP1   | 4.4 | 1.5 | YKL16 MRP:1  | 4.9 | 1.6 | YDR0: ---   | 5.7 | 1.4 |
| YPL15 PEP4   | 5.8 | 1.6 | YJL02: BBC1  | 4.4 | 1.6 | YBL07 NUP    | 4.9 | 1.3 | YDR0: ---   | 5.7 | 1.4 |
| YMR2: GAD1   | 5.8 | 3.1 | YBR0: QDR:1  | 4.4 | 1.4 | YMR3: UBP1   | 4.9 | 1.5 | YDR21 ---   | 5.7 | 1.4 |
| YPR0: CIT3   | 5.8 | 1.4 | YLR15 -      | 4.4 | 1.4 | YLR25 SYM:1  | 4.9 | 2.4 | YDR21 ---   | 5.7 | 1.4 |
| YKL08 CYT2   | 5.8 | 1.7 | YLR21 CRR    | 4.4 | 2.2 | YJR04 SSC1   | 4.9 | 1.3 | YDR3: ---   | 5.7 | 1.4 |
| YOR2: -      | 5.8 | 1.6 | YOR2: RIM2   | 4.4 | 1.4 | YOR2: PTP2   | 4.9 | 1.6 | YFL00 ---   | 5.7 | 1.4 |
| YML12 COX14  | 5.8 | 1.7 | YLL05 -      | 4.4 | 1.7 | YDL07 VAM:1  | 4.9 | 1.3 | YGR0: ---   | 5.7 | 1.4 |
| YJR02 BNA1   | 5.8 | 3.1 | YKR0: PET1   | 4.4 | 1.9 | YJL06: COA:1 | 4.9 | 1.8 | YGR1: ---   | 5.7 | 1.4 |
| YPR1: PIN3   | 5.8 | 1.4 | YGL1: VPS7   | 4.4 | 1.8 | YKL21 SRY1   | 4.9 | 2.0 | YJR02 ---   | 5.7 | 1.4 |
| YDR0: GIS1   | 5.8 | 1.7 | YNL27 ALP1   | 4.4 | 1.9 | YLR43 ECM:1  | 4.9 | 1.5 | YLR22 ---   | 5.7 | 1.4 |
| YGR1: CLD1   | 5.8 | 1.9 | YMR0: AAC1   | 4.4 | 1.5 | YPR1: MLC2   | 4.9 | 1.3 | YLR41 ---   | 5.7 | 1.4 |
| YGL24 PDE1   | 5.8 | 1.5 | YOL01 PLB3   | 4.4 | 1.4 | YNR0: ATO2   | 4.9 | 1.9 | YOR1: ---   | 5.7 | 1.4 |
| YNR0: PET49  | 5.7 | 1.5 | YHR1: ERG:1  | 4.3 | 1.4 | YLL02: TPO1  | 4.9 | 1.5 | YOR3: ---   | 5.7 | 1.4 |
| YDR4: NHX1   | 5.7 | 1.5 | YLR12 YPS1   | 4.3 | 1.4 | YML0: HUG    | 4.9 | 3.9 | YPR1: ---   | 5.7 | 1.4 |
| YHR0: RTC3   | 5.7 | 4.3 | YKL10 -      | 4.3 | 1.6 | YPL09 MSY    | 4.9 | 1.4 | YPR0: CIT3  | 5.7 | 1.4 |
| YDR4: YHP1   | 5.7 | 2.3 | YNL20 -      | 4.3 | 1.5 | YJR13 XPT1   | 4.9 | 1.4 | YAL05 ---   | 5.7 | 1.3 |
| YMR0: STB2   | 5.7 | 1.6 | YDL23 GYP7   | 4.3 | 1.5 | YDR3: MRP    | 4.8 | 1.5 | YDL02 ---   | 5.7 | 1.5 |
| YJR15 PGU1   | 5.7 | 2.4 | YDR2: GTB1   | 4.3 | 1.4 | YDR2: MSS    | 4.8 | 1.3 | YGR1: ---   | 5.7 | 1.9 |
| YGL22 VID30  | 5.7 | 1.5 | YLR17 TFS1   | 4.3 | 2.2 | YLR17 -      | 4.8 | 1.3 | --- ---     | 5.7 | 3.4 |
| YHR1: NVJ1   | 5.7 | 1.6 | YLR02 IZH3   | 4.3 | 1.6 | YJR15 AAD1   | 4.8 | 1.3 | YNL01 SPO   | 5.7 | 1.5 |
| YIL13: OM45  | 5.7 | 1.5 | YFL02 EPL1   | 4.3 | 1.4 | YGR0: -      | 4.8 | 2.1 | YDR5: EMI1  | 5.7 | 1.3 |
| YEL01 UBC8   | 5.7 | 1.8 | YPL07 MUK    | 4.3 | 1.5 | YBR24 -      | 4.8 | 2.0 | YLL06 GTT:1 | 5.7 | 2.6 |
| YDR3: MRPS   | 5.7 | 1.4 | YHR1: YCK1   | 4.3 | 1.4 | YBR04 FMP:1  | 4.8 | 1.6 | YLR10 ---   | 5.7 | 1.4 |
| YMR3: GLC8   | 5.7 | 1.3 | YGR2: RAD2   | 4.2 | 1.4 | YLR12 YPS1   | 4.8 | 1.4 | YOL15 ---   | 5.7 | 2.5 |
| YLR28 -      | 5.7 | 1.7 | YNR0: -      | 4.2 | 1.5 | YIL111 COX:1 | 4.8 | 2.8 | YFR0: HXK   | 5.7 | 3.6 |
| YPR0: HAA1   | 5.7 | 1.5 | YOR3: SNC2   | 4.2 | 1.5 | YLR34 KAP:1  | 4.8 | 1.3 | YCR0: ---   | 5.7 | 1.5 |
| YPL07 ATP4   | 5.7 | 1.3 | YLL03 UBI4   | 4.2 | 2.1 | YBR12 TPS1   | 4.8 | 2.0 | YOR1: GSP   | 5.6 | 2.4 |
| YCL02 HBN1   | 5.7 | 1.7 | YKL07 -      | 4.2 | 1.8 | YER1: -      | 4.7 | 1.7 | YBR01 GAL   | 5.6 | 1.5 |
| YDR1: STB3   | 5.7 | 1.5 | YBR1: KTR4   | 4.2 | 1.4 | YDR2: EXG2   | 4.7 | 1.4 | YDR01 GCV   | 5.6 | 2.4 |
| YDL04 MRP1:1 | 5.6 | 1.3 | YIR01: MET2  | 4.2 | 1.7 | YBR1: -      | 4.7 | 1.9 | YJL08: IML2 | 5.6 | 1.4 |
| YDR2: HSP78  | 5.6 | 2.0 | YBL09 SCS2   | 4.2 | 1.7 | YOR2: RDL1   | 4.7 | 1.5 | YIL101 XBP  | 5.6 | 2.9 |
| YKL16 MRP4:1 | 5.6 | 1.7 | YJL21: REE1  | 4.2 | 1.7 | YLR43 CAR:1  | 4.7 | 1.6 | YBR0: YRO   | 5.6 | 2.4 |
| YBL00 -      | 5.6 | 1.4 | YOL11 MSB:1  | 4.2 | 1.5 | YPL16 MLH:1  | 4.7 | 1.5 | --- ---     | 5.6 | 8.5 |

|             |     |     |             |     |     |             |     |     |            |     |     |     |
|-------------|-----|-----|-------------|-----|-----|-------------|-----|-----|------------|-----|-----|-----|
| YBR01-      | 5.6 | 1.4 | YOL08 ATG3  | 4.2 | 1.9 | YLR39 CST9  | 4.7 | 1.2 | ---        | --- | 5.5 | 1.6 |
| YDR2f-      | 5.6 | 1.4 | YDL24 AAD4  | 4.2 | 1.4 | YPR0c HAA1  | 4.7 | 1.4 | YGR1k TPO  |     | 5.5 | 2.5 |
| YER1f-      | 5.6 | 1.4 | YFL05 AAD1  | 4.2 | 1.4 | YBR0c NTH2  | 4.7 | 1.7 | YBR14---   |     | 5.5 | 3.6 |
| YGR0f-      | 5.6 | 1.4 | YER0f ACA1  | 4.2 | 1.6 | YEL04 YEF1  | 4.7 | 1.8 | YKL09 MBR  |     | 5.5 | 1.4 |
| YGR1f-      | 5.6 | 1.4 | YPL15 PEP4  | 4.1 | 1.6 | YAL06-      | 4.7 | 1.8 | YNL24 ZWF  |     | 5.5 | 1.4 |
| YJR02-      | 5.6 | 1.4 | YKL17 STE3  | 4.1 | 2.0 | YPR0f YME-  | 4.7 | 1.3 | YKL06 MSN  |     | 5.5 | 1.4 |
| YLR03-      | 5.6 | 1.4 | YPL11 GDE-  | 4.1 | 1.4 | YOR1f PNS1  | 4.6 | 1.6 | YMR1i DDR  |     | 5.5 | 1.7 |
| YMR0f-      | 5.6 | 1.4 | YPR0c ICL2  | 4.1 | 1.8 | YKR0f MTD-  | 4.6 | 1.3 | YMR1i DDR  |     | 5.5 | 1.7 |
| YMR0f-      | 5.6 | 1.4 | YHR0f PCL5  | 4.1 | 1.4 | YJR06-      | 4.6 | 1.2 | YKL16---   |     | 5.4 | 2.6 |
| YNL28-      | 5.6 | 1.4 | YJR09 JSN1  | 4.1 | 1.5 | YLR40-      | 4.6 | 1.3 | YJL03i---  |     | 5.4 | 2.0 |
| YOR1f-      | 5.6 | 1.4 | YGL0c-      | 4.1 | 1.6 | YNL20 SPS1  | 4.6 | 2.0 | YKL10 LAP- |     | 5.4 | 2.3 |
| YLR20 QRI5  | 5.6 | 1.4 | YEL06 HPA3  | 4.1 | 1.8 | YGL0f MRH-  | 4.6 | 1.3 | YGR2f---   |     | 5.4 | 1.5 |
| YHR0f DOG2  | 5.6 | 1.8 | YGR1f MEP-  | 4.1 | 1.5 | YOR1f RGS-  | 4.6 | 1.7 | YJR04 CYC  |     | 5.4 | 1.3 |
| YDL24 THI13 | 5.6 | 1.5 | YLR43 DIF1  | 4.1 | 1.5 | YMR2f-      | 4.6 | 2.3 | YPL23---   |     | 5.4 | 2.3 |
| YFL05 THI5  | 5.6 | 1.5 | YLR25 NDL1  | 4.1 | 1.4 | YFL02 PAUf  | 4.6 | 1.5 | YIL05f---  |     | 5.4 | 1.7 |
| YJR15 THI11 | 5.6 | 1.5 | YLR21-      | 4.1 | 1.6 | YNR01 RCF2  | 4.6 | 1.4 | YPR0f ATH  |     | 5.4 | 1.6 |
| YNL33 THI12 | 5.6 | 1.5 | YHR0f TRA1  | 4.1 | 1.4 | YNL06 FKH2  | 4.6 | 1.4 | YLR46---   |     | 5.4 | 2.0 |
| YNL25 MRPL- | 5.6 | 1.4 | YCR0c-      | 4.1 | 1.6 | YLR23 THI7  | 4.6 | 1.4 | YMR2f URA  |     | 5.4 | 1.5 |
| YJL00 COX1f | 5.6 | 1.4 | YOR1f GSP2  | 4.1 | 2.1 | YMR1f CMC-  | 4.6 | 1.4 | YLL05---   |     | 5.3 | 1.4 |
| YDR0c-      | 5.5 | 1.3 | YJL14f DAS1 | 4.1 | 1.5 | YER1c-      | 4.6 | 1.4 | YLR31---   |     | 5.3 | 4.0 |
| YOL04 RRT8  | 5.5 | 1.7 | YOR1f UBP2  | 4.1 | 1.3 | YNL20-      | 4.6 | 2.1 | YGR1f RNR  |     | 5.3 | 1.5 |
| YDR1f MRPL- | 5.5 | 1.4 | YDR3f CNL1  | 4.1 | 1.4 | YOR2f RDL2  | 4.6 | 1.4 | YOR1f---   |     | 5.3 | 1.4 |
| YDL20 MRPL- | 5.5 | 1.3 | YFR0f ROG-  | 4.1 | 1.7 | YAR0f YAT1  | 4.6 | 1.7 | YCL03 GRX  |     | 5.3 | 1.5 |
| YLR27 DCS1  | 5.5 | 2.1 | YBL00-      | 4.0 | 1.5 | YIR0f-      | 4.6 | 1.4 | YDR2f MTH  |     | 5.2 | 1.7 |
| YHL02 WSC4  | 5.5 | 4.3 | YDR2f-      | 4.0 | 1.5 | YNR0f RSM   | 4.6 | 1.8 | YNR0f---   |     | 5.2 | 1.8 |
| YBL02-      | 5.5 | 1.5 | YDR3f-      | 4.0 | 1.5 | YDR4f MZM   | 4.6 | 1.6 | YMR1f GCV  |     | 5.2 | 2.2 |
| YPR1f CUR1  | 5.5 | 1.7 | YGR0f-      | 4.0 | 1.5 | YJR05 PTK2  | 4.6 | 1.4 | YDL18 LYS- |     | 5.2 | 1.3 |
| YGR1f-      | 5.5 | 1.5 | YJR02-      | 4.0 | 1.5 | YGL22 VID3i | 4.6 | 1.4 | YHR0f---   |     | 5.2 | 1.6 |
| YPR0f ATH1  | 5.5 | 1.7 | YMR0f-      | 4.0 | 1.5 | YMR1f RPL1  | 4.6 | 1.3 | YDL02 GPM  |     | 5.2 | 3.3 |
| YBL03 MRPL- | 5.5 | 1.4 | YNL28-      | 4.0 | 1.5 | YDL14 ATGf  | 4.6 | 1.5 | YCL04---   |     | 5.2 | 2.3 |
| YKL09-      | 5.5 | 1.8 | YGR2f SER2  | 4.0 | 1.3 | YFL01-      | 4.6 | 1.6 | YER0f EDC  |     | 5.2 | 1.6 |
| YKL14 SDH3  | 5.5 | 1.4 | YOR3f ALD4  | 4.0 | 1.5 | YDR0f PST2  | 4.6 | 1.7 | YDL07 MRK  |     | 5.2 | 1.4 |
| YMR1f-      | 5.5 | 1.3 | YOR0f-      | 4.0 | 1.3 | YOL05 THI2i | 4.5 | 1.3 | YER1f SPI1 |     | 5.1 | 3.3 |
| YGR2f CIR1  | 5.4 | 1.4 | YOR3f PDR1  | 4.0 | 1.4 | YJL08f ARG- | 4.5 | 1.6 | YMR1f PAI3 |     | 5.1 | 2.9 |
| YDR0f PST2  | 5.4 | 1.7 | YPL15 PRM-  | 4.0 | 1.5 | YCR0f TAH1  | 4.5 | 1.4 | YCL04 GLK  |     | 5.1 | 2.4 |
| YBR1f ADH5  | 5.4 | 2.1 | YAL02 FRT2  | 4.0 | 1.7 | YOR1f CRC-  | 4.5 | 2.9 | YCR0f KIN8 |     | 5.1 | 1.4 |
| YBR2f OM14  | 5.4 | 1.5 | YCR0f PHOf  | 4.0 | 1.4 | YBR0f TIP1  | 4.5 | 1.3 | YOL1f---   |     | 5.1 | 2.3 |
| YAL04 GCV3  | 5.4 | 1.7 | YPR1f TDAf  | 4.0 | 1.9 | YAL01 PSK1  | 4.5 | 1.5 | YDR2f YAPi |     | 5.1 | 1.7 |
| YGR0f-      | 5.3 | 1.8 | YER0f TDA2  | 4.0 | 1.4 | YJL14f DAS1 | 4.5 | 1.5 | YDL24 AAD  |     | 5.1 | 1.8 |
| YPR0f PDH1  | 5.3 | 1.4 | YNL12 ESBf  | 4.0 | 1.6 | YPL09 SSU1  | 4.5 | 1.7 | YIL10f---  |     | 5.1 | 1.3 |
| YAL00 SSA1  | 5.3 | 1.5 | YPR0f AIM4  | 4.0 | 1.5 | YFR02 ROG-  | 4.5 | 1.6 | YAL03 FUN  |     | 5.1 | 1.5 |
| YLL02 POM3- | 5.3 | 1.5 | YOR3f GDH-  | 4.0 | 1.3 | YNR0f MRPI  | 4.5 | 1.4 | YBR2f---   |     | 5.1 | 1.4 |
| YDR4f MRP2i | 5.3 | 1.5 | YPR1f-      | 4.0 | 1.6 | YDR3f HXT7  | 4.5 | 3.1 | YFL01 MDJ  |     | 5.1 | 1.3 |
| YDR5f GRX2  | 5.3 | 1.3 | YOL1f ENB1  | 4.0 | 2.1 | YDR3f HXTf  | 4.5 | 3.1 | YMR0f STB- |     | 5.1 | 1.5 |
| YJL03 IRC18 | 5.3 | 2.0 | YJL10f SET4 | 4.0 | 6.0 | YDR4f SNM   | 4.5 | 1.2 | YIL02f---  |     | 5.1 | 1.4 |
| YGL1f RAD5f | 5.3 | 1.4 | YOR3f CPA1  | 4.0 | 1.5 | YFR01 AIM1  | 4.5 | 1.3 | YDR0f---   |     | 5.1 | 2.0 |
| YGL1f COX4  | 5.3 | 1.6 | YAR0c-      | 4.0 | 1.5 | YPR0c-      | 4.5 | 1.7 | YBL00---   |     | 5.0 | 1.5 |
| YGR1f-      | 5.3 | 2.3 | YBL00-      | 4.0 | 1.5 | YMR0f STB2  | 4.5 | 1.5 | YBR0f---   |     | 5.0 | 1.5 |
| YJL08 ARG3  | 5.3 | 1.5 | YBR0f-      | 4.0 | 1.5 | YBR0f RFS1  | 4.5 | 1.6 | YDR3f---   |     | 5.0 | 1.5 |
| YGR2f PET54 | 5.3 | 1.5 | YER1c-      | 4.0 | 1.5 | YNL03 IDH1  | 4.5 | 1.6 | YER1f---   |     | 5.0 | 1.5 |
| YPL08 YDC1  | 5.3 | 1.8 | YGR0f-      | 4.0 | 1.5 | YKL09-      | 4.5 | 1.8 | YGR0f---   |     | 5.0 | 1.5 |
| YBR0f AKL1  | 5.3 | 1.5 | YGR1f-      | 4.0 | 1.5 | YOR3f CIN1  | 4.5 | 1.5 | YGR1f---   |     | 5.0 | 1.5 |
| YPL02 RMI1  | 5.3 | 1.5 | YJR02-      | 4.0 | 1.5 | YOL15-      | 4.5 | 1.4 | YHR2f---   |     | 5.0 | 1.5 |
| YPL02 SKS1  | 5.3 | 2.0 | YJR02-      | 4.0 | 1.5 | YCL02 HBN-  | 4.5 | 1.6 | YJR02---   |     | 5.0 | 1.5 |
| YOR1f-      | 5.2 | 1.6 | YLR15-      | 4.0 | 1.5 | YIL15f BNR- | 4.5 | 1.4 | YLR03---   |     | 5.0 | 1.5 |
| YHR0f DOG2  | 5.2 | 1.4 | YML0c-      | 4.0 | 1.5 | YAL00 VPSf  | 4.4 | 1.3 | YML04---   |     | 5.0 | 1.5 |
| YHR0f DOG1  | 5.2 | 1.4 | YMR0f-      | 4.0 | 1.5 | YGR2f MRPI  | 4.4 | 1.2 | YMR0f---   |     | 5.0 | 1.5 |
| YBR0f RFS1  | 5.2 | 1.7 | YNL28-      | 4.0 | 1.5 | YAL03 FUN1  | 4.4 | 1.4 | YMR0f---   |     | 5.0 | 1.5 |
| YLR08 EMP4f | 5.2 | 2.3 | YOL1c-      | 4.0 | 1.5 | YLR17 RFX1  | 4.4 | 1.4 | YNL28---   |     | 5.0 | 1.5 |
| YNR0f CPR8  | 5.2 | 1.3 | YOR1f-      | 4.0 | 1.5 | YGR1f GTF1  | 4.4 | 1.4 | YOR1f---   |     | 5.0 | 1.5 |
| YGR2f MRPLf | 5.2 | 1.3 | YPL25-      | 4.0 | 1.5 | YDL23 GYP-  | 4.4 | 1.4 | YPR1f---   |     | 5.0 | 1.5 |
| YJL05 IKS1  | 5.2 | 1.4 | YLR27-      | 4.0 | 1.4 | YOR1f GAC-  | 4.4 | 2.4 | YPR1f---   |     | 5.0 | 1.5 |
| YER1f BUR6  | 5.2 | 1.3 | YJR10 ECM-  | 4.0 | 1.5 | YOL01 CMK-  | 4.4 | 1.6 | YBL03---   |     | 5.0 | 1.3 |
| YKR0f GLG1  | 5.1 | 2.1 | YOR0f GLOf  | 4.0 | 2.0 | YGL11 ABC1  | 4.4 | 1.3 | YMR1f---   |     | 5.0 | 1.4 |
| YOR1f TUF1  | 5.1 | 1.5 | YAR0f-      | 4.0 | 1.4 | YNL30 BXI1  | 4.4 | 1.7 | YPL17 OYE  |     | 5.0 | 2.6 |
| YIL12f AYR1 | 5.1 | 1.5 | YBR0f-      | 4.0 | 1.4 | YLR07 FMP2  | 4.4 | 1.3 | YIL17f PAU |     | 5.0 | 1.4 |
| YMR0f PLB2  | 5.1 | 1.5 | YBR0f-      | 4.0 | 1.4 | YLR39 ECM-  | 4.4 | 1.7 | YJL22f PAU |     | 5.0 | 1.4 |
| YDR2f ATP5  | 5.1 | 1.3 | YDR0f-      | 4.0 | 1.4 | YHR1f KIC1  | 4.4 | 1.6 | YNL20 SPS  |     | 5.0 | 1.9 |
| YIL15f GUT2 | 5.1 | 1.5 | YDR0f-      | 4.0 | 1.4 | YER11 AVTf  | 4.4 | 2.0 | YBR3f DAN  |     | 5.0 | 1.8 |
| YBL10-      | 5.1 | 1.4 | YDR2f-      | 4.0 | 1.4 | YPL02 RMI1  | 4.4 | 1.4 | YDR0f GAL- |     | 5.0 | 1.3 |
| YGL2f-      | 5.1 | 2.1 | YDR2f-      | 4.0 | 1.4 | YOL15 GRE-  | 4.4 | 1.5 | YPL25 ICY2 |     | 5.0 | 1.7 |

|              |     |     |             |     |     |             |     |     |             |     |     |
|--------------|-----|-----|-------------|-----|-----|-------------|-----|-----|-------------|-----|-----|
| YPL12 RNY1   | 5.1 | 2.3 | YDR2f -     | 4.0 | 1.4 | YMR1f ICY1  | 4.4 | 1.7 | YKR0f MRS   | 5.0 | 1.3 |
| YLR06 PET30  | 5.1 | 1.2 | YDR2f -     | 4.0 | 1.4 | YGR0f SPR3  | 4.4 | 2.1 | YPL11 CAR   | 5.0 | 1.3 |
| YPL00 LSP1   | 5.1 | 1.5 | YDR3f -     | 4.0 | 1.4 | YPL08 MOT   | 4.4 | 1.4 | YBR1f YPC   | 5.0 | 1.7 |
| YMR2f ZDS1   | 5.1 | 1.3 | YDR3f -     | 4.0 | 1.4 | YMR0f ECM   | 4.4 | 1.2 | YDR3f HXT   | 5.0 | 1.2 |
| YBL10 -      | 5.1 | 1.4 | YDR3f -     | 4.0 | 1.4 | YFR0f CDC   | 4.4 | 1.5 | YNL27 ALP   | 4.9 | 1.8 |
| YCL01 -      | 5.1 | 1.4 | YDR3f -     | 4.0 | 1.4 | YDR4f CYM   | 4.4 | 1.5 | YGR1f TPO   | 4.9 | 1.3 |
| YDR0f -      | 5.1 | 1.4 | YER1f -     | 4.0 | 1.4 | YOL07 EMI5  | 4.4 | 1.7 | YPR1f TPO   | 4.9 | 1.3 |
| YDR0f -      | 5.1 | 1.4 | YER1f -     | 4.0 | 1.4 | YDR0f TGL2  | 4.4 | 1.5 | YIL16f ---  | 4.9 | 2.5 |
| YDR2f -      | 5.1 | 1.4 | YER1f -     | 4.0 | 1.4 | YMR1f ALD2  | 4.4 | 1.6 | YOL1f ---   | 4.9 | 2.5 |
| YDR2f -      | 5.1 | 1.4 | YER1f -     | 4.0 | 1.4 | YCR0f SSK2  | 4.3 | 1.4 | YNL11 ---   | 4.9 | 1.7 |
| YDR3f -      | 5.1 | 1.4 | YGR0f -     | 4.0 | 1.4 | YCR0f IMG1  | 4.3 | 1.5 | YOL0f ---   | 4.9 | 1.8 |
| YFL00 -      | 5.1 | 1.4 | YGR0f -     | 4.0 | 1.4 | YMR0f NAT2  | 4.3 | 1.5 | YJL14 YAK   | 4.9 | 1.5 |
| YGR0f -      | 5.1 | 1.4 | YGR0f -     | 4.0 | 1.4 | YPL06 -     | 4.3 | 1.8 | YBR0f SCO   | 4.9 | 1.4 |
| YGR1f -      | 5.1 | 1.4 | YGR0f -     | 4.0 | 1.4 | YIL10f -    | 4.3 | 1.2 | YKR0f MTD   | 4.9 | 1.3 |
| YJR02 -      | 5.1 | 1.4 | YGR1f -     | 4.0 | 1.4 | YNL18 MRPI  | 4.3 | 1.4 | YDL04 KNH   | 4.9 | 1.3 |
| YLR22 -      | 5.1 | 1.4 | YGR1f -     | 4.0 | 1.4 | YDL11 -     | 4.3 | 1.7 | YGL0f PNC   | 4.9 | 2.2 |
| YLR41 -      | 5.1 | 1.4 | YHR2f -     | 4.0 | 1.4 | YHR11 -     | 4.3 | 1.5 | --- ---     | 4.9 | 4.9 |
| YOR1f -      | 5.1 | 1.4 | YHR2f -     | 4.0 | 1.4 | YGR2f IMA1  | 4.3 | 1.3 | YDR2f ---   | 4.8 | 1.1 |
| YOR3f -      | 5.1 | 1.4 | YJR02 -     | 4.0 | 1.4 | YJL15f HSP1 | 4.3 | 1.3 | YDL13 STF   | 4.8 | 2.3 |
| YPR1f -      | 5.1 | 1.4 | YJR02 -     | 4.0 | 1.4 | YLR32 -     | 4.3 | 1.3 | YGL1f ATG   | 4.8 | 1.5 |
| YER11 SWI4   | 5.1 | 1.4 | YJR02 -     | 4.0 | 1.4 | YDR4f SNX2  | 4.3 | 1.3 | YOR2f ---   | 4.8 | 1.4 |
| YML0f YML6   | 5.1 | 1.4 | YJR02 -     | 4.0 | 1.4 | YLR17 -     | 4.3 | 1.6 | YJR13 STR   | 4.8 | 1.3 |
| YFR01 GSY1   | 5.1 | 3.4 | YLR15 -     | 4.0 | 1.4 | YPL06 RGL1  | 4.3 | 1.3 | YJL08f SIP4 | 4.8 | 2.0 |
| YBR1f YPC1   | 5.1 | 1.7 | YLR15 -     | 4.0 | 1.4 | YJL07f -    | 4.3 | 1.5 | YGR0f SPR   | 4.8 | 2.0 |
| YKL05 MDM3   | 5.1 | 1.4 | YLR22 -     | 4.0 | 1.4 | YOL12 SMF   | 4.3 | 1.4 | --- ---     | 4.8 | 4.6 |
| YPR1f KRE6   | 5.0 | 1.3 | YLR22 -     | 4.0 | 1.4 | YPR0f HAL1  | 4.3 | 1.4 | YLR32 PEX   | 4.8 | 1.3 |
| YDL02 RTK1   | 5.0 | 1.7 | YLR25 -     | 4.0 | 1.4 | YMR0f VBA1  | 4.3 | 1.3 | YDR4f ARO   | 4.8 | 1.3 |
| YDR2f DPP1   | 5.0 | 1.5 | YML0f -     | 4.0 | 1.4 | YGR2f KEL2  | 4.3 | 1.3 | YDL11 ---   | 4.8 | 1.7 |
| YOR2f RCN2   | 5.0 | 1.7 | YML0f -     | 4.0 | 1.4 | YHR1f YAP1  | 4.3 | 1.4 | YHR1f SPO   | 4.8 | 1.3 |
| YPL09 SSU1   | 5.0 | 1.7 | YML0f -     | 4.0 | 1.4 | YCR01 SRD   | 4.3 | 1.4 | YLR46 ---   | 4.7 | 1.9 |
| YER0f ICL1   | 5.0 | 1.5 | YML0f -     | 4.0 | 1.4 | YKR0f MRPI  | 4.3 | 1.4 | YGR2f RAD   | 4.7 | 1.3 |
| YML11 COQ5   | 5.0 | 1.4 | YMR0f -     | 4.0 | 1.4 | YOR2f RIM2  | 4.2 | 1.3 | YOR0f PEP   | 4.7 | 1.5 |
| YPR0f ROX1   | 5.0 | 1.4 | YMR0f -     | 4.0 | 1.4 | YMR1f SGS   | 4.2 | 1.4 | YIL09f FYV  | 4.7 | 1.4 |
| YDR0f TPS2   | 5.0 | 2.0 | YNL0f -     | 4.0 | 1.4 | YLR30 ACO   | 4.2 | 1.4 | YOR1f SIA1  | 4.7 | 1.4 |
| YBR1f CSH1   | 5.0 | 1.5 | YOL1f -     | 4.0 | 1.4 | YBR2f SPO   | 4.2 | 2.0 | YDL24 ---   | 4.6 | 1.3 |
| YDL23 GYP7   | 5.0 | 1.4 | YOL1f -     | 4.0 | 1.4 | YAL02 FRT2  | 4.2 | 1.7 | YDL05 RAD   | 4.6 | 1.2 |
| YDR0f PET10  | 5.0 | 1.6 | YOR1f -     | 4.0 | 1.4 | YOL0f DUF1  | 4.2 | 1.3 | YOR3f RDR   | 4.6 | 1.2 |
| YER0f AIM11  | 5.0 | 1.5 | YOR1f -     | 4.0 | 1.4 | YPR1f OPT2  | 4.2 | 2.0 | YDR4f PPN   | 4.6 | 1.3 |
| YML0f MRPL   | 5.0 | 1.4 | YPL25 -     | 4.0 | 1.4 | YEL01 UBC   | 4.2 | 1.6 | YAR0f PAU   | 4.6 | 1.7 |
| YJL00f CYR1  | 5.0 | 1.8 | YPL25 -     | 4.0 | 1.4 | YGL1f ATG1  | 4.2 | 1.5 | YMR0f SPO   | 4.6 | 1.6 |
| YLR40 -      | 5.0 | 1.2 | YPR1f -     | 4.0 | 1.4 | YHR0f SOD   | 4.2 | 1.4 | YJL03f SNX  | 4.6 | 1.2 |
| YGL0f PNC1   | 4.9 | 2.3 | YPR1f -     | 4.0 | 1.4 | YNL02 ARK1  | 4.2 | 1.3 | YLR21 CPR   | 4.6 | 1.2 |
| YLR03 SMF3   | 4.9 | 1.5 | YPR1f -     | 4.0 | 1.4 | YIL06f FIS1 | 4.2 | 1.4 | YPL11 GDE   | 4.6 | 1.3 |
| YBR0f -      | 4.9 | 1.8 | YPR1f -     | 4.0 | 1.4 | YGL2f MTO   | 4.2 | 1.4 | YJL04f UBX  | 4.6 | 1.4 |
| YKL15 -      | 4.9 | 2.2 | YPR1f -     | 4.0 | 1.4 | YOL0f PHM   | 4.2 | 2.2 | YAL06 SEO   | 4.6 | 1.6 |
| YOR0f SGO1   | 4.9 | 1.2 | YPR1f -     | 4.0 | 1.4 | YMR1f -     | 4.2 | 1.3 | YAR0f ---   | 4.6 | 1.4 |
| YKL06 YET1   | 4.9 | 1.3 | YBR2f -     | 3.9 | 1.6 | YNL24 ATG2  | 4.2 | 1.5 | YBL00 ---   | 4.6 | 1.4 |
| YLR41 PUN1   | 4.9 | 1.3 | YNL17 TDA7  | 3.9 | 1.4 | YKL06 -     | 4.2 | 1.4 | YBR01 ---   | 4.6 | 1.4 |
| YDL03 GPR1   | 4.9 | 1.3 | YMR0f STB2  | 3.9 | 1.6 | YDR0f UBC   | 4.2 | 1.4 | YER1f ---   | 4.6 | 1.4 |
| YJL10f MEF2  | 4.9 | 1.4 | YOR0f -     | 3.9 | 1.4 | YOR3f FIT3  | 4.2 | 1.8 | YGR0f ---   | 4.6 | 1.4 |
| YHR0f COX6   | 4.9 | 1.4 | YKR0f GPT2  | 3.9 | 1.6 | YCR0f AHC   | 4.2 | 1.2 | YGR1f ---   | 4.6 | 1.4 |
| YMR3f TGL3   | 4.9 | 1.3 | YGL01 PDR1  | 3.9 | 1.4 | YKL09 MTC   | 4.2 | 1.3 | YJR02 ---   | 4.6 | 1.4 |
| YIL10f -     | 4.9 | 1.2 | YOL11 RRI2  | 3.9 | 1.5 | YMR0f YET2  | 4.1 | 1.6 | YJR02 ---   | 4.6 | 1.4 |
| YHR0f -      | 4.9 | 1.7 | YLR05 -     | 3.9 | 1.8 | YJR11 RSM   | 4.1 | 1.5 | YLR15 ---   | 4.6 | 1.4 |
| YMR1f OSW5   | 4.9 | 1.4 | YLR08 EMP2  | 3.9 | 2.0 | YFR0f YFH7  | 4.1 | 1.6 | YML0f ---   | 4.6 | 1.4 |
| YBR0f NRG2   | 4.8 | 1.5 | YHR0f -     | 3.9 | 1.4 | YPL17 TRE1  | 4.1 | 1.3 | YMR0f ---   | 4.6 | 1.4 |
| YBR1f -      | 4.8 | 1.9 | YJR05 RAD7  | 3.9 | 1.4 | YCR0f PHO   | 4.1 | 1.3 | YNL28 ---   | 4.6 | 1.4 |
| YOL0f IFM1   | 4.8 | 1.5 | YMR2f ERG2  | 3.9 | 1.3 | YDR3f MSN   | 4.1 | 1.3 | YOL1f ---   | 4.6 | 1.4 |
| YJL15f SNA3  | 4.8 | 1.5 | YKL05 MDM   | 3.8 | 1.5 | YCL03 MXR   | 4.1 | 1.7 | YOR1f ---   | 4.6 | 1.4 |
| YJL11f NCA3  | 4.8 | 2.6 | YNL03 IDH1  | 3.8 | 1.5 | YFL04 -     | 4.1 | 1.4 | YPL25 ---   | 4.6 | 1.4 |
| YPL07f UBP1f | 4.8 | 1.3 | YDR2f ADR1  | 3.8 | 1.5 | YNL28 HCH   | 4.1 | 1.3 | YLR10 AHP   | 4.6 | 1.2 |
| YPL04f ISM1  | 4.8 | 1.4 | YGR0f -     | 3.8 | 1.4 | YOL0f SIN3  | 4.1 | 1.3 | YNR0f ---   | 4.6 | 1.6 |
| YBR21f SDS24 | 4.8 | 2.6 | YDL24 COS   | 3.8 | 1.7 | YER11f SWI4 | 4.1 | 1.5 | YHR1f TRR   | 4.6 | 1.2 |
| YGL0f OCH1   | 4.8 | 1.6 | YJR16 COS   | 3.8 | 1.7 | YOR3f -     | 4.1 | 4.3 | YLR08 EMP   | 4.6 | 2.0 |
| YGR2f ENO1   | 4.8 | 2.0 | YOR0f AKR2  | 3.8 | 1.4 | YDR5f EMI2  | 4.1 | 1.9 | YLR29 ---   | 4.5 | 1.5 |
| YJL16f QCR8  | 4.8 | 1.4 | YLL06 GTT2  | 3.8 | 2.1 | YDR31f TFB1 | 4.1 | 1.2 | YDL21f GDH  | 4.5 | 1.5 |
| YER1f COX1f  | 4.8 | 1.7 | YBR1f SSE2  | 3.8 | 1.7 | YPR0f AIM4  | 4.1 | 1.4 | YDR3f YPS   | 4.5 | 1.2 |
| YOR0f -      | 4.8 | 1.4 | YJL15f INO1 | 3.8 | 1.5 | YKR0f SRL3  | 4.1 | 1.6 | YMR1f RIM   | 4.5 | 1.2 |
| YDR0f RSM1f  | 4.8 | 1.4 | YKL20f MNN  | 3.8 | 1.8 | YER0f RSM   | 4.1 | 1.3 | YML1f ---   | 4.5 | 1.6 |
| YCL05f MOS1  | 4.8 | 1.4 | YMR2f ERG   | 3.8 | 1.5 | YAL05f OAF1 | 4.1 | 1.3 | YLR37f PSY  | 4.5 | 1.4 |
| YMR0f MRPL   | 4.8 | 1.4 | YBR1f ICS2  | 3.8 | 1.5 | YJL12f -    | 4.1 | 1.6 | YKR0f GAP   | 4.5 | 2.0 |

|             |     |     |            |     |     |             |     |     |            |     |     |     |
|-------------|-----|-----|------------|-----|-----|-------------|-----|-----|------------|-----|-----|-----|
| YCR07 IMG2  | 4.8 | 1.3 | YBL00 -    | 3.8 | 1.5 | YNL05 POR   | 4.1 | 1.3 | YLR25 NDL  | 4.5 | 1.3 |     |
| YGR07 -     | 4.8 | 2.1 | YBR01 -    | 3.8 | 1.5 | YML12 COX   | 4.1 | 1.5 | YOR37 GDH  | 4.4 | 1.2 |     |
| YJR00 -     | 4.8 | 2.3 | YDR31 -    | 3.8 | 1.5 | YGR27 RSM   | 4.1 | 1.4 | YJL15 HSP  | 4.4 | 1.3 |     |
| YIL08 AVT7  | 4.8 | 1.5 | YER16 -    | 3.8 | 1.5 | YEL07 RMD   | 4.1 | 1.3 | YOR38 FRE  | 4.4 | 1.9 |     |
| YHR14 -     | 4.8 | 2.7 | YGR07 -    | 3.8 | 1.5 | YMR27 BCH   | 4.1 | 1.3 | YBR28 PCA  | 4.4 | 1.7 |     |
| YHR07 PPE1  | 4.7 | 1.7 | YGR16 -    | 3.8 | 1.5 | YJR03 PET1  | 4.1 | 1.5 | YLR13 SLX  | 4.4 | 1.2 |     |
| YDL04 KNH1  | 4.7 | 1.4 | YHR21 -    | 3.8 | 1.5 | YGR17 CBP   | 4.1 | 1.4 | YLL05 FRE  | 4.4 | 1.3 |     |
| YMR17 CLN1  | 4.7 | 1.6 | YJR02 -    | 3.8 | 1.5 | YGL03 -     | 4.1 | 1.3 | YDR34 HXT  | 4.4 | 1.9 |     |
| YJR10 RSM2  | 4.7 | 1.5 | YLR03 -    | 3.8 | 1.5 | YBR08 PHO   | 4.1 | 1.4 | YDR34 HXT  | 4.4 | 1.9 |     |
| YDR52 SNA2  | 4.7 | 1.5 | YML04 -    | 3.8 | 1.5 | YGR17 CLD1  | 4.0 | 1.6 | ---        | --- | 4.4 | 3.1 |
| YDR37 ATP17 | 4.7 | 1.5 | YMR0 -     | 3.8 | 1.5 | YOR08 ECM   | 4.0 | 1.3 | YLR17 ---  | 4.4 | 1.4 |     |
| YNR00 SWM2  | 4.7 | 1.4 | YMR07 -    | 3.8 | 1.5 | YBR17 EHT1  | 4.0 | 1.6 | YJR09 ---  | 4.4 | 1.8 |     |
| YBR02 ETR1  | 4.7 | 1.4 | YNL28 -    | 3.8 | 1.5 | YMR07 -     | 4.0 | 1.3 | YIR03 GTT  | 4.4 | 1.8 |     |
| YBR24 THI2  | 4.7 | 1.4 | YOR14 -    | 3.8 | 1.5 | YLR32 PEX   | 4.0 | 1.4 | YKL14 MRP  | 4.4 | 1.3 |     |
| YML12 NDI1  | 4.7 | 1.9 | YPR15 -    | 3.8 | 1.5 | YOR27 TPO   | 4.0 | 2.7 | YIL16 ---  | 4.4 | 1.8 |     |
| YMR19 CMC4  | 4.7 | 1.4 | YPR15 -    | 3.8 | 1.5 | YCL01 -     | 4.0 | 1.4 | YGL18 STR  | 4.4 | 1.7 |     |
| YNL20 -     | 4.7 | 1.4 | YNL01 PBI2 | 3.8 | 2.1 | YOL14 ARG   | 4.0 | 1.3 | YGR17 ---  | 4.4 | 1.4 |     |
| YPR12 AXL1  | 4.7 | 1.3 | YGR20 CIR1 | 3.8 | 1.4 | YDR50 PSP1  | 4.0 | 1.3 | YDR38 GGA  | 4.4 | 1.4 |     |
| YNL11 MLS1  | 4.7 | 1.8 | YGR17 PSD2 | 3.8 | 1.3 | YMR17 DDR   | 4.0 | 1.5 | YHR13 ARO  | 4.4 | 1.1 |     |
| YER06 THO1  | 4.7 | 1.3 | YDR27 COX2 | 3.8 | 1.4 | YMR17 DDR   | 4.0 | 1.5 | YHR08 PUT  | 4.3 | 1.2 |     |
| YOR38 FIT2  | 4.6 | 1.7 | YDL13 RGT2 | 3.8 | 1.4 | YLR05 -     | 4.0 | 1.8 | YGL10 VPS  | 4.3 | 1.5 |     |
| YHR07 VMA10 | 4.6 | 1.2 | YBL09 BNA4 | 3.8 | 1.5 | YOR14 -     | 4.0 | 1.6 | YKL03 PTM  | 4.3 | 1.2 |     |
| YMR07 AAC1  | 4.6 | 1.6 | YDR38 GGA  | 3.7 | 1.5 | YPR04 THP   | 4.0 | 1.3 | YGL05 ---  | 4.3 | 1.3 |     |
| YHL02 AIM17 | 4.6 | 3.1 | YIL06 RNR  | 3.7 | 1.9 | YIR03 LYS1  | 4.0 | 1.4 | YJR09 JSN  | 4.3 | 1.3 |     |
| YFL02 GAT1  | 4.6 | 1.5 | YHL02 AIM1 | 3.7 | 2.8 | YJL15 INO1  | 4.0 | 1.4 | YPL22 GRE  | 4.3 | 6.0 |     |
| YIL07 MAM3  | 4.6 | 1.6 | YGR08 ADE  | 3.7 | 1.3 | YPL22 FLC1  | 4.0 | 1.5 | YOL03 ---  | 4.3 | 1.4 |     |
| YJR15 AAD10 | 4.6 | 1.3 | YFR02 LSB3 | 3.7 | 1.4 | YDR48 PKH1  | 4.0 | 1.5 | YLR18 ATG  | 4.2 | 1.3 |     |
| YDL24 AAD4  | 4.6 | 1.4 | YCR10 AAD  | 3.7 | 1.4 | YOR17 UBP   | 4.0 | 1.2 | YJL09 HPR  | 4.2 | 1.2 |     |
| YFL05 AAD16 | 4.6 | 1.4 | YGR18 CRH  | 3.7 | 1.6 | YNL07 TOM   | 4.0 | 1.2 | YBR28 RIB  | 4.2 | 1.2 |     |
| YDR06 OCA6  | 4.6 | 1.2 | YER17 TMT1 | 3.7 | 1.5 | YJR09 JSN1  | 4.0 | 1.5 | YLR27 DCS  | 4.2 | 1.7 |     |
| YKR08 PXL1  | 4.6 | 1.3 | YGR17 FHN1 | 3.7 | 1.5 | YLR43 MRPI  | 4.0 | 1.6 | YKL15 ---  | 4.2 | 2.0 |     |
| YDL01 GRX6  | 4.6 | 1.3 | YGL02 PIB2 | 3.7 | 1.4 | YDR58 HSP   | 4.0 | 2.5 | YBR10 FES  | 4.2 | 1.2 |     |
| YGR27 RSM2  | 4.6 | 1.3 | YLL02 TPO1 | 3.7 | 1.4 | YPR11 -     | 4.0 | 1.3 | YKL10 HAP  | 4.2 | 1.4 |     |
| YKR08 GPT2  | 4.6 | 1.6 | YGR14 ECL1 | 3.7 | 1.4 | YPL24 -     | 4.0 | 1.2 | YLR26 LCB  | 4.2 | 1.3 |     |
| YPL11 HOS3  | 4.6 | 1.3 | YPL08 YDC1 | 3.7 | 1.7 | YMR28 PPA   | 4.0 | 1.4 | YDR12 ---  | 4.2 | 1.2 |     |
| YJL13 LCB3  | 4.6 | 1.3 | YLR18 ATG  | 3.7 | 1.4 | YGL11 -     | 4.0 | 1.4 | YKL22 MCH  | 4.2 | 1.8 |     |
| YMR18 MRPS  | 4.6 | 1.4 | YBR08 RCR  | 3.7 | 1.4 | YGL01 JAC1  | 4.0 | 1.6 | YER07 ---  | 4.2 | 1.5 |     |
| YDL13 SCM3  | 4.5 | 1.4 | YPR08 GRS  | 3.7 | 1.6 | YGR28 RAD   | 4.0 | 1.4 | ---        | --- | 4.2 | 4.3 |
| YGR17 CBP4  | 4.5 | 1.4 | YHR07 MIP6 | 3.7 | 1.5 | YIR03 YPS   | 3.9 | 1.5 | YGR08 ---  | 4.2 | 1.5 |     |
| YJR05 -     | 4.5 | 1.3 | YKL06 MSN  | 3.7 | 1.5 | YCR07 -     | 3.9 | 1.4 | YPL22 ---  | 4.2 | 1.4 |     |
| YHL02 RMD1  | 4.5 | 1.2 | YOL15 HXT1 | 3.7 | 1.6 | YDL08 -     | 3.9 | 1.4 | YGR18 ---  | 4.2 | 1.4 |     |
| YIL157 COA1 | 4.5 | 1.4 | YHR08 DOG  | 3.7 | 1.4 | YNL13 CPT1  | 3.9 | 1.4 | YKL02 GPX  | 4.2 | 1.8 |     |
| YNL03 IDH1  | 4.5 | 1.4 | YHR08 DOG  | 3.7 | 1.4 | YGL24 PDE1  | 3.9 | 1.3 | YGL01 ---  | 4.2 | 1.2 |     |
| YDR28 MHR1  | 4.5 | 1.4 | YFL04 -    | 3.7 | 1.4 | YFR01 FAB1  | 3.9 | 1.4 | YGL16 RAD  | 4.2 | 1.3 |     |
| YMR27 SCS7  | 4.5 | 1.8 | YLR17 -    | 3.7 | 1.4 | YLR21 COA   | 3.9 | 1.7 | YLR01 LOT  | 4.2 | 1.3 |     |
| YOR38 MRS2  | 4.5 | 1.4 | YER08 ZRG  | 3.7 | 1.8 | YDR48 ARO   | 3.9 | 1.3 | YBL04 MOF  | 4.2 | 2.8 |     |
| YNL32 KRE1  | 4.5 | 1.3 | YIR00 -    | 3.6 | 1.8 | YBR08 POA   | 3.9 | 1.2 | YPR18 PIN  | 4.2 | 1.3 |     |
| YFR01 AIM13 | 4.5 | 1.3 | YDR28 SSD1 | 3.6 | 1.4 | YLR36 MDM   | 3.9 | 1.3 | YER08 ---  | 4.1 | 3.0 |     |
| YJL16 TPK1  | 4.5 | 2.1 | YNL20 -    | 3.6 | 1.9 | YOR28 RCN   | 3.9 | 1.5 | YNR01 ---  | 4.1 | 1.6 |     |
| YAL06 -     | 4.5 | 1.7 | YOR28 RDL1 | 3.6 | 1.5 | YHR08 QCR   | 3.9 | 1.4 | YGR08 ---  | 4.1 | 1.5 |     |
| YLR12 YPS3  | 4.5 | 1.5 | YDR52 SNA  | 3.6 | 1.5 | YMR17 GID8  | 3.9 | 1.3 | YER08 ---  | 4.1 | 3.6 |     |
| YKL14 MRP8  | 4.5 | 1.4 | YGL24 -    | 3.6 | 1.3 | YPL21 THI6  | 3.9 | 1.3 | YDR07 TPS  | 4.1 | 1.7 |     |
| YKR07 MSA2  | 4.5 | 1.4 | YER11 SWI4 | 3.6 | 1.5 | YIL172 FSP2 | 3.9 | 1.3 | YOL15 ENB  | 4.1 | 1.9 |     |
| YDL18 -     | 4.5 | 1.3 | YPL02 SKS1 | 3.6 | 1.6 | YJL22 FSP2  | 3.9 | 1.3 | YPL21 THI6 | 4.1 | 1.2 |     |
| YJL18 -     | 4.5 | 1.3 | YGL21 CLG1 | 3.6 | 2.0 | YOL15 FSP2  | 3.9 | 1.3 | YOR10 CRC  | 4.1 | 2.5 |     |
| YGR08 COX1  | 4.5 | 1.5 | YLR03 SMF  | 3.6 | 1.4 | YJR09 GRR   | 3.9 | 1.2 | YEL01 UBC  | 4.1 | 1.5 |     |
| YAL00 VPS8  | 4.5 | 1.3 | YBR28 -    | 3.6 | 1.4 | YCL05 MOS   | 3.9 | 1.4 | YMR28 ---  | 4.1 | 1.5 |     |
| YOR28 YPK9  | 4.5 | 1.4 | YJL17 CPS1 | 3.6 | 1.6 | YBL04 EDE1  | 3.9 | 1.3 | YCR08 CIT2 | 4.1 | 1.6 |     |
| YOR08 ECM3  | 4.4 | 1.4 | YBR07 -    | 3.6 | 1.4 | YFR02 PTR   | 3.9 | 1.4 | YEL07 ---  | 4.0 | 1.6 |     |
| YFL02 PAU5  | 4.4 | 1.5 | YGR07 ROM  | 3.6 | 1.5 | YIL05 -     | 3.9 | 1.5 | YDR51 EMI  | 4.0 | 1.8 |     |
| YJL18 ATP12 | 4.4 | 1.3 | YAR08 SWH  | 3.6 | 1.3 | YDL19 -     | 3.9 | 1.4 | YLR02 SNF  | 4.0 | 1.2 |     |
| YDR07 -     | 4.4 | 1.9 | YMR28 -    | 3.6 | 1.4 | YDR51 EMI1  | 3.9 | 1.3 | YCR07 SSK  | 4.0 | 1.3 |     |
| YER01 -     | 4.4 | 1.4 | YDR08 TGL2 | 3.6 | 1.5 | YKL05 MDM   | 3.9 | 1.4 | YPL15 PET  | 4.0 | 1.2 |     |
| YGR28 TOS2  | 4.4 | 1.4 | YOL08 DUF1 | 3.6 | 1.3 | YFR04 BNA   | 3.9 | 1.4 | YOR17 ---  | 4.0 | 1.3 |     |
| YIR03 YPS6  | 4.4 | 1.2 | YGR08 SEC  | 3.6 | 1.4 | YLR27 -     | 3.9 | 1.2 | YDL23 GYP  | 4.0 | 1.5 |     |
| YLR20 PNP1  | 4.4 | 1.3 | YLR29 ECM  | 3.5 | 1.4 | YPL15 PEP   | 3.8 | 1.4 | YNR08 CIT1 | 4.0 | 1.4 |     |
| YBR12 MRPL  | 4.4 | 1.3 | YPR18 PIN  | 3.5 | 1.4 | YDR28 MHR   | 3.8 | 1.4 | YLR30 CDA  | 4.0 | 2.2 |     |
| YKL19 SDS2  | 4.4 | 1.5 | YBR28 MAL  | 3.5 | 1.5 | YKL08 CYT   | 3.8 | 1.5 | YPL26 ---  | 4.0 | 1.3 |     |
| YOR17 UBP2  | 4.4 | 1.2 | YCR08 CPR  | 3.5 | 1.5 | YOR38 MRS   | 3.8 | 1.3 | YPL17 ---  | 4.0 | 1.2 |     |
| YLR19 UPS1  | 4.4 | 1.4 | YCL03 GRX  | 3.5 | 1.5 | YPL18 RTC   | 3.8 | 1.3 | YEL06 SIT1 | 4.0 | 2.1 |     |
| YDR08 AIM7  | 4.4 | 1.4 | YLR21 COA  | 3.5 | 1.8 | YAR02 -     | 3.8 | 1.4 | YPR07 ---  | 4.0 | 1.8 |     |



|              |     |     |             |     |     |             |     |     |            |     |     |
|--------------|-----|-----|-------------|-----|-----|-------------|-----|-----|------------|-----|-----|
| YPR2C ARR2   | 4.4 | 1.4 | YCL04 GLK1  | 3.5 | 2.1 | YFR04 KEG   | 3.8 | 1.3 | YDR0C RAD  | 4.0 | 1.2 |
| YIL017 VID28 | 4.4 | 1.5 | YDR3E -     | 3.5 | 1.5 | YJR12 CAF1  | 3.8 | 1.5 | YML0C ---  | 4.0 | 1.3 |
| YGL1C VPS7E  | 4.4 | 1.7 | YHR1E NDTF  | 3.5 | 1.5 | YLR30 STT4  | 3.8 | 1.2 | YMR1C GIDF | 4.0 | 1.4 |
| YGL21 MDM3   | 4.4 | 1.4 | YGR0U UGA   | 3.5 | 1.8 | YOR1E TUF1  | 3.8 | 1.4 | YGR0E PDC  | 4.0 | 1.6 |
| YNL24 ATG2   | 4.4 | 1.5 | YPR0Z ATH1  | 3.5 | 1.5 | YPR0Z ATG1  | 3.8 | 1.3 | YBL10 ECM  | 4.0 | 1.2 |
| YOR2Z DGA1   | 4.4 | 1.2 | YGR0E FMPZ  | 3.5 | 1.5 | YER01 TIR1  | 3.8 | 1.6 | YAL06 ---  | 3.9 | 1.3 |
| YMR3E YME2   | 4.4 | 1.3 | YPL18 UIP4  | 3.5 | 1.6 | YER0E AIM1  | 3.8 | 1.4 | YBL10 ---  | 3.9 | 1.3 |
| YOR2Z SRL1   | 4.4 | 1.2 | YDR0Z HEM   | 3.5 | 1.5 | YNL19 -     | 3.8 | 2.2 | YDR5Z ---  | 3.9 | 1.3 |
| YLR21 COA4   | 4.4 | 1.8 | YFL06 SNOZ  | 3.5 | 1.4 | YKL08 SRX1  | 3.8 | 1.6 | YGL2E ---  | 3.9 | 1.3 |
| YLR35 BUD8   | 4.4 | 1.3 | YNL33 SNOZ  | 3.5 | 1.4 | YBR07 ECMI  | 3.8 | 2.4 | YGR2E ---  | 3.9 | 1.3 |
| YLR45 -      | 4.4 | 1.6 | YPL22 FLC1  | 3.5 | 1.5 | YBR2E -     | 3.8 | 1.5 | YHL04 ---  | 3.9 | 1.3 |
| YPL09 MSY1   | 4.4 | 1.3 | YEL06 SIT1  | 3.5 | 2.1 | YJR02 BNA1  | 3.8 | 2.2 | YIL117 PRM | 3.9 | 1.4 |
| YDR2Z BSC2   | 4.3 | 1.4 | YEL05 -     | 3.5 | 1.3 | YMR2Z ZDS1  | 3.8 | 1.2 | YMR1E SPG  | 3.9 | 1.3 |
| YJL08 SIP4   | 4.3 | 1.8 | YMR0U SPOZ  | 3.5 | 1.7 | YOR1Z AZF1  | 3.8 | 1.4 | --- ---    | 3.9 | 1.3 |
| YIL09Z FYV10 | 4.3 | 1.5 | YBR0E AKL1  | 3.5 | 1.3 | YPR0C CIT3  | 3.8 | 1.3 | YHL01 DUR  | 3.9 | 1.4 |
| YOL0E ARG1   | 4.3 | 2.2 | YJR01 ESS1  | 3.5 | 1.4 | YAL03 SNC   | 3.8 | 1.5 | YOR2E ---  | 3.9 | 1.4 |
| YBL07 -      | 4.3 | 1.3 | YMR0U PDSF  | 3.5 | 1.4 | YDR4C PDR   | 3.8 | 1.4 | --- ---    | 3.9 | 2.3 |
| YGR1C GTF1   | 4.3 | 1.3 | YEL01 UBCF  | 3.5 | 1.5 | YML0E AIM3  | 3.8 | 1.3 | YDR0C RCR  | 3.9 | 1.3 |
| YDL10 DUN1   | 4.3 | 1.2 | YHR0Z DOGZ  | 3.5 | 1.6 | YFR0Z PESZ  | 3.8 | 3.3 | YMR1C YPK  | 3.9 | 1.3 |
| YCR0C MRPL   | 4.3 | 1.3 | YKL08 SRX1  | 3.4 | 1.6 | YMR1C YPKZ  | 3.7 | 1.4 | YNL01 PBIZ | 3.9 | 1.9 |
| YHR0U DIA4   | 4.3 | 1.5 | YGL0E PKPZ  | 3.4 | 1.3 | YJL0Z RNRZ  | 3.7 | 1.4 | YDR2E SSD  | 3.9 | 1.2 |
| YMR2Z PGM3   | 4.3 | 1.5 | YGR0U -     | 3.4 | 1.8 | YPL13 ISU1  | 3.7 | 1.2 | YKL21 UBA  | 3.9 | 1.2 |
| YPR0Z MSF1   | 4.3 | 1.8 | YKL02 -     | 3.4 | 1.4 | YOR1Z MPCZ  | 3.7 | 1.7 | YDR3E ---  | 3.9 | 1.2 |
| YBR2Z -      | 4.3 | 1.7 | YOR1Z MPCZ  | 3.4 | 1.8 | YHL02 AIM1  | 3.7 | 2.8 | YBL10 ---  | 3.9 | 1.9 |
| YBR0C DSF2   | 4.3 | 1.4 | YOR0U TCB1  | 3.4 | 1.4 | YCR0E CSM   | 3.7 | 1.3 | YDR5Z ---  | 3.9 | 1.9 |
| YBR0C UGA2   | 4.3 | 1.3 | YDL01 GRXF  | 3.4 | 1.3 | YOL15 -     | 3.7 | 1.5 | YHR2Z ---  | 3.9 | 1.9 |
| YDR2Z ADR1   | 4.3 | 1.5 | YDR2Z UPCZ  | 3.4 | 1.5 | YNL32 KRE1  | 3.7 | 1.3 | YLL06 ---  | 3.9 | 1.9 |
| YGL0E -      | 4.3 | 1.7 | YLL02 SPAZ  | 3.4 | 1.5 | YGR1Z -     | 3.7 | 1.8 | YLR46 ---  | 3.9 | 1.9 |
| YOL0C MDM1   | 4.3 | 1.3 | YOR3E -     | 3.4 | 1.5 | YGL2C CHC   | 3.7 | 1.3 | YNL33 ---  | 3.9 | 1.9 |
| YBR1E ICS2   | 4.3 | 1.4 | YBL03 -     | 3.4 | 1.4 | YMR0C MIC1  | 3.7 | 1.2 | YNL15 NSG  | 3.9 | 1.1 |
| YLR16 UPS2   | 4.3 | 1.7 | YBR2Z HIS7  | 3.4 | 1.3 | YDR0E DOAZ  | 3.7 | 1.5 | YBR0E ---  | 3.8 | 1.5 |
| YGR2C TDA1C  | 4.2 | 2.1 | YDR5Z EUGZ  | 3.4 | 1.5 | YHR1E AIM1  | 3.7 | 1.7 | YBR2C ---  | 3.8 | 1.2 |
| YOR0Z RSB1   | 4.2 | 1.8 | YPL16 ATGZ  | 3.4 | 1.4 | YGR2E ENO   | 3.7 | 1.8 | YIR0Z ---  | 3.8 | 1.8 |
| YKL18 HYM1   | 4.2 | 1.2 | YML1C TSL1  | 3.4 | 2.2 | YKL14 MRPI  | 3.7 | 1.3 | YOL0E ATG  | 3.8 | 1.4 |
| YPL06 VPS2E  | 4.2 | 1.4 | YDL08 -     | 3.4 | 1.5 | YOR0U PET1  | 3.7 | 1.3 | YLR46 PAU  | 3.8 | 1.3 |
| YGR2E COQ6   | 4.2 | 1.7 | YKL03 PTM1  | 3.4 | 1.4 | YHR1Z MRPI  | 3.7 | 1.3 | YOL1E PAU  | 3.8 | 1.3 |
| YLR25 SYM1   | 4.2 | 2.1 | YHR1E KEL1  | 3.4 | 1.5 | YJL07Z PRYZ | 3.7 | 1.7 | YER1E ---  | 3.8 | 1.5 |
| YCR0Z SLM5   | 4.2 | 1.3 | YMR1Z -     | 3.4 | 1.3 | YMR1Z MRPI  | 3.7 | 1.4 | YCL04 SPS  | 3.8 | 1.9 |
| YNL13 -      | 4.2 | 2.1 | YHR0E KSP1  | 3.4 | 1.3 | YLR18 ATGZ  | 3.7 | 1.3 | YDL20 MGT  | 3.8 | 1.2 |
| YEL05 RML2   | 4.2 | 1.3 | YKL08 HOT1  | 3.4 | 1.4 | YLR00 -     | 3.7 | 1.5 | YNR0E ---  | 3.8 | 1.6 |
| YDR5Z ACN9   | 4.2 | 1.5 | YIL05E VHR1 | 3.3 | 1.3 | YML04 CATZ  | 3.7 | 1.5 | YLR0E ---  | 3.8 | 1.6 |
| YOL01 CMK2   | 4.2 | 1.5 | YER1Z VFA1  | 3.3 | 1.3 | YGR0U -     | 3.7 | 1.3 | YOR2Z DGA  | 3.8 | 1.2 |
| YOR1E MRPL   | 4.2 | 1.3 | YAR0Z UIP3  | 3.3 | 1.5 | YBL05 -     | 3.6 | 1.4 | YKL05 MDM  | 3.8 | 1.2 |
| YHR0C TDA3   | 4.2 | 1.5 | YBR2Z -     | 3.3 | 1.6 | YMR1E -     | 3.6 | 1.5 | --- ---    | 3.8 | 1.6 |
| YBR0C NTH2   | 4.2 | 1.5 | YAL06 SEO   | 3.3 | 1.6 | YDR4Z PPZZ  | 3.6 | 1.3 | YGR1Z ---  | 3.8 | 1.3 |
| YJR10 CPA2   | 4.2 | 1.3 | YMR1Z HOT1  | 3.3 | 1.3 | YNL07 MLFZ  | 3.6 | 1.4 | YAR0E FLO  | 3.8 | 1.3 |
| YIL07Z -     | 4.2 | 1.4 | YPL16 MLHZ  | 3.3 | 1.5 | YOR0C SGTZ  | 3.6 | 1.2 | YGR2Z MGA  | 3.8 | 1.8 |
| YML0Z YOX1   | 4.2 | 1.4 | YCR0C BPH1  | 3.3 | 1.3 | YER0E -     | 3.6 | 1.3 | YNL20 ---  | 3.8 | 1.7 |
| YGR2E COS6   | 4.2 | 1.4 | YPL09 SSU1  | 3.3 | 1.5 | YOR0C CRSZ  | 3.6 | 1.4 | YPR11 ---  | 3.8 | 1.3 |
| YDL06 COX9   | 4.2 | 1.3 | YJL06 MPM   | 3.3 | 1.6 | YPL02 SUVZ  | 3.6 | 1.3 | YIR0Z ---  | 3.8 | 1.3 |
| YCR0U SRD1   | 4.2 | 1.5 | YLR39 CCW   | 3.3 | 1.3 | YJL05Z BITZ | 3.6 | 1.3 | YFL05 ---  | 3.8 | 1.2 |
| YPL25 CLN2   | 4.2 | 1.5 | YBL10 -     | 3.3 | 1.4 | YKL10 -     | 3.6 | 1.4 | YMR2Z DFG  | 3.7 | 1.2 |
| YBR17 EHT1   | 4.2 | 1.5 | YCL01 -     | 3.3 | 1.4 | YDR0E YOSZ  | 3.6 | 1.2 | YNL30 ---  | 3.7 | 1.5 |
| YIR0U SGN1   | 4.2 | 1.2 | YDR0E -     | 3.3 | 1.4 | YGR2E TNA1  | 3.6 | 1.4 | YOR1Z ---  | 3.7 | 1.2 |
| YDR0C RCR2   | 4.2 | 1.2 | YDR0E -     | 3.3 | 1.4 | YPR1E TPOZ  | 3.6 | 1.3 | YML0Z CAT  | 3.7 | 1.4 |
| YJR04 VPS5E  | 4.2 | 1.3 | YDR2Z -     | 3.3 | 1.4 | YML07 DAK1  | 3.6 | 1.4 | YKL19 MIAZ | 3.7 | 1.1 |
| YAL02 MYO4   | 4.1 | 1.2 | YDR2Z -     | 3.3 | 1.4 | YPL06 -     | 3.6 | 1.4 | YJL10 MEF  | 3.7 | 1.3 |
| YKL12 SSH4   | 4.1 | 1.5 | YDR3E -     | 3.3 | 1.4 | YHR0C STPZ  | 3.6 | 1.2 | YDR0E ---  | 3.7 | 1.2 |
| YER1E RAD4   | 4.1 | 1.5 | YFL00 -     | 3.3 | 1.4 | YKR0E GPTZ  | 3.6 | 1.5 | YOR1Z ---  | 3.7 | 1.5 |
| YLR45 -      | 4.1 | 1.2 | YGR0E -     | 3.3 | 1.4 | YMR1C SRT1  | 3.6 | 1.9 | --- ---    | 3.7 | 1.4 |
| YLR25 NDL1   | 4.1 | 1.2 | YGR1E -     | 3.3 | 1.4 | YLR28 GUF   | 3.6 | 1.2 | YAR0Z UIP3 | 3.7 | 1.3 |
| YIR0U -      | 4.1 | 1.7 | YJR02 -     | 3.3 | 1.4 | YJR13 TIM8  | 3.6 | 1.2 | YLR27 PIG1 | 3.7 | 1.5 |
| YER0E HOR2   | 4.1 | 2.2 | YLR22 -     | 3.3 | 1.4 | YDL16 SFA1  | 3.6 | 1.2 | YJL16 ---  | 3.7 | 1.6 |
| YHR1E MDM3   | 4.1 | 1.4 | YLR41 -     | 3.3 | 1.4 | YLR07 -     | 3.6 | 1.3 | YNR0E BIOZ | 3.7 | 1.1 |
| YBR1Z YSW1   | 4.1 | 1.5 | YOR1E -     | 3.3 | 1.4 | YCR0Z SLMZ  | 3.6 | 1.3 | YEL07 DLD  | 3.7 | 1.2 |
| YML1C CUE4   | 4.1 | 1.4 | YOR3E -     | 3.3 | 1.4 | YGL13 ITC1  | 3.6 | 1.3 | YOL1E ---  | 3.7 | 2.1 |
| YOR2Z WTM1   | 4.1 | 2.0 | YPR1Z -     | 3.3 | 1.4 | YIR0U -     | 3.6 | 1.7 | YDL02 DIA3 | 3.7 | 1.5 |
| YBL00 -      | 4.1 | 1.4 | YML0C -     | 3.3 | 1.5 | YPL17 MRPI  | 3.6 | 1.3 | --- ---    | 3.6 | 1.3 |
| YBR01 -      | 4.1 | 1.4 | YNL04 LAP2  | 3.3 | 1.3 | YLR40 SFP1  | 3.6 | 1.2 | YNL10 LEU  | 3.6 | 1.2 |
| YDR3Z -      | 4.1 | 1.4 | YER0C CHZ1  | 3.3 | 1.4 | YCL03 ATGZ  | 3.6 | 1.3 | YOL04 ---  | 3.6 | 1.4 |
| YER1E -      | 4.1 | 1.4 | YLR17 -     | 3.3 | 1.4 | YEL02 -     | 3.6 | 1.3 | --- ---    | 3.6 | 1.4 |

|              |     |     |             |     |     |            |     |     |               |      |     |
|--------------|-----|-----|-------------|-----|-----|------------|-----|-----|---------------|------|-----|
| YGR0:-       | 4.1 | 1.4 | YGR1:-      | 3.3 | 1.5 | YER1C NUP- | 3.6 | 1.3 | YHR1E GND     | 3.6  | 1.2 |
| YGR1(-       | 4.1 | 1.4 | YKL06 BLI1  | 3.3 | 1.5 | YMR2I MRPI | 3.6 | 1.2 | YBR1E KTR-    | 3.6  | 1.2 |
| YHR2:-       | 4.1 | 1.4 | YGR0- RME-  | 3.3 | 1.6 | YBR0E -    | 3.6 | 1.5 | YKL14 TGL-    | 3.6  | 1.2 |
| YJR02 -      | 4.1 | 1.4 | YJL16(-     | 3.2 | 1.6 | YLR08 EMP- | 3.5 | 1.8 | YLR03 DAN     | 3.6  | 1.2 |
| YLR03 -      | 4.1 | 1.4 | YDL09 PMT-  | 3.2 | 1.5 | YOL0E CRT1 | 3.5 | 1.3 | YLL01 BPT     | 3.6  | 1.2 |
| YML0-        | 4.1 | 1.4 | YKL15 -     | 3.2 | 1.8 | YOR2E SNF2 | 3.5 | 1.2 | YDL13 CDC     | 3.6  | 1.1 |
| YMR0- -      | 4.1 | 1.4 | YBR07 SLM4  | 3.2 | 1.4 | YAR0Z PAU7 | 3.5 | 1.5 | YFL02 GAT     | 3.6  | 1.4 |
| YMR0:-       | 4.1 | 1.4 | YDR3E TCM-  | 3.2 | 1.4 | YOL1C PKH2 | 3.5 | 1.2 | YNL05 ---     | 3.6  | 1.3 |
| YNL28 -      | 4.1 | 1.4 | YMR1I CTL1  | 3.2 | 1.3 | YGR1E CCM  | 3.5 | 1.2 | YBR11RAD      | 3.6  | 1.3 |
| YOR1- -      | 4.1 | 1.4 | YOL11 -     | 3.2 | 1.4 | YPL08 SEC1 | 3.5 | 1.3 | YER07 ---     | 3.6  | 1.7 |
| YPR1E -      | 4.1 | 1.4 | YMR0I MVP-  | 3.2 | 1.3 | YGR1- SHY1 | 3.5 | 1.7 | --- ---       | 3.6  | 1.3 |
| YPR1E -      | 4.1 | 1.4 | YOL1C PKH2  | 3.2 | 1.4 | YBL00 -    | 3.5 | 1.3 | YKR0- FMP     | 3.6  | 1.3 |
| YPL26 -      | 4.1 | 1.8 | YLR27 DCS1  | 3.2 | 1.6 | YBL00 -    | 3.5 | 1.3 | --- ---       | 3.5  | 2.3 |
| YPL18 MRN1   | 4.1 | 1.3 | YNL23 LAP3  | 3.2 | 1.4 | YDR17 -    | 3.5 | 1.3 | YKR0E KTR-    | 3.5  | 1.2 |
| YAR0Z -      | 4.1 | 1.4 | YDL05 USO-  | 3.2 | 1.5 | YMR0- -    | 3.5 | 1.3 | --- ---       | 3.5  | 1.3 |
| YBR0E -      | 4.1 | 1.6 | YBL00 ECM-  | 3.2 | 1.3 | YMR0- -    | 3.5 | 1.3 | --- ---       | 3.5  | 1.3 |
| YPL20 TPK2   | 4.1 | 1.5 | YHR1E SPO-  | 3.2 | 1.5 | YNL28 -    | 3.5 | 1.3 | YPL15 PRM     | 3.5  | 1.3 |
| YHL04 COS8   | 4.1 | 1.9 | YJR14 -     | 3.2 | 1.4 | YNL28 -    | 3.5 | 1.3 | YBL10 ---     | 3.5  | 1.2 |
| YIL087 AIM19 | 4.1 | 1.7 | YNL29 MON-  | 3.2 | 1.2 | YMR1E RGM  | 3.5 | 1.4 | YER1E ---     | 3.5  | 1.2 |
| YHL00 MRP4   | 4.1 | 1.5 | YLR21 FRE1  | 3.2 | 1.3 | YNL18 NPR- | 3.5 | 1.3 | YOR1E ---     | 3.5  | 1.2 |
| YLR25 HAP1   | 4.1 | 1.3 | YKL10 GFA1  | 3.2 | 1.3 | YBL08 PET1 | 3.5 | 1.4 | --- ---       | 3.5  | 1.3 |
| YDR3(-       | 4.1 | 1.4 | YNL05 ARP-  | 3.2 | 1.3 | YGL01 PDR- | 3.5 | 1.3 | YGR2- ---     | 3.5  | 1.3 |
| YOR0E VHS3   | 4.1 | 1.3 | YML0C -     | 3.2 | 1.3 | YGL05 PKP2 | 3.5 | 1.3 | YDR0E TGL-    | 3.5  | 1.3 |
| YKL14 TGL1   | 4.1 | 1.3 | YOR3E RDR-  | 3.2 | 1.3 | YHR1E -    | 3.5 | 1.5 | --- ---       | 3.5  | 1.3 |
| YIL04E PKP1  | 4.1 | 1.4 | YOR2- MCT-  | 3.2 | 1.6 | YNL24 CWC  | 3.5 | 1.2 | YBR1E TPS     | 3.5  | 1.5 |
| YHR0E RRF1   | 4.1 | 1.3 | YPL17 DAP1  | 3.2 | 1.6 | YLR27 DCS- | 3.5 | 1.6 | --- ---       | 3.5  | 1.3 |
| YGL0E MMS2   | 4.0 | 1.4 | YLR20 ENT2  | 3.2 | 1.4 | YOR3E PDR- | 3.5 | 1.3 | YHR0E RSC     | 3.5  | 1.3 |
| YML0E GAL8C  | 4.0 | 1.2 | YBR07 HSP2  | 3.2 | 3.8 | YKR0C MRPI | 3.5 | 1.4 | YHR0E RSC     | 3.5  | 1.3 |
| YGR2- -      | 4.0 | 1.4 | YBR21 SDS2  | 3.2 | 1.9 | YDR1- DOP- | 3.5 | 1.3 | YGR2E KEL-    | 3.5  | 1.2 |
| YKL03 UGP1   | 4.0 | 1.4 | YDL06 IDP1  | 3.2 | 1.3 | YBR2E AIM5 | 3.5 | 1.3 | YMR0E AAC     | 3.5  | 1.3 |
| YIL037 PRM2  | 4.0 | 1.8 | YOR3E MYO-  | 3.2 | 1.3 | YBR01 KAP1 | 3.5 | 1.1 | YML0Z TSA-    | 3.5  | 1.1 |
| YGL04 RIM8   | 4.0 | 1.2 | YFL06 COS-  | 3.2 | 1.3 | YGR1E MEP- | 3.5 | 1.4 | YBR21 SDS     | 3.5  | 1.8 |
| YDR3E -      | 4.0 | 1.7 | YGR2E COS-  | 3.2 | 1.3 | YJR10 RSM- | 3.5 | 1.3 | YPL12 RNY     | 3.4  | 1.7 |
| YKR0- FMP4E  | 4.0 | 1.5 | YNL33 COS-  | 3.2 | 1.3 | YKL15 RSM- | 3.5 | 1.2 | YAL02 FRT-    | 3.4  | 1.4 |
| YPROC AIM45  | 4.0 | 1.3 | YNR0C DSE-  | 3.1 | 1.4 | YOL15 HPF1 | 3.5 | 1.8 | YHR1E YAP     | 3.4  | 1.2 |
| YHR1C GRE3   | 4.0 | 1.7 | YML07 HMG   | 3.1 | 1.3 | YER0E ARG- | 3.5 | 1.3 | YDL02 ---     | 3.4  | 1.3 |
| YGR2E SCW4   | 4.0 | 1.2 | YOL1E -     | 3.1 | 1.8 | YLR33 VRP1 | 3.5 | 1.4 | YLR32 ---     | 3.4  | 1.2 |
| YKL12 DGR2   | 4.0 | 1.6 | YNL30 BXI1  | 3.1 | 1.5 | YDR1E KIN1 | 3.5 | 1.4 | YNL15 ---     | 3.4  | 1.2 |
| YER07 ICP55  | 4.0 | 1.3 | YJL03 IRC1- | 3.1 | 1.7 | YMR0- -    | 3.5 | 1.7 | YKR0E GPT     | 3.4  | 1.4 |
| YML0E AIM32  | 4.0 | 1.3 | YMR0I ADH-  | 3.1 | 1.3 | YLR39 ATP1 | 3.4 | 1.6 | YLR09 SUL-    | 3.4  | 1.4 |
| YKR0C MRPL-  | 4.0 | 1.4 | YBL00 SLA1  | 3.1 | 1.3 | YKL21 OXP- | 3.4 | 1.2 | YBR2E ---     | 3.4  | 1.3 |
| YAR0Z UIP3   | 4.0 | 1.4 | YJR15 DAL5  | 3.1 | 1.6 | YMR1E GCV- | 3.4 | 1.8 | YOL11 SKM     | 3.4  | 1.5 |
| YOR1E ISN1   | 4.0 | 1.4 | YBL04 EDE1  | 3.1 | 1.3 | YGR0E MSP- | 3.4 | 1.3 | YIR0Z DAL-    | 3.4  | 1.2 |
| YNL08 SWS2   | 4.0 | 1.4 | YJL05 TDH1  | 3.1 | 2.0 | YMR0E ATP2 | 3.4 | 1.3 | YOR3E ---     | 3.4  | 1.5 |
| YLR16 PUS5   | 4.0 | 1.5 | YLR34 -     | 3.1 | 1.4 | YDL23 GUD- | 3.4 | 1.5 | YGR1E GTO     | 3.4  | 1.2 |
| YPR07 OPY2   | 4.0 | 1.4 | YAL03 FUN1  | 3.1 | 1.3 | YPL07 UBP1 | 3.4 | 1.3 | --- ---       | 3.4  | 1.2 |
| YPL20 PGC1   | 4.0 | 1.2 | YPL12 RNY1  | 3.1 | 1.8 | YKL19 ACP1 | 3.4 | 1.4 | YDL22 FMP     | 3.4  | 2.2 |
| YPL14 MKK2   | 4.0 | 1.3 | YKL19 PTK1  | 3.1 | 1.4 | YDR01 GCV- | 3.4 | 1.8 | YDL02 RPN     | 3.4  | 1.2 |
| YML1E ERO1   | 4.0 | 1.2 | YDR1E ARO-  | 3.1 | 1.3 | YMR1- -    | 3.4 | 1.2 | --- ---       | 3.4  | 1.5 |
| YAR0C -      | 4.0 | 1.5 | YOR2E WTM   | 3.1 | 1.9 | YAL06 SEO- | 3.4 | 1.5 | YMR0E YTA-    | 3.4  | 1.2 |
| YBL00 -      | 4.0 | 1.5 | YJR00 APL1  | 3.1 | 1.3 | YGR1- -    | 3.4 | 1.6 | YMR1E ---     | 3.4  | 1.1 |
| YBR01 -      | 4.0 | 1.5 | YMR1- -     | 3.1 | 1.5 | YLR20 QRI5 | 3.4 | 1.3 | YER0- ACA     | 3.4  | 1.3 |
| YER1E -      | 4.0 | 1.5 | YNL07 MLF3  | 3.1 | 1.4 | YBR1C AIM3 | 3.4 | 1.5 | YDR4E MFA ### | 0.6  |     |
| YGR0:-       | 4.0 | 1.5 | YIR00 MSL1  | 3.1 | 1.2 | YGR0E PDC- | 3.4 | 1.5 | YGL0Z SCV ### | 0.6  |     |
| YGR1(-       | 4.0 | 1.5 | YKL15 APE2  | 3.1 | 1.4 | YEL04 -    | 3.4 | 1.5 | YLR06 ---     | -8.8 | 0.7 |
| YJR02 -      | 4.0 | 1.5 | YGL0E -     | 3.1 | 1.3 | YDR0E MIC1 | 3.4 | 1.6 | YMR2E RIT1    | -8.5 | 0.8 |
| YJR02 -      | 4.0 | 1.5 | YPR1E CTR1  | 3.1 | 1.2 | YKL14 SDH- | 3.4 | 1.5 | YPL13 RDS     | -8.4 | 0.8 |
| YLR15 -      | 4.0 | 1.5 | YOL0E THI2  | 3.1 | 1.3 | YNL31 ZIM1 | 3.4 | 1.3 | YDR4E SNM     | -7.9 | 0.7 |
| YML0E -      | 4.0 | 1.5 | YBR0E REG-  | 3.0 | 1.4 | YIL134 -   | 3.4 | 1.4 | YNL14 AAH     | -7.9 | 0.7 |
| YMR0- -      | 4.0 | 1.5 | YNL15 NSG-  | 3.0 | 1.2 | YJL05(-    | 3.4 | 1.2 | YML0E ---     | -7.6 | 0.8 |
| YNL28 -      | 4.0 | 1.5 | YGL07 RCS1  | 3.0 | 1.4 | YBR2E -    | 3.4 | 1.3 | YLR45 SST-    | -7.6 | 0.5 |
| YOL1C -      | 4.0 | 1.5 | YER0Z GPA-  | 3.0 | 1.3 | YKL07 SMY- | 3.4 | 1.2 | YHR1E THP-    | -7.5 | 0.7 |
| YOR1- -      | 4.0 | 1.5 | YMR1- -     | 3.0 | 1.4 | YOR2E WTM  | 3.4 | 1.9 | YGL2E ADH     | -7.3 | 0.8 |
| YPL25 -      | 4.0 | 1.5 | YNL27 SEC2  | 3.0 | 1.3 | YGR1- -    | 3.4 | 1.3 | YOR1C RAS     | -7.2 | 0.7 |
| YIL09E SGA1  | 4.0 | 1.3 | YDR5E SLF1  | 3.0 | 1.2 | YEL05 RML2 | 3.4 | 1.3 | YDR4E ---     | -7.2 | 0.8 |
| YDL11 -      | 4.0 | 1.6 | YHL03 VMR-  | 3.0 | 1.7 | YHR1E DNA- | 3.4 | 1.2 | YDL20 TRM     | -7.0 | 0.8 |
| YLR28 -      | 4.0 | 2.1 | YBR0Z SCO-  | 3.0 | 1.3 | YDL03 GPR- | 3.4 | 1.1 | YBR0E ---     | -7.0 | 0.7 |
| YNL18 MRPL-  | 4.0 | 1.3 | YLR13 USB1  | 3.0 | 1.4 | YPR17 -    | 3.3 | 1.7 | YOR2E STE-    | -6.9 | 0.8 |
| YDR2E SSD1   | 4.0 | 1.3 | YAL04 GCV-  | 3.0 | 1.5 | YOR3E HAP- | 3.3 | 1.3 | YLR39 AFG     | -6.8 | 0.7 |
| YMR2E TPS3   | 4.0 | 1.3 | YIR03 DAL7  | 3.0 | 1.4 | YJR08 -    | 3.3 | 1.3 | YDR2E ---     | -6.8 | 0.8 |
| YOR0- ROD1   | 4.0 | 1.4 | YLR46 PAU-  | 3.0 | 1.3 | YMR1E AIM3 | 3.3 | 1.4 | YBR2E ---     | -6.8 | 0.7 |

|             |     |     |              |     |     |             |     |     |             |      |     |
|-------------|-----|-----|--------------|-----|-----|-------------|-----|-----|-------------|------|-----|
| YOR1: CAT5  | 4.0 | 1.6 | YOL1: PAU4   | 3.0 | 1.3 | YJL04: MHP  | 3.3 | 1.4 | YER1: DSE   | -6.7 | 0.7 |
| YDR4: PEX2  | 4.0 | 1.3 | YHR1: AIM4   | 3.0 | 1.3 | YIL07: MAM  | 3.3 | 1.4 | YJL21: OPT  | -6.7 | 0.8 |
| YBR11: MUD1 | 4.0 | 1.2 | YAL03: CYC3  | 3.0 | 1.4 | YBL00: HIR1 | 3.3 | 1.2 | YHL00: YAP  | -6.7 | 0.8 |
| YHR1: -     | 4.0 | 1.3 | YLR12: -     | 3.0 | 1.4 | YNL29: MON  | 3.3 | 1.2 | YNL21: RAP  | -6.7 | 0.8 |
| YER0: ZRG8  | 4.0 | 1.9 | YGR1: SYF2   | 3.0 | 1.4 | YMR2: PRC   | 3.3 | 1.4 | YER1: ---   | -6.6 | 0.7 |
| YAL03: CYC3 | 4.0 | 1.3 | YLL02: FRA1  | 3.0 | 1.4 | YML11: COQ  | 3.3 | 1.3 | YER17: GRX  | -6.6 | 0.7 |
| YDL01: OSH2 | 3.9 | 1.4 | YDR4: ADE    | 3.0 | 1.3 | YGR1: -     | 3.3 | 1.4 | YMR1: SAS   | -6.6 | 0.8 |
| YCL03: GID7 | 3.9 | 1.4 | YBR11: LYS2  | 3.0 | 1.3 | YML1: NUP   | 3.3 | 1.2 | YIL01: BAR  | -6.3 | 0.6 |
| YOR1: GCY1  | 3.9 | 1.3 | YER1: COX    | 3.0 | 1.5 | YGR17: MSM  | 3.3 | 1.2 | YPL18: ---  | -6.3 | 0.8 |
| YKL17: STE3 | 3.9 | 1.7 | YKL04: DCW   | 3.0 | 1.3 | YMR1: GAT2  | 3.3 | 1.6 | YHR1: FUR   | -6.3 | 0.8 |
| YBL06: KIP1 | 3.9 | 1.2 | YBL05: PIN4  | 3.0 | 1.5 | YMR2: PGM   | 3.3 | 1.3 | YHR0: MED   | -6.2 | 0.8 |
| YJR11: JHD2 | 3.9 | 1.7 | YOR0: -      | 3.0 | 1.3 | YPR04: MSF  | 3.3 | 1.6 | YGL15: CDC  | -6.0 | 0.8 |
| YIL05: VHR1 | 3.9 | 1.2 | YBR12: RTC2  | 3.0 | 2.2 | YNL16: CBK1 | 3.3 | 1.2 | YHR0: FSH   | -6.0 | 0.7 |
| YKR01: TOF2 | 3.9 | 1.3 | YNL22: ADE1  | 3.0 | 1.2 | YLR12: YPS3 | 3.3 | 1.5 | YMR1: ---   | -6.0 | 0.8 |
| YBL00: -    | 3.9 | 1.4 | YNL00: IDP3  | 3.0 | 1.4 | YPR04: PUF2 | 3.3 | 1.3 | YLR14: ---  | -6.0 | 0.8 |
| YDR2: -     | 3.9 | 1.4 | YCR0: NPP1   | 3.0 | 1.3 | YHR0: FYV4  | 3.3 | 1.3 | YBR2: TSC   | -6.0 | 0.7 |
| YDR3: -     | 3.9 | 1.4 | YPL15: -     | 3.0 | 1.3 | YOR0: TIR4  | 3.3 | 1.3 | YMR1: RRB   | -5.9 | 0.8 |
| YGR0: -     | 3.9 | 1.4 | YGR0: NMA    | 3.0 | 1.2 | YDR01: -    | 3.3 | 1.7 | YGL10: ---  | -5.9 | 0.7 |
| YJR02: -    | 3.9 | 1.4 | YBR1: IRA1   | 2.9 | 1.3 | YPL09: MGR  | 3.3 | 1.3 | YKL11: ABF  | -5.8 | 0.8 |
| YMR0: -     | 3.9 | 1.4 | YBR1: VID2   | 2.9 | 1.3 | YLR42: TUS1 | 3.3 | 1.3 | YJL15: FAR  | -5.8 | 0.6 |
| YNL28: -    | 3.9 | 1.4 | YOR3: MCH    | 2.9 | 1.5 | YBR14: RTC2 | 3.3 | 2.4 | YGR0: ---   | -5.8 | 0.8 |
| YDR2: PAM1  | 3.9 | 1.4 | YPR1: GPH    | 2.9 | 1.9 | YAL04: GCV  | 3.3 | 1.4 | YGR0: ---   | -5.8 | 0.7 |
| YMR2: -     | 3.9 | 1.6 | YMR0: -      | 2.9 | 1.6 | YKL21: DOA  | 3.3 | 1.3 | YJR07: LIA1 | -5.7 | 0.7 |
| YMR0: FAR3  | 3.9 | 1.3 | YPR11: -     | 2.9 | 1.3 | YPL12: RNY  | 3.3 | 1.8 | YDL03: PUS  | -5.7 | 0.8 |
| YJR07: MIR1 | 3.9 | 1.3 | YGR2: YTA7   | 2.9 | 1.2 | YJL17: CPS1 | 3.3 | 1.4 | YDR3: SAC   | -5.7 | 0.8 |
| YBR0: NHP6  | 3.9 | 1.2 | YFR0: -      | 2.9 | 1.2 | YDR3: -     | 3.3 | 1.5 | YGR2: TNA   | -5.6 | 0.8 |
| YBR0: NHP6  | 3.9 | 1.2 | YBR0: NHP    | 2.9 | 1.2 | YLR05: -    | 3.3 | 1.4 | YNL07: NIS1 | -5.6 | 0.6 |
| YCR0: SOL2  | 3.9 | 1.4 | YBR0: NHP    | 2.9 | 1.2 | YLR24: VPS3 | 3.3 | 1.3 | YDR0: RLI1  | -5.6 | 0.8 |
| YGR2: FMP4  | 3.9 | 1.7 | YDR1: -      | 2.9 | 1.3 | YDR3: TCM   | 3.3 | 1.3 | YOR3: ---   | -5.6 | 0.8 |
| YOR3: MSC6  | 3.9 | 1.4 | YNL14: ALF1  | 2.9 | 1.3 | YGR2: CIR1  | 3.3 | 1.3 | --- ---     | -5.6 | 0.7 |
| YGR2: RAD2  | 3.9 | 1.3 | YCL01: SGF2  | 2.9 | 1.4 | YLR44: -    | 3.3 | 1.8 | YPL25: HF11 | -5.6 | 0.8 |
| YOR1: IES4  | 3.9 | 1.3 | YLR02: ADE1  | 2.9 | 1.2 | YJL03: KAR2 | 3.2 | 1.2 | YNL02: ---  | -5.6 | 0.8 |
| YMR1: SPG5  | 3.9 | 1.3 | YNL27: BNI1  | 2.9 | 1.2 | YHR0: -     | 3.2 | 1.4 | YLR32: NMA  | -5.5 | 0.8 |
| YGR0: ROM1  | 3.9 | 1.4 | YOR3: FRE5   | 2.9 | 3.0 | YJL12: PBS2 | 3.2 | 1.2 | YIL10: SHQ  | -5.5 | 0.8 |
| YER0: HMF1  | 3.9 | 1.2 | YBR0: -      | 2.9 | 1.5 | YBR21: SDS2 | 3.2 | 2.0 | YBR0: ORC   | -5.5 | 0.8 |
| YDR5: EMI2  | 3.9 | 1.8 | YBR0: NHP    | 2.9 | 1.3 | YDR51: GRX  | 3.2 | 1.2 | YDR2: SNU   | -5.5 | 0.7 |
| YLR39: ART1 | 3.9 | 1.3 | YLR43: CAR2  | 2.9 | 1.4 | YLR35: -    | 3.2 | 1.3 | YGL20: MCM  | -5.5 | 0.8 |
| YLR35: ATG3 | 3.9 | 1.9 | YJL14: YAK1  | 2.9 | 1.3 | YHR0: TRA1  | 3.2 | 1.3 | YOR2: DSE   | -5.5 | 0.7 |
| YML11: -    | 3.9 | 1.2 | YHR0: MYO    | 2.9 | 1.5 | YDR47: JIP4 | 3.2 | 1.5 | YOL12: ---  | -5.4 | 0.8 |
| YBL09: SCS2 | 3.9 | 1.5 | YDR2: -      | 2.9 | 1.3 | YGL22: MTC  | 3.2 | 1.3 | YOR3: SFG   | -5.4 | 0.7 |
| YBL04: COR1 | 3.9 | 1.5 | YBR0: EDS1   | 2.9 | 2.7 | YLR09: MIM2 | 3.2 | 1.3 | YDL15: CLB  | -5.4 | 0.8 |
| YHR1: -     | 3.9 | 1.4 | YOL0: ATG1   | 2.9 | 1.4 | YLR13: RKM  | 3.2 | 1.3 | YHL01: PRS  | -5.4 | 0.8 |
| YPL25: ICY2 | 3.8 | 1.6 | YIR00: PAN1  | 2.9 | 1.3 | YGR17: -    | 3.2 | 1.9 | YNL11: DBP  | -5.4 | 0.7 |
| YCR0: ERS1  | 3.8 | 1.5 | YDL09: UBX3  | 2.9 | 1.4 | YOR2: MRM   | 3.2 | 1.2 | YKR0: UTP   | -5.3 | 0.7 |
| YJL20: NCE1 | 3.8 | 1.5 | YLR03: DAN2  | 2.9 | 1.2 | YBR2: FMP2  | 3.2 | 1.3 | YOR2: DFR   | -5.3 | 0.8 |
| YOR3: -     | 3.8 | 1.5 | YGR0: STF2   | 2.9 | 1.8 | YJR08: EAF6 | 3.2 | 1.2 | YBR1: TAF   | -5.3 | 0.8 |
| YPL27: -    | 3.8 | 1.5 | YOR1: PIN2   | 2.9 | 1.3 | YPL16: REV3 | 3.2 | 1.3 | YHR0: TRM   | -5.3 | 0.7 |
| YMR0: -     | 3.8 | 1.7 | YGR1: VPS6   | 2.9 | 1.2 | YLR41: VIP1 | 3.2 | 1.2 | YPL03: ---  | -5.2 | 0.8 |
| YNL22: ATG4 | 3.8 | 1.4 | YMR0: VBA1   | 2.9 | 1.2 | YBL03: STU1 | 3.2 | 1.2 | YHR17: NMD  | -5.2 | 0.8 |
| YBR2: AIM5  | 3.8 | 1.4 | YLR03: -     | 2.9 | 1.3 | YNL19: DUG  | 3.2 | 1.3 | YGR2: BUD   | -5.2 | 0.8 |
| YLR05: OSW2 | 3.8 | 1.5 | YLL01: YEH1  | 2.9 | 1.5 | YNR0: FPK1  | 3.2 | 1.4 | YMR2: ---   | -5.2 | 0.6 |
| YNR0: SSK2  | 3.8 | 1.2 | YPR1: SGE1   | 2.9 | 1.3 | YMR3: ADH   | 3.2 | 1.2 | YHR0: ---   | -5.2 | 0.7 |
| YEL04: -    | 3.8 | 1.5 | YIL101: XBP1 | 2.9 | 1.9 | YEL01: MMS  | 3.2 | 1.7 | YJR06: RPA  | -5.2 | 0.8 |
| YHR0: ARG4  | 3.8 | 1.4 | YMR0: CSI1   | 2.9 | 1.3 | YER07: RNR  | 3.2 | 1.3 | YMR0: MAC   | -5.2 | 0.8 |
| YLR21: MSC3 | 3.8 | 1.3 | YOR1: IAH1   | 2.9 | 1.3 | YHL02: RIM1 | 3.2 | 1.2 | YNL06: SUN  | -5.1 | 0.8 |
| YGR2: GND2  | 3.8 | 1.5 | YLR37: STP3  | 2.9 | 1.2 | YOR3: PDE2  | 3.2 | 1.5 | YIR00: PRI1 | -5.1 | 0.7 |
| YOR3: RDR1  | 3.8 | 1.2 | YJR07: MOG   | 2.9 | 1.3 | YHR0: YHK   | 3.2 | 1.4 | YGL1: SUT   | -5.1 | 0.8 |
| YBL04: EDE1 | 3.8 | 1.4 | YDL11: ATG2  | 2.9 | 1.4 | YGL02: SCW  | 3.2 | 1.3 | YBL06: PRS  | -5.1 | 0.8 |
| YBR0: UBC4  | 3.8 | 1.2 | YBR2: MCX    | 2.9 | 1.3 | YML0: NTE1  | 3.2 | 1.3 | YPL19: ---  | -5.1 | 0.8 |
| YIR03: HYR1 | 3.8 | 1.5 | YIR00: AIM2  | 2.9 | 1.3 | YMR3: DIA1  | 3.2 | 1.3 | YNL32: EGT  | -5.1 | 0.8 |
| YLR40: BLS1 | 3.8 | 1.3 | YKR1: SIR1   | 2.9 | 1.3 | YLR02: IRC2 | 3.2 | 1.3 | YMR3: ---   | -5.1 | 0.7 |
| YLR20: COQ9 | 3.8 | 1.5 | YJL00: CYR1  | 2.9 | 1.3 | YOR0: STI1  | 3.2 | 1.3 | YBR0: REB   | -5.1 | 0.8 |
| YBR0: NHP6  | 3.8 | 1.3 | YMR3: -      | 2.9 | 1.6 | YLR38: NAM  | 3.2 | 1.2 | YOR3: VTS   | -5.0 | 0.6 |
| YLR00: -    | 3.8 | 1.5 | YOR2: RCN2   | 2.8 | 1.4 | YPL20: PGC  | 3.2 | 1.2 | YPL13: UME  | -5.0 | 0.8 |
| YLR03: COX1 | 3.8 | 1.4 | YMR0: ERG    | 2.8 | 1.3 | YIR00: MPH  | 3.2 | 1.3 | YLR40: SFP  | -5.0 | 0.8 |
| YMR0: MSS1  | 3.8 | 1.4 | YEL04: YEF1  | 2.8 | 1.5 | YDR31: HIM1 | 3.2 | 1.4 | YKL01: SWL  | -5.0 | 0.8 |
| YDL24: AAD4 | 3.8 | 1.5 | YIR01: -     | 2.8 | 1.4 | YOR1: MRPI  | 3.2 | 1.3 | YDR3: HPT   | -5.0 | 0.7 |
| YNL07: TPM1 | 3.8 | 1.2 | YLR2: LCB5   | 2.8 | 1.3 | YKR0: CCP   | 3.2 | 1.4 | YJL19: PHO  | -5.0 | 0.8 |
| YIL04: APQ1 | 3.8 | 1.1 | YJR14: BAT2  | 2.8 | 1.8 | YGR0: PEX   | 3.2 | 1.2 | YLR28: CTS  | -5.0 | 0.7 |
| YBR1: CBP6  | 3.7 | 1.3 | YJR04: ANB1  | 2.8 | 2.4 | YBR0: -     | 3.2 | 1.4 | YDL22: HO   | -5.0 | 0.8 |
| YPR1: NCE1  | 3.7 | 1.2 | YJL21: -     | 2.8 | 1.4 | YIL07: SPO  | 3.1 | 1.8 | YPL10: ELP  | -5.0 | 0.7 |

|             |     |     |             |     |     |             |      |     |            |      |     |
|-------------|-----|-----|-------------|-----|-----|-------------|------|-----|------------|------|-----|
| YLR15 PCD1  | 3.7 | 1.4 | YIL114 POR2 | 2.8 | 1.4 | YBR1E MBA   | 3.1  | 1.4 | YPL08 ELP  | -5.0 | 0.8 |
| YJR03 PET19 | 3.7 | 1.5 | YBL01 ACH1  | 2.8 | 1.4 | YEL02 TIM9  | 3.1  | 1.4 | YGL0E LSG  | -5.0 | 0.8 |
| YOR3 NDD1   | 3.7 | 1.4 | YIL087 AIM1 | 2.8 | 1.5 | YML0E AMD   | 3.1  | 1.2 | YGR0 BUD   | -5.0 | 0.7 |
| YOR0 TIR4   | 3.7 | 1.5 | YDR1E STB3  | 2.8 | 1.3 | YIL047 SYG  | 3.1  | 1.2 | YNL06 GCD  | -5.0 | 0.8 |
| YGR1 PEX4   | 3.7 | 1.5 | YDR0 SNF1   | 2.8 | 1.3 | YIL047 SYG  | 3.1  | 1.2 | YOR1 ---   | -5.0 | 0.8 |
| YOR1 CRC1   | 3.7 | 2.4 | YBR2E SRB6  | 2.8 | 1.2 | YIL06E RNR  | 3.1  | 1.6 | YOL02 DIS3 | -4.9 | 0.9 |
| YDL19 GGC1  | 3.7 | 1.2 | YDR4E CWC   | 2.8 | 1.3 | YEL04 -     | 3.1  | 1.2 | YNL31 ---  | -4.9 | 0.8 |
| YER0E PET11 | 3.7 | 1.6 | YHR17 STB5  | 2.8 | 1.4 | YHR0E RRM   | 3.1  | 1.3 | YBR27 ---  | -4.9 | 0.7 |
| YGR0 -      | 3.7 | 1.3 | YNR0E LRO1  | 2.8 | 1.3 | YGL0E SPC1  | 3.1  | 1.2 | YFL02 STE  | -4.8 | 0.7 |
| YBL05 CMC2  | 3.7 | 1.5 | YHR0E TDA3  | 2.8 | 1.3 | YLL02 POM   | 3.1  | 1.4 | YHR0E RRP  | -4.8 | 0.8 |
| YOR3 PYK2   | 3.7 | 1.3 | YFR01 -     | 2.8 | 1.5 | YDR1E STE5  | 3.1  | 1.2 | YDL11 RRP  | -4.8 | 0.8 |
| YNL17 MRPL  | 3.7 | 1.2 | YDL13 ARF2  | 2.8 | 1.2 | YGL0C PMC   | 3.1  | 1.2 | YHR1E IKI1 | -4.8 | 0.8 |
| YEL04 PAU2  | 3.7 | 1.3 | YML0E -     | 2.8 | 1.4 | YBR1E CDC   | 3.1  | 1.2 | YGR1E UTP  | -4.8 | 0.8 |
| YLR42 ATG17 | 3.7 | 1.3 | YCL03 GID7  | 2.8 | 1.3 | YPR0E ICL2  | 3.1  | 1.4 | YNL31 PHA  | -4.8 | 0.8 |
| YKR0E -     | 3.7 | 1.3 | YML0E CMP   | 2.8 | 1.3 | YBL09 BNA   | 3.1  | 1.3 | YDL24 LRG  | -4.8 | 0.8 |
| YOR2E RDL1  | 3.7 | 1.4 | YGL0C -     | 2.8 | 1.8 | YNL18 SWT   | 3.1  | 1.3 | YLR36 ---  | -4.8 | 0.8 |
| YBR11 SUS1  | 3.7 | 1.2 | YNL27 CAF1  | 2.8 | 1.4 | YPR0E SEC6  | 3.1  | 1.2 | YLR13 ZRT  | -4.8 | 0.8 |
| YJR12 CAF17 | 3.7 | 1.4 | YBR0E -     | 2.8 | 1.3 | YFL01 WWM   | 3.1  | 1.3 | YOR0E CYC  | -4.8 | 0.8 |
| YCR0E -     | 3.7 | 1.4 | YPL17 NIP1  | 2.8 | 1.4 | YLR09 ICT1  | 3.1  | 1.3 | YMR2E HSH  | -4.8 | 0.8 |
| YLR38 NAM2  | 3.7 | 1.3 | YJL07 NET1  | 2.8 | 1.3 | YAL01 NTG   | 3.1  | 1.3 | YAL02 ATS  | -4.7 | 0.8 |
| YGL2C SIP2  | 3.7 | 1.4 | YKR0E HBS1  | 2.8 | 1.2 | YHR11 DMA   | 3.1  | 1.3 | YKL04 ELM  | -4.7 | 0.8 |
| YPR0E TIP41 | 3.6 | 1.2 | YJL07 -     | 2.8 | 1.4 | YLR14 ACF2  | 3.1  | 1.3 | YLR00 NOC  | -4.7 | 0.8 |
| YGL2E RMR1  | 3.6 | 1.4 | YAL05 ACS1  | 2.8 | 1.4 | YGL1E -     | 3.1  | 1.2 | YAR0E PRM  | -4.7 | 0.7 |
| YPL11 MRP5  | 3.6 | 1.2 | YEL04 -     | 2.8 | 1.5 | YBR14 ARA1  | 3.1  | 1.4 | YBR0E TRM  | -4.7 | 0.7 |
| YNL23 LAP3  | 3.6 | 1.3 | YPR1E KRE6  | 2.8 | 1.2 | YKR0E UBP1  | 3.1  | 1.2 | YCR0E ---  | -4.7 | 0.8 |
| YGL01 -     | 3.6 | 1.2 | YKL07 STB6  | 2.8 | 1.3 | YIL03E CST6 | 3.1  | 1.3 | YML0E DUS  | -4.7 | 0.7 |
| YDL0E -     | 3.6 | 1.3 | YKR0E PTR2  | 2.8 | 1.6 | YGL1E STR3  | 3.1  | 1.5 | YBR0E HMT  | -4.7 | 0.8 |
| YKL10 -     | 3.6 | 1.4 | YJR00 -     | 2.8 | 1.8 | YNL30 MRP   | 3.1  | 1.2 | YMR2 ZRC   | -4.7 | 0.8 |
| YHR1E MRPL  | 3.6 | 1.3 | YFR02 PTR3  | 2.8 | 1.3 | YFR02 ATG1  | 3.1  | 1.4 | YJL17 SWI  | -4.7 | 0.8 |
| YML07 TCB3  | 3.6 | 1.2 | YMR1E -     | 2.8 | 1.3 | YGL0E MNP   | 3.1  | 1.3 | YPL12 TAF  | -4.7 | 0.9 |
| YNL00 MRP7  | 3.6 | 1.2 | YJL07 ICS3  | 2.7 | 1.6 | YOR3E -     | 3.1  | 1.3 | YOR2E SAS  | -4.7 | 0.8 |
| YOR0E TGL5  | 3.6 | 1.4 | YGR1E -     | 2.7 | 1.6 | YLR31 MRPI  | 3.1  | 1.3 | YLR29 GCD  | -4.7 | 0.8 |
| YHL04 -     | 3.6 | 1.7 | YLR15 PCD1  | 2.7 | 1.4 | YBR14 IRA1  | 3.1  | 1.2 | YER1E NSA  | -4.7 | 0.8 |
| YML0E NTE1  | 3.6 | 1.4 | YDR0E REG   | 2.7 | 1.3 | YAR07 PHO   | ###  | 0.1 | YHR0E ---  | -4.6 | 0.8 |
| YMR1E ADE17 | 3.6 | 1.4 | YOL0E MIM1  | 2.7 | 1.3 | YHR21 PHO   | ###  | 0.1 | YBR1E ---  | -4.6 | 0.7 |
| YHR0E KSP1  | 3.6 | 1.3 | YDR1E CSN6  | 2.7 | 1.4 | YDR4E MFA   | ###  | 0.5 | YDR4E RMT  | -4.6 | 0.8 |
| YAR0E -     | 3.6 | 1.3 | YOR0E CUE5  | 2.7 | 1.2 | YOR3E GDH   | ###  | 0.4 | YIL0E CFD  | -4.6 | 0.8 |
| YAL01 -     | 3.6 | 1.5 | YLL06 PAU6  | 2.7 | 1.3 | YKL12 OAC   | ###  | 0.3 | YHR1E ---  | -4.6 | 0.8 |
| YOR1E -     | 3.6 | 1.5 | YNR07 PAU6  | 2.7 | 1.3 | YIL121 QDR  | ###  | 0.2 | YDR1E ---  | -4.6 | 0.8 |
| YGR0E MSP1  | 3.6 | 1.4 | YNL07 APJ1  | 2.7 | 1.2 | YIL17E PAU1 | ###  | 0.2 | YFL02 GYP  | -4.6 | 0.8 |
| YGR1E SHY1  | 3.6 | 1.6 | YIL10E -    | 2.7 | 1.2 | YJL22 PAU1  | ###  | 0.2 | YLR21 CDC  | -4.6 | 0.8 |
| YDR2E MFB1  | 3.6 | 1.2 | YGR1E CLC1  | 2.7 | 1.2 | YLR46 PAU   | ###  | 0.3 | YKL11 PRR  | -4.6 | 0.8 |
| YHL02 RIM4  | 3.6 | 1.5 | YGL21 MDM   | 2.7 | 1.3 | YOL1E PAU   | ###  | 0.3 | YDR4E DOT  | -4.6 | 0.8 |
| YJL05 -     | 3.6 | 1.2 | YKR0E NTR2  | 2.7 | 1.4 | YLL06 PAU6  | ###  | 0.3 | YLR45 ---  | -4.6 | 0.9 |
| YCR0E SYP1  | 3.6 | 1.5 | YBR1E -     | 2.7 | 1.5 | YNR07 PAU6  | ###  | 0.3 | YNR0E TRM  | -4.6 | 0.7 |
| YKL13 SHE2  | 3.6 | 1.2 | YLR43 ATG2  | 2.7 | 1.4 | YOR2E STE4  | ###  | 0.6 | YIR02E YVH | -4.6 | 0.8 |
| YPL03 PHO8E | 3.5 | 1.3 | YBR14 ARA1  | 2.7 | 1.4 | YNR07 AIF1  | ###  | 0.3 | YHR0E RPP  | -4.6 | 0.8 |
| YNR0E -     | 3.5 | 1.5 | YOR3E FRE3  | 2.7 | 1.6 | YLR45 SST2  | ###  | 0.4 | YOR1E ---  | -4.6 | 0.8 |
| YJR08 STE18 | 3.5 | 1.3 | YNL08 TOP2  | 2.7 | 1.3 | YGL1C -     | ###  | 0.6 | YAR0E SEN  | -4.6 | 0.8 |
| YBR2E MRPL  | 3.5 | 1.3 | YMR2E RAD1  | 2.7 | 1.3 | YOR2E DFR1  | ###  | 0.6 | YNR0E ---  | -4.5 | 0.7 |
| YOR2E MPD1  | 3.5 | 1.3 | YMR3E ADH2  | 2.7 | 1.3 | YFR0E IRC7  | ###  | 0.3 | YNL18 IPI3 | -4.5 | 0.7 |
| YNR0E RSM1E | 3.5 | 1.5 | YDR0E PST2  | 2.7 | 1.4 | YHR21 IMD2  | ###  | 0.3 | YJR06 HAM  | -4.5 | 0.8 |
| YIL12E KGD1 | 3.5 | 1.4 | YER0E PTC2  | 2.7 | 1.3 | YNL14 ALF1  | ###  | 0.5 | YFL04 RGD  | -4.5 | 0.8 |
| YBR0E FAT1  | 3.5 | 1.3 | YGL0E ALK1  | 2.7 | 1.3 | YDL24 COS   | -9.9 | 0.1 | YGL0E AGA  | -4.5 | 0.6 |
| YOR0E -     | 3.5 | 1.3 | YGR0E ASK1  | 2.7 | 1.2 | YJR16 COS   | -9.9 | 0.1 | YNL16 PSD  | -4.5 | 0.8 |
| YBR1E TPS1  | 3.5 | 1.6 | YJR00 SAG1  | 2.7 | 1.4 | YAL06 PAU6  | -9.6 | 0.3 | YOL01 RCL  | -4.5 | 0.7 |
| YAL03 GIP4  | 3.5 | 1.3 | YML01 SEL1  | 2.7 | 1.3 | YOR2E ISU2  | -9.6 | 0.6 | YGL1E SUA  | -4.5 | 0.8 |
| YPL23 ENV7  | 3.5 | 1.2 | YPL01 SWI1  | 2.7 | 1.3 | YHL04 COS   | -9.6 | 0.1 | YOL0E REX  | -4.5 | 0.7 |
| YDR1E KIN1  | 3.5 | 1.4 | YDL03 PRM   | 2.7 | 1.7 | YDR5E -     | -9.5 | 0.2 | YOR2E YTM  | -4.5 | 0.8 |
| YDR5E GMC1  | 3.5 | 1.3 | YKL22 -     | 2.7 | 1.3 | YBR2E GPX   | -9.4 | 0.3 | YKR0E ---  | -4.5 | 0.7 |
| YKL05 MPE1  | 3.5 | 1.2 | YMR2E HFA1  | 2.7 | 1.3 | YAR07 IMD1  | -9.2 | 0.2 | YNR0E AGA  | -4.5 | 0.4 |
| YPL24 -     | 3.5 | 1.2 | YML0E YAP1  | 2.7 | 1.3 | YHR21 IMD2  | -9.2 | 0.2 | YDL21 ---  | -4.5 | 0.8 |
| YJL12 TRK1  | 3.5 | 1.2 | YDR3E -     | 2.7 | 1.3 | YGL0C LEU1  | -9.0 | 0.4 | YCL03 GFD  | -4.5 | 0.7 |
| YGR0E -     | 3.5 | 1.3 | YJL05 -     | 2.6 | 1.2 | YMR2E RSN   | -8.9 | 0.6 | YCL02 FUS  | -4.5 | 0.4 |
| YPL18 RTC6  | 3.5 | 1.2 | YKR0E SPO   | 2.6 | 1.3 | YDL19 GGC   | -8.9 | 0.7 | YML0E APT  | -4.5 | 0.8 |
| YDR0E DOA4  | 3.5 | 1.4 | YOR1E RGA   | 2.6 | 1.3 | YIR02E YVH1 | -8.9 | 0.7 | YML0E USA  | -4.5 | 0.7 |
| YNR0E -     | 3.5 | 1.5 | YLL02 POM   | 2.6 | 1.3 | YMR0E HXT2  | -8.9 | 0.2 | YHR1E DSE  | -4.5 | 0.6 |
| YKL12 MYO3  | 3.5 | 1.3 | YLR02 SNF7  | 2.6 | 1.3 | YNL12 NRK   | -8.6 | 0.6 | YKL19 DPH  | -4.5 | 0.8 |
| YJR09 JSN1  | 3.5 | 1.3 | YBR3E COS   | 2.6 | 1.3 | YER17 GRX   | -8.5 | 0.6 | YOR0E ---  | -4.5 | 0.8 |
| YDL17 AIR2  | 3.5 | 1.3 | YML1E COS   | 2.6 | 1.3 | YHR0E GPA   | -8.5 | 0.6 | YLR03 RAD  | -4.4 | 0.8 |
| YLR38 STE23 | 3.5 | 1.2 | YJR11 TDA4  | 2.6 | 1.4 | YJR00 SUI2  | -8.1 | 0.7 | YLR18 EMC  | -4.4 | 0.8 |

|               |      |     |             |     |     |             |      |     |             |      |     |
|---------------|------|-----|-------------|-----|-----|-------------|------|-----|-------------|------|-----|
| YKL15 APE2    | 3.5  | 1.3 | YOR0: PEP1  | 2.6 | 1.4 | YKR0C MEH   | -8.0 | 0.6 | YDL01 NOP   | -4.4 | 0.8 |
| YIL02C-       | 3.5  | 1.5 | YML01 PSP2  | 2.6 | 1.3 | YPL24 CIN2  | -8.0 | 0.5 | YLR31 TAD   | -4.4 | 0.8 |
| YPL01-        | 3.5  | 1.8 | YLR17 APS1  | 2.6 | 1.4 | YPL19-      | -7.9 | 0.7 | YPR1E ORC   | -4.4 | 0.8 |
| YOL0C SIL1    | 3.5  | 1.3 | YDL11 TMA1  | 2.6 | 1.4 | YPL17 CBC2  | -7.8 | 0.7 | YNL30 MCK   | -4.4 | 0.8 |
| YHR0E-        | 3.5  | 1.3 | YKR0C KTR2  | 2.6 | 1.2 | YDR3E ATOC  | -7.8 | 0.6 | YBR0E TEC   | -4.4 | 0.6 |
| YOR2: MCT1    | 3.5  | 1.5 | YAR0Z-      | 2.6 | 1.3 | YER1E-      | -7.8 | 0.3 | YPR01 TIF6  | -4.4 | 0.8 |
| YJL09 GWT1    | 3.5  | 1.2 | YLR45 FMP2  | 2.6 | 1.4 | YOR1C VAM:  | -7.7 | 0.7 | YBR2E DUT   | -4.4 | 0.8 |
| YPR0Z ATP20   | 3.5  | 1.2 | YCR0E SED4  | 2.6 | 1.3 | YHR2C BAT1  | -7.7 | 0.5 | YCR0E TUP   | -4.4 | 0.9 |
| YGR1E RTS3    | 3.4  | 1.5 | YLR33 VRP1  | 2.6 | 1.4 | YBR3C COS:  | -7.7 | 0.4 | YBR2Z ENP   | -4.4 | 0.8 |
| YDR3C GIC2    | 3.4  | 1.3 | YJL15: HSP1 | 2.6 | 1.3 | YML1C COS:  | -7.7 | 0.4 | YNL20 PSY   | -4.4 | 0.7 |
| YNL13 FYV6    | 3.4  | 1.5 | YNL16 YGP1  | 2.6 | 1.3 | YDR11 TMAE  | -7.6 | 0.6 | YOL0E RIB2  | -4.4 | 0.8 |
| YDR1C TVP15   | 3.4  | 1.4 | YPR0Z YME-  | 2.6 | 1.2 | YDR2E CIA1  | -7.6 | 0.6 | YEL05 HAT   | -4.3 | 0.8 |
| YPR1Z-        | 3.4  | 1.4 | YJL09: CHSE | 2.6 | 1.2 | YFR03 PHO:  | -7.5 | 0.6 | YPL16 ---   | -4.3 | 0.8 |
| YDL21 RRI1    | 3.4  | 1.3 | YMR1: PGM:  | 2.6 | 1.8 | YPR1Z ANT1  | -7.5 | 0.6 | YNR01 URK   | -4.3 | 0.8 |
| YBR2E MRPS:   | 3.4  | 1.3 | YMR0:-      | 2.6 | 1.2 | YPL12 TAF1  | -7.5 | 0.7 | YJR01 ---   | -4.3 | 0.8 |
| YLR01 TEN1    | 3.4  | 1.5 | YLR08 GAA1  | 2.6 | 1.3 | YDR5C PAD1  | -7.5 | 0.4 | YCR0E RRP   | -4.3 | 0.8 |
| YIL02Z-       | 3.4  | 1.2 | YOR1E-      | 2.6 | 1.4 | YDR1E-      | -7.4 | 0.7 | YDR0Z ---   | -4.3 | 0.7 |
| YFL01 MDJ1    | 3.4  | 1.2 | YER01 BUD2  | 2.6 | 1.3 | YDR2E SWM   | -7.3 | 0.7 | YAR0C NUP   | -4.3 | 0.8 |
| YER0E RAD51   | 3.4  | 1.3 | YDL12 SNAZ  | 2.6 | 1.2 | YGR0C TFG2  | -7.2 | 0.7 | YOR0: ---   | -4.3 | 0.9 |
| YJL02: BBC1   | 3.4  | 1.4 | YLR17 RFX1  | 2.6 | 1.3 | YLR22 CDC:  | -7.2 | 0.8 | YOL0E SPE   | -4.3 | 0.8 |
| YLR13 SLX4    | 3.4  | 1.1 | YHL04 COS:  | 2.6 | 1.6 | YOR2: FSF1  | -7.1 | 0.7 | YCR0E HCM   | -4.3 | 0.8 |
| YFL04-        | 3.4  | 1.2 | YIL13E TPMZ | 2.5 | 1.2 | YLR18 SAM:  | -7.1 | 0.6 | YNL05 COX   | -4.3 | 0.8 |
| YDL13 ARF2    | 3.4  | 1.1 | YDR5C GMC   | 2.5 | 1.3 | YDR27 RNH:  | -7.1 | 0.7 | YML0E ---   | -4.3 | 0.8 |
| YDR5: SLF1    | 3.4  | 1.3 | YGR2E BGL2  | 2.5 | 1.2 | YER1E-      | -7.0 | 0.3 | YGL21 NCS   | -4.3 | 0.7 |
| YNL12-        | 3.4  | 1.4 | YAR0E FLO1  | 2.5 | 1.3 | YJL11 CCT7  | -6.9 | 0.7 | YER0E PRS   | -4.3 | 0.8 |
| YLR44-        | 3.4  | 1.8 | YGR1E RNR:  | 2.5 | 1.3 | YDR4Z DOT-  | -6.9 | 0.7 | YNR0E DSE   | -4.3 | 0.8 |
| YBL01-        | 3.4  | 1.2 | YEL07 DSF1  | 2.5 | 1.7 | YER1E-      | -6.9 | 0.7 | YNL24 NAR   | -4.3 | 0.8 |
| YJL15: INO1   | 3.4  | 1.3 | YNR0: DSF1  | 2.5 | 1.7 | YJL12: LSM1 | -6.9 | 0.7 | YLL03 PRP   | -4.3 | 0.8 |
| YOR0: TIR2    | 3.4  | 1.3 | YDL15-      | 2.5 | 1.2 | YLR21 FRE1  | -6.9 | 0.6 | YJL01: CCT  | -4.2 | 0.9 |
| YKL09 CWP2    | 3.4  | 1.1 | YJR09 BUD:  | 2.5 | 1.2 | YLR04-      | -6.8 | 0.5 | YDL17 GLT-  | -4.2 | 0.9 |
| YHR0E HXT1    | ###  | 0.1 | YOR2: HIS3  | 2.5 | 1.3 | YER0E HIS1  | -6.7 | 0.7 | YCR0: RSA   | -4.2 | 0.8 |
| YAR0: PHO1:   | ###  | 0.3 | YOL0C-      | 2.5 | 1.3 | YLR41 BER1  | -6.6 | 0.7 | YDL23 PHO   | -4.2 | 0.9 |
| YHR2: PHO1Z   | ###  | 0.3 | YHR1E RTT1  | 2.5 | 1.4 | YFR04 ERJ5  | -6.6 | 0.6 | YGR1E PUS   | -4.2 | 0.8 |
| YDR3E ATO3    | ###  | 0.2 | YOL0Z IFM1  | 2.5 | 1.3 | YCL00-      | -6.6 | 0.6 | YOR1: SYC   | -4.2 | 0.8 |
| YNL04-        | ###  | 0.2 | YJL15 SNA3  | 2.5 | 1.3 | YLR44 FPR:  | -6.5 | 0.7 | YBL10 RTG   | -4.2 | 0.8 |
| YDR2Z-        | ###  | 0.3 | YOR3E HAP:  | 2.5 | 1.3 | YKR0Z GCN:  | -6.4 | 0.7 | YHR0C GPA   | -4.2 | 0.8 |
| YMR0: HXT2    | ###  | 0.0 | YLL01 PUF3  | 2.5 | 1.4 | YJL15: FAR1 | -6.4 | 0.5 | YKR0C RSC   | -4.2 | 0.8 |
| YJL19 RPS1:   | ###  | 0.4 | YJL20: RCY1 | 2.5 | 1.2 | YER07 ALD5  | -6.4 | 0.6 | YMR2: DML   | -4.2 | 0.8 |
| YHR2: IMD2    | ###  | 0.1 | YLR43 ECM:  | 2.5 | 1.2 | YHR0Z-      | -6.3 | 0.7 | YKL10 AAT-  | -4.2 | 0.8 |
| YGR1: MEP1    | ###  | 0.3 | YNL24 SLD2  | 2.5 | 1.2 | YCL06 VAC1  | -6.3 | 0.7 | YGR1: CAF   | -4.2 | 0.8 |
| YNL09-        | ###  | 0.3 | YDL17 DL2   | 2.5 | 1.2 | YNL15 RPC:  | -6.2 | 0.6 | YOL12 YGK   | -4.2 | 0.8 |
| YDL24-        | ###  | 0.4 | YLR11 AVL9  | 2.5 | 1.3 | YPL27 SAM:  | -6.2 | 0.6 | YLR04 ---   | -4.2 | 0.7 |
| YCR0E-        | ###  | 0.5 | YDL02-      | 2.5 | 1.3 | YIL021 RPB3 | -6.2 | 0.7 | YER0Z GCD   | -4.2 | 0.9 |
| YIL01C: PDR11 | ###  | 0.5 | YCL02 HBN1  | 2.5 | 1.3 | YKL15 SRP1  | -6.2 | 0.7 | YBL02 HAP   | -4.2 | 0.8 |
| YOR3: ATF1    | ###  | 0.4 | YDR4: SNX4  | 2.5 | 1.3 | YDR4E SEC2  | -6.1 | 0.7 | YNR0E POP   | -4.2 | 0.9 |
| YLR32 NMA1    | ###  | 0.5 | YJL12-      | 2.5 | 1.3 | YGL02 GET1  | -6.1 | 0.7 | YNL07 RNH   | -4.2 | 0.7 |
| YBL03 URA7    | ###  | 0.5 | YER1E BUR:  | 2.5 | 1.2 | YMR1: SSO:  | -6.1 | 0.6 | YPR1Z ANT   | -4.2 | 0.8 |
| YLR44 FPR4    | ###  | 0.5 | YPR0C HAL1  | 2.5 | 1.3 | YPR0E NHP:  | -6.1 | 0.7 | YKL07 DHR   | -4.1 | 0.7 |
| YML0C ERG6    | ###  | 0.6 | YMR1: ECM:  | 2.5 | 1.3 | YHL04 ARN:  | -6.1 | 0.4 | YNR0Z MVD   | -4.1 | 0.8 |
| YOL0Z TSR4    | ###  | 0.6 | YOR1: ORT1  | 2.5 | 1.2 | YOL1E BDS1  | -6.0 | 0.8 | YBR0Z POA   | -4.1 | 0.8 |
| YDR1E-        | ###  | 0.5 | YBR0Z ZTA1  | 2.5 | 1.2 | YPL25 BBP1  | -6.0 | 0.7 | YOL0E WR:   | -4.1 | 0.8 |
| YEL04 UTR2    | ###  | 0.5 | YER1C: PMD- | 2.5 | 1.2 | YGR1Z-      | -6.0 | 0.6 | YOR0E NOB   | -4.1 | 0.8 |
| YGR2: SDA1    | ###  | 0.5 | YDR5C HSP:  | 2.5 | 1.8 | YEL01 EDC:  | -6.0 | 0.7 | YLR22 BUR   | -4.1 | 0.8 |
| YNL14 AAH1    | ###  | 0.4 | YDL1E RADE  | 2.5 | 1.2 | YIL07: HOP: | -5.9 | 0.3 | YGR0: PAC   | -4.1 | 0.8 |
| YER0Z MXR1    | ###  | 0.4 | YDR3: IPK1  | 2.5 | 1.3 | YOR1C RAS1  | -5.9 | 0.7 | YPL06 BTS   | -4.1 | 0.8 |
| YEL01 EDC3    | ###  | 0.6 | YDR0E STN1  | 2.5 | 1.4 | YIL01E BAR1 | -5.9 | 0.5 | YIL08E KTR- | -4.1 | 0.8 |
| YDR4E RMT2    | ###  | 0.5 | YBR0C GPI1: | 2.5 | 1.2 | YMR1: CIN4  | -5.9 | 0.6 | YNL04 ---   | -4.1 | 0.8 |
| YOR1E: PDR5   | ###  | 0.5 | YDR5: EMI1  | 2.5 | 1.2 | YDR2: MNN   | -5.9 | 0.7 | YBL02 NCL   | -4.1 | 0.9 |
| YIR02: YVH1   | ###  | 0.6 | YDR0E AFR1  | 2.5 | 1.3 | YKR0C GMH   | -5.9 | 0.7 | --- ---     | -4.1 | 0.8 |
| YNL11 DBP2    | ###  | 0.5 | YIL02E IRR1 | 2.5 | 1.3 | YGL21 SKI8  | -5.9 | 0.7 | YEL04 GDA   | -4.1 | 0.8 |
| YJR04 CYC1    | ###  | 0.7 | YMR2: ESC1  | 2.5 | 1.4 | YDL22 HO    | -5.9 | 0.7 | YBR2E RE11  | -4.1 | 0.7 |
| YHR1E RIX1    | ###  | 0.5 | YNL19 CHS1  | 2.5 | 1.2 | YMR0E NPL:  | -5.9 | 0.6 | YPR17 BSP   | -4.1 | 0.8 |
| YOR2: YTM1    | ###  | 0.5 | YER1C-      | 2.5 | 1.3 | YOR1Z LEO1  | -5.9 | 0.7 | YBR1E ---   | -4.1 | 0.8 |
| YPR0C SUT2    | ###  | 0.7 | YNL13 SRV2  | 2.5 | 1.2 | YIL011 TIR3 | -5.8 | 0.5 | YBR21 ---   | -4.1 | 0.8 |
| YER1E-        | ###  | 0.6 | YJL13 AIM2  | 2.5 | 1.3 | YGL24 RTF1  | -5.8 | 0.7 | YBR2Z ---   | -4.1 | 0.8 |
| YML0E DUS1    | ###  | 0.6 | YER1Z: UBP: | 2.4 | 1.2 | YOR2Z PUS:  | -5.8 | 0.6 | YML0Z UNG   | -4.1 | 0.8 |
| YKL07 DHR2    | -9.9 | 0.5 | YHR1E TDA1  | 2.4 | 1.3 | YGR2Z SDA1  | -5.8 | 0.7 | YBL01 FUS:  | -4.1 | 0.6 |
| YMR1: RRB1    | -9.8 | 0.6 | YCR0E TAH1  | 2.4 | 1.3 | YCL02 FUS1  | -5.8 | 0.3 | YIL14E PAN  | -4.1 | 0.9 |
| YHR1: NMD3    | -9.8 | 0.5 | YCL01 NFS1  | 2.4 | 1.3 | YGL25 RTG:  | -5.8 | 0.7 | YGL17 ---   | -4.1 | 0.8 |
| YGL11 NSA1    | -9.7 | 0.6 | YKL12 MYO:  | 2.4 | 1.3 | YIL15E AIM2 | -5.8 | 0.6 | YGR2C SER   | -4.1 | 0.9 |
| YBR0E PHO5    | -9.7 | 0.5 | YHL02 RIM4  | 2.4 | 1.4 | YNL29 PUS:  | -5.7 | 0.7 | YEL01 EDC   | -4.1 | 0.8 |

|             |      |     |             |     |     |            |      |     |            |      |     |
|-------------|------|-----|-------------|-----|-----|------------|------|-----|------------|------|-----|
| YGL16 SUA5  | -9.7 | 0.7 | YKL06 YNK1  | 2.4 | 1.2 | YGR2 BRF1  | -5.7 | 0.7 | YOL02 ---  | -4.1 | 0.8 |
| YNL03 -     | -9.7 | 0.5 | YDR0 YOS6   | 2.4 | 1.2 | YER1 GLE2  | -5.7 | 0.8 | YDR4 ERD   | -4.1 | 0.8 |
| YNL01 -     | -9.7 | 0.5 | YGL2 VID3   | 2.4 | 1.3 | YHR1 SPL2  | -5.7 | 0.6 | YOR3 RAX   | -4.1 | 0.7 |
| YJL20 NUC1  | -9.5 | 0.7 | YEL00 YEA4  | 2.4 | 1.3 | YOR3 SFG1  | -5.7 | 0.6 | YML11 TAF1 | -4.1 | 0.8 |
| YOR2 SAS5   | -9.4 | 0.7 | YDR4 PDR1   | 2.4 | 1.2 | YFL06 COS1 | -5.7 | 0.7 | YHR12 MSH  | -4.1 | 0.7 |
| YDL18 LYS20 | -9.4 | 0.7 | YJL02 RNR2  | 2.4 | 1.3 | YGR2 COS1  | -5.7 | 0.7 | YOL09 TRM  | -4.1 | 0.8 |
| YPR12 ANT1  | -9.4 | 0.6 | YDR12 SAC6  | 2.4 | 1.2 | YNL33 COS1 | -5.7 | 0.7 | YPL15 TGS  | -4.1 | 0.8 |
| YBR2 ENP1   | -9.4 | 0.5 | YJL01 MAD1  | 2.4 | 1.3 | YDL03 PUS9 | -5.6 | 0.7 | YJR02 ---  | -4.1 | 0.8 |
| YJR07 LIA1  | -9.4 | 0.6 | YER1 FTR1   | 2.4 | 1.4 | YCL03 HIS4 | -5.6 | 0.7 | YJL19 ---  | -4.1 | 0.8 |
| YGR1 HGH1   | -9.4 | 0.6 | YGL02 CWH   | 2.4 | 1.3 | YML06 POB1 | -5.6 | 0.7 | YBL03 POL  | -4.0 | 0.8 |
| YML07 HMG1  | -9.3 | 0.6 | YBR0 UGA2   | 2.4 | 1.2 | YOL02 TSR4 | -5.6 | 0.8 | YNL11 CYB  | -4.0 | 0.7 |
| YNR0 SMM1   | -9.3 | 0.6 | YOL05 AIM3  | 2.4 | 1.2 | YPL08 RPS9 | -5.6 | 0.8 | YJR00 SUI2 | -4.0 | 0.8 |
| YOL12 TRM1  | -9.2 | 0.6 | YGR2 -      | 2.4 | 1.3 | YNL25 GIS2 | -5.6 | 0.8 | YLR04 ---  | -4.0 | 0.7 |
| YBR27 EFM2  | -9.2 | 0.6 | YMR0 CTF1   | 2.4 | 1.2 | YGR1 (-    | -5.6 | 0.2 | YHR1 RIX1  | -4.0 | 0.8 |
| YKL02 MAK1  | -9.2 | 0.5 | YOR0 RTS1   | 2.4 | 1.3 | YGR1 (-    | -5.6 | 0.2 | YML02 YOX  | -4.0 | 0.7 |
| YJL19 PHO9  | -9.2 | 0.6 | YBR0 SEC1   | 2.4 | 1.3 | YIL082 -   | -5.6 | 0.2 | YNL17 NOP  | -4.0 | 0.8 |
| YOR1 PNO1   | -9.1 | 0.6 | YDR4 NHX1   | 2.4 | 1.2 | YIL082 -   | -5.6 | 0.2 | YJL20 NUC  | -4.0 | 0.8 |
| YOL08 REX4  | -9.0 | 0.5 | YGL11 -     | 2.4 | 1.2 | YPR14 ASN1 | -5.6 | 0.7 | YJL06 UTP  | -4.0 | 0.8 |
| YER12 NSA2  | -9.0 | 0.6 | YPL07 GCR1  | 2.4 | 1.2 | YHR2 CPX1  | -5.6 | 0.6 | YPL08 RPS  | -4.0 | 0.8 |
| YIL00 CFD1  | -9.0 | 0.6 | YGR1 FYV8   | 2.4 | 1.3 | YLR35 ADE1 | -5.6 | 0.7 | YBR1 POP   | -4.0 | 0.9 |
| YIL05 RHR2  | -8.9 | 0.7 | YCL06 MRC1  | 2.4 | 1.4 | YLL00 RTT1 | -5.6 | 0.7 | YLL00 RTT  | -4.0 | 0.8 |
| YGL25 HFM1  | -8.9 | 0.2 | YOR3 FAA1   | 2.4 | 1.3 | YDR4 TIF3  | -5.5 | 0.6 | YNL08 TCB  | -4.0 | 0.8 |
| YOL15 HPF1  | -8.9 | 0.2 | YDR3 MSN1   | 2.4 | 1.2 | YGL11 CUE1 | -5.5 | 0.8 | YDR37 ---  | -4.0 | 0.8 |
| YGL20 MIG2  | -8.8 | 0.5 | YDL03 PRM1  | 2.4 | 1.8 | YEL04 UTR2 | -5.5 | 0.7 | YGR1 PPT   | -4.0 | 0.7 |
| YOR1 RAS1   | -8.7 | 0.6 | YMR0 PLB1   | 2.4 | 2.1 | YJL01 VTC4 | -5.5 | 0.7 | YOR2 CLP   | -4.0 | 0.9 |
| YMR0 SOK2   | -8.7 | 0.5 | YKL13 HSK3  | 2.4 | 1.2 | YFL02 STE2 | -5.5 | 0.5 | YGR1 HGH   | -4.0 | 0.8 |
| YOR0 NOB1   | -8.7 | 0.6 | YMR0 ARG1   | 2.4 | 1.2 | YNL14 MFA2 | -5.5 | 0.7 | YOL01 HTZ  | -4.0 | 0.8 |
| YPR11 MRI1  | -8.7 | 0.7 | YER0 PIC2   | 2.4 | 1.5 | YGR1 PPT1  | -5.5 | 0.7 | YDR52 ---  | -4.0 | 0.8 |
| YPL23 YAR1  | -8.6 | 0.7 | YGL05 VPS4  | 2.4 | 1.2 | YPR1 VPS6  | -5.4 | 0.7 | YPR0 TIF5  | -4.0 | 0.9 |
| YNL06 GCD1  | -8.6 | 0.7 | YDR4 PPN1   | 2.4 | 1.2 | YHR17 NMD1 | -5.4 | 0.7 | YCR01 MAK  | -3.9 | 0.9 |
| YKR0 UTP3   | -8.5 | 0.6 | YBR0 UBP1   | 2.4 | 1.2 | YCR1 AAD3  | -5.4 | 0.7 | YDL04 SIR2 | -3.9 | 0.8 |
| YPR0 YMC1   | -8.5 | 0.7 | YER1 -      | 2.4 | 1.3 | YOL16 AAD1 | -5.4 | 0.7 | YHR0 HXT   | -3.9 | 0.7 |
| YNL14 ALF1  | -8.5 | 0.6 | YPR0 PUF2   | 2.4 | 1.3 | YER1E -    | -5.4 | 0.6 | YHL00 STE1 | -3.9 | 0.9 |
| YLR28 NNT1  | -8.4 | 0.7 | YBR2 LDH1   | 2.4 | 1.2 | YDL15 MSH1 | -5.4 | 0.6 | YOR0 PET   | -3.9 | 0.8 |
| YNR0 MVD1   | -8.4 | 0.6 | YPL07 UBP1  | 2.4 | 1.2 | YOR0 ETT1  | -5.4 | 0.7 | YHR0 C1C1  | -3.9 | 0.8 |
| YOL09 TRM1  | -8.4 | 0.6 | YBR2 VBA2   | 2.3 | 1.2 | YDR41 ERD1 | -5.4 | 0.7 | YOR3 ---   | -3.9 | 0.8 |
| YMR0 ERB1   | -8.4 | 0.6 | YLR34 FKS1  | 2.3 | 1.2 | YOR0 RKI1  | -5.4 | 0.7 | YBL03 URA  | -3.9 | 0.8 |
| YJL06 UTP18 | -8.4 | 0.6 | YHR1 ARO5   | 2.3 | 1.2 | YPL10 ELP4 | -5.3 | 0.7 | YOR1 VAM   | -3.9 | 0.8 |
| YBR0 HMT1   | -8.3 | 0.6 | YDL08 -     | 2.3 | 1.3 | YOL05 GPM  | -5.3 | 0.6 | YDR2 MNN   | -3.9 | 0.8 |
| YDR2 LYS4   | -8.3 | 0.7 | YOR2 AIM4   | 2.3 | 1.2 | YAR01 KIN3 | -5.3 | 0.7 | YGR0 ---   | -3.9 | 0.8 |
| YOR1 PNS1   | -8.3 | 0.5 | YOR2 WTM    | 2.3 | 1.4 | YAR01 ADE1 | -5.3 | 0.7 | YLR05 IES3 | -3.9 | 0.8 |
| YJL20 ACO2  | -8.2 | 0.6 | YDR47 -     | 2.3 | 1.3 | YOR2 PLP2  | -5.3 | 0.8 | YGL06 PUS  | -3.9 | 0.8 |
| YBR2 DUR1   | -8.2 | 0.5 | YDL07 YET3  | 2.3 | 1.3 | YGL06 DUO  | -5.3 | 0.6 | YKL01 RAM  | -3.9 | 0.8 |
| YLR13 ZRT2  | -8.2 | 0.7 | YJL08 IML2  | 2.3 | 1.2 | YNL08 TCB2 | -5.3 | 0.8 | YDR4 ---   | -3.9 | 0.8 |
| YKR0 RPF2   | -8.1 | 0.5 | YHR0 SOD1   | 2.3 | 1.2 | YBR0 YPK3  | -5.3 | 0.6 | YBL00 HTB  | -3.9 | 0.8 |
| YJL12 GCD1  | -8.1 | 0.6 | YHR17 FMO1  | 2.3 | 1.4 | YDR5 APA2  | -5.3 | 0.7 | YLR07 RGR  | -3.9 | 0.9 |
| YDR12 -     | -8.1 | 0.7 | YPL17 TRE1  | 2.3 | 1.2 | YKL18 LOT5 | -5.3 | 0.7 | YGR2 BIO2  | -3.9 | 0.8 |
| YLL06 MMP1  | -8.1 | 0.3 | YDL02 ARP2  | 2.3 | 1.2 | YMR1 TIF3  | -5.2 | 0.8 | YIL11 RP11 | -3.9 | 0.8 |
| YCR0 RSA4   | -8.1 | 0.6 | YKL21 UBA1  | 2.3 | 1.2 | YGL25 MNT1 | -5.2 | 0.7 | YGL01 ATE  | -3.9 | 0.8 |
| YDR1 MKC7   | -8.1 | 0.7 | YPR1 ATG1   | 2.3 | 1.4 | YHR1 GEP4  | -5.2 | 0.7 | YBR0 PHO   | -3.9 | 0.8 |
| YBL10 SRO7  | -8.0 | 0.5 | YBR21 PYC2  | 2.3 | 1.2 | YLR12 -    | -5.2 | 0.5 | YNL24 RPA  | -3.9 | 0.8 |
| YML05 IMD4  | -8.0 | 0.7 | YGR1 -      | 2.3 | 1.2 | YKL11 KT11 | -5.2 | 0.7 | YKL12 PMU  | -3.9 | 0.9 |
| YNR0 FRE4   | -8.0 | 0.4 | YBR2 ABD1   | 2.3 | 1.2 | YOR1 BFR1  | -5.2 | 0.8 | YMR1 NUP   | -3.9 | 0.8 |
| YLR00 NOC3  | -8.0 | 0.7 | YMR1 -      | 2.3 | 1.2 | YNR0 AGA1  | -5.2 | 0.3 | YPL21 NIP7 | -3.9 | 0.8 |
| YOR3 GDH1   | -8.0 | 0.7 | YNL16 FMP4  | 2.3 | 1.3 | YKL20 STE6 | -5.2 | 0.7 | YLR41 CDC  | -3.9 | 0.8 |
| YER0 NUG1   | -8.0 | 0.7 | YCR0 ABP1   | 2.3 | 1.3 | YPR07 NOT1 | -5.2 | 0.7 | YKL03 IXR1 | -3.9 | 0.8 |
| YNL31 EMW1  | -7.9 | 0.7 | YMR3 UBP1   | 2.3 | 1.3 | YNR0 LYS9  | -5.1 | 0.7 | YNR0 RPC   | -3.9 | 0.9 |
| YGR1 RBG2   | -7.9 | 0.7 | YOR1 IDH2   | 2.3 | 1.2 | YNL11 DBP2 | -5.1 | 0.7 | YPL27 ---  | -3.9 | 0.7 |
| YHL01 PRS3  | -7.9 | 0.7 | YPL22 MMT1  | 2.3 | 1.3 | YHR0 CPR2  | -5.1 | 0.7 | YDL04 PRP  | -3.9 | 0.9 |
| YNR0 RPC3   | -7.9 | 0.6 | YBL10 ECM1  | 2.3 | 1.2 | YGR2 FOL2  | -5.1 | 0.8 | YOR3 LDB   | -3.8 | 0.8 |
| YER0 FCY22  | -7.8 | 0.5 | YDR0 ARO1   | 2.3 | 1.2 | YPL08 SEN1 | -5.1 | 0.7 | YOL15 FRE  | -3.8 | 0.4 |
| YBR0 PHO3   | -7.8 | 0.6 | YPL10 MSD1  | 2.3 | 1.2 | YBR1 TOS1  | -5.1 | 0.7 | YJR12 ---  | -3.8 | 0.8 |
| YIL02 HIS6  | -7.8 | 0.5 | YDL05 MCH1  | 2.3 | 1.3 | YBL07 -    | -5.1 | 0.7 | YMR0 MIH1  | -3.8 | 0.9 |
| YIL06 SEE1  | -7.7 | 0.5 | YOL0 C SIN3 | 2.3 | 1.2 | YPR11 MRI1 | -5.1 | 0.8 | YDR3 BCP   | -3.8 | 0.8 |
| YDL03 PUS9  | -7.7 | 0.7 | YBR1 AGP2   | 2.3 | 1.4 | YHR0 STE1  | -5.1 | 0.7 | YIL15 BNR  | -3.8 | 0.8 |
| YHR0 TRM5   | -7.7 | 0.5 | YLR30 HRI1  | 2.3 | 1.2 | YOL05 -    | -5.1 | 0.8 | YNL14 MFA  | -3.8 | 0.8 |
| YNL18 IPI3  | -7.7 | 0.6 | YGL01 JAC1  | 2.3 | 1.4 | YOR0 UFE1  | -5.0 | 0.7 | YFL03 RPL  | -3.8 | 0.8 |
| YML05 TAF13 | -7.7 | 0.6 | YMR1 PSO2   | 2.3 | 1.3 | YPL09 PNG1 | -5.0 | 0.8 | YJL07 PSF  | -3.8 | 0.8 |
| YIL10 SHQ1  | -7.7 | 0.7 | YMR2 TPS3   | 2.3 | 1.2 | YCL05 KRR1 | -5.0 | 0.6 | YBR1 MSI1  | -3.8 | 0.8 |
| YBL05 TOD6  | -7.7 | 0.4 | YGR2 SLI1   | 2.3 | 1.2 | YGR2 TOS2  | -5.0 | 0.6 | YPR11 ---  | -3.8 | 0.9 |
| YMR2 GUA1   | -7.7 | 0.7 | YKL17 NNK1  | 2.3 | 1.3 | YGL04 RNA1 | -5.0 | 0.7 | YOL0 C PHO | -3.8 | 0.8 |

|              |      |     |             |      |     |             |      |     |            |      |      |     |
|--------------|------|-----|-------------|------|-----|-------------|------|-----|------------|------|------|-----|
| YHR16 SOL3   | -7.6 | 0.7 | YJL18:-     | 2.3  | 1.5 | YGR16 TIF46 | -5.0 | 0.7 | YHR16 NSG  | -3.8 | 0.8  |     |
| YDL05 LHP1   | -7.6 | 0.7 | YLR35 ATG3  | 2.3  | 1.5 | YBR22 MCX   | -5.0 | 0.7 | YMR16 TPP  | -3.8 | 0.8  |     |
| YLR21 FRE1   | -7.6 | 0.6 | YER06 THO1  | 2.3  | 1.2 | YKL18-      | -5.0 | 0.6 | YHR01 ARD  | -3.8 | 0.8  |     |
| YBR06 GPI18  | -7.6 | 0.7 | YCR06 RBK1  | 2.3  | 1.3 | YLR19 HCR   | -5.0 | 0.8 | YGR07 PRP  | -3.8 | 0.8  |     |
| YBL06 PRS4   | -7.6 | 0.7 | YDR06 BMH2  | 2.3  | 1.2 | YAL02 SAW   | -4.9 | 0.7 | YNL28 CAF  | -3.8 | 0.8  |     |
| YMR26 HAS1   | -7.5 | 0.5 | YAR02-      | 2.3  | 1.3 | YBL11 YRF1  | -4.9 | 0.7 | YLR02---   | -3.8 | 0.8  |     |
| YJL12 ALB1   | -7.5 | 0.5 | YBL06 PRX1  | 2.3  | 1.4 | YDR54 YRF1  | -4.9 | 0.7 | YJL12 GCD  | -3.8 | 0.8  |     |
| YMR26 RRP5   | -7.5 | 0.7 | YDR46 VPS3  | 2.3  | 1.2 | YEL07 YRF1  | -4.9 | 0.7 | YOR36---   | -3.8 | 0.7  |     |
| YGR16 NSR1   | -7.5 | 0.5 | YFL01-      | 2.2  | 1.3 | YER16 YRF1  | -4.9 | 0.7 | YPL27---   | -3.8 | 0.7  |     |
| YBR24 GPX2   | -7.5 | 0.4 | YJL16 TPK1  | 2.2  | 1.5 | YGR26 YRF1  | -4.9 | 0.7 | YDR12 TRM  | -3.8 | 0.8  |     |
| YDR36 BCP1   | -7.5 | 0.5 | YLL06 AYT1  | 2.2  | 1.3 | YHL05 YRF1  | -4.9 | 0.7 | YBL06 AST  | -3.8 | 0.8  |     |
| YDR56 CAB1   | -7.5 | 0.7 | YLR00 NSE1  | 2.2  | 1.2 | YHR21 YRF1  | -4.9 | 0.7 | YDR26 SUR  | -3.8 | 0.7  |     |
| YJR06 HAM1   | -7.5 | 0.6 | YFR01 FAB1  | 2.2  | 1.2 | YIL177 YRF1 | -4.9 | 0.7 | YPR16 FHL  | -3.8 | 0.8  |     |
| YBR16 YMC2   | -7.4 | 0.5 | YLR25 SYM   | 2.2  | 1.6 | YJL22 YRF1  | -4.9 | 0.7 | YEL03 RAD  | -3.8 | 0.8  |     |
| YOL07 BRX1   | -7.4 | 0.6 | YHR16 SPO1  | 2.2  | 1.2 | YLL06 YRF1  | -4.9 | 0.7 | YLR44 SEC  | -3.8 | 0.9  |     |
| YDL16 FAP7   | -7.4 | 0.7 | YKL21 COS6  | 2.2  | 1.3 | YLL06 YRF1  | -4.9 | 0.7 | YJR14 HMS  | -3.8 | 0.7  |     |
| YKL19 DPH2   | -7.4 | 0.6 | YNL25 RAD6  | 2.2  | 1.3 | YLR46 YRF1  | -4.9 | 0.7 | YKL05 NUP  | -3.8 | 0.8  |     |
| YDR24 PRP26  | -7.3 | 0.6 | YMR26 YKU7  | 2.2  | 1.3 | YLR46 YRF1  | -4.9 | 0.7 | YHR06 BRL  | -3.7 | 0.7  |     |
| YDL01 NOP1   | -7.3 | 0.7 | YGL02 STT3  | 2.2  | 1.2 | YML16-      | -4.9 | 0.7 | YLR38 CSR  | -3.7 | 0.8  |     |
| YKL14 LTV1   | -7.3 | 0.4 | YBR26 PCA1  | 2.2  | 1.4 | YNL33 YRF1  | -4.9 | 0.7 | YML06 GIS4 | -3.7 | 0.8  |     |
| YEL06 SIT1   | -7.3 | 0.2 | YOR26 APL6  | 2.2  | 1.2 | YOR36 YRF1  | -4.9 | 0.7 | YMR16 TIF3 | -3.7 | 0.9  |     |
| YOR06 RK11   | -7.3 | 0.6 | YCR16-      | 2.2  | 1.4 | YPL28 YRF1  | -4.9 | 0.7 | YGR06 SMD  | -3.7 | 0.8  |     |
| YKL18 PRS1   | -7.3 | 0.7 | YAL00 SSA1  | 2.2  | 1.2 | YPR26-      | -4.9 | 0.7 | ---        | ---  | -3.7 | 0.7 |
| YNL17 NOP16  | -7.2 | 0.6 | YKR06-      | 2.2  | 1.3 | YJR01-      | -4.9 | 0.7 | YOL16 PFK  | -3.7 | 0.8  |     |
| YDL11 TRM3   | -7.2 | 0.7 | YGR16 PEX4  | 2.2  | 1.3 | YEL05 MAK   | -4.9 | 0.7 | YML06 GIM  | -3.7 | 0.8  |     |
| YER06 HIS1   | -7.2 | 0.8 | YDR26 VPS6  | 2.2  | 1.3 | YHR06 LRP1  | -4.9 | 0.5 | YNL30 YPT  | -3.7 | 0.8  |     |
| YDR36 UTP5   | -7.2 | 0.5 | YBR06-      | 2.2  | 1.4 | YBR26 APM   | -4.9 | 0.8 | YMR06 PEX  | -3.7 | 0.9  |     |
| YDL12-       | -7.2 | 0.6 | YGR26 COQ1  | 2.2  | 1.4 | YMR26 TRI1  | -4.9 | 0.7 | YER11 SPR  | -3.7 | 0.8  |     |
| YPL00 HAT1   | -7.2 | 0.5 | YIL076 SPO2 | 2.2  | 1.6 | YER06 THO   | -4.9 | 0.7 | YGL06 CDH  | -3.7 | 0.8  |     |
| YJL21 OPT1   | -7.1 | 0.6 | YPR16 TPO3  | 2.2  | 1.2 | YNL23 PDR   | -4.9 | 0.8 | YEL03 MCM  | -3.7 | 0.8  |     |
| YNL20 RIO2   | -7.1 | 0.6 | YDL19 UFD2  | 2.2  | 1.2 | YER01 BIM1  | -4.9 | 0.7 | YLR35 ADE  | -3.7 | 0.8  |     |
| YDR06 DAS2   | -7.1 | 0.7 | YMR06 SEG1  | 2.2  | 1.4 | YNL00 HRB   | -4.9 | 0.8 | YJL17 ATG  | -3.7 | 0.9  |     |
| YNL11 NCS2   | -7.1 | 0.6 | YGL16 MDS   | 2.2  | 1.3 | YBR16 YMC   | -4.9 | 0.6 | YEL02 SNU  | -3.7 | 0.9  |     |
| YCR06 FEN2   | -7.1 | 0.4 | YMR26 ERG6  | 2.2  | 1.2 | YOR16 IES4  | -4.9 | 0.7 | YJL00 CCT  | -3.7 | 0.9  |     |
| YER11 KAP12  | -7.1 | 0.6 | YIL156 GUT2 | 2.2  | 1.2 | YIL086 KTR7 | -4.8 | 0.7 | YMR06 SEC  | -3.7 | 0.8  |     |
| YDR16 TRM82  | -7.1 | 0.6 | YJL17 KRE6  | 2.2  | 1.2 | YFR06 SAD1  | -4.8 | 0.7 | YJR03 GEA  | -3.7 | 0.8  |     |
| YDL08 LUC7   | -7.1 | 0.6 | YIL017 VID2 | 2.2  | 1.3 | YMR16 RRB   | -4.8 | 0.8 | YML01 TRM  | -3.7 | 0.8  |     |
| YNL30 RPL18  | -7.0 | 0.7 | YEL06 NPR2  | 2.2  | 1.2 | YBL11 YRF1  | -4.8 | 0.7 | YOR26 TIM1 | -3.7 | 0.9  |     |
| YKR06 RPC37  | -7.0 | 0.6 | YBL06 KIP1  | 2.2  | 1.2 | YDR54 YRF1  | -4.8 | 0.7 | YNL31---   | -3.7 | 0.9  |     |
| YDR12 TRM1   | -7.0 | 0.5 | YLR08 SMC   | 2.2  | 1.3 | YEL07 YRF1  | -4.8 | 0.7 | YLR01 MEU  | -3.7 | 0.8  |     |
| YGR16 UTP8   | -7.0 | 0.6 | YEL02 GEA2  | 2.2  | 1.2 | YER16 YRF1  | -4.8 | 0.7 | YMR26---   | -3.7 | 0.8  |     |
| YDL20 TRM8   | -7.0 | 0.7 | YIL162 SUC2 | 2.2  | 1.2 | YFL06 YRF1  | -4.8 | 0.7 | YOR16 PNO  | -3.7 | 0.8  |     |
| YHR26 MNL1   | -7.0 | 0.7 | YDR01-      | 2.2  | 1.4 | YGR26 YRF1  | -4.8 | 0.7 | YCL05 KAR  | -3.7 | 0.7  |     |
| YML06 CYB2   | -7.0 | 0.3 | YMR26 BUL1  | 2.2  | 1.2 | YHL05 YRF1  | -4.8 | 0.7 | YKR04 UIP5 | -3.7 | 0.8  |     |
| YEL03 UTR4   | -7.0 | 0.7 | YAL01 MDM   | 2.2  | 1.2 | YHR21-      | -4.8 | 0.7 | YJL06 NUP  | -3.7 | 0.8  |     |
| YDL03 SLM3   | -6.9 | 0.8 | YMR26 ROT1  | 2.2  | 1.3 | YIL177 YRF1 | -4.8 | 0.7 | YKL02 MAK  | -3.7 | 0.8  |     |
| YIL166-      | -6.9 | 0.3 | YKL01 ARC1  | 2.2  | 1.2 | YJL22 YRF1  | -4.8 | 0.7 | YBL08---   | -3.7 | 0.6  |     |
| YOL15 HPF1   | -6.9 | 0.3 | YJR05 PTK2  | 2.2  | 1.2 | YLL06 YRF1  | -4.8 | 0.7 | YMR06 NPL1 | -3.7 | 0.8  |     |
| YDR26 PHM6   | -6.9 | 0.3 | YGR06-      | 2.2  | 1.3 | YLL06 YRF1  | -4.8 | 0.7 | YLR17 DPH  | -3.7 | 0.8  |     |
| YNL02-       | -6.9 | 0.7 | YOR36-      | 2.2  | 1.3 | YLR46 YRF1  | -4.8 | 0.7 | YDR26---   | -3.7 | 0.8  |     |
| YOL01-       | -6.8 | 0.5 | YJR04 CYC1  | ###  | 0.3 | YLR46 YRF1  | -4.8 | 0.7 | YML06 VPS  | -3.6 | 0.8  |     |
| YHR16 GEP4   | -6.8 | 0.6 | YDR46 MFA1  | ###  | 0.3 | YML16-      | -4.8 | 0.7 | YBR16---   | -3.6 | 0.8  |     |
| YJL05 MTR4   | -6.8 | 0.6 | YMR36 FET4  | ###  | 0.3 | YNL33 YRF1  | -4.8 | 0.7 | YLR39 COX  | -3.6 | 0.8  |     |
| YIL091 UTP26 | -6.8 | 0.6 | YLR04-      | ###  | 0.2 | YOR36 YRF1  | -4.8 | 0.7 | YLR05 REX  | -3.6 | 0.8  |     |
| YER06 UTP7   | -6.8 | 0.6 | YBR06 PHO   | ###  | 0.3 | YPL28 YRF1  | -4.8 | 0.7 | YMR06 ARG  | -3.6 | 0.7  |     |
| YNR01 URK1   | -6.8 | 0.7 | YDL22 HO    | ###  | 0.4 | YPR26-      | -4.8 | 0.7 | YOR26 DED  | -3.6 | 0.8  |     |
| YCL03 HIS4   | -6.8 | 0.8 | YHR06 FSH1  | ###  | 0.4 | YLL06 MHT   | -4.8 | 0.6 | YKR06 BAS  | -3.6 | 0.9  |     |
| YOR26 PUS7   | -6.8 | 0.6 | YKL12 OAC   | ###  | 0.3 | YGR06 TIM2  | -4.8 | 0.7 | YCR06 SNT  | -3.6 | 0.8  |     |
| YLR19 PWP1   | -6.8 | 0.6 | YOR16 LEU9  | ###  | 0.5 | YOR26 SRL1  | -4.8 | 0.8 | YOL07 AVO  | -3.6 | 0.8  |     |
| YBL02 NCL1   | -6.8 | 0.7 | YGL16-      | ###  | 0.4 | YOL04 NGL1  | -4.8 | 0.7 | YGR06 MSB  | -3.6 | 0.8  |     |
| YMR26 ABZ2   | -6.8 | 0.7 | YDR26-      | -9.6 | 0.4 | YLR18 TOS2  | -4.8 | 0.7 | YOR16 MTR  | -3.6 | 0.9  |     |
| YDL17 GLT1   | -6.7 | 0.8 | YER07 ALD5  | -9.6 | 0.4 | YNR02 CPR6  | -4.8 | 0.8 | YOL14 RRP  | -3.6 | 0.8  |     |
| YFR06 IRC7   | -6.7 | 0.5 | YER06 MNN   | -9.2 | 0.4 | YPL01 VTC3  | -4.8 | 0.7 | YBR16 SHE  | -3.6 | 0.8  |     |
| YBL07 KT111  | -6.7 | 0.7 | YDR26 PHM6  | -9.1 | 0.2 | YDL20 TRM6  | -4.8 | 0.8 | YGR16 MSM  | -3.6 | 0.9  |     |
| YIL006 URM1  | -6.7 | 0.6 | YOR16 RAS1  | -9.0 | 0.5 | YKL00 DID4  | -4.8 | 0.7 | YLR40---   | -3.6 | 0.8  |     |
| YOL16 ENB1   | -6.7 | 0.3 | YER06 FCY2  | -8.9 | 0.4 | YGR16 NOP   | -4.8 | 0.5 | YHR06 STE  | -3.6 | 0.8  |     |
| YPL08 RPS9   | -6.7 | 0.7 | YJL21 OPT1  | -8.8 | 0.5 | YBR14 SUP2  | -4.8 | 0.8 | YEL04 UTR  | -3.6 | 0.8  |     |
| YGR26 ZPR1   | -6.7 | 0.5 | YBR06 TEC1  | -8.8 | 0.4 | YGR16 GTR2  | -4.7 | 0.8 | YGR16 SKI6 | -3.6 | 0.9  |     |
| YHR06 GPA1   | -6.7 | 0.7 | YHR16 SPL2  | -8.7 | 0.4 | YDL21 SHR   | -4.7 | 0.8 | YHR06 RRP  | -3.6 | 0.8  |     |
| YLR39 AFG2   | -6.6 | 0.7 | YLR04-      | -8.5 | 0.4 | YIL114 POR  | -4.7 | 0.6 | YML06---   | -3.6 | 0.8  |     |
| YKR06 TRM2   | -6.6 | 0.6 | YNL27 MET2  | -8.5 | 0.3 | YPL27 SAM   | -4.7 | 0.8 | YPR17 DPB  | -3.6 | 0.8  |     |

|             |      |     |             |      |     |            |      |     |            |      |     |
|-------------|------|-----|-------------|------|-----|------------|------|-----|------------|------|-----|
| YPL27 SAM4  | -6.6 | 0.7 | YOR16 PNS1  | -8.5 | 0.5 | YDL14 RPN6 | -4.7 | 0.7 | YGL09 SRM  | -3.6 | 0.9 |
| YMR27 RNT1  | -6.6 | 0.5 | YAR07 PHO7  | -8.2 | 0.5 | YMR17 DLT1 | -4.7 | 0.8 | YFR02 CDC  | -3.6 | 0.9 |
| YPL18 RTT10 | -6.6 | 0.7 | YHR27 PHO7  | -8.2 | 0.5 | YOL01 TLG2 | -4.7 | 0.7 | YOR37 TEA  | -3.6 | 0.8 |
| YJR11 -     | -6.6 | 0.6 | YHR12 FUR1  | -8.1 | 0.6 | YAL03 MTW  | -4.7 | 0.7 | YBL00 ---  | -3.6 | 0.9 |
| YOL15 ZPS1  | -6.6 | 0.7 | YJR01 ILV3  | -8.1 | 0.5 | YDR27 CHL4 | -4.7 | 0.7 | YLR26 SEC  | -3.6 | 0.8 |
| YPL19 -     | -6.5 | 0.7 | YIL015 BAR1 | -8.0 | 0.4 | YOR27 ABP1 | -4.7 | 0.7 | YNL20 RTT  | -3.6 | 0.8 |
| YMR17 TIF34 | -6.5 | 0.8 | YKL04 PHD1  | -8.0 | 0.4 | YCL03 STE5 | -4.7 | 0.7 | YNR07 PPG  | -3.6 | 0.9 |
| YKR09 BAS1  | -6.5 | 0.8 | YOR27 DFR1  | -7.9 | 0.6 | YDR11 ALT2 | -4.6 | 0.6 | YKL16 PIR1 | -3.6 | 0.8 |
| YDR47 BNA7  | -6.5 | 0.7 | YLR45 SST2  | -7.9 | 0.4 | YML09 -    | -4.6 | 0.8 | YGL07 RPB  | -3.6 | 0.8 |
| YJR00 SUI2  | -6.5 | 0.7 | YJL15 FAR1  | -7.9 | 0.4 | YMR06 KAR5 | -4.6 | 0.6 | YOR08 TGL1 | -3.6 | 0.8 |
| YBR14 MAK5  | -6.5 | 0.7 | YGL25 ADH4  | -7.6 | 0.6 | YJL00 SYS1 | -4.6 | 0.8 | YDR27 RNH  | -3.6 | 0.9 |
| YPL12 NAN1  | -6.5 | 0.6 | YBR05 PHO7  | -7.3 | 0.5 | YML07 FPR3 | -4.6 | 0.7 | YCR07 CTR  | -3.6 | 0.8 |
| YHR14 IMP3  | -6.5 | 0.6 | YEL04 GLY1  | -7.3 | 0.6 | YJR11 NNF1 | -4.6 | 0.7 | YLR40 ---  | -3.6 | 0.8 |
| YHR09 CIC1  | -6.5 | 0.6 | YMR27 -     | -7.2 | 0.4 | YJR04 POL3 | -4.6 | 0.8 | YOR17 ---  | -3.6 | 0.8 |
| YPL10 ELP4  | -6.5 | 0.7 | YCL02 FUS1  | -7.1 | 0.2 | YDR07 HEM  | -4.6 | 0.8 | YMR17 ---  | -3.6 | 0.8 |
| YJL21 -     | -6.5 | 0.5 | YGL06 LEU1  | -6.9 | 0.5 | YML04 PRM1 | -4.6 | 0.4 | YCL06 VAC  | -3.6 | 0.8 |
| YBR06 ECM2  | -6.5 | 0.5 | YGR16 CLB6  | -6.9 | 0.5 | YPR16 RHO  | -4.6 | 0.8 | YBR25 TRS  | -3.6 | 0.8 |
| YDL13 RGT2  | -6.4 | 0.6 | YKL09 MBR   | -6.8 | 0.5 | YBR04 CST2 | -4.6 | 0.8 | YDR47 SEC  | -3.5 | 0.8 |
| YER04 CAJ1  | -6.4 | 0.8 | YNL14 MFA2  | -6.8 | 0.5 | YJL20 NUC  | -4.6 | 0.8 | YLL01 COX  | -3.5 | 0.7 |
| YNL29 PUS4  | -6.4 | 0.6 | YIL121 QDR  | -6.7 | 0.5 | YPR01 TIF6 | -4.6 | 0.8 | YDL03 PRP  | -3.5 | 0.8 |
| YDL06 TSR1  | -6.4 | 0.6 | YHR06 GPA1  | -6.6 | 0.6 | YDR25 PHM1 | -4.5 | 0.5 | YBL08 ALG  | -3.5 | 0.8 |
| YLR18 EMG1  | -6.4 | 0.7 | YHR06 RRP4  | -6.6 | 0.7 | YGL23 TAN1 | -4.5 | 0.7 | YBL08 ALG  | -3.5 | 0.8 |
| YGL17 ROK1  | -6.4 | 0.5 | YER15 -     | -6.4 | 0.7 | YPR05 TFB4 | -4.5 | 0.7 | YML05 IMD4 | -3.5 | 0.9 |
| YGL23 TAN1  | -6.4 | 0.7 | YLL06 MHT   | -6.4 | 0.5 | YOR06 TSR3 | -4.5 | 0.7 | YDL10 ---  | -3.5 | 0.8 |
| YPL16 -     | -6.4 | 0.7 | YIL115 RPI1 | -6.2 | 0.6 | YMR27 RNA  | -4.5 | 0.7 | YDR15 RPA  | -3.5 | 0.8 |
| YER02 MIG3  | -6.3 | 0.5 | YGL03 AGA2  | -6.2 | 0.4 | YNL22 URE2 | -4.5 | 0.7 | YOR17 SFL  | -3.5 | 0.8 |
| YOL12 HRP1  | -6.3 | 0.7 | YLR06 -     | -6.2 | 0.6 | YLR26 PDR8 | -4.5 | 0.6 | YOR15 LIP5 | -3.5 | 0.8 |
| YEL04 GLY1  | -6.3 | 0.5 | YOL06 MET2  | -6.2 | 0.6 | YDR07 SES1 | -4.5 | 0.8 | YGR17 COC  | -3.5 | 0.9 |
| YLR10 ERG27 | -6.3 | 0.7 | YER12 DSE1  | -6.2 | 0.6 | YMR14 -    | -4.5 | 0.8 | YKR02 GCN  | -3.5 | 0.9 |
| YNL29 TRF5  | -6.3 | 0.7 | YHR26 BAT1  | -6.1 | 0.5 | YPR05 BRR  | -4.5 | 0.8 | YOR27 ---  | -3.5 | 0.9 |
| YKL08 HOT17 | -6.3 | 0.6 | YOR27 STE4  | -6.0 | 0.7 | YGR27 ZPR1 | -4.5 | 0.7 | YDR18 ATC  | -3.5 | 0.8 |
| YBR26 REI1  | -6.2 | 0.6 | YBR27 RRT2  | -6.0 | 0.7 | YER06 NUG  | -4.5 | 0.7 | YOL14 DCP  | -3.5 | 0.8 |
| YPR01 RPA13 | -6.2 | 0.7 | YJR15 PGU   | -6.0 | 0.3 | YOR16 LEU9 | -4.5 | 0.8 | YDR27 ---  | -3.5 | 0.8 |
| YKL21 TRP3  | -6.2 | 0.7 | YER04 MXR   | -6.0 | 0.6 | YER17 RAD2 | -4.5 | 0.7 | YLR22 CCC  | -3.5 | 0.9 |
| YFR03 MET16 | -6.2 | 0.5 | YML02 APT1  | -6.0 | 0.7 | YBR25 MAL3 | -4.5 | 0.5 | YOR37 MRS  | -3.5 | 0.8 |
| YML09 -     | -6.2 | 0.7 | YOR37 -     | -6.0 | 0.6 | YGL21 YPT3 | -4.5 | 0.8 | YNR07 DBP  | -3.5 | 0.8 |
| YNL24 RPA45 | -6.2 | 0.6 | YNL05 COX5  | -6.0 | 0.6 | YJR11 ILM1 | -4.5 | 0.7 | YOR14 ELG  | -3.5 | 0.8 |
| YHR26 SCH9  | -6.2 | 0.7 | YCL03 GFD2  | -5.9 | 0.5 | YCL03 RRP1 | -4.5 | 0.7 | YBR15 RIB7 | -3.5 | 0.8 |
| YLR01 BRE2  | -6.2 | 0.7 | YFL02 STE2  | -5.9 | 0.5 | YER13 GLC7 | -4.5 | 0.7 | YLR28 NNT  | -3.5 | 0.8 |
| YOR27 RRS1  | -6.1 | 0.6 | YKR06 UTP3  | -5.8 | 0.6 | YOL13 CDC  | -4.5 | 0.8 | YJL08 ARP  | -3.5 | 0.8 |
| YGR27 IMA1  | -6.1 | 0.8 | YCL05 KAR4  | -5.8 | 0.5 | YGR26 SER2 | -4.4 | 0.8 | YDL06 UBC  | -3.5 | 0.8 |
| YMR21 -     | -6.1 | 0.7 | YLR34 KAP9  | -5.8 | 0.7 | YDR25 SRP1 | -4.4 | 0.7 | YPR11 RPC  | -3.5 | 0.8 |
| YOR27 FSF1  | -6.1 | 0.8 | YER05 PRS2  | -5.8 | 0.6 | YOL11 MSB4 | -4.4 | 0.7 | YMR27 ---  | -3.5 | 0.9 |
| YGL14 ARO2  | -6.1 | 0.7 | YML05 DUS1  | -5.8 | 0.6 | YDR46 RMT2 | -4.4 | 0.7 | YNL07 MKS  | -3.5 | 0.9 |
| YGR17 PPT1  | -6.1 | 0.6 | YPL24 -     | -5.8 | 0.7 | YMR27 GOT  | -4.4 | 0.8 | YPR18 SMX  | -3.5 | 0.8 |
| YJL09 CHS6  | -6.1 | 0.7 | YJL21 -     | -5.7 | 0.6 | YFL00 VTC2 | -4.4 | 0.7 | YOR27 RPB  | -3.5 | 0.8 |
| YAR05 PRM9  | -6.1 | 0.7 | YGR16 MUP   | -5.7 | 0.5 | YOL09 WRS  | -4.4 | 0.8 | YOR07 ---  | -3.5 | 0.8 |
| YOL14 NOP8  | -6.1 | 0.6 | YMR17 SAS2  | -5.7 | 0.7 | YMR07 ABF2 | -4.4 | 0.8 | YJR11 NNF  | -3.5 | 0.8 |
| YNL01 SPO1  | -6.1 | 0.6 | YLL06 MMP   | -5.7 | 0.4 | YKL04 PRI2 | -4.4 | 0.7 | YNL21 MGS  | -3.5 | 0.8 |
| YDL21 NOP6  | -6.1 | 0.5 | YCR07 RHB1  | -5.6 | 0.7 | YGL03 AGA2 | -4.4 | 0.6 | YKL18 PRS  | -3.5 | 0.9 |
| YLR40 UTP21 | -6.1 | 0.7 | YHR07 -     | -5.6 | 0.5 | YER07 ICP5 | -4.3 | 0.8 | YLR34 KAP  | -3.5 | 0.9 |
| YDR27 RNH27 | -6.0 | 0.8 | YAL04 AIM2  | -5.6 | 0.6 | YOR27 SAS5 | -4.3 | 0.8 | YKL07 ---  | -3.5 | 0.8 |
| YGR14 ENP2  | -6.0 | 0.5 | YOR06 CYT1  | -5.5 | 0.6 | YKL02 MAK  | -4.3 | 0.7 |            |      |     |
| YGR26 ELP2  | -6.0 | 0.6 | YDL04 SIR2  | -5.5 | 0.6 | YNL17 NOP  | -4.3 | 0.8 |            |      |     |
| YLR43 TSR2  | -6.0 | 0.6 | YCR07 MAK   | -5.5 | 0.7 | YBR12 OPY  | -4.3 | 0.6 |            |      |     |
| YLR07 RFU1  | -6.0 | 0.5 | YDR47 TRS3  | -5.5 | 0.7 | YDR15 GIR2 | -4.3 | 0.7 |            |      |     |
| YOR37 NOP58 | -6.0 | 0.7 | YLR39 AFG2  | -5.5 | 0.6 | YBL02 HAP3 | -4.3 | 0.8 |            |      |     |
| YDR06 RRP1  | -6.0 | 0.5 | YLR36 GRX8  | -5.4 | 0.6 | YOR37 SPS4 | -4.3 | 0.5 |            |      |     |
| YOL13 ALR1  | -6.0 | 0.7 | YNR05 BIO4  | -5.4 | 0.6 | YGR15 RSR  | -4.3 | 0.7 |            |      |     |
| YPL15 TGS1  | -6.0 | 0.7 | YOR06 NOB   | -5.4 | 0.6 | YLR20 SEC1 | -4.3 | 0.8 |            |      |     |
| YOR37 RPA43 | -6.0 | 0.7 | YER17 GRX4  | -5.3 | 0.6 | YKR01 YPT5 | -4.3 | 0.8 |            |      |     |
| YML16 -     | -6.0 | 0.7 | YOR04 RSB1  | -5.3 | 0.4 | YHR16 CDC  | -4.3 | 0.8 |            |      |     |
| YJL07 PSF2  | -6.0 | 0.7 | YBL06 PRS4  | -5.3 | 0.7 | YCL05 KAR4 | -4.3 | 0.7 |            |      |     |
| YJL10 PRM16 | -6.0 | 0.3 | YNL11 DBP2  | -5.2 | 0.6 | YNL20 RTT1 | -4.3 | 0.8 |            |      |     |
| YLL05 FRE6  | -5.9 | 0.7 | YDL24 LRG1  | -5.2 | 0.6 | YDL21 NOP6 | -4.3 | 0.6 |            |      |     |
| YCL03 GFD2  | -5.9 | 0.7 | YEL01 EDC3  | -5.2 | 0.6 | YLR10 SEN2 | -4.3 | 0.8 |            |      |     |
| YBL11 YRF1- | -5.9 | 0.4 | YLR41 -     | -5.1 | 0.6 | YJL01 CCT3 | -4.3 | 0.8 |            |      |     |
| YDR54 YRF1- | -5.9 | 0.4 | YOR16 RGS2  | -5.1 | 0.4 | YPL25 HFI1 | -4.3 | 0.8 |            |      |     |
| YER15 YRF1- | -5.9 | 0.4 | YGR17 CYS4  | -5.1 | 0.7 | YDL04 PRP1 | -4.2 | 0.8 |            |      |     |
| YFL06 YRF1- | -5.9 | 0.4 | YPL01 VTC3  | -5.1 | 0.6 | YPR03 ERV2 | -4.2 | 0.8 |            |      |     |
| YGR25 YRF1- | -5.9 | 0.4 | YER16 -     | -5.1 | 0.5 | YLR35 ILV5 | -4.2 | 0.7 |            |      |     |



|              |      |     |             |      |     |             |      |     |
|--------------|------|-----|-------------|------|-----|-------------|------|-----|
| YHL04 YRF1-  | -5.9 | 0.4 | YNR0( NRM   | -5.1 | 0.6 | YMR1( HLJ1  | -4.2 | 0.7 |
| YHR21-       | -5.9 | 0.4 | YDR3( HXT7  | -5.0 | 0.4 | YBR0( RXT2  | -4.2 | 0.7 |
| YIL17( YRF1- | -5.9 | 0.4 | YDR3( HXT6  | -5.0 | 0.4 | YDL20 NHP2  | -4.2 | 0.7 |
| YJL22( YRF1- | -5.9 | 0.4 | YNL06 GCD   | -5.0 | 0.7 | YLR03 RSC2  | -4.2 | 0.6 |
| YLL06 YRF1-  | -5.9 | 0.4 | YEL00 YEA2  | -5.0 | 0.7 | YGR0( MUQ   | -4.2 | 0.8 |
| YLL06 YRF1-  | -5.9 | 0.4 | YPL27 SAM4  | -5.0 | 0.7 | YLR36 RPS2  | -4.2 | 0.7 |
| YLR46 YRF1-  | -5.9 | 0.4 | YGR2( -     | -5.0 | 0.6 | YLR28 NNT1  | -4.2 | 0.8 |
| YML1( -      | -5.9 | 0.4 | YML04 PRM1  | -4.9 | 0.4 | YLR41 CDC1  | -4.2 | 0.8 |
| YNL33 YRF1-  | -5.9 | 0.4 | YKL02 -     | -4.9 | 0.7 | YLR17 CBF2  | -4.2 | 0.7 |
| YPL28 YRF1-  | -5.9 | 0.4 | YHR1( DBP2  | -4.9 | 0.6 | YDR3( SVF1  | -4.2 | 0.7 |
| YPR2( -      | -5.9 | 0.4 | YOR0( TSR3  | -4.9 | 0.7 | YDR4( RPN2  | -4.2 | 0.8 |
| YHR1( DBP8   | -5.9 | 0.6 | YDR4( ERD1  | -4.9 | 0.7 | YBR24 -     | -4.2 | 0.7 |
| YDR0( KRS1   | -5.9 | 0.7 | YIL04( APQ1 | -4.9 | 0.7 | YOR1( SER1  | -4.2 | 0.8 |
| YJR00 MPP1(  | -5.9 | 0.5 | YLR24 -     | -4.9 | 0.7 | YER0( GCD   | -4.1 | 0.8 |
| YOL0( APM4   | -5.9 | 0.8 | YJL01( VTC4 | -4.8 | 0.6 | YIL01( PDR1 | -4.1 | 0.8 |
| YBR2( HIS7   | -5.9 | 0.7 | YDR4( SYF1  | -4.8 | 0.6 | YNL24 VPS7  | -4.1 | 0.8 |
| YFR0( PHO4   | -5.9 | 0.6 | YJR07 LIA1  | -4.8 | 0.7 | YGR0( -     | -4.1 | 0.5 |
| YIL01( FAF1  | -5.9 | 0.4 | YIL10( SHQ1 | -4.8 | 0.7 | YOR0( CKB2  | -4.1 | 0.8 |
| YNL23 -      | -5.8 | 0.6 | YLR18 EMG   | -4.8 | 0.7 | YMR2( INP1  | -4.1 | 0.7 |
| YML0( APT1   | -5.8 | 0.7 | YNL29 PUS4  | -4.8 | 0.6 | YOL1( TPT1  | -4.1 | 0.7 |
| YDL04 PRP11  | -5.8 | 0.8 | YNL14 AAH1  | -4.8 | 0.7 | YDR1( TAF1  | -4.1 | 0.7 |
| YGL12 PRP4(  | -5.8 | 0.7 | YGL21 SKI8  | -4.8 | 0.7 | YLR00 CMS   | -4.1 | 0.6 |
| YOR3( ALA1   | -5.8 | 0.8 | YPL18 RTT1  | -4.7 | 0.7 | YLR14 SPE4  | -4.1 | 0.7 |
| YOR0( TMA4(  | -5.8 | 0.7 | YOL01 RCL1  | -4.7 | 0.6 | YAL06 PAU2  | -4.1 | 0.6 |
| YLR45 SST2   | -5.8 | 0.6 | YDL24 -     | -4.7 | 0.7 | YBL10 PAU2  | -4.1 | 0.6 |
| YNL21 RAP1   | -5.8 | 0.7 | YGR0( -     | -4.7 | 0.6 | YDR5( PAU1  | -4.1 | 0.6 |
| YMR1( -      | -5.8 | 0.7 | YKL09 CUE2  | -4.7 | 0.7 | YGL2( PAU1  | -4.1 | 0.6 |
| YOL12 TRM1(  | -5.8 | 0.7 | YNR0( -     | -4.7 | 0.7 | YGR2( PAU1  | -4.1 | 0.6 |
| YCR0( PWP2   | -5.8 | 0.6 | YLR14 SPE4  | -4.6 | 0.6 | YHL04 PAU1  | -4.1 | 0.6 |
| YKL11 KT112  | -5.8 | 0.7 | YGR1( -     | -4.6 | 0.2 | YHR1( SPO   | -4.1 | 0.8 |
| YDR3( KEI1   | -5.8 | 0.7 | YGR1( -     | -4.6 | 0.2 | YLR42 URA4  | -4.1 | 0.7 |
| YOR0( -      | -5.8 | 0.7 | YIL08( -    | -4.6 | 0.2 | YPR0( MAK1  | -4.0 | 0.7 |
| YDR2( SRP1(  | -5.8 | 0.6 | YIL08( -    | -4.6 | 0.2 | YOL07 BRX1  | -4.0 | 0.7 |
| YGR0( -      | -5.7 | 0.4 | YOR0( RKI1  | -4.6 | 0.7 | YER0( HMF1  | -4.0 | 0.8 |
| YKL10 AAT1   | -5.7 | 0.7 | YCL02 -     | -4.5 | 0.6 | YFR0( RSC2  | -4.0 | 0.7 |
| YDR1( ARX1   | -5.7 | 0.6 | YHR1( TRR2  | -4.5 | 0.7 | YGL0( USE1  | -4.0 | 0.6 |
| YOR1( MCA1   | -5.7 | 0.8 | YOL0( SPE2  | -4.5 | 0.7 | YCR01 -     | -4.0 | 0.6 |
| YNL06 NOP2   | -5.7 | 0.6 | YDR1( -     | -4.5 | 0.7 | YOR2( AIM4  | -4.0 | 0.8 |
| YJR04 URB2   | -5.7 | 0.7 | YJL19( ELO1 | -4.5 | 0.6 | YKL12 SRP2  | -4.0 | 0.6 |
| YHR1( FUR1   | -5.7 | 0.8 | YKL13 RMA1  | -4.5 | 0.6 | YFL02 GYP2  | -4.0 | 0.7 |
| YHL03 EFM1   | -5.7 | 0.6 | YIR02( YVH1 | -4.5 | 0.8 | YBL01 FUS3  | -4.0 | 0.6 |
| YDR0( FAL1   | -5.7 | 0.6 | YHR0( IPI1  | -4.5 | 0.6 | YBR0( PHO1  | -4.0 | 0.7 |
| YJR09 JJJ3   | -5.7 | 0.6 | YPL08 RPS2  | -4.5 | 0.7 | YBL11 YRF1  | -4.0 | 0.3 |
| YNL07 IMP4   | -5.7 | 0.6 | YCR07( RSA4 | -4.5 | 0.6 | YBL11 YRF1  | -4.0 | 0.3 |
| YGR1( NOP7   | -5.7 | 0.5 | YJL12( GCD  | -4.5 | 0.7 | YDR5( YRF1  | -4.0 | 0.3 |
| YLR10 SEN2   | -5.7 | 0.8 | YJR14 HMS1  | -4.4 | 0.6 | YEL07 YRF1  | -4.0 | 0.3 |
| YDR4( RRP17  | -5.7 | 0.6 | YPR12( CLB5 | -4.4 | 0.7 | YER1( YRF1  | -4.0 | 0.3 |
| YCL05 KRR1   | -5.6 | 0.6 | YDR4( APT2  | -4.4 | 0.7 | YGR2( YRF1  | -4.0 | 0.3 |
| YKL12 PGM1   | -5.6 | 0.6 | YNL04 -     | -4.4 | 0.2 | YHR21( YRF1 | -4.0 | 0.3 |
| YER17 GRX4   | -5.6 | 0.6 | YOL01 -     | -4.4 | 0.2 | YHR21( YRF1 | -4.0 | 0.3 |
| YDL03 DBP1(  | -5.6 | 0.6 | YOR0( -     | -4.4 | 0.2 | YIL17( YRF1 | -4.0 | 0.3 |
| YDR2( CIA1   | -5.6 | 0.8 | YOR3( VTS1  | -4.4 | 0.6 | YJL22( YRF1 | -4.0 | 0.3 |
| YJL11 CCT7   | -5.6 | 0.6 | YPL27 SAM1  | -4.4 | 0.7 | YLL06( YRF1 | -4.0 | 0.3 |
| YGR2( RTA1   | -5.6 | 0.4 | YMR0( -     | -4.4 | 0.6 | YLR06( YRF1 | -4.0 | 0.3 |
| YDL11 RRP4(  | -5.6 | 0.8 | YNR0( NOG1  | -4.3 | 0.6 | YLR46 YRF1  | -4.0 | 0.3 |
| YBR1( CNS1   | -5.6 | 0.6 | YML0( TEM1  | -4.3 | 0.7 | YLR46 YRF1  | -4.0 | 0.3 |
| YDR1( ALT2   | -5.6 | 0.5 | YGR0( -     | -4.3 | 0.5 | YML1( -     | -4.0 | 0.3 |
| YMR3( ADH6   | -5.6 | 0.7 | YOL04 NGL1  | -4.3 | 0.7 | YNL33 YRF1  | -4.0 | 0.3 |
| YLR22 ECM2(  | -5.6 | 0.7 | YNL11 NCS2  | -4.3 | 0.6 | YOR3( YRF1  | -4.0 | 0.3 |
| YDR3( HPT1   | -5.6 | 0.6 | YBR2( REI1  | -4.3 | 0.6 | YPL28 YRF1  | -4.0 | 0.3 |
| YNL13 KRE3(  | -5.6 | 0.7 | YOL14 ARG1  | -4.3 | 0.7 | YPR2( -     | -4.0 | 0.3 |
| YPL05 PDR1(  | -5.6 | 0.5 | YDL00 PTC1  | -4.3 | 0.7 | YLL00( MMM  | -4.0 | 0.7 |
| YLR01 MEU1   | -5.5 | 0.7 | YKL12 RRN1  | -4.3 | 0.7 | YHR0( GAR   | -4.0 | 0.7 |
| YCR0( BUD2(  | -5.5 | 0.7 | YOR3( -     | -4.3 | 0.5 | YBR2( ARO1  | -4.0 | 0.7 |
| YPR01 TIF6   | -5.5 | 0.8 | YBR0( TRM1  | -4.3 | 0.7 | YCR1( RDS1  | -4.0 | 0.6 |
| YPL01 RRP1(  | -5.5 | 0.6 | YLR02 SDO1  | -4.3 | 0.7 | YLL04( ATG1 | -4.0 | 0.7 |
| YER1( LCP5   | -5.5 | 0.6 | YDL12 VCX1  | -4.3 | 0.7 | YDL10 NSE4  | -4.0 | 0.7 |
| YPL09 NOG1   | -5.5 | 0.6 | YML0( IMD4  | -4.3 | 0.8 | YLR08 EMP1  | -3.9 | 0.8 |
| YOL04 NOP1(  | -5.5 | 0.6 | YBR0( HMT1  | -4.3 | 0.7 | YGL07 RPB2  | -3.9 | 0.8 |
| YML01 TRM9   | -5.4 | 0.7 | YKL07 DHR2  | -4.2 | 0.7 | YOL01 -     | -3.9 | 0.7 |
| YDR3( SBE2   | -5.4 | 0.8 | YDR1( ATC1  | -4.2 | 0.6 | YKL11 VPH2  | -3.9 | 0.7 |

|       |       |      |     |       |      |      |     |        |      |      |     |
|-------|-------|------|-----|-------|------|------|-----|--------|------|------|-----|
| YOR1  | RIO1  | -5.4 | 0.6 | YGR1  | PPT1 | -4.2 | 0.7 | YBL11  | -    | -3.9 | 0.6 |
| YOL01 | RCL1  | -5.4 | 0.7 | YER1  | GLE2 | -4.2 | 0.8 | YDR5   | -    | -3.9 | 0.6 |
| YPL21 | NIP7  | -5.4 | 0.6 | YOR2  | YTM1 | -4.2 | 0.7 | YEL07  | -    | -3.9 | 0.6 |
| YPL20 | TYW1  | -5.4 | 0.7 | YPL10 | ELP4 | -4.2 | 0.7 | YER1   | -    | -3.9 | 0.6 |
| YDR0  | SNF11 | -5.4 | 0.7 | YHR1  | THP2 | -4.2 | 0.7 | YFL06  | -    | -3.9 | 0.6 |
| YIR03 | -     | -5.4 | 0.6 | YAL05 | ECM  | -4.2 | 0.5 | YGR2   | -    | -3.9 | 0.6 |
| YBR0  | TRM7  | -5.4 | 0.7 | YDL16 | CDC  | -4.2 | 0.7 | YHL05  | -    | -3.9 | 0.6 |
| YBR1  | SUP4  | -5.4 | 0.8 | YGR1  | CLB1 | -4.2 | 0.7 | YHR21  | -    | -3.9 | 0.6 |
| YJR14 | HMS2  | -5.4 | 0.6 | YGR1  | -    | -4.2 | 0.4 | YIL177 | -    | -3.9 | 0.6 |
| YDR2  | MNN1  | -5.4 | 0.8 | YHR1  | RIX1 | -4.2 | 0.7 | YJL22  | -    | -3.9 | 0.6 |
| YLR12 | DIP2  | -5.3 | 0.7 | YGL0  | LSG1 | -4.1 | 0.7 | YLL06  | -    | -3.9 | 0.6 |
| YPR0  | TAH1  | -5.3 | 0.7 | YOR2  | CLP1 | -4.1 | 0.8 | YLL06  | -    | -3.9 | 0.6 |
| YDR0  | RRP8  | -5.3 | 0.6 | YGR0  | THG1 | -4.1 | 0.7 | YLR46  | -    | -3.9 | 0.6 |
| YHR1  | -     | -5.3 | 0.7 | YNR0  | -    | -4.1 | 0.6 | YLR46  | -    | -3.9 | 0.6 |
| YDL14 | NOP1  | -5.3 | 0.6 | YIL13 | FLX1 | -4.1 | 0.7 | YML1   | -    | -3.9 | 0.6 |
| YOL0  | WRS1  | -5.3 | 0.7 | YDR2  | RNH  | -4.1 | 0.7 | YNL33  | -    | -3.9 | 0.6 |
| YPR0  | ASA1  | -5.3 | 0.7 | YKL20 | STE6 | -4.1 | 0.7 | YOR3   | -    | -3.9 | 0.6 |
| YOL0  | SPE2  | -5.3 | 0.7 | YPR0  | TFB4 | -4.1 | 0.7 | YPL28  | -    | -3.9 | 0.6 |
| YMR0  | -     | -5.3 | 0.4 | YER07 | PTP3 | -4.1 | 0.7 | YPR2   | -    | -3.9 | 0.6 |
| YLR14 | SPE4  | -5.3 | 0.7 | YOL1  | YGK  | -4.1 | 0.7 | YLR42  | RPN  | -3.9 | 0.7 |
| YDL06 | -     | -5.3 | 0.6 | YBR0  | RFC  | -4.1 | 0.7 | YGL0   | COG  | -3.9 | 0.7 |
| YOL07 | NBA1  | -5.3 | 0.6 | YDR2  | LYS4 | -4.0 | 0.8 | YDR41  | RRP  | -3.9 | 0.7 |
| YAL03 | RBG1  | -5.2 | 0.7 | YKL01 | SWD  | -4.0 | 0.7 | YPR0   | TIF5 | -3.9 | 0.8 |
| YGL0  | LSG1  | -5.2 | 0.7 | YDR4  | IZH1 | -4.0 | 0.7 | YJR00  | -    | -3.9 | 0.7 |
| YOR0  | CIN5  | -5.2 | 0.7 | YHR0  | RPP1 | -4.0 | 0.7 | YKR07  | -    | -3.9 | 0.7 |
| YNR0  | NOG2  | -5.2 | 0.6 | YOR3  | CIR2 | -4.0 | 0.8 | YDR37  | VPS7 | -3.9 | 0.7 |
| YPL04 | NOP4  | -5.2 | 0.6 | YIL08 | KTR7 | -4.0 | 0.7 | YOR2   | RUD  | -3.9 | 0.8 |
| YAL01 | CYS3  | -5.2 | 0.8 | YMR3  | SAM  | -4.0 | 0.7 | YBL08  | ALG  | -3.9 | 0.8 |
| YOR0  | UTP2  | -5.2 | 0.6 | YPL27 | SAM  | -4.0 | 0.7 | YBL08  | ALG  | -3.9 | 0.8 |
| YDR4  | TRS31 | -5.2 | 0.8 | YDL20 | TRM  | -4.0 | 0.8 | YLR32  | SFH1 | -3.9 | 0.8 |
| YLR38 | CSR1  | -5.2 | 0.7 | YHR0  | QCR  | -4.0 | 0.7 | YMR3   | FET4 | -3.9 | 0.8 |
| YNL15 | RPC3  | -5.2 | 0.7 | YKL06 | -    | -4.0 | 0.6 | YKL18  | SPE1 | -3.9 | 0.8 |
| YJL13 | YUR1  | -5.2 | 0.7 | YDR2  | MET  | -3.9 | 0.5 | YMR0   | ARP  | -3.9 | 0.8 |
| YHR0  | IPI1  | -5.2 | 0.6 | YGR0  | TPC1 | -3.9 | 0.7 | YAR0   | SEN  | -3.9 | 0.8 |
| YML0  | TRM1  | -5.2 | 0.8 | YLR39 | COX  | -3.9 | 0.8 | YOR3   | ALA1 | -3.9 | 0.8 |
| YLR28 | -     | -5.2 | 0.7 | YJL01 | RPC1 | -3.9 | 0.5 | YHR1   | -    | -3.9 | 0.8 |
| YJR13 | NMD5  | -5.2 | 0.7 | YDR1  | TRM  | -3.9 | 0.7 | YJR01  | TMA  | -3.9 | 0.8 |
| YGL0  | TYW3  | -5.2 | 0.7 | YPL19 | -    | -3.9 | 0.8 | YKR0   | RPC  | -3.9 | 0.7 |
| YGR1  | MTR3  | -5.2 | 0.7 | YDR2  | SNU  | -3.9 | 0.7 | YER0   | FCY2 | -3.9 | 0.7 |
| YOL1  | BDS1  | -5.2 | 0.7 | YPL03 | MET  | -3.9 | 0.7 | YLL05  | FRE  | -3.9 | 0.8 |
| YIL10 | DPH1  | -5.2 | 0.7 | YLR32 | NMA  | -3.9 | 0.8 | YNR0   | -    | -3.9 | 0.8 |
| YNL12 | NRK1  | -5.1 | 0.7 | YKR0  | PCC1 | -3.9 | 0.8 | YNL21  | -    | -3.9 | 0.8 |
| YNL22 | ADE1  | -5.1 | 0.8 | YPL05 | PDR1 | -3.9 | 0.6 | YBR0   | RFC  | -3.9 | 0.8 |
| YDL12 | VCX1  | -5.1 | 0.7 | YLR21 | CLB4 | -3.9 | 0.7 | YKL16  | TPK  | -3.9 | 0.7 |
| YHR1  | UTP9  | -5.1 | 0.6 | YJR10 | RSM  | -3.9 | 0.7 | YDR2   | ATP  | -3.9 | 0.8 |
| YBL05 | -     | -5.1 | 0.7 | YBR0  | TAT1 | -3.9 | 0.7 | YGL15  | CDC  | -3.9 | 0.8 |
| YLR00 | CMS1  | -5.1 | 0.6 | YLR38 | REH1 | -3.9 | 0.8 | YOL1   | WSC  | -3.9 | 0.8 |
| YBR1  | POP7  | -5.1 | 0.8 | YKR0  | TRM  | -3.9 | 0.7 | YKL04  | VPS2 | -3.9 | 0.8 |
| YPR1  | NOC4  | -5.1 | 0.6 | YOR0  | UTP2 | -3.8 | 0.7 | YDR2   | -    | -3.9 | 0.6 |
| YMR0  | UTP1  | -5.1 | 0.7 | YPL26 | ACM  | -3.8 | 0.7 | YPL23  | RVB  | -3.9 | 0.8 |
| YLL01 | SOF1  | -5.1 | 0.6 | YKL10 | HAP  | -3.8 | 0.7 | YOR0   | ATX2 | -3.8 | 0.8 |
| YMR2  | ERG2  | -5.1 | 0.8 | YBR1  | GDT1 | -3.8 | 0.7 | YKR0   | PCC  | -3.8 | 0.8 |
| YAL02 | SAW1  | -5.1 | 0.7 | YBL01 | FUS  | -3.8 | 0.6 | YDL05  | PBP  | -3.8 | 0.8 |
| YGL2  | ZRT1  | -5.1 | 0.5 | YHR0  | HXT1 | -3.8 | 0.7 | YLR26  | YPT  | -3.8 | 0.6 |
| YPL08 | SEN5  | -5.1 | 0.7 | YJR14 | -    | -3.8 | 0.6 | YOL12  | HRP  | -3.8 | 0.7 |
| YKL14 | RPC2  | -5.1 | 0.7 | YLR35 | ILV5 | -3.8 | 0.8 | YCR1   | AAD  | -3.8 | 0.8 |
| YPL08 | ELP3  | -5.1 | 0.8 | YDL11 | RRP  | -3.8 | 0.8 | YDL09  | SRP1 | -3.8 | 0.8 |
| YDR5  | SAM2  | -5.1 | 0.7 | YOL11 | PAP2 | -3.8 | 0.7 | YGL1   | SEH1 | -3.8 | 0.8 |
| YDR2  | BFR2  | -5.1 | 0.6 | YHR0  | HXT4 | -3.8 | 0.3 | YBR0   | TRM  | -3.8 | 0.8 |
| YOL0  | PRS5  | -5.0 | 0.7 | YNL24 | SUI1 | -3.8 | 0.8 | YPR1   | RPN  | -3.8 | 0.8 |
| YDR1  | ATC1  | -5.0 | 0.7 | YJL17 | ATG  | -3.8 | 0.8 | YDR2   | RTT1 | -3.8 | 0.7 |
| YEL04 | TCA17 | -5.0 | 0.7 | YER1  | CHD  | -3.8 | 0.7 | YPL10  | -    | -3.8 | 0.8 |
| YNL06 | YDJ1  | -5.0 | 0.8 | YDL05 | LHP1 | -3.8 | 0.8 | YBR21  | -    | -3.8 | 0.8 |
| YLL00 | MMM1  | -5.0 | 0.7 | YGR0  | SLX9 | -3.8 | 0.7 | YBR2   | -    | -3.8 | 0.8 |
| YJL01 | CCT3  | -5.0 | 0.7 | YDR17 | RSM  | -3.8 | 0.7 | YBR2   | -    | -3.8 | 0.8 |
| YDL15 | SAS1  | -5.0 | 0.5 | YJR11 | NNF1 | -3.8 | 0.7 | YGL1   | SUT1 | -3.8 | 0.8 |
| YLR40 | DUS3  | -5.0 | 0.6 | YOR1  | SFL1 | -3.7 | 0.7 | YPL21  | PUS1 | -3.8 | 0.7 |
| YNL14 | PGA2  | -5.0 | 0.7 | YGR2  | PHO  | -3.7 | 0.7 | YBL05  | SEC1 | -3.8 | 0.8 |
| YJL01 | NOP9  | -5.0 | 0.6 | YDR07 | IPT1 | -3.7 | 0.8 | YJR01  | SPC1 | -3.8 | 0.8 |
| YJR02 | MDE1  | -5.0 | 0.7 | YDR5  | PAD1 | -3.7 | 0.6 | YLR38  | REH  | -3.8 | 0.8 |
| YER0  | ARB1  | -5.0 | 0.7 | YDR0  | FAL1 | -3.7 | 0.7 | YPL15  | PRM  | -3.8 | 0.7 |

|             |      |     |             |      |     |             |      |     |
|-------------|------|-----|-------------|------|-----|-------------|------|-----|
| YJR07 NPA3  | -5.0 | 0.8 | YBR02 OLA1  | -3.7 | 0.8 | YGL25 ZRT1  | -3.8 | 0.6 |
| YNL16 IBD2  | -5.0 | 0.6 | YGL02 SCW   | -3.7 | 0.7 | YOR26 PAC1  | -3.8 | 0.8 |
| YGL12 NAB2  | -5.0 | 0.7 | YNL21 PEX1  | -3.7 | 0.7 | YOL06 MET2  | -3.8 | 0.8 |
| YPR11 RPC4C | -5.0 | 0.7 | YOL15 GRE2  | -3.7 | 0.7 | YBR21 AME1  | -3.8 | 0.8 |
| YLR24-      | -5.0 | 0.7 | YNL28 CAF4  | -3.7 | 0.7 | YPL05 ARL3  | -3.7 | 0.7 |
| YBR22-      | -5.0 | 0.5 | YDR26 NSE3  | -3.7 | 0.7 | YHR12 YCK1  | -3.7 | 0.8 |
| YMR01 ADI1  | -5.0 | 0.6 | YJR01-      | -3.7 | 0.7 | YLR36 NMD1  | -3.7 | 0.8 |
| YLL03 RIX7  | -5.0 | 0.6 | YIL106 DPH1 | -3.7 | 0.7 | YDR36 YRA1  | -3.7 | 0.8 |
| YMR31 ELP6  | -4.9 | 0.8 | YJL18-      | -3.7 | 0.7 | YML01 SPT5  | -3.7 | 0.8 |
| YDR41 UTP6  | -4.9 | 0.6 | YMR01 MIC1  | -3.7 | 0.8 | YDR06 RRP6  | -3.7 | 0.6 |
| YLR35 ADE13 | -4.9 | 0.8 | YNL10 AIM3  | -3.7 | 0.7 | YNR06-      | -3.7 | 0.6 |
| YOR31 RPA15 | -4.9 | 0.8 | YDR11 ALT2  | -3.7 | 0.6 | YDR31 HNT2  | -3.7 | 0.8 |
| YPL11 PEX25 | -4.9 | 0.7 | YNL23 CSL4  | -3.7 | 0.7 | YPL21 SRP7  | -3.7 | 0.7 |
| YBR24-      | -4.9 | 0.7 | YLR13 ZRT2  | -3.7 | 0.8 | YHR12 LSM1  | -3.7 | 0.8 |
| YKR02 UIP5  | -4.9 | 0.7 | YPR01 TIF6  | -3.7 | 0.8 | YGR06 ADE6  | -3.7 | 0.8 |
| YMR01 PEX12 | -4.9 | 0.7 | YJL13 LCB3  | -3.7 | 0.8 | YPR16 RPO1  | -3.7 | 0.8 |
| YGR01 VHT1  | -4.9 | 0.5 | YBR01 RER2  | -3.7 | 0.7 | YER12 RTR1  | -3.7 | 0.8 |
| YGR21 BIO2  | -4.9 | 0.7 | YNL02-      | -3.7 | 0.8 | YBL03 URA7  | -3.7 | 0.8 |
| YKL16 TPK3  | -4.9 | 0.7 | YPL18 POS6  | -3.6 | 0.7 | YGL12 NAB2  | -3.7 | 0.8 |
| YPR16 RPC82 | -4.9 | 0.6 | YLR18 SAM1  | -3.6 | 0.7 | YPL23 SUI3  | -3.7 | 0.8 |
| YIR01 SQT1  | -4.9 | 0.6 | YBR11 FES1  | -3.6 | 0.8 | YLL06 AYT1  | -3.7 | 0.7 |
| YLR00 RLP24 | -4.9 | 0.7 | YLR41 BER1  | -3.6 | 0.7 | YPR16 JIP5  | -3.7 | 0.8 |
| YGR11-      | -4.9 | 0.7 | YAL03 POP6  | -3.6 | 0.7 | YDR46 VPS6  | -3.7 | 0.8 |
| YLR33 SGD1  | -4.8 | 0.6 | YFR01 NIC91 | -3.6 | 0.8 | YML01 OST6  | -3.7 | 0.8 |
| YDR11 INO2  | -4.8 | 0.7 | YKR06 OMA   | -3.6 | 0.7 | YCR02 FEN2  | -3.7 | 0.7 |
| YAL02 MAK16 | -4.8 | 0.5 | YML06-      | -3.6 | 0.8 | YDR12 TRM1  | -3.7 | 0.7 |
| YMR21 ZRC1  | -4.8 | 0.8 | YHR07 TRM6  | -3.6 | 0.7 | YDR52 AGE1  | -3.7 | 0.8 |
| YOR21 TMA16 | -4.8 | 0.6 | YBR16-      | -3.6 | 0.6 | YML11 URA6  | -3.7 | 0.8 |
| YGR21 PEX21 | -4.8 | 0.7 | YOL02 DIS3  | -3.6 | 0.8 | YNL05 OCA1  | -3.6 | 0.8 |
| YPR16 TIF3  | -4.8 | 0.8 | YPR06 ARO1  | -3.6 | 0.7 | YDL00 MED1  | -3.6 | 0.7 |
| YPL15 PRP46 | -4.8 | 0.8 | YLR45-      | -3.6 | 0.8 | YNL24 RPA4  | -3.6 | 0.8 |
| YMR31 ATM1  | -4.8 | 0.8 | YHR16 UTP9  | -3.6 | 0.6 | YBR27 EFM2  | -3.6 | 0.8 |
| YNL21 IES2  | -4.8 | 0.7 | YLR10 SEN2  | -3.6 | 0.8 | YER14-      | -3.6 | 0.8 |
| YER01 TPA1  | -4.8 | 0.7 | YOL01 PHO6  | -3.6 | 0.8 | YIR00 DJP1  | -3.6 | 0.8 |
| YLL05 AQY2  | -4.8 | 0.6 | YDR06 RRP1  | -3.6 | 0.7 | YDR11-      | -3.6 | 0.7 |
| YMR21 ERG8  | -4.8 | 0.8 | YML02 NSE5  | -3.6 | 0.7 | YDL24 LRG1  | -3.6 | 0.7 |
| YGR21-      | -4.8 | 0.7 | YGR01 PAC1  | -3.6 | 0.8 | YHR14 CRP1  | -3.6 | 0.6 |
| YPR01 TIF5  | -4.8 | 0.8 | YBR27 EFM2  | -3.6 | 0.7 | YOR31 NOP1  | -3.6 | 0.8 |
| YJL14 RPA34 | -4.8 | 0.6 | YGR11 HGH1  | -3.6 | 0.8 | YPL12 HHO   | -3.6 | 0.8 |
| YGR21-      | -4.8 | 0.7 | YNL27-      | -3.6 | 0.5 | YPL20 TYW   | -3.6 | 0.8 |
| YLR07 XYL2  | -4.8 | 0.6 | YMR11 DLT1  | -3.6 | 0.8 | YIL005 EPS1 | -3.6 | 0.8 |
| YDL03 PRM7  | -4.8 | 0.4 | YLR25-      | -3.6 | 0.8 | YIL076 THS1 | -3.6 | 0.8 |
| YAR01 SEN34 | -4.8 | 0.7 | YLR00 NOC1  | -3.5 | 0.8 | YBR05 MUM   | -3.6 | 0.7 |
| YLR31 TAD3  | -4.8 | 0.8 | YNL07 IMP4  | -3.5 | 0.7 | YLR43 TSR2  | -3.6 | 0.7 |
| YOL04 NGL1  | -4.7 | 0.8 | YHR06 MED1  | -3.5 | 0.8 | YDR06 LCB2  | -3.6 | 0.8 |
| YNL11 NOP15 | -4.7 | 0.6 | YMR21 RNH1  | -3.5 | 0.7 | YOR31 ATF1  | -3.6 | 0.8 |
| YHR12 ARP1  | -4.7 | 0.7 | YKL10 AAT1  | -3.5 | 0.8 | YBR22-      | -3.6 | 0.8 |
| YHR06 GAR1  | -4.7 | 0.7 | YDR06-      | -3.5 | 0.7 | YDR01 ARO1  | -3.6 | 0.8 |
| YDL23 PHO13 | -4.7 | 0.8 | YPL16 SVS1  | -3.5 | 0.6 | YKR06 MRS1  | -3.6 | 0.8 |
| YPL26 DIM1  | -4.7 | 0.7 | YDR11 TMA6  | -3.5 | 0.8 | YMR21 ERG1  | -3.6 | 0.8 |
| YDR01 IPT1  | -4.7 | 0.7 | YDR14 SAN1  | -3.5 | 0.7 | YOL08 REX4  | -3.6 | 0.7 |
| YDR51 GNP1  | -4.7 | 0.7 | YBR21 ENP1  | -3.5 | 0.7 | YMR11 ILV2  | -3.6 | 0.8 |
| YHR01 DOG1  | -4.7 | 0.7 | YLL04 ATG1  | -3.5 | 0.6 | YOR01 UTP2  | -3.6 | 0.7 |
| YPL03 TRM41 | -4.7 | 0.7 | YLR19 PBA1  | -3.5 | 0.8 | YPL01 GRX1  | -3.6 | 0.8 |
| YCR01 RRP41 | -4.7 | 0.7 | YHR06 CIC1  | -3.5 | 0.7 | YDL06 PEX1  | -3.6 | 0.8 |
| YBR21 DUT1  | -4.7 | 0.7 | YPL03 TRM4  | -3.5 | 0.7 | YOR21 RPN6  | -3.6 | 0.7 |
| YNL00 RLP7  | -4.7 | 0.7 | YML12 PHO6  | -3.5 | 0.7 | YMR21 CUS1  | -3.5 | 0.8 |
| YDR01 SNQ2  | -4.7 | 0.6 | YNR01 AGA1  | -3.5 | 0.4 | YLR08 SRL2  | -3.5 | 0.8 |
| YPL06-      | -4.7 | 0.7 | YJL03 TAD2  | -3.5 | 0.7 | YLR18 VTA1  | -3.5 | 0.8 |
| YBR01 CST26 | -4.7 | 0.8 | YPL18 COA2  | -3.5 | 0.6 | YOL14 DCP1  | -3.5 | 0.8 |
| YIL091-     | -4.7 | 0.6 | YBR16 RIB7  | -3.5 | 0.8 | YNR06 BRE5  | -3.5 | 0.6 |
| YDR06 RTR2  | -4.7 | 0.6 | YMR01 UTP1  | -3.5 | 0.7 | YER01 NOP1  | -3.5 | 0.6 |
| YJR12-      | -4.7 | 0.7 | YCR01 BUD2  | -3.5 | 0.7 | YML06 TEM1  | -3.5 | 0.8 |
| YER02 GCD11 | -4.7 | 0.7 | YKL20 ADD6  | -3.5 | 0.8 | YDR01 KRS1  | -3.5 | 0.8 |
| YMR31-      | -4.7 | 0.7 | YPL25 HFI1  | -3.5 | 0.8 | YPR16 TIF3  | -3.5 | 0.8 |
| YGR11(-)    | -4.7 | 0.2 | YJR06 CBF1  | -3.5 | 0.7 | YLR00 NOC1  | -3.5 | 0.8 |
| YGR11(-)    | -4.7 | 0.2 | YOR11 TRS3  | -3.5 | 0.7 | YML12 RSC6  | -3.5 | 0.8 |
| YIL082-     | -4.7 | 0.2 | YDR01 KCS1  | -3.4 | 0.8 | YML02 RPS1  | -3.5 | 0.8 |
| YIL082-     | -4.7 | 0.2 | YOR11 MED1  | -3.4 | 0.7 | YMR21 GFD1  | -3.5 | 0.7 |
| YBR22-      | -4.6 | 0.7 | YLL00 RTT1  | -3.4 | 0.7 | YIR011 RPR2 | -3.5 | 0.8 |
| YPR11 RRP9  | -4.6 | 0.7 | YBL03 POL1  | -3.4 | 0.8 | YGL18 COX4  | -3.5 | 0.7 |

|              |      |     |            |      |     |             |      |     |
|--------------|------|-----|------------|------|-----|-------------|------|-----|
| YNR0E ESF2   | -4.6 | 0.7 | YFL02 FRS2 | -3.4 | 0.8 | YPL00 HAT1  | -3.5 | 0.7 |
| YLR36 -      | -4.6 | 0.7 | YJR02 MDE  | -3.4 | 0.7 | YOR1E PUP1  | -3.5 | 0.8 |
| YCR01 -      | -4.6 | 0.6 | YBR2E TRS2 | -3.4 | 0.7 | YLR37 SUR2  | -3.5 | 0.9 |
| YLR14 SMD3   | -4.6 | 0.7 | YHR17 NMD  | -3.4 | 0.8 | YBL06 PRS2  | -3.5 | 0.8 |
| YGR0E -      | -4.6 | 0.8 | YNL07 NIS1 | -3.4 | 0.7 | YJL17: ATG2 | -3.5 | 0.9 |
| YOR0E BUD21  | -4.6 | 0.6 | YBR0E YPK3 | -3.4 | 0.7 | YDL13 SRF1  | -3.5 | 0.8 |
| YBL00 PDR3   | -4.6 | 0.7 | YGR1E BTN2 | -3.4 | 0.7 | YML0E YMD   | -3.5 | 0.8 |
| YIR0E MND2   | -4.6 | 0.8 | YOR1E INP5 | -3.4 | 0.8 | YER17 RAD   | -3.5 | 0.9 |
| YPR1E RPO2E  | -4.6 | 0.8 | YOL0E PRSE | -3.4 | 0.7 | YBL04 -     | -3.5 | 0.6 |
| YHR0E LRP1   | -4.6 | 0.6 | YNL21 RAP1 | -3.4 | 0.8 | YAR0C SWD   | -3.5 | 0.8 |
| YJR01 -      | -4.6 | 0.7 | YJR14 MGM  | -3.4 | 0.7 | YNL30 MCK   | -3.5 | 0.7 |
| YPR17 PRP4   | -4.6 | 0.7 | YGR1E PCP1 | -3.4 | 0.7 | YDL12 -     | -3.5 | 0.7 |
| YDR5E EMI1   | -4.6 | 0.8 | YBL00 HTA2 | -3.4 | 0.7 | YKL00 MRT2  | -3.5 | 0.7 |
| YIL07E AIR1  | -4.6 | 0.6 | YOL0E HMI1 | -3.4 | 0.7 | YGR2E NOP   | -3.5 | 0.7 |
| YAR0E IMD2   | -4.5 | 0.7 | YDR0E DAS2 | -3.4 | 0.8 | YJR04 NUP   | -3.5 | 0.8 |
| YHR2E IMD2   | -4.5 | 0.7 | YDR1E MTQ  | -3.4 | 0.8 | YER1E ISC1  | -3.5 | 0.7 |
| YLR43 IMD3   | -4.5 | 0.7 | YLR35 BUD  | -3.4 | 0.8 | YPL03 MET   | -3.5 | 0.7 |
| YJL09: SAP1E | -4.5 | 0.7 | YKLO2 MAK  | -3.4 | 0.7 | YBR1E TFC1  | -3.5 | 0.8 |
| YKR0E GCN3   | -4.5 | 0.8 | YOR2E -    | -3.4 | 0.7 | YLR15 ASP   | -3.4 | 0.8 |
| YOR3E MCH5   | -4.5 | 0.6 | YPR1E ANT1 | -3.4 | 0.7 | YLR15 ASP   | -3.4 | 0.8 |
| YOR2E STE4   | -4.5 | 0.8 | YNR0E COQ  | -3.4 | 0.7 | YLR15 ASP   | -3.4 | 0.8 |
| YMR1E ECM1E  | -4.5 | 0.7 | YGL07 HNM  | -3.3 | 0.8 | YLR16 ASP   | -3.4 | 0.8 |
| YHR2E PPX1   | -4.5 | 0.8 | YDR2E RRP2 | -3.3 | 0.7 | YMR0E SUB1  | -3.4 | 0.8 |
| YDR2E RRP4E  | -4.5 | 0.7 | YHR0E PIH1 | -3.3 | 0.8 | YOR1E RTC   | -3.4 | 0.8 |
| YNL20 RTT10  | -4.5 | 0.8 | YDR1E REF2 | -3.3 | 0.8 | YDR1E REF2  | -3.4 | 0.8 |
| YDL01 CDC7   | -4.5 | 0.8 | YMR0E MCM  | -3.3 | 0.7 | YJR01 ILV3  | -3.4 | 0.8 |
| YBR0E AAC3   | -4.5 | 0.7 | YER1E -    | -3.3 | 0.7 | YBL03 POL1  | -3.4 | 0.8 |
| YGL2E ADE5   | -4.5 | 0.8 | YER0E VTC1 | -3.3 | 0.8 | YMR0E CDC   | -3.4 | 0.8 |
| YJR06 RPA1E  | -4.5 | 0.7 | YBR2E ERT1 | -3.3 | 0.7 | YOR1E THI8  | -3.4 | 0.7 |
| YKL09 UTP11  | -4.5 | 0.6 | YLR44 FPR4 | -3.3 | 0.8 | YDR2E RRP2  | -3.4 | 0.7 |
| YGL0E -      | -4.5 | 0.7 | YLR07 RFU1 | -3.3 | 0.7 | YMR0E PEX1  | -3.4 | 0.9 |
| YFL04 OTU1   | -4.5 | 0.7 | YBR1E UBS1 | -3.3 | 0.8 | YDL20 CWC   | -3.4 | 0.7 |
| YOR2E SEC6E  | -4.5 | 0.7 | YER1E -    | -3.3 | 0.7 | YOR0E NOB   | -3.4 | 0.8 |
| YDR2E ZIP1   | -4.5 | 0.5 | YNL24 VPS7 | -3.3 | 0.7 | YNL25 NRD   | -3.4 | 0.8 |
| YKR0E MRS4   | -4.5 | 0.7 | YDL06 TSR1 | -3.3 | 0.7 | YER1E NSA2  | -3.4 | 0.8 |
| YEL04 IES6   | -4.5 | 0.7 | YLR29 GCD  | -3.3 | 0.8 | YOL0E TRM   | -3.4 | 0.8 |
| YOL0E HMI1   | -4.5 | 0.7 | YKL18 PRS1 | -3.3 | 0.8 | YOR0E AUS1  | -3.4 | 0.7 |
| YGR0E ASK1C  | -4.4 | 0.8 | YML1E SEC  | -3.3 | 0.8 | YOL01 HTZ1  | -3.4 | 0.8 |
| YBL04 -      | -4.4 | 0.6 | YDL12 -    | -3.3 | 0.7 | YNL09 RPS7  | -3.4 | 0.8 |
| YDR4E CWC2   | -4.4 | 0.7 | YJR05 HIT1 | -3.2 | 0.6 | YOL0E IZH2  | -3.4 | 0.8 |
| YDR0E RLI1   | -4.4 | 0.7 | YOL0E REX4 | -3.2 | 0.7 | YDR0E IPT1  | -3.4 | 0.7 |
| YNR0E BIO3   | -4.4 | 0.7 | YOL1E NDJ1 | -3.2 | 0.4 | YMR1E MMT   | -3.4 | 0.8 |
| YLR22 UTP1E  | -4.4 | 0.7 | YDR4E PFA5 | -3.2 | 0.8 | YNL03 GPI1  | -3.4 | 0.7 |
| YOR2E RET1   | -4.4 | 0.8 | YOR2E TIM1 | -3.2 | 0.8 | YGR1E PRE   | -3.4 | 0.9 |
| YOR2E RPB8   | -4.4 | 0.8 | YDR0E RLI1 | -3.2 | 0.8 | YLL06 MMP   | -3.4 | 0.6 |
| YML07 BET5   | -4.4 | 0.7 | YOR2E RRS1 | -3.2 | 0.7 | YNL04 -     | -3.4 | 0.7 |
| YLR19 PEX1E  | -4.4 | 0.8 | YKL07 MUD  | -3.2 | 0.8 | YGR1E NUP   | -3.4 | 0.8 |
| YHR0E RPF1   | -4.4 | 0.6 | YNL31 EMW  | -3.2 | 0.8 | YGL18 GTS1  | -3.3 | 0.8 |
| YLR29 GCD7   | -4.4 | 0.8 | YGL1E SOH  | -3.2 | 0.7 | YCR0E -     | -3.3 | 0.8 |
| YKL00 MET1E  | -4.4 | 0.5 | YJL1E GLG2 | -3.2 | 0.7 | YDR5E YRF1  | -3.3 | 0.1 |
| YPL23 RVB2   | -4.4 | 0.8 | YHR0E LEU5 | -3.2 | 0.7 | YEL07 YRF1  | -3.3 | 0.1 |
| YOL0E GPD2   | -4.4 | 0.7 | YER17 RAD  | -3.2 | 0.8 | YER1E YRF1  | -3.3 | 0.1 |
| YKR0E OSH6   | -4.4 | 0.7 | YGL07 RPB  | -3.2 | 0.8 | YGR2E YRF1  | -3.3 | 0.1 |
| YNL11 RPC1E  | -4.4 | 0.8 | YPL21 PCL8 | -3.2 | 0.8 | YIL17 YRF1  | -3.3 | 0.1 |
| YOR0E AUS1   | -4.4 | 0.7 | YMR0E MIH1 | -3.2 | 0.8 | YJL2E YRF1  | -3.3 | 0.1 |
| YGR1E TIF4E  | -4.4 | 0.7 | YGL1E COX2 | -3.2 | 0.7 | YLR46 YRF1  | -3.3 | 0.1 |
| YEL05 POL5   | -4.4 | 0.7 | YNR0E -    | -3.2 | 0.8 | YLR46 YRF1  | -3.3 | 0.1 |
| YOR2E -      | -4.4 | 0.7 | YMR0E ERB1 | -3.2 | 0.8 | YLR46 YRF1  | -3.3 | 0.1 |
| YNL02 FAP1   | -4.4 | 0.7 | YDL04 PRP1 | -3.2 | 0.8 | YNL33 YRF1  | -3.3 | 0.1 |
| YDR3E SVF1   | -4.4 | 0.7 | YOR2E -    | -3.2 | 0.5 | YPL28 YRF1  | -3.3 | 0.1 |
| YGL1E ARI1   | -4.4 | 0.7 | YDR2E -    | -3.2 | 0.8 | YLR19 SIK1  | -3.3 | 0.7 |
| YMR3E SAM4   | -4.4 | 0.7 | YJL0E DLS1 | -3.2 | 0.8 | YDL17 DLD2  | -3.3 | 0.8 |
| YPL27 SAM4   | -4.4 | 0.7 | YOL14 RRP2 | -3.2 | 0.8 | YER1E RPS2  | -3.3 | 0.9 |
| YGR0E -      | -4.3 | 0.7 | YDR1E PEX7 | -3.2 | 0.8 | YBR1E TYR1  | -3.3 | 0.8 |
| YIL11E HPM1  | -4.3 | 0.7 | YBR0E POL3 | -3.2 | 0.8 | YDR11 APC2  | -3.3 | 0.7 |
| YNL16 -      | -4.3 | 0.7 | YHR1E GEP2 | -3.2 | 0.8 | YCR0E RRP2  | -3.3 | 0.7 |
| YIL00E BET1  | -4.3 | 0.7 | YMR0E KAR  | -3.2 | 0.7 | YER0E YPT3  | -3.3 | 0.9 |
| YGL2E MNT2   | -4.3 | 0.7 | YDR1E UPS  | -3.2 | 0.6 | YJL08 ARP2  | -3.3 | 0.8 |
| YNL25 NRD1   | -4.3 | 0.8 | YBR2E -    | -3.2 | 0.8 | YEL05 POL   | -3.3 | 0.8 |
| YOR3E TEA1   | -4.3 | 0.7 | YDR1E RPA1 | -3.1 | 0.8 | YOR2E NPT1  | -3.3 | 0.8 |
| YLR43 IMD3   | -4.3 | 0.7 | YBR21 -    | -3.1 | 0.8 | YDL16 CDC   | -3.3 | 0.8 |

|             |      |     |             |      |     |             |      |     |
|-------------|------|-----|-------------|------|-----|-------------|------|-----|
| YPL26 KEL3  | -4.3 | 0.7 | YBR22-      | -3.1 | 0.8 | YHR12 NSG   | -3.3 | 0.8 |
| YOR33 VTS1  | -4.3 | 0.6 | YDR45 SEC2  | -3.1 | 0.8 | YBR13 SHE3  | -3.3 | 0.8 |
| YOR01 YSP3  | -4.3 | 0.6 | YGR14 NAT2  | -3.1 | 0.8 | YDR46 RPB7  | -3.3 | 0.9 |
| YOR11 LEU9  | -4.3 | 0.8 | YGL05 TYW   | -3.1 | 0.8 | YBR06 RER2  | -3.3 | 0.8 |
| YNR06 DSE4  | -4.3 | 0.7 | YDR46 TFB3  | -3.1 | 0.8 | YDL18 RBS1  | -3.3 | 0.8 |
| YDL15 RPC5  | -4.3 | 0.6 | YBR17 SMY2  | -3.1 | 0.8 | YGR05 TPC1  | -3.3 | 0.8 |
| YOR15 LIP5  | -4.3 | 0.7 | YDR24-      | -3.1 | 0.6 | YPL18 MRN   | -3.3 | 0.8 |
| YJR12-      | -4.3 | 0.7 | YMR01 NPL6  | -3.1 | 0.7 | YOR02-      | -3.3 | 0.8 |
| YJL08 ARP4  | -4.3 | 0.8 | YBR06 BAP2  | -3.1 | 0.7 | YOR22 MET1  | -3.3 | 0.8 |
| YLR27 DBP9  | -4.3 | 0.6 | YDL16 SFA1  | -3.1 | 0.8 | YOR15 LIP5  | -3.3 | 0.8 |
| YPL06 ALD6  | -4.3 | 0.7 | YBR14-      | -3.1 | 0.7 | YKL14 LTV1  | -3.3 | 0.7 |
| YMR01 SEC14 | -4.3 | 0.8 | YHR15 IKI1  | -3.1 | 0.8 | YGL25 ADH4  | -3.3 | 0.8 |
| YOR11 RTC5  | -4.3 | 0.8 | YCR01-      | -3.1 | 0.6 | YDL24-      | -3.3 | 0.8 |
| YJL03 HCA4  | -4.3 | 0.6 | YGR01 TEL2  | -3.1 | 0.8 | YIL115 RHO  | -3.3 | 0.8 |
| YKR03 GAP1  | -4.3 | 0.5 | YDR01 SHU2  | -3.1 | 0.7 | YIL111 HPM  | -3.3 | 0.7 |
| YPL10-      | -4.3 | 0.8 | YGL05 LCL3  | -3.1 | 0.7 | YBR23 PBP2  | -3.3 | 0.7 |
| YGL24 RTF1  | -4.3 | 0.7 | YGL01 ATE1  | -3.1 | 0.8 | YGL15-      | -3.2 | 0.8 |
| YOL13 CDC3  | -4.3 | 0.8 | YDL20 HEM   | -3.1 | 0.8 | YNL30 RPL1  | -3.2 | 0.8 |
| YER01 PAC2  | -4.3 | 0.7 | YGR01 TIM2  | -3.1 | 0.8 | YEL04 GLY1  | -3.2 | 0.8 |
| YHR04-      | -4.3 | 0.8 | YNL20 RIO2  | -3.1 | 0.8 | YFL04 SEC5  | -3.2 | 0.9 |
| YGR21 NOP1  | -4.2 | 0.7 | YAR07-      | -3.1 | 0.5 | YKL18 PRS1  | -3.2 | 0.8 |
| YHR06 RRP3  | -4.2 | 0.8 | YHR21-      | -3.1 | 0.5 | YBL03 HEK2  | -3.2 | 0.7 |
| YGR01 LST7  | -4.2 | 0.6 | YJL06 UTP1  | -3.1 | 0.7 | YDR15 UPS3  | -3.2 | 0.7 |
| YDR12 DPB4  | -4.2 | 0.8 | YGL15 CDC5  | -3.1 | 0.8 | YBR05 POL3  | -3.2 | 0.8 |
| YPL02 ERG1  | -4.2 | 0.8 | YOR14 THI8  | -3.1 | 0.7 | YOR34 RPA4  | -3.2 | 0.8 |
| YLR08 EMP7  | -4.2 | 0.8 | YMR21 FSH2  | -3.1 | 0.7 | YBL02 NCL1  | -3.2 | 0.9 |
| YPL14 KES1  | -4.2 | 0.7 | YHR14 IMP3  | -3.1 | 0.7 | YMR01 RNA   | -3.2 | 0.8 |
| YDL20 NHP2  | -4.2 | 0.7 | YDR04 BAP3  | -3.1 | 0.8 | YNL02-      | -3.2 | 0.7 |
| YPR06 SPE3  | -4.2 | 0.8 | YIL027 KRE2 | -3.1 | 0.8 | YOR11 RPT5  | -3.2 | 0.8 |
| YLR38 IKI3  | -4.2 | 0.8 | YPL09 GLR1  | -3.1 | 0.8 | YHR02 PPA1  | -3.2 | 0.9 |
| YDR45 IZH1  | -4.2 | 0.7 | YMR11 HLJ1  | -3.1 | 0.8 | YLR06 ENV1  | -3.2 | 0.7 |
| YGL05 MST27 | -4.2 | 0.4 | YOL01 IZH2  | -3.1 | 0.8 | YJL011 NOP5 | -3.2 | 0.7 |
| YDR21 UME6  | -4.2 | 0.8 | YDR11 ARX1  | -3.0 | 0.7 | YHL02 OPI1  | -3.2 | 0.8 |
| YGR14 VPS62 | -4.2 | 0.8 | YGL01 CKB1  | -3.0 | 0.8 | YJL001 CCT5 | -3.2 | 0.9 |
| YML04 PRM6  | -4.2 | 0.5 | YDR14-      | -3.0 | 0.8 | YJL031 SNX4 | -3.2 | 0.8 |
| YFR01 LOC1  | -4.2 | 0.5 | YMR21 DML1  | -3.0 | 0.8 |             |      |     |
| YBL04 FUI1  | -4.2 | 0.7 | YJL19-      | -3.0 | 0.8 |             |      |     |
| YJL19 ELO1  | -4.2 | 0.7 | YLR01 MEU   | -3.0 | 0.8 |             |      |     |
| YPL05 LCL1  | -4.2 | 0.6 | YJL12 NIT2  | -3.0 | 0.7 |             |      |     |
| YBR22 MCX1  | -4.2 | 0.8 | YJL001 CTK2 | -3.0 | 0.8 |             |      |     |
| YPL21 PUS1  | -4.2 | 0.7 | YNL18 IPI3  | -3.0 | 0.7 |             |      |     |
| YJR10 ADO1  | -4.2 | 0.8 | YDR35 HPT1  | -3.0 | 0.7 |             |      |     |
| YDR32 ASP1  | -4.2 | 0.7 | YGR21 ZPR1  | -3.0 | 0.7 |             |      |     |
| YBR15 ARL1  | -4.1 | 0.7 | YBR17 SWD   | -3.0 | 0.8 |             |      |     |
| YGR1(-      | -4.1 | 0.6 | YOR21 PAC1  | -3.0 | 0.8 |             |      |     |
| YIL082-     | -4.1 | 0.6 | YKL02 URA6  | -3.0 | 0.7 |             |      |     |
| YOR01 ATX2  | -4.1 | 0.8 | YMR21 RIT1  | -3.0 | 0.8 |             |      |     |
| YLR17 DPH5  | -4.1 | 0.8 | YNL31 PHA2  | -3.0 | 0.8 |             |      |     |
| YOL14 RRP4  | -4.1 | 0.8 | YHR21 RPN1  | -3.0 | 0.8 |             |      |     |
| YIL142 CCT2 | -4.1 | 0.8 | YDR11 APC4  | -3.0 | 0.7 |             |      |     |
| YNL08 TCB2  | -4.1 | 0.8 | YBR25 CTP1  | -3.0 | 0.7 |             |      |     |
| YKL18 SPE1  | -4.1 | 0.6 | YFL03 RPL2  | -3.0 | 0.8 |             |      |     |
| YKL00 MRT4  | -4.1 | 0.7 | YBR05 MUM   | -3.0 | 0.7 |             |      |     |
| YDL18 RBS1  | -4.1 | 0.8 | YPR11 MRI1  | -3.0 | 0.8 |             |      |     |
| YHR07 ERG7  | -4.1 | 0.7 | YJL171 ASG7 | -3.0 | 0.4 |             |      |     |
| YPL19 NAB3  | -4.1 | 0.7 | YGR04 KSS1  | -3.0 | 0.8 |             |      |     |
| YPL13 RDS2  | -4.1 | 0.8 | YHL02 OPI1  | -3.0 | 0.8 |             |      |     |
| YKL01 URB1  | -4.1 | 0.7 | YFL00 VTC2  | -3.0 | 0.8 |             |      |     |
| YGR01 TFG2  | -4.1 | 0.8 | YCR04-      | -3.0 | 0.8 |             |      |     |
| YOL14 PPM2  | -4.1 | 0.5 | YPR15 ARR1  | -3.0 | 0.8 |             |      |     |
| YGL05 SRM1  | -4.1 | 0.8 | YLR40 UTP2  | -3.0 | 0.8 |             |      |     |
| YLR17 CBF5  | -4.1 | 0.8 | YJL01 CCT3  | -3.0 | 0.8 |             |      |     |
| YLR06 ENV1  | -4.1 | 0.8 | YNL28 POP3  | -3.0 | 0.8 |             |      |     |
| YHR03 ERC1  | -4.1 | 0.7 | YBL09 MRP1  | -3.0 | 0.7 |             |      |     |
| YDR14 MTQ2  | -4.1 | 0.8 | YPR12 AXL1  | -3.0 | 0.8 |             |      |     |
| YDR35 NCB2  | -4.1 | 0.7 | YCL00-      | -3.0 | 0.8 |             |      |     |
| YMR11-      | -4.1 | 0.9 | YJL201 NUC  | -2.9 | 0.8 |             |      |     |
| YOR24 ENV9  | -4.1 | 0.8 | YPL08 ELP3  | -2.9 | 0.8 |             |      |     |
| YGR01 ACB1  | -4.1 | 0.8 | YDR35-      | -2.9 | 0.8 |             |      |     |
| YDR47 SNM1  | -4.1 | 0.8 | YHR03 BRL1  | -2.9 | 0.7 |             |      |     |
| YJR03 CPR7  | -4.1 | 0.8 | YDR35 UTP5  | -2.9 | 0.7 |             |      |     |

|             |      |     |            |      |     |
|-------------|------|-----|------------|------|-----|
| YGL22 FRA2  | -4.1 | 0.7 | YOR37 ATF1 | -2.9 | 0.8 |
| YGR05 RRP4E | -4.1 | 0.8 | YLR35 ORM  | -2.9 | 0.7 |
| YOR16 SWT1  | -4.1 | 0.8 | YDL02 GPD  | -2.9 | 0.7 |
| YOL12 YGK3  | -4.1 | 0.7 | YLR11 MSL5 | -2.9 | 0.8 |
| YOR16 VAM3  | -4.0 | 0.8 | YGL05 NBP3 | -2.9 | 0.8 |
| YGL10 SEH1  | -4.0 | 0.8 | YBL06 AST1 | -2.9 | 0.8 |
| YPL11 CAR1  | -4.0 | 0.8 | YKR07 DRE2 | -2.9 | 0.7 |
| YGL12 MON1  | -4.0 | 0.5 | YGR20 ELP2 | -2.9 | 0.7 |
| YDR42 TIF35 | -4.0 | 0.7 | YLR34 -    | -2.9 | 0.8 |
| YOR27 MET7  | -4.0 | 0.8 | YPR12 NOC  | -2.9 | 0.7 |
| YML02 NSE5  | -4.0 | 0.7 | YGR11 NSR1 | -2.9 | 0.7 |
| YER17 DMC1  | -4.0 | 0.6 | YMR01 SEN1 | -2.9 | 0.7 |
| YDR28 -     | -4.0 | 0.8 | YCR05 RRP2 | -2.9 | 0.8 |
| YDR02 NSI1  | -4.0 | 0.7 | YDL06 UBC5 | -2.9 | 0.8 |
| YOL14 PEX11 | -4.0 | 0.7 | YGL16 SUT1 | -2.9 | 0.8 |
| YLL00 DRS1  | -4.0 | 0.6 | YER05 NUG  | -2.9 | 0.8 |
| YDR41 SYF1  | -4.0 | 0.8 | YHL00 LAG1 | -2.9 | 0.8 |
| YBL02 -     | -4.0 | 0.7 | YGL15 CDC2 | -2.9 | 0.8 |
| YOL05 GPM3  | -4.0 | 0.7 | YDL15 CLB3 | -2.9 | 0.8 |
| YOR05 CKB2  | -4.0 | 0.8 | YLR07 BOS1 | -2.9 | 0.8 |
| YBR21 -     | -4.0 | 0.8 | YNL16 PSD1 | -2.9 | 0.8 |
| YBR22 -     | -4.0 | 0.8 | YKR02 GCN  | -2.9 | 0.8 |
| YHL01 OTU2  | -4.0 | 0.7 | YOR36 PRT1 | -2.9 | 0.8 |
| YGR12 -     | -4.0 | 0.5 | YGL08 MF(A | -2.9 | 0.4 |
| YJL00 CCT8  | -4.0 | 0.7 | YKR08 PRP1 | -2.9 | 0.8 |
| YKL00 AUR1  | -4.0 | 0.8 | YKL11 PRR1 | -2.9 | 0.8 |
| YIL14 PAN6  | -4.0 | 0.8 | YOR27 FSF1 | -2.9 | 0.8 |
| YDR11 FOB1  | -4.0 | 0.8 | YGR27 -    | -2.8 | 0.8 |
| YPR06 ARO7  | -4.0 | 0.7 | YKL00 MRT2 | -2.8 | 0.7 |
| YLR19 SIK1  | -3.9 | 0.7 | YNL19 DUG  | -2.8 | 0.8 |
| YDR38 TRR1  | -3.9 | 0.9 | YLL06 -    | -2.8 | 0.5 |
| YBR28 CTP1  | -3.9 | 0.7 | YML10 CAC2 | -2.8 | 0.8 |
| YHR12 RPC1C | -3.9 | 0.8 | YGL17 -    | -2.8 | 0.8 |
| YKL17 EBP2  | -3.9 | 0.6 | YHR16 MTG  | -2.8 | 0.8 |
| YNR01 PRP2  | -3.9 | 0.7 | YLR40 FLD1 | -2.8 | 0.8 |
| YFL00 DEG1  | -3.9 | 0.7 | YDR30 GPI1 | -2.8 | 0.8 |
| YGL02 CGR1  | -3.9 | 0.5 | YIL07 SER3 | -2.8 | 0.8 |
| YKR02 DBP7  | -3.9 | 0.6 | YNL30 TOS6 | -2.8 | 0.8 |
| YKR06 MET1  | -3.9 | 0.7 | YOR21 CAF2 | -2.8 | 0.8 |
| YGL16 SUT1  | -3.9 | 0.8 | YGR10 SRB5 | -2.8 | 0.8 |
| YKR05 SRP4C | -3.9 | 0.6 | YOL00 CSI2 | -2.8 | 0.7 |
| YLR06 -     | -3.9 | 0.8 | YBR18 AMN  | -2.8 | 0.7 |
| YGL04 DST1  | -3.9 | 0.8 | YHR05 ERC1 | -2.8 | 0.8 |
| YLR12 -     | -3.9 | 0.7 | YGR05 UTP2 | -2.8 | 0.8 |
| YPR06 FCY1  | -3.9 | 0.8 | YDL10 KIN2 | -2.8 | 0.8 |
| YJR06 CCT5  | -3.9 | 0.8 | YOL07 BRX1 | -2.8 | 0.8 |
| YDR45 PUF6  | -3.9 | 0.6 | YDL09 RAM  | -2.8 | 0.8 |
| YIL07 HOP1  | -3.9 | 0.5 | YJL13 MRS  | -2.8 | 0.8 |
| YBL01 RRN6  | -3.9 | 0.8 | YPR05 ERV2 | -2.8 | 0.8 |
| YLR22 RSA3  | -3.9 | 0.7 | YLR41 CDC1 | -2.8 | 0.8 |
| YJL20 PRP21 | -3.9 | 0.7 | YMR21 HSH1 | -2.8 | 0.8 |
| YOL11 MSB4  | -3.9 | 0.8 | YPL17 CBC2 | -2.8 | 0.8 |
| YDR22 GTB1  | -3.9 | 0.7 | YFL03 MOB  | -2.8 | 0.8 |
| YDR21 -     | -3.9 | 0.9 | YER05 YND1 | -2.8 | 0.8 |
| YER05 TRP2  | -3.9 | 0.7 | YKL05 ASK1 | -2.8 | 0.8 |
| YLL06 MHT1  | -3.9 | 0.7 | YOR29 TUM  | -2.8 | 0.8 |
| YDR30 PRO1  | -3.9 | 0.8 | YPL06 BTS1 | -2.8 | 0.8 |
| YPL04 SGF11 | -3.9 | 0.8 | YPR13 SPN1 | -2.8 | 0.8 |
| YDL14 CCT4  | -3.9 | 0.9 | YLR15 -    | -2.8 | 0.4 |
| YNL29 CLA4  | -3.9 | 0.8 | YDR15 CAB5 | -2.8 | 0.7 |
| YBL11 YRF1- | -3.9 | 0.5 | YDR48 SLD5 | -2.8 | 0.8 |
| YDR52 YRF1- | -3.9 | 0.5 | YCL06 BUD5 | -2.8 | 0.7 |
| YER15 YRF1- | -3.9 | 0.5 | YCR05 BUD5 | -2.8 | 0.7 |
| YFL06 YRF1- | -3.9 | 0.5 | YMR21 -    | -2.8 | 0.8 |
| YGR25 YRF1- | -3.9 | 0.5 | YPR15 RRP5 | -2.7 | 0.7 |
| YHL04 YRF1- | -3.9 | 0.5 | YPR12 YLH4 | -2.7 | 0.8 |
| YHR21 -     | -3.9 | 0.5 | YHR15 NSG  | -2.7 | 0.8 |
| YIL17 YRF1- | -3.9 | 0.5 | YIL06 SEE1 | -2.7 | 0.8 |
| YJL22 YRF1- | -3.9 | 0.5 | YIL02 HIS6 | -2.7 | 0.7 |
| YLR46 -     | -3.9 | 0.5 | YPL15 PRP2 | -2.7 | 0.8 |
| YLR46 YRF1- | -3.9 | 0.5 | YMR11 RRB1 | -2.7 | 0.8 |

|              |      |     |             |      |     |
|--------------|------|-----|-------------|------|-----|
| YML13-       | -3.9 | 0.5 | YGR0: POP6  | -2.7 | 0.7 |
| YNL33 YRF1-  | -3.9 | 0.5 | YOL0: SIL1  | -2.7 | 0.8 |
| YPL28 YRF1-  | -3.9 | 0.5 | YHL02 WSC   | -2.7 | 0.5 |
| YPR2(-       | -3.9 | 0.5 | YBR2: YPT1  | -2.7 | 0.8 |
| YLR36 NMD4   | -3.9 | 0.8 | YPL08 MOT   | -2.7 | 0.8 |
| YIL127 RRT14 | -3.9 | 0.6 | YHR1: CTF8  | -2.7 | 0.8 |
| YMR1: CIN4   | -3.9 | 0.7 | YDR1: ENT5  | -2.7 | 0.8 |
| YMR1: SSO2   | -3.8 | 0.7 | YPL13 UME   | -2.7 | 0.8 |
| YGL1E -      | -3.8 | 0.8 | YHR0: RRP3  | -2.7 | 0.8 |
| YMR0: NPL6   | -3.8 | 0.8 | YPL12 HHO   | -2.7 | 0.8 |
| YOL0: IZH2   | -3.8 | 0.8 | YMR1: GAT2  | -2.7 | 0.7 |
| YPR1: JIP5   | -3.8 | 0.8 | YOR1: MTR   | -2.7 | 0.8 |
| YPL27 SAM3   | -3.8 | 0.7 | YDL23 PHO   | -2.7 | 0.8 |
| YGR2: SER2   | -3.8 | 0.8 | YMR2: ROY   | -2.7 | 0.8 |
| YPR1: MMS1   | -3.8 | 0.6 | YGR0: PEX3  | -2.7 | 0.8 |
| YKL03 TTI1   | -3.8 | 0.8 | YGL0: GEP7  | -2.7 | 0.7 |
| YHR0: SSF1   | -3.8 | 0.6 | YNR0: PPG1  | -2.7 | 0.8 |
| YER1: GLE2   | -3.8 | 0.8 | YPR11 RPC4  | -2.7 | 0.8 |
| YMR2: -      | -3.8 | 0.6 | YOR1: OST2  | -2.7 | 0.8 |
| YOR3: PRT1   | -3.8 | 0.8 | YJL08: ARG3 | -2.7 | 0.8 |
| YML12 ERG1:  | -3.8 | 0.8 | YLR33 SGD   | -2.7 | 0.7 |
| YGR0: GCD2   | -3.8 | 0.8 | YLR32 -     | -2.7 | 0.8 |
| YPR0: HTS1   | -3.8 | 0.8 | YKR0: RPF2  | -2.7 | 0.8 |
| YDL16 CDC3:  | -3.8 | 0.8 | YMR1: INP2  | -2.7 | 0.8 |
| YJR10 ECM2:  | -3.8 | 0.8 | YDR4: RMT2  | -2.7 | 0.8 |
| YNL09 -      | -3.8 | 0.6 | YBL04 PSY4  | -2.7 | 0.8 |
| YHR1: IKI1   | -3.8 | 0.8 | YJR04 TAH1  | -2.7 | 0.8 |
| YNR0: DBP6   | -3.8 | 0.8 | YGL0: ERP6  | -2.7 | 0.8 |
| YNR0: -      | -3.8 | 0.6 | YLR40 DUS4  | -2.7 | 0.7 |
| YMR2: TMA2:  | -3.8 | 0.6 | YIL091 UTP2 | -2.7 | 0.8 |
| YCL03 STE50  | -3.8 | 0.8 | YAR0: NUP6  | -2.7 | 0.8 |
| YPR0: SMK1   | -3.8 | 0.7 | YKL01 RAM:  | -2.7 | 0.8 |
| YGL2: MCM6   | -3.8 | 0.8 | YER0: PAC2  | -2.7 | 0.7 |
| YOR0: TSR3   | -3.8 | 0.7 | YDR17 ARG6  | -2.7 | 0.8 |
| YLR41 BER1   | -3.8 | 0.8 | YJL20 LAA1  | -2.7 | 0.8 |
| YBL00 -      | -3.8 | 0.7 | YKR0: MRPI  | -2.7 | 0.8 |
| YBL00 -      | -3.8 | 0.7 | YPL22 ALG5  | -2.7 | 0.8 |
| YDR17 -      | -3.8 | 0.7 | YKL18 HYM   | -2.7 | 0.8 |
| YMR0: -      | -3.8 | 0.7 | YPL19 PRM:  | -2.7 | 0.6 |
| YMR0: -      | -3.8 | 0.7 | YGL24 BRR6  | -2.7 | 0.8 |
| YNL28 -      | -3.8 | 0.7 | YML0: VPS7  | -2.6 | 0.8 |
| YNL28 -      | -3.8 | 0.7 | YDR2: MNN   | -2.6 | 0.8 |
| YJR04 POL32  | -3.8 | 0.8 | YPL23 RVB2  | -2.6 | 0.8 |
| YML01 -      | -3.8 | 0.8 | YNL31 PFS2  | -2.6 | 0.8 |
| YGR0: -      | -3.8 | 0.8 | YOL0: APM4  | -2.6 | 0.8 |
| YOL0: -      | -3.8 | 0.8 | YBR2: ARO4  | -2.6 | 0.8 |
| YLL03 GRC3   | -3.8 | 0.7 | YHR0: PUT2  | -2.6 | 0.8 |
| YDR3: UTP4   | -3.8 | 0.7 | YBL00 LDB7  | -2.6 | 0.8 |
| YGR0: ADE6   | -3.8 | 0.8 | YML0: RAD6  | -2.6 | 0.8 |
| YEL03 ECM1:  | -3.8 | 0.7 | YJL21: PEX2 | -2.6 | 0.8 |
| YGR0: CAX4   | -3.7 | 0.7 | YMR2: SAP3  | -2.6 | 0.8 |
| YMR1: NDE1   | -3.7 | 0.6 | YDL08 LUC7  | -2.6 | 0.8 |
| YGR0: SMD1   | -3.7 | 0.8 | YDL00 RMD   | -2.6 | 0.8 |
| YOR1: SLP1   | -3.7 | 0.8 | YDR0: RRG   | -2.6 | 0.8 |
| YNL10 -      | -3.7 | 0.8 | YNL08 EOS   | -2.6 | 0.8 |
| YNL16 RIA1   | -3.7 | 0.8 | YOR0: -     | -2.6 | 0.8 |
| YKR07 TRZ1   | -3.7 | 0.8 | YOR0: HIR2  | -2.6 | 0.8 |
| YGR1: ATF2   | -3.7 | 0.7 | YDR4: UTP6  | -2.6 | 0.7 |
| YER17 RAD2:  | -3.7 | 0.8 | YFR04 RMD:  | -2.6 | 0.7 |
| YMR2: RIT1   | -3.7 | 0.8 | YBL08 ALG3  | -2.6 | 0.8 |
| YIL17: FSP2  | -3.7 | 0.8 | YBL08 ALG3  | -2.6 | 0.8 |
| YJL22 FSP2   | -3.7 | 0.8 | YJL05: -    | -2.6 | 0.4 |
| YOL1: FSP2   | -3.7 | 0.8 | YOR3: TYE7  | -2.6 | 0.7 |
| YML11 DAT1   | -3.7 | 0.7 | YMR1: MUB   | -2.6 | 0.8 |
| YAL05 ECM1   | -3.7 | 0.6 | YPL13 RDS2  | -2.6 | 0.8 |
| YDR3: CDC4:  | -3.7 | 0.7 | YPL12 SPC2  | -2.6 | 0.8 |
| YCR0: FEN1   | -3.7 | 0.8 | YLL03 PRP1  | -2.6 | 0.8 |
| YMR2: HSH1:  | -3.7 | 0.8 | YHR2: PPX1  | -2.6 | 0.8 |
| YBR2: RRT2   | -3.7 | 0.9 | YKR0: BET3  | -2.6 | 0.8 |
| YPR0: SRP54  | -3.7 | 0.8 | YDL15 RPC6  | -2.6 | 0.7 |
| YOR2: NOC2   | -3.7 | 0.7 | YGL17 NUP4  | -2.6 | 0.8 |

|              |      |     |             |      |     |
|--------------|------|-----|-------------|------|-----|
| YPL21 -      | -3.7 | 0.7 | YHR0: RRM:  | -2.6 | 0.8 |
| YPL14 PXA1   | -3.7 | 0.6 | YPR0: BRR1  | -2.6 | 0.8 |
| YJL05 ZAP1   | -3.7 | 0.7 | YGL2: VEL1  | -2.6 | 0.7 |
| YGL07 DBP3   | -3.7 | 0.7 | YJR13 TTI2  | -2.6 | 0.8 |
| YLL05 -      | -3.7 | 0.7 | YMR2: -     | -2.6 | 0.7 |
| YNR0: TRM1   | -3.7 | 0.8 | YDR17 HMO   | -2.6 | 0.8 |
| YBL11 YRF1-  | -3.7 | 0.3 | YGR0: RRP:  | -2.6 | 0.8 |
| YBL11 YRF1-  | -3.7 | 0.3 | YPL21 NIP7  | -2.6 | 0.8 |
| YDR5: YRF1-  | -3.7 | 0.3 | YBL03 URA7  | -2.6 | 0.8 |
| YEL07 YRF1-  | -3.7 | 0.3 | YMR2: MTF1  | -2.6 | 0.8 |
| YER1: YRF1-  | -3.7 | 0.3 | YML0: VPS:  | -2.5 | 0.8 |
| YGR2: YRF1-  | -3.7 | 0.3 | YBL02 -     | -2.5 | 0.8 |
| YHR2: YRF1-  | -3.7 | 0.3 | YPL09 NOG   | -2.5 | 0.8 |
| YHR2: YRF1-  | -3.7 | 0.3 | YGL0: PGD:  | -2.5 | 0.8 |
| YIL17: YRF1- | -3.7 | 0.3 | YAR07 IMD1  | -2.5 | 0.7 |
| YJL22: YRF1- | -3.7 | 0.3 | YHR2: IMD2  | -2.5 | 0.7 |
| YLL06 YRF1-  | -3.7 | 0.3 | YOR0: CIN5  | -2.5 | 0.8 |
| YLL06 YRF1-  | -3.7 | 0.3 | YMR0: ARP:  | -2.5 | 0.8 |
| YLR46 YRF1-  | -3.7 | 0.3 | YBL02 RRN:  | -2.5 | 0.8 |
| YLR46 YRF1-  | -3.7 | 0.3 | YGL1: SUA:  | -2.5 | 0.8 |
| YML1: -      | -3.7 | 0.3 | YBL05 TOD:  | -2.5 | 0.7 |
| YNL33 YRF1-  | -3.7 | 0.3 | YML0: RRN:  | -2.5 | 0.7 |
| YOR3: YRF1-  | -3.7 | 0.3 | YOR2: ODC:  | -2.5 | 0.7 |
| YPL28 YRF1-  | -3.7 | 0.3 | YNL07 RNH:  | -2.5 | 0.8 |
| YPR2: -      | -3.7 | 0.3 | YDR3: SHE:  | -2.5 | 0.8 |
| YNL22 POP1   | -3.7 | 0.8 | YNL25 MRPI  | -2.5 | 0.8 |
| YGL01 ERG4   | -3.7 | 0.8 | YNL28 MRPI  | -2.5 | 0.8 |
| YHR0: BCD1   | -3.7 | 0.7 | YHR1: MSH:  | -2.5 | 0.8 |
| YPL09 SEC6:  | -3.6 | 0.9 | YLR09 ICT1  | -2.5 | 0.8 |
| YCR0: -      | -3.6 | 0.8 | YNR0: SMM   | -2.5 | 0.8 |
| YML01 SPT5   | -3.6 | 0.8 | YKR0: BCH:  | -2.5 | 0.8 |
| YJR01 TMA2:  | -3.6 | 0.9 | YOL1: HPF1  | -2.5 | 0.6 |
| YKR0: BCH2   | -3.6 | 0.7 | YNR0: TRM:  | -2.5 | 0.8 |
| YLL01: YEH1  | -3.6 | 0.7 | YOR3: RPA:  | -2.5 | 0.8 |
| YMR1: FOL3   | -3.6 | 0.8 | YEL03 MCM   | -2.5 | 0.8 |
| YJR13 MCM2   | -3.6 | 0.8 | YIR02: MRS: | -2.5 | 0.8 |
| YJR13 MNS1   | -3.6 | 0.8 | YOR2: MET:  | -2.5 | 0.8 |
| YNL04 SFB2   | -3.6 | 0.8 | YBR1: TFC1  | -2.5 | 0.8 |
| YER1: -      | -3.6 | 0.8 | YLR08 EMP:  | -2.5 | 0.8 |
| YNL07 RNH2:  | -3.6 | 0.7 | YGR1: -     | -2.5 | 0.8 |
| YCL00 -      | -3.6 | 0.8 | YPL24 HUT1  | -2.5 | 0.8 |
| YEL07 RMD6   | -3.6 | 0.8 | YMR2: RNT1  | -2.5 | 0.7 |
| YHR0: RRP4   | -3.6 | 0.9 | YNL26 ORC:  | -2.5 | 0.8 |
| YKL19 PEX1   | -3.6 | 0.7 | YDR5: LPP1  | -2.5 | 0.7 |
| YGL0: PIB2   | -3.6 | 0.8 | YOR1: AF11  | -2.5 | 0.8 |
| YGL01 CKB1   | -3.6 | 0.8 | YBR0: CST2  | -2.5 | 0.8 |
| YGR0: PRP31  | -3.6 | 0.8 | YGR1: UTP:  | -2.5 | 0.8 |
| YGL1: CEG1   | -3.6 | 0.8 | YDR4: PUF:  | -2.5 | 0.7 |
| YMR2: RNH1   | -3.6 | 0.8 | YAR0: SWD   | -2.5 | 0.8 |
| YLR18 MDL1   | -3.6 | 0.8 | YBR2: -     | -2.5 | 0.8 |
| YPL05 KTR6   | -3.5 | 0.8 | YDR2: -     | -2.5 | 0.8 |
| YOL0: -      | -3.5 | 0.9 | YJL07: PSF2 | -2.5 | 0.8 |
| YBR2: POP4   | -3.5 | 0.7 | YNL12 NAF1  | -2.5 | 0.8 |
| YDR1: RVB1   | -3.5 | 0.9 | YGL21 KIP3  | -2.5 | 0.8 |
| YLR13 NHA1   | -3.5 | 0.8 | YOR1: -     | -2.5 | 0.8 |
| YPL14 FRK1   | -3.5 | 0.8 | YNL03 GPI1: | -2.5 | 0.8 |
| YML0: RRN1:  | -3.5 | 0.6 | YGL24 RAI1  | -2.5 | 0.8 |
| YLR18 VTA1   | -3.5 | 0.8 | YOL1: CDC:  | -2.5 | 0.9 |
| YOR3: PIP2   | -3.5 | 0.7 | YML0: TDA:  | -2.5 | 0.8 |
| YIL07: THS1  | -3.5 | 0.8 | YBR2: DUT1  | -2.5 | 0.8 |
| YDR0: SES1   | -3.5 | 0.8 | YOR2: DED1  | -2.5 | 0.8 |
| YNR0: -      | -3.5 | 0.8 | YPL04 SSN:  | -2.5 | 0.8 |
| YOR0: CKA2   | -3.5 | 0.8 | YLR24 ARV1  | -2.5 | 0.8 |
| YIL15: AIM20 | -3.5 | 0.7 | YBL00 HTB2  | -2.5 | 0.8 |
| YNL02 -      | -3.5 | 0.6 | YCR0: PWP:  | -2.5 | 0.8 |
| YJR04 TAH11  | -3.5 | 0.9 | YNL29 CLA4  | -2.5 | 0.8 |
| YDR3: SSF2   | -3.5 | 0.7 | YLL01 SOF1  | -2.4 | 0.8 |
| YOR0: RRP6   | -3.5 | 0.7 | YGR2: TOS:  | -2.4 | 0.8 |
| YCL03 RRP7   | -3.5 | 0.8 | YPL12 TFB2  | -2.4 | 0.8 |
| YML07 FPR3   | -3.5 | 0.8 | YCR0: HTL1  | -2.4 | 0.7 |
| YNL04 BOP3   | -3.5 | 0.8 | YDR2: CIA1  | -2.4 | 0.8 |



|             |      |     |            |      |     |
|-------------|------|-----|------------|------|-----|
| YGL21 SKI8  | -3.5 | 0.8 | YGL22 SDT1 | -2.4 | 0.8 |
| YDR4 DOT1   | -3.5 | 0.8 | YNL24 RPA4 | -2.4 | 0.8 |
| YJL18 MNN1  | -3.5 | 0.8 | YCR0 -     | -2.4 | 0.7 |
| YMR0 BUD2   | -3.5 | 0.6 | YNR0 SNF1  | -2.4 | 0.8 |
| YGR2 FOL2   | -3.5 | 0.9 | YHR2 IMD2  | -2.4 | 0.7 |
| YNL12 NAF1  | -3.5 | 0.7 | YDR3 -     | -2.4 | 0.8 |
| YNR0 PDR1   | -3.5 | 0.4 | YDR3 ASP1  | -2.4 | 0.8 |
| YDR2 FMN1   | -3.5 | 0.8 | YER0 RPN   | -2.4 | 0.8 |
| YJL18 GON7  | -3.5 | 0.8 | YPL20 IPL1 | -2.4 | 0.8 |
| YGR2 ZUO1   | -3.4 | 0.8 | YOL1 HRT1  | -2.4 | 0.8 |
| YGR1 ASN2   | -3.4 | 0.8 | YMR3 PSE1  | -2.4 | 0.8 |
| YGR1 GTO1   | -3.4 | 0.8 | YOR3 RAX1  | -2.4 | 0.8 |
| YGL2 VEL1   | -3.4 | 0.7 | YMR2 CEF1  | -2.4 | 0.8 |
| YOR1 BFR1   | -3.4 | 0.8 | YDR4 RRP1  | -2.4 | 0.8 |
| YHR0 SSZ1   | -3.4 | 0.8 | YOR1 PNO   | -2.4 | 0.8 |
| YGL17 SAE2  | -3.4 | 0.7 | YIL08 SDS  | -2.4 | 0.8 |
| YBL00 UTP2  | -3.4 | 0.8 | YNL22 SSU7 | -2.4 | 0.8 |
| YDL14 -     | -3.4 | 0.8 | YML0 PIF1  | -2.4 | 0.8 |
| YLR22 CDC4  | -3.4 | 0.9 | YJR10 ABM  | -2.4 | 0.8 |
| YNR0 AGA1   | -3.4 | 0.5 | YJL11 PHO  | -2.4 | 0.8 |
| YAL00 SPO7  | -3.4 | 0.8 | YBL02 HAP  | -2.4 | 0.8 |
| YBR2 MAL3   | -3.4 | 0.4 | YKL19 DPH  | -2.4 | 0.8 |
| YGR2 MAL1   | -3.4 | 0.4 | YJR08 CSN1 | -2.4 | 0.9 |
| YLR28 -     | -3.4 | 0.7 | YMR0 AVO   | -2.4 | 0.7 |
| YER0 -      | -3.4 | 0.6 | YNL06 MTQ  | -2.4 | 0.8 |
| YJR01 MET3  | -3.4 | 0.7 | YDR1 HOM   | -2.4 | 0.8 |
| YMR1 -      | -3.4 | 0.8 | YMR2 TAF9  | -2.4 | 0.8 |
| YIL021 RPB3 | -3.4 | 0.8 | YGL01 KAP1 | -2.4 | 0.9 |
| YJR13 ECM1  | -3.4 | 0.7 | YNR0 PDR1  | -2.4 | 0.5 |
| YEL02 SNU1  | -3.4 | 0.9 | YBL08 -    | -2.4 | 0.7 |
| YIL15 MCM1  | -3.4 | 0.8 | YLR28 -    | -2.4 | 0.7 |
| YJL02 RRN7  | -3.4 | 0.8 | YML0 AIM3  | -2.4 | 0.3 |
| YPL06 BTS1  | -3.4 | 0.8 | YDL01 NOP  | -2.4 | 0.8 |
| YOR1 RGA1   | -3.4 | 0.8 | YBR1 CDC   | -2.4 | 0.8 |
| YFR0 SAD1   | -3.4 | 0.8 | YML01 -    | -2.4 | 0.8 |
| YDR0 MAK2   | -3.4 | 0.8 | YCR1 ADH   | -2.4 | 0.8 |
| YDR2 EBS1   | -3.4 | 0.7 | YBR1 PEX3  | -2.3 | 0.8 |
|             |      |     | YPL21 PUS1 | -2.3 | 0.8 |
|             |      |     | YHR0 -     | -2.3 | 0.8 |
|             |      |     | YOR1 SLP1  | -2.3 | 0.8 |
|             |      |     | YJR09 -    | -2.3 | 0.8 |
|             |      |     | YPL16 -    | -2.3 | 0.8 |
|             |      |     | YNL23 KEX2 | -2.3 | 0.8 |
|             |      |     | YOL0 RFC4  | -2.3 | 0.8 |
|             |      |     | YFR04 KEG  | -2.3 | 0.8 |
|             |      |     | YCL00 RER1 | -2.3 | 0.8 |
|             |      |     | YER0 GCD   | -2.3 | 0.9 |
|             |      |     | YOR3 SFG1  | -2.3 | 0.8 |
|             |      |     | YKL13 OCT1 | -2.3 | 0.8 |
|             |      |     | YJL20 ACO  | -2.3 | 0.8 |
|             |      |     | YDR3 MCM   | -2.3 | 0.8 |
|             |      |     | YMR1 EAR1  | -2.3 | 0.8 |
|             |      |     | YLR00 PAM  | -2.3 | 0.8 |
|             |      |     | YMR2 UBP   | -2.3 | 0.8 |
|             |      |     | YCL05 KRR1 | -2.3 | 0.8 |
|             |      |     | YLR43 IMD3 | -2.3 | 0.8 |
|             |      |     | YOL0 HST1  | -2.3 | 0.8 |
|             |      |     | YFR0 PHO   | -2.3 | 0.8 |
|             |      |     | YDL13 SRF1 | -2.3 | 0.8 |
|             |      |     | YKL01 ATP7 | -2.3 | 0.8 |
|             |      |     | YOL0 TRM   | -2.3 | 0.8 |
|             |      |     | YOR2 TMA1  | -2.3 | 0.8 |
|             |      |     | YBR2 TSC1  | -2.3 | 0.8 |
|             |      |     | YJR07 MIR1 | -2.3 | 0.8 |
|             |      |     | YLR17 CBF5 | -2.3 | 0.8 |
|             |      |     | YBL02 LSM  | -2.3 | 0.9 |
|             |      |     | YIL16 -    | -2.3 | 0.6 |
|             |      |     | YOL1 HPF1  | -2.3 | 0.6 |
|             |      |     | YOR1 LIP5  | -2.3 | 0.8 |
|             |      |     | YNL31 RFA2 | -2.3 | 0.9 |
|             |      |     | YOR1 RIO1  | -2.3 | 0.7 |

|       |      |      |     |
|-------|------|------|-----|
| YJL18 | MNN  | -2.3 | 0.8 |
| YJL19 | PHO  | -2.3 | 0.8 |
| YNL04 | ALG1 | -2.3 | 0.8 |
| YEL04 | TCA1 | -2.3 | 0.8 |
| YJR11 | -    | -2.3 | 0.8 |
| YER0  | -    | -2.3 | 0.5 |
| YDR1  | -    | -2.3 | 0.7 |
| YDR2  | CTA1 | -2.3 | 0.5 |
| YGL14 | ROG  | -2.3 | 0.7 |
| YLR24 | MAP  | -2.3 | 0.8 |
| YPR1  | YTH1 | -2.3 | 0.8 |
| YBL05 | PTH2 | -2.3 | 0.8 |
| YBR2  | OM1  | -2.3 | 0.8 |
| YOL1  | ZPS1 | -2.3 | 0.9 |
| YCL05 | FYV5 | -2.3 | 0.7 |
| YDR5  | PLM2 | -2.3 | 0.8 |
| YBR1  | RPB  | -2.3 | 0.8 |
| YDR0  | PPH  | -2.3 | 0.8 |
| YHR2  | SCH  | -2.3 | 0.8 |
| YOR2  | ESA1 | -2.3 | 0.9 |
| YNL17 | NOP  | -2.3 | 0.8 |
| YML0  | -    | -2.3 | 0.4 |
| YGL1  | SEH1 | -2.2 | 0.8 |
| YPR0  | NHP  | -2.2 | 0.8 |
| YPL07 | GPI2 | -2.2 | 0.7 |
| YLR43 | TSR2 | -2.2 | 0.8 |
| YPL26 | KAR  | -2.2 | 0.8 |
| YOR2  | ISU2 | -2.2 | 0.9 |
| YMR2  | PRP2 | -2.2 | 0.8 |
| YNL27 | BOR  | -2.2 | 0.8 |
| YOL2  | TSR4 | -2.2 | 0.8 |
| YNL06 | YDJ1 | -2.2 | 0.9 |
| YGR0  | SMD  | -2.2 | 0.9 |
| YGL17 | ROK  | -2.2 | 0.8 |
| YDR1  | HST4 | -2.2 | 0.8 |
| YNL32 | LEM  | -2.2 | 0.8 |
| YGR0  | MUQ  | -2.2 | 0.8 |
| YER0  | ICP5 | -2.2 | 0.8 |
