# Supplementary material for: Environmental Stresses Disrupt Telomere Length Homeostasis
Source: PubMed Central journal article supplement (PMC3764183; doi:10.1371/journal.pgen.1003721), 2013-09-05
Supplement: pgen.1003721.s008.pdf [file pgen.1003721.s008.pdf]

| Is TLM | Gene name    | Systematic name | Caffeine | 37°C | Ethanol |
|--------|--------------|-----------------|----------|------|---------|
| 0      | AAC1         | YMR056C         | 1        | -    | 1       |
| 0      | AAC3         | YBR085W         | -        | -    | -1      |
| 0      | AAD10        | YJR155W         | 1        | 1    | 1       |
| 0      | AAD15        | YOL165C         | 1        | -1   | -       |
| 0      | AAD16        | YFL057C         | 1        | -    | 1       |
| 0      | AAD3         | YCR107W         | 1        | -1   | -       |
| 0      | AAD4         | YDL243C         | 1        | -    | 1       |
| 0      | AAD6         | YFL056C         | -        | -    | 1       |
| 0      | AAH1         | YNL141W         | -1       | -    | -1      |
| 0      | AAT1         | YKL106W         | -1       | -    | -1      |
| 0      | ABC1         | YGL119W         | -        | 1    | -       |
| 0      | ABD1         | YBR236C         | 1        | -    | -       |
| 0      | ABF2         | YMR072W         | -        | -1   | -       |
| 0      | ABM1         | YJR108W         | -1       | -    | -       |
| 0      | ABP1         | YCR088W         | 1        | -    | -       |
| 0      | ABP140       | YOR239W         | -        | -1   | -       |
| 0      | ABZ2         | YMR289W         | -        | -    | -1      |
| 0      | ACA1         | YER045C         | 1        | -    | -       |
| 0      | ACB1         | YGR037C         | -        | -    | -1      |
| 0      | ACF2         | YLR144C         | -        | 1    | -       |
| 0      | ACH1         | YBL015W         | 1        | -    | -       |
| 0      | ACM1         | YPL267W         | -1       | -    | -       |
| 0      | ACN9         | YDR511W         | -        | 1    | 1       |
| 0      | ACO1         | YLR304C         | 1        | 1    | -       |
| 0      | ACO2         | YJL200C         | -1       | -    | -1      |
| 0      | ACP1         | YKL192C         | -        | 1    | -       |
| 0      | ACS1         | YAL054C         | 1        | 1    | -       |
| 0      | ADD66        | YKL206C         | -1       | -    | -       |
| 0      | ADE1         | YAR015W         | 1        | -1   | -       |
| 1      | <b>ADE12</b> | <b>YNL220W</b>  | 1        | -    | -1      |
| 0      | ADE13        | YLR359W         | 1        | -1   | -1      |
| 0      | ADE16        | YLR028C         | 1        | -    | -       |
| 0      | ADE17        | YMR120C         | 1        | -    | 1       |
| 0      | ADE2         | YOR128C         | 1        | -    | -       |
| 0      | ADE3         | YGR204W         | 1        | -    | -       |
| 0      | ADE4         | YMR300C         | 1        | -    | -       |
| 0      | ADE5,7       | YGL234W         | 1        | -    | -1      |
| 0      | ADE6         | YGR061C         | 1        | -1   | -1      |
| 0      | ADE8         | YDR408C         | 1        | -    | -       |
| 0      | ADH2         | YMR303C         | 1        | 1    | -       |
| 0      | ADH3         | YMR083W         | 1        | -    | -       |
| 0      | ADH4         | YGL256W         | -1       | -1   | -       |
| 0      | ADH5         | YBR145W         | -        | -    | 1       |
| 0      | ADH6         | YMR318C         | -        | 1    | -1      |
| 0      | ADH7         | YCR105W         | -1       | -    | -       |
| 0      | ADI1         | YMR009W         | -        | -    | -1      |
| 1      | <b>ADO1</b>  | <b>YJR105W</b>  | -        | -    | -1      |
| 0      | ADR1         | YDR216W         | 1        | 1    | 1       |
| 0      | AFG2         | YLR397C         | -1       | -    | -1      |

|                |                |    |    |    |
|----------------|----------------|----|----|----|
| 0 AFG3         | YER017C        | -  | -  | 1  |
| 0 AFI1         | YOR129C        | -1 | -  | -  |
| 0 AFR1         | YDR085C        | 1  | -  | -  |
| 0 AGA1         | YNR044W        | -1 | -1 | -1 |
| 0 AGA2         | YGL032C        | -1 | -1 | -  |
| 0 AGE1         | YDR524C        | -  | -1 | -  |
| 1 <b>AGP2</b>  | <b>YBR132C</b> | 1  | -  | -  |
| 0 AGX1         | YFL030W        | -  | 1  | 1  |
| 0 AHA1         | YDR214W        | -  | 1  | -  |
| 1 <b>AHC2</b>  | <b>YCR082W</b> | -  | 1  | -  |
| 0 AIF1         | YNR074C        | -  | -1 | -  |
| 0 AIM11        | YER093C-A      | -  | 1  | 1  |
| 0 AIM13        | YFR011C        | -  | 1  | 1  |
| 0 AIM17        | YHL021C        | 1  | 1  | 1  |
| 0 AIM18        | YHR198C        | -  | 1  | 1  |
| 0 AIM19        | YIL087C        | 1  | -  | 1  |
| 0 AIM2         | YAL049C        | -1 | -  | -  |
| 0 AIM20        | YIL158W        | -  | -1 | -1 |
| 0 AIM21        | YIR003W        | 1  | -  | -  |
| 0 AIM23        | YJL131C        | 1  | -  | 1  |
| 1 <b>AIM24</b> | <b>YJR080C</b> | -  | -  | 1  |
| 0 AIM3         | YBR108W        | -  | 1  | -  |
| 0 AIM32        | YML050W        | -  | 1  | 1  |
| 0 AIM33        | YML087C        | -1 | -  | -  |
| 0 AIM36        | YMR157C        | -  | 1  | -  |
| 0 AIM37        | YNL100W        | -1 | -  | -  |
| 0 AIM39        | YOL053W        | 1  | -  | 1  |
| 0 AIM4         | YBR194W        | -  | 1  | -  |
| 0 AIM41        | YOR215C        | 1  | -1 | 1  |
| 0 AIM45        | YPR004C        | 1  | 1  | 1  |
| 0 AIM46        | YHR199C        | 1  | 1  | -  |
| 0 AIM5         | YBR262C        | -  | 1  | 1  |
| 0 AIM7         | YDR063W        | -  | -  | 1  |
| 0 AIR1         | YIL079C        | -  | -  | -1 |
| 0 AIR2         | YDL175C        | -  | -  | 1  |
| 0 AKL1         | YBR059C        | 1  | -  | 1  |
| 0 AKR1         | YDR264C        | 1  | -  | -  |
| 0 AKR2         | YOR034C        | 1  | -  | -  |
| 1 <b>ALA1</b>  | <b>YOR335C</b> | -  | -1 | -1 |
| 0 ALB1         | YJL122W        | -  | -  | -1 |
| 0 ALD2         | YMR170C        | -  | 1  | -  |
| 0 ALD3         | YMR169C        | -  | 1  | 1  |
| 0 ALD4         | YOR374W        | 1  | 1  | 1  |
| 0 ALD5         | YER073W        | -1 | -1 | -  |
| 0 ALD6         | YPL061W        | -  | -  | -1 |
| 0 ALF1         | YNL148C        | 1  | -1 | -1 |
| 0 ALG11        | YNL048W        | -1 | -  | -  |
| 0 ALG3         | YBL082C        | -1 | -1 | -  |
| 0 ALG3         | YBL083C        | -1 | -1 | -  |
| 0 ALG5         | YPL227C        | -1 | -  | -  |

|   |              |                |    |    |    |
|---|--------------|----------------|----|----|----|
| 0 | ALK1         | YGL021W        | 1  | -  | -  |
| 0 | ALP1         | YNL270C        | 1  | 1  | 1  |
| 0 | ALR1         | YOL130W        | -  | -  | -1 |
| 0 | ALT1         | YLR089C        | 1  | -  | 1  |
| 0 | ALT2         | YDR111C        | -1 | -1 | -1 |
| 0 | AMD1         | YML035C        | -  | 1  | -  |
| 0 | AMD2         | YDR242W        | 1  | -  | -  |
| 0 | AME1         | YBR211C        | -  | -1 | -  |
| 0 | AMN1         | YBR158W        | -1 | -  | -  |
| 0 | AMS1         | YGL156W        | 1  | 1  | 1  |
| 0 | ANB1         | YJR047C        | 1  | -  | -  |
| 0 | ANT1         | YPR128C        | -1 | -1 | -1 |
| 0 | APA2         | YDR530C        | -  | -1 | 1  |
| 1 | <b>APC4</b>  | <b>YDR118W</b> | -1 | -1 | -  |
| 0 | APE2         | YKL157W        | 1  | -  | 1  |
| 0 | APJ1         | YNL077W        | 1  | -  | -  |
| 0 | APL1         | YJR005W        | 1  | -  | -  |
| 0 | APL6         | YGR261C        | 1  | -  | -  |
| 0 | APM3         | YBR288C        | -  | -1 | -  |
| 0 | APM4         | YOL062C        | -1 | -  | -1 |
| 0 | APP1         | YNL094W        | 1  | -  | -  |
| 0 | APQ12        | YIL040W        | -1 | -  | 1  |
| 0 | APS1         | YLR170C        | 1  | -  | -  |
| 0 | APT1         | YML022W        | -1 | -  | -1 |
| 0 | APT2         | YDR441C        | -1 | -  | -  |
| 0 | AQR1         | YNL065W        | -  | 1  | -  |
| 0 | AQY2         | YLL052C        | 1  | -  | -1 |
| 0 | ARA1         | YBR149W        | 1  | 1  | -  |
| 0 | ARB1         | YER036C        | -  | -  | -1 |
| 0 | ARC19        | YKL013C        | 1  | -  | -  |
| 0 | ARE1         | YCR048W        | 1  | 1  | -  |
| 0 | ARE2         | YNR019W        | -  | 1  | -  |
| 0 | ARF2         | YDL137W        | 1  | -  | 1  |
| 0 | ARG1         | YOL058W        | -  | -  | 1  |
| 1 | <b>ARG2</b>  | <b>YJL071W</b> | -  | 1  | -  |
| 0 | ARG3         | YJL088W        | -1 | 1  | 1  |
| 0 | ARG4         | YHR018C        | -  | -  | 1  |
| 0 | ARG5,6       | YER069W        | -  | 1  | -  |
| 0 | ARG8         | YOL140W        | -1 | 1  | -  |
| 0 | ARG80        | YMR042W        | 1  | -  | -  |
| 1 | <b>ARG82</b> | <b>YDR173C</b> | -1 | -  | -  |
| 0 | ARI1         | YGL157W        | -  | -  | -1 |
| 0 | ARK1         | YNL020C        | -  | 1  | -  |
| 0 | ARL1         | YBR164C        | -  | -  | -1 |
| 0 | ARL3         | YPL051W        | -  | -1 | -  |
| 0 | ARN1         | YHL040C        | 1  | -  | -  |
| 0 | ARN2         | YHL047C        | 1  | -1 | -  |
| 0 | ARO1         | YDR127W        | 1  | -  | -  |
| 0 | ARO10        | YDR380W        | 1  | 1  | 1  |
| 0 | ARO2         | YGL148W        | -  | -  | -1 |

|                |                |    |    |    |
|----------------|----------------|----|----|----|
| 0 ARO3         | YDR035W        | 1  | -1 | -  |
| 0 ARO4         | YBR249C        | -1 | -1 | -  |
| 0 ARO7         | YPR060C        | -1 | -  | -1 |
| 0 ARO80        | YDR421W        | -  | 1  | -  |
| 0 ARO9         | YHR137W        | 1  | 1  | 1  |
| 0 ARP1         | YHR129C        | -  | -  | -1 |
| 1 <b>ARP2</b>  | <b>YDL029W</b> | 1  | -  | -  |
| 0 ARP4         | YJL081C        | -  | -1 | -1 |
| 0 ARP5         | YNL059C        | 1  | -  | -  |
| 0 ARP9         | YMR033W        | -1 | -1 | -  |
| 0 ARR1         | YPR199C        | -1 | -  | -  |
| 0 ARR2         | YPR200C        | -  | -  | 1  |
| 0 ART10        | YLR392C        | -  | -  | 1  |
| 1 <b>ARV1</b>  | <b>YLR242C</b> | -1 | -  | -  |
| 0 ARX1         | YDR101C        | -1 | -  | -1 |
| 0 ASA1         | YPR085C        | -  | -  | -1 |
| 0 ASG7         | YJL170C        | -1 | -  | -  |
| 0 ASK1         | YKL052C        | -1 | -  | -  |
| 0 ASK10        | YGR097W        | 1  | -  | -1 |
| 0 ASN1         | YPR145W        | 1  | -1 | -  |
| 0 ASN2         | YGR124W        | -  | -  | -1 |
| 0 ASP1         | YDR321W        | -1 | -  | -1 |
| 0 ASP3-1       | YLR155C        | -  | -1 | -  |
| 0 ASP3-2       | YLR157C        | -  | -1 | -  |
| 0 ASP3-3       | YLR158C        | -  | -1 | -  |
| 0 ASP3-4       | YLR160C        | -  | -1 | -  |
| 0 AST1         | YBL069W        | -1 | -  | -  |
| 1 <b>ATC1</b>  | <b>YDR184C</b> | -1 | -  | -1 |
| 0 ATE1         | YGL017W        | -1 | -  | -  |
| 0 ATF1         | YOR377W        | -1 | -1 | -1 |
| 0 ATF2         | YGR177C        | 1  | -  | -1 |
| 0 ATG1         | YGL180W        | -  | 1  | -  |
| 0 ATG10        | YLL042C        | -1 | -1 | -  |
| 1 <b>ATG11</b> | <b>YPR049C</b> | -  | 1  | -  |
| 0 ATG13        | YPR185W        | 1  | -  | -  |
| 0 ATG14        | YBR128C        | -  | -  | 1  |
| 1 <b>ATG17</b> | <b>YLR423C</b> | -  | -  | 1  |
| 0 ATG18        | YFR021W        | -  | 1  | -  |
| 0 ATG19        | YOL082W        | 1  | -  | 1  |
| 0 ATG2         | YNL242W        | -  | 1  | 1  |
| 0 ATG20        | YDL113C        | 1  | -  | -  |
| 0 ATG22        | YCL038C        | 1  | 1  | 1  |
| 0 ATG23        | YLR431C        | 1  | -  | -  |
| 0 ATG26        | YLR189C        | 1  | 1  | -  |
| 0 ATG27        | YJL178C        | -1 | -1 | -  |
| 0 ATG29        | YPL166W        | 1  | -  | -  |
| 0 ATG33        | YLR356W        | 1  | -  | 1  |
| 0 ATG34        | YOL083W        | 1  | 1  | 1  |
| 0 ATG4         | YNL223W        | -  | -  | 1  |
| 0 ATG8         | YBL078C        | 1  | -  | 1  |

|   |             |                |    |    |    |
|---|-------------|----------------|----|----|----|
| 0 | ATG9        | YDL149W        | -  | 1  | 1  |
| 0 | ATH1        | YPR026W        | 1  | 1  | 1  |
| 1 | <b>ATM1</b> | <b>YMR301C</b> | -  | -  | -1 |
| 0 | ATO2        | YNR002C        | 1  | 1  | -  |
| 0 | ATO3        | YDR384C        | -  | -1 | -1 |
| 0 | ATP10       | YLR393W        | -  | 1  | -  |
| 0 | ATP12       | YJL180C        | -  | -  | 1  |
| 0 | ATP14       | YLR295C        | -  | -  | 1  |
| 0 | ATP15       | YPL271W        | -  | -  | 1  |
| 0 | ATP17       | YDR377W        | -  | -  | 1  |
| 0 | ATP18       | YML081C-A      | -  | -  | 1  |
| 0 | ATP20       | YPR020W        | -  | -  | 1  |
| 0 | ATP25       | YMR098C        | -  | 1  | -  |
| 0 | ATP3        | YBR039W        | -  | -  | 1  |
| 0 | ATP4        | YPL078C        | -  | -  | 1  |
| 0 | ATP5        | YDR298C        | -  | -1 | 1  |
| 0 | ATP7        | YKL016C        | -1 | -  | 1  |
| 0 | ATR1        | YML116W        | -  | -  | 1  |
| 0 | ATX2        | YOR079C        | -  | -1 | -1 |
| 0 | AUR1        | YKL004W        | -  | -  | -1 |
| 0 | AUS1        | YOR011W        | 1  | -1 | -1 |
| 0 | AVL9        | YLR114C        | 1  | -  | -  |
| 0 | AVO2        | YMR068W        | -1 | -  | -  |
| 0 | AVT6        | YER119C        | -  | 1  | -  |
| 0 | AVT7        | YIL088C        | -  | -  | 1  |
| 0 | AXL1        | YPR122W        | -1 | -  | 1  |
| 0 | AYR1        | YIL124W        | -  | -  | 1  |
| 0 | AYT1        | YLL063C        | 1  | -1 | -  |
| 0 | AZF1        | YOR113W        | -  | 1  | -  |
| 0 | BAP2        | YBR068C        | -1 | -  | -  |
| 0 | BAP3        | YDR046C        | -1 | -  | -  |
| 0 | BAR1        | YIL015W        | -1 | -1 | -  |
| 0 | BAS1        | YKR099W        | -  | -  | -1 |
| 0 | BAT1        | YHR208W        | -1 | -1 | -  |
| 0 | BAT2        | YJR148W        | 1  | -  | -  |
| 0 | BBC1        | YJL020C        | 1  | 1  | 1  |
| 1 | <b>BBP1</b> | <b>YPL255W</b> | -  | -1 | -  |
| 0 | BCD1        | YHR040W        | -  | -  | -1 |
| 0 | BCH1        | YMR237W        | -  | 1  | -  |
| 0 | BCH2        | YKR027W        | -1 | -  | -1 |
| 0 | BCP1        | YDR361C        | -  | -  | -1 |
| 0 | BDH1        | YAL060W        | 1  | 1  | -  |
| 0 | BDH2        | YAL061W        | -  | 1  | -  |
| 0 | BDS1        | YOL164W        | -  | -1 | -1 |
| 0 | BER1        | YLR412W        | -1 | -1 | -1 |
| 0 | BET1        | YIL004C        | -  | -  | -1 |
| 0 | BET3        | YKR068C        | -1 | -  | -  |
| 0 | BET5        | YML077W        | -  | -  | -1 |
| 0 | BFR1        | YOR198C        | -  | -1 | -1 |
| 0 | BFR2        | YDR299W        | -  | -  | -1 |

|                |                |    |    |    |
|----------------|----------------|----|----|----|
| 0 BGL2         | YGR282C        | 1  | -  | -  |
| 0 BIM1         | YER016W        | -  | -1 | -  |
| 0 BIO2         | YGR286C        | -  | -  | -1 |
| 0 BIO3         | YNR058W        | 1  | -  | -1 |
| 0 BIO4         | YNR057C        | -1 | -  | -  |
| 0 BIT61        | YJL058C        | -  | 1  | -  |
| 0 BLI1         | YKLO61W        | 1  | -  | -  |
| 0 BLS1         | YLR408C        | -  | -  | 1  |
| 1 <b>BMH2</b>  | <b>YDR099W</b> | 1  | -  | -  |
| 0 BNA1         | YJR025C        | -  | 1  | 1  |
| 0 BNA2         | YJR078W        | 1  | 1  | 1  |
| 0 BNA4         | YBL098W        | 1  | 1  | 1  |
| 0 BNA6         | YFR047C        | -  | 1  | -  |
| 0 BNA7         | YDR428C        | -  | -  | -1 |
| 0 BNI1         | YNL271C        | 1  | -  | -  |
| 0 BNR1         | YIL159W        | -  | 1  | -  |
| 0 BOP2         | YLR267W        | 1  | 1  | -  |
| 0 BOP3         | YNL042W        | -  | -  | -1 |
| 0 BOR1         | YNL275W        | -1 | -  | -  |
| 0 BOS1         | YLR078C        | -1 | -  | -  |
| 0 BPH1         | YCR032W        | 1  | -  | -  |
| 1 <b>BRE2</b>  | <b>YLR015W</b> | -  | -  | -1 |
| 0 BRE5         | YNR051C        | -  | -1 | -  |
| 0 BRF1         | YGR246C        | -  | -1 | -  |
| 0 BRL1         | YHR036W        | -1 | -  | -  |
| 0 BRR1         | YPR057W        | -1 | -1 | -  |
| 0 BRR6         | YGL247W        | -1 | -  | -  |
| 0 BRX1         | YOL077C        | -1 | -1 | -1 |
| 0 BSC2         | YDR275W        | -  | -  | 1  |
| 0 BTN2         | YGR142W        | -1 | -  | -  |
| 0 BTS1         | YPL069C        | -1 | -  | -1 |
| 1 <b>BUD21</b> | <b>YOR078W</b> | -  | -  | -1 |
| 0 BUD22        | YMR014W        | -  | -  | -1 |
| 1 <b>BUD23</b> | <b>YCR047C</b> | -1 | -  | -1 |
| 0 BUD25        | YER014C-A      | 1  | -  | -  |
| 0 BUD4         | YJR092W        | 1  | -  | -  |
| 0 BUD5         | YCL068C        | -1 | -  | -  |
| 0 BUD5         | YCR038C        | -1 | -  | -  |
| 0 BUD8         | YLR353W        | -1 | -  | 1  |
| 0 BUL1         | YMR275C        | 1  | -  | -  |
| 0 BUR6         | YER159C        | 1  | -  | 1  |
| 0 BXI1         | YNL305C        | 1  | 1  | 1  |
| 0 CAB1         | YDR531W        | -  | -  | -1 |
| 0 CAB2         | YIL083C        | 1  | -  | -  |
| 0 CAB5         | YDR196C        | -1 | -  | -  |
| 0 CAC2         | YML102W        | -1 | -  | -  |
| 0 CAF120       | YNL278W        | 1  | -  | -  |
| 0 CAF17        | YJR122W        | -  | 1  | 1  |
| 0 CAF20        | YOR276W        | -1 | -  | -  |
| 0 CAF40        | YNL288W        | -1 | -  | -  |

|                |                  |    |    |    |
|----------------|------------------|----|----|----|
| 0 CAJ1         | YER048C          | -  | -  | -1 |
| 0 CAR1         | YPL111W          | -  | -  | -1 |
| 0 CAR2         | YLR438W          | 1  | 1  | -  |
| 0 CAT2         | YML042W          | -  | 1  | -  |
| 0 CAT5         | YOR125C          | -  | -  | 1  |
| 1 <b>CAX4</b>  | <b>YGR036C</b>   | -  | -  | -1 |
| 1 <b>CBC2</b>  | <b>YPL178W</b>   | -1 | -1 | -  |
| 0 CBF1         | YJR060W          | -1 | -  | -  |
| 1 <b>CBF5</b>  | <b>YLR175W</b>   | -1 | -1 | -1 |
| 0 CBK1         | YNL161W          | -  | 1  | -  |
| 0 CBP4         | YGR174C          | -  | 1  | 1  |
| 0 CBP6         | YBR120C          | -  | -  | 1  |
| 0 CCM1         | YGR150C          | -  | 1  | -  |
| 0 CCP1         | YKR066C          | -  | 1  | -  |
| 0 CCT2         | YIL142W          | -  | -  | -1 |
| 0 CCT3         | YJL014W          | -1 | -1 | -1 |
| 0 CCT4         | YDL143W          | -  | -  | -1 |
| 0 CCT5         | YJR064W          | -  | -  | -1 |
| 0 CCT7         | YJL111W          | -  | -1 | -1 |
| 0 CCT8         | YJL008C          | -  | -1 | -1 |
| 1 <b>CCW14</b> | <b>YLR390W-A</b> | 1  | -  | -  |
| 0 CDA1         | YLR307W          | -  | 1  | -  |
| 0 CDC12        | YHR107C          | -  | -1 | -  |
| 0 CDC26        | YFR036W          | -  | 1  | -  |
| 0 CDC28        | YBR160W          | -1 | 1  | -  |
| 0 CDC33        | YOL139C          | -1 | -1 | -1 |
| 1 <b>CDC36</b> | <b>YDL165W</b>   | -1 | -1 | -1 |
| 0 CDC4         | YFL009W          | -  | 1  | -  |
| 0 CDC40        | YDR364C          | -  | -  | -1 |
| 0 CDC42        | YLR229C          | -  | -1 | -1 |
| 0 CDC43        | YGL155W          | -1 | -1 | -  |
| 0 CDC5         | YMR001C          | -  | -1 | -  |
| 0 CDC55        | YGL190C          | -1 | -  | -  |
| 0 CDC7         | YDL017W          | -  | -  | -1 |
| 1 <b>CDC73</b> | <b>YLR418C</b>   | -1 | -1 | -  |
| 0 CDD1         | YLR245C          | -  | 1  | -  |
| 0 CEF1         | YMR213W          | -1 | -  | -  |
| 0 CEG1         | YGL130W          | -  | -  | -1 |
| 0 CEM1         | YER061C          | 1  | 1  | 1  |
| 0 CFD1         | YIL003W          | -  | -  | -1 |
| 0 CGR1         | YGL029W          | -  | -  | -1 |
| 0 CHC1         | YGL206C          | 1  | 1  | -  |
| 0 CHD1         | YER164W          | -1 | -  | -  |
| 0 CHL4         | YDR254W          | -  | -1 | -  |
| 0 CHS1         | YNL192W          | 1  | -  | -  |
| 0 CHS6         | YJL099W          | 1  | -  | -1 |
| 0 CHZ1         | YER030W          | 1  | -  | -  |
| 0 CIA1         | YDR267C          | -1 | -1 | -1 |
| 0 CIC1         | YHR052W          | -1 | -  | -1 |
| 0 CIN1         | YOR349W          | -  | 1  | -  |

|         |           |    |    |    |
|---------|-----------|----|----|----|
| 0 CIN2  | YPL241C   | -  | -1 | -  |
| 0 CIN4  | YMR138W   | -  | -1 | -1 |
| 0 CIN5  | YOR028C   | -1 | -  | -1 |
| 0 CIR1  | YGR207C   | 1  | 1  | 1  |
| 0 CIR2  | YOR356W   | -1 | -  | -  |
| 0 CIT1  | YNR001C   | 1  | 1  | 1  |
| 0 CIT2  | YCR005C   | 1  | -  | 1  |
| 0 CIT3  | YPR001W   | 1  | 1  | 1  |
| 0 CKA2  | YOR061W   | -  | -  | -1 |
| 0 CKB1  | YGL019W   | -1 | -  | -1 |
| 0 CKB2  | YOR039W   | -  | -1 | -1 |
| 0 CLA4  | YNL298W   | -1 | -  | -1 |
| 0 CLB1  | YGR108W   | -1 | -  | 1  |
| 0 CLB3  | YDL155W   | -1 | -  | -  |
| 0 CLB4  | YLR210W   | -1 | -  | -  |
| 0 CLB5  | YPR120C   | -1 | -  | -  |
| 0 CLB6  | YGR109C   | -1 | -  | -  |
| 0 CLC1  | YGR167W   | 1  | -  | -  |
| 0 CLD1  | YGR110W   | -  | 1  | 1  |
| 0 CLG1  | YGL215W   | 1  | -  | -  |
| 0 CLN1  | YMR199W   | -  | -  | 1  |
| 0 CLN2  | YPL256C   | -  | -  | 1  |
| 0 CLP1  | YOR250C   | -1 | -  | -  |
| 0 CMC2  | YBL059C-A | -  | 1  | 1  |
| 0 CMC4  | YMR194C-B | 1  | 1  | 1  |
| 0 CMK2  | YOL016C   | 1  | 1  | 1  |
| 0 CMP2  | YML057W   | 1  | -  | -  |
| 0 CMS1  | YLR003C   | -  | -1 | -1 |
| 0 CNL1  | YDR357C   | 1  | -  | -  |
| 0 CNS1  | YBR155W   | -  | -  | -1 |
| 0 COA1  | YIL157C   | -  | 1  | 1  |
| 0 COA2  | YPL189C-A | -1 | -  | -  |
| 0 COA3  | YJL062W-A | -  | 1  | -  |
| 0 COA4  | YLR218C   | 1  | 1  | 1  |
| 0 COG7  | YGL005C   | -  | -1 | -  |
| 0 COQ1  | YBR003W   | -  | -  | 1  |
| 0 COQ2  | YNR041C   | -1 | -  | -  |
| 0 COQ5  | YML110C   | -  | 1  | 1  |
| 0 COQ6  | YGR255C   | 1  | -  | 1  |
| 0 COQ9  | YLR201C   | -  | -  | 1  |
| 0 COR1  | YBL045C   | -  | -  | 1  |
| 0 COS1  | YNL336W   | 1  | -1 | 1  |
| 0 COS12 | YGL263W   | 1  | -  | -  |
| 0 COS2  | YBR302C   | 1  | -1 | -  |
| 0 COS3  | YML132W   | 1  | -1 | -  |
| 0 COS4  | YFL062W   | 1  | -1 | 1  |
| 0 COS5  | YJR161C   | 1  | -1 | -  |
| 0 COS6  | YGR295C   | 1  | -1 | 1  |
| 0 COS7  | YDL248W   | 1  | -1 | -  |
| 0 COS8  | YHL048W   | 1  | -1 | 1  |



|                |                |    |    |    |
|----------------|----------------|----|----|----|
| 0 COS9         | YKL219W        | 1  | -  | -  |
| 0 COT1         | YOR316C        | 1  | -  | -  |
| 0 COX12        | YLR038C        | -  | -  | 1  |
| 0 COX13        | YGL191W        | -  | -  | 1  |
| 0 COX14        | YML129C        | -  | 1  | 1  |
| 0 COX15        | YER141W        | 1  | -  | 1  |
| 0 COX16        | YJL003W        | -  | -  | 1  |
| 0 COX17        | YLL009C        | -  | 1  | 1  |
| 0 COX18        | YGR062C        | -  | -  | 1  |
| 0 COX20        | YDR231C        | 1  | 1  | 1  |
| 0 COX23        | YHR116W        | -  | 1  | -  |
| 0 COX4         | YGL187C        | -1 | -1 | 1  |
| 0 COX5A        | YNL052W        | -1 | -  | -  |
| 0 COX5B        | YIL111W        | 1  | 1  | 1  |
| 0 COX6         | YHR051W        | -  | -  | 1  |
| 0 COX7         | YMR256C        | -  | -  | 1  |
| 0 COX8         | YLR395C        | -1 | -  | 1  |
| 0 COX9         | YDL067C        | -  | -  | 1  |
| 0 CPA1         | YOR303W        | 1  | 1  | -  |
| 0 CPA2         | YJR109C        | 1  | -  | 1  |
| 0 CPR2         | YHR057C        | -  | -1 | -  |
| 0 CPR4         | YCR069W        | 1  | -  | -  |
| 0 CPR6         | YLR216C        | -  | 1  | -  |
| 0 CPR7         | YJR032W        | -  | -  | -1 |
| 0 CPR8         | YNR028W        | -  | -1 | 1  |
| 0 CPS1         | YJL172W        | 1  | 1  | -  |
| 0 CPT1         | YNL130C        | -  | 1  | -  |
| 0 CRC1         | YOR100C        | 1  | 1  | 1  |
| 0 CRG1         | YHR209W        | 1  | 1  | -  |
| 0 CRH1         | YGR189C        | 1  | -  | -  |
| 0 CRP1         | YHR146W        | -  | -1 | -  |
| 0 CRR1         | YLR213C        | 1  | -  | -  |
| 0 CRS5         | YOR031W        | -  | 1  | -  |
| 0 CRT10        | YOL063C        | -  | 1  | -  |
| 0 CSH1         | YBR161W        | -  | -  | 1  |
| 0 CSI1         | YMR025W        | 1  | -  | -  |
| 0 CSI2         | YOL007C        | -1 | -  | -  |
| 0 CSL4         | YNL232W        | -1 | -  | -  |
| 1 <b>CSM1</b>  | <b>YCR086W</b> | -  | 1  | -  |
| 0 CSN12        | YJR084W        | -1 | -  | -  |
| 0 CSN9         | YDR179C        | 1  | -  | -  |
| 0 CSR1         | YLR380W        | -  | -  | -1 |
| 0 CST26        | YBR042C        | -1 | -1 | -1 |
| 1 <b>CST6</b>  | <b>YIL036W</b> | -  | 1  | -  |
| 0 CST9         | YLR394W        | -  | 1  | -  |
| 0 CTA1         | YDR256C        | -1 | -  | -  |
| 1 <b>CTF18</b> | <b>YMR078C</b> | 1  | -  | -  |
| 1 <b>CTF8</b>  | <b>YHR191C</b> | -1 | -  | -  |
| 0 CTK2         | YJL006C        | -1 | -  | -  |
| 0 CTL1         | YMR180C        | 1  | -  | -  |

|               |                |    |    |    |
|---------------|----------------|----|----|----|
| 0 CTP1        | YBR291C        | -1 | -  | -1 |
| 0 CTR1        | YPR124W        | 1  | -  | -  |
| 0 CTT1        | YGR088W        | -  | 1  | -  |
| 0 CUE2        | YKL090W        | -1 | -  | -  |
| 0 CUE3        | YGL110C        | -  | -1 | -  |
| 0 CUE4        | YML101C        | -  | -  | 1  |
| 0 CUE5        | YOR042W        | 1  | -  | -  |
| 0 CUP1-1      | YHR053C        | -  | -  | 1  |
| 0 CUP1-2      | YHR055C        | -  | -  | 1  |
| 0 CUP2        | YGL166W        | -  | 1  | -  |
| 0 CUR1        | YPR158W        | -  | -  | 1  |
| 0 CUS1        | YMR240C        | -  | -1 | -  |
| 0 CWC2        | YDL209C        | -  | -1 | -  |
| 0 CWC21       | YDR482C        | 1  | -  | -1 |
| 0 CWC25       | YNL245C        | -  | 1  | -  |
| 0 CWH41       | YGL027C        | 1  | -  | -  |
| 0 CWP1        | YKL096W        | -  | 1  | -  |
| 0 CWP2        | YKL096W-A      | -  | -  | 1  |
| 0 CYB2        | YML054C        | -  | -  | -1 |
| 0 CYB5        | YNL111C        | 1  | -  | -  |
| 0 CYC1        | YJR048W        | -1 | -  | -1 |
| 0 CYC3        | YAL039C        | 1  | 1  | 1  |
| 0 CYC7        | YEL039C        | 1  | 1  | 1  |
| 0 CYM1        | YDR430C        | -  | 1  | -  |
| 1 <b>CYR1</b> | <b>YJL005W</b> | 1  | 1  | 1  |
| 0 CYS3        | YAL012W        | -  | -  | -1 |
| 0 CYS4        | YGR155W        | -1 | -  | -  |
| 0 CYT1        | YOR065W        | -1 | -  | 1  |
| 0 CYT2        | YKL087C        | -  | 1  | 1  |
| 0 DAK1        | YML070W        | -  | 1  | -  |
| 0 DAL1        | YIR027C        | 1  | 1  | -  |
| 0 DAL3        | YIR032C        | 1  | 1  | -  |
| 0 DAL5        | YJR152W        | 1  | -  | -  |
| 0 DAL7        | YIR031C        | 1  | -  | -  |
| 0 DAN1        | YJR150C        | 1  | -  | 1  |
| 0 DAN2        | YLR037C        | 1  | -  | -  |
| 0 DAN3        | YBR301W        | 1  | -  | -  |
| 0 DAN4        | YJR151C        | 1  | -  | -  |
| 0 DAP1        | YPL170W        | 1  | -  | -  |
| 0 DAS1        | YJL149W        | 1  | 1  | -  |
| 0 DAS2        | YDR020C        | -1 | -  | -1 |
| 0 DAT1        | YML113W        | -  | -  | -1 |
| 0 DBP10       | YDL031W        | -  | -  | -1 |
| 0 DBP2        | YNL112W        | -1 | -1 | -1 |
| 0 DBP3        | YGL078C        | -  | -  | -1 |
| 0 DBP6        | YNR038W        | -  | -  | -1 |
| 0 DBP7        | YKR024C        | -  | -  | -1 |
| 0 DBP8        | YHR169W        | -1 | -  | -1 |
| 0 DBP9        | YLR276C        | -  | -  | -1 |
| 0 DCP1        | YOL149W        | -  | -1 | -  |

|               |                |    |    |    |
|---------------|----------------|----|----|----|
| 0 DCS1        | YLR270W        | 1  | 1  | 1  |
| 0 DCS2        | YOR173W        | 1  | 1  | 1  |
| 0 DCW1        | YKL046C        | 1  | -  | -  |
| 0 DDR2        | YOL052C-A      | 1  | 1  | 1  |
| 0 DDR48       | YMR173W        | -  | 1  | 1  |
| 0 DDR48       | YMR173W-A      | -  | 1  | 1  |
| 0 DED1        | YOR204W        | -1 | -  | -  |
| 0 DEG1        | YFL001W        | -  | -  | -1 |
| 0 DFG5        | YMR238W        | 1  | -  | -  |
| 0 DFR1        | YOR236W        | -1 | -1 | -  |
| 0 DGA1        | YOR245C        | -  | -  | 1  |
| 0 DGR2        | YKL121W        | -  | -  | 1  |
| 0 DHR2        | YKL078W        | -1 | -  | -1 |
| 0 DIA1        | YMR316W        | 1  | 1  | -  |
| 0 DIA4        | YHR011W        | -  | -  | 1  |
| 0 DIC1        | YLR348C        | -  | -  | 1  |
| 0 DID4        | YKL002W        | -  | -1 | -  |
| 0 DIF1        | YLR437C        | 1  | -  | -  |
| 0 DIM1        | YPL266W        | -  | -  | -1 |
| 0 DIN7        | YDR263C        | -  | -  | 1  |
| 0 DIP2        | YLR129W        | -  | -  | -1 |
| 0 DIP5        | YPL265W        | 1  | -  | -  |
| 0 DIS3        | YOL021C        | -1 | -  | -  |
| 0 DIT1        | YDR403W        | 1  | 1  | 1  |
| 0 DJP1        | YIR004W        | -  | -1 | -  |
| 0 DLD2        | YDL178W        | 1  | -1 | -  |
| 0 DLD3        | YEL071W        | 1  | -  | -  |
| 0 DLS1        | YJL065C        | -1 | -  | -  |
| 0 DLT1        | YMR126C        | -1 | -1 | -  |
| 0 DMA1        | YHR115C        | -  | 1  | -  |
| 0 DMC1        | YER179W        | -  | -  | -1 |
| 0 DML1        | YMR211W        | -1 | -  | -  |
| 0 DNA2        | YHR164C        | -  | 1  | -  |
| 0 DOA1        | YKL213C        | -  | 1  | -  |
| 1 <b>DOA4</b> | <b>YDR069C</b> | -  | 1  | 1  |
| 0 DOG1        | YHR044C        | 1  | -  | 1  |
| 0 DOG2        | YHR043C        | 1  | -  | 1  |
| 0 DOP1        | YDR141C        | -  | 1  | -  |
| 1 <b>DOT1</b> | <b>YDR440W</b> | -  | -1 | -1 |
| 0 DOT6        | YER088C        | -  | 1  | 1  |
| 1 <b>DPB4</b> | <b>YDR121W</b> | -  | -  | -1 |
| 0 DPH1        | YIL103W        | -1 | -  | -1 |
| 0 DPH2        | YKL191W        | -1 | -  | -1 |
| 0 DPH5        | YLR172C        | -  | -  | -1 |
| 0 DPP1        | YDR284C        | -  | -  | 1  |
| 0 DRE2        | YKR071C        | -1 | -  | -  |
| 0 DRS1        | YLL008W        | -  | -  | -1 |
| 0 DSE1        | YER124C        | -1 | -  | -  |
| 0 DSE4        | YNR067C        | 1  | 1  | -1 |
| 0 DSF1        | YEL070W        | 1  | -  | -  |

|               |                |    |    |    |
|---------------|----------------|----|----|----|
| 0 DSF1        | YNR073C        | 1  | -  | -  |
| 0 DSF2        | YBR007C        | -  | -  | 1  |
| 0 DST1        | YGL043W        | -  | -  | -1 |
| 0 DUF1        | YOL087C        | 1  | 1  | 1  |
| 0 DUG3        | YNL191W        | -1 | 1  | -  |
| <b>1 DUN1</b> | <b>YDL101C</b> | -  | -  | 1  |
| 0 DUO1        | YGL061C        | -  | -1 | -  |
| 0 DUR1,2      | YBR208C        | 1  | -  | -1 |
| 0 DUR3        | YHL016C        | 1  | -  | -  |
| 0 DUS1        | YML080W        | -1 | -  | -1 |
| 0 DUS3        | YLR401C        | -  | -  | -1 |
| 0 DUS4        | YLR405W        | -1 | -  | -  |
| 0 DUT1        | YBR252W        | -1 | -  | -1 |
| 0 EAF6        | YJR082C        | -  | 1  | -  |
| 0 EAR1        | YMR171C        | -1 | -  | -  |
| 0 EBP2        | YKL172W        | -  | -  | -1 |
| <b>1 EBS1</b> | <b>YDR206W</b> | -  | -  | -1 |
| 0 ECL1        | YGR146C        | 1  | -  | -  |
| 0 ECM1        | YAL059W        | -1 | -  | -1 |
| 0 ECM10       | YEL030W        | -  | -  | -1 |
| 0 ECM13       | YBL043W        | -  | -  | 1  |
| 0 ECM15       | YBL001C        | 1  | 1  | -  |
| 0 ECM16       | YMR128W        | -  | -  | -1 |
| 0 ECM17       | YJR137C        | -  | -  | -1 |
| 0 ECM19       | YLR390W        | -  | 1  | -  |
| 0 ECM2        | YBR065C        | -  | -  | -1 |
| 0 ECM21       | YBL101C        | 1  | 1  | -  |
| 0 ECM22       | YLR228C        | -  | -  | -1 |
| 0 ECM27       | YJR106W        | 1  | -  | -1 |
| 0 ECM29       | YHL030W        | -  | 1  | -  |
| 0 ECM3        | YOR092W        | -  | 1  | 1  |
| 0 ECM30       | YLR436C        | 1  | 1  | 1  |
| 0 ECM38       | YLR299W        | 1  | 1  | -  |
| 0 ECM4        | YKR076W        | 1  | 1  | 1  |
| 0 ECM40       | YMR062C        | 1  | 1  | -  |
| 0 ECM5        | YMR176W        | 1  | -  | -  |
| 0 ECM8        | YBR076W        | -  | 1  | -  |
| 0 EDC1        | YGL222C        | -  | -  | 1  |
| 0 EDC2        | YER035W        | 1  | 1  | 1  |
| 0 EDC3        | YEL015W        | -1 | -1 | -1 |
| 0 EDE1        | YBL047C        | 1  | 1  | 1  |
| 0 EDS1        | YBR033W        | 1  | -  | -  |
| 0 EFM1        | YHL039W        | -  | -  | -1 |
| 0 EFM2        | YBR271W        | -1 | -1 | -1 |
| 0 EHT1        | YBR177C        | -  | 1  | 1  |
| 0 ELO1        | YJL196C        | -1 | -  | -1 |
| 0 ELP2        | YGR200C        | -1 | -  | -1 |
| 0 ELP3        | YPL086C        | -1 | -  | -1 |
| 0 ELP4        | YPL101W        | -1 | -1 | -1 |
| 0 ELP6        | YMR312W        | -  | -  | -1 |

|   |             |                |    |    |    |
|---|-------------|----------------|----|----|----|
| 0 | EMG1        | YLR186W        | -1 | -  | -1 |
| 0 | EMI1        | YDR512C        | 1  | 1  | -1 |
| 0 | EMI2        | YDR516C        | -  | 1  | 1  |
| 0 | EMI5        | YOL071W        | -  | 1  | -  |
| 0 | EMP46       | YLR080W        | 1  | 1  | 1  |
| 0 | EMP70       | YLR083C        | -1 | -1 | -1 |
| 0 | EMW1        | YNL313C        | -1 | -  | -1 |
| 0 | ENB1        | YOL158C        | 1  | -  | -1 |
| 0 | ENO1        | YGR254W        | -  | 1  | 1  |
| 0 | ENP1        | YBR247C        | -1 | -  | -1 |
| 0 | ENP2        | YGR145W        | -  | -  | -1 |
| 0 | ENT2        | YLR206W        | 1  | -  | -  |
| 0 | ENT5        | YDR153C        | -1 | -  | -  |
| 0 | ENV10       | YLR065C        | -  | -1 | -1 |
| 0 | ENV7        | YPL236C        | -  | -  | 1  |
| 0 | ENV9        | YOR246C        | -  | -  | -1 |
| 0 | EOS1        | YNL080C        | -1 | -  | -  |
| 0 | EPL1        | YFL024C        | 1  | -  | -  |
| 0 | EPS1        | YIL005W        | -  | -1 | -  |
| 0 | ERB1        | YMR049C        | -1 | -  | -1 |
| 0 | ERC1        | YHR032W        | -1 | -  | -1 |
| 0 | ERD1        | YDR414C        | -1 | -1 | -  |
| 0 | ERF2        | YLR246W        | -  | -  | 1  |
| 0 | ERG1        | YGR175C        | 1  | -  | -  |
| 0 | ERG10       | YPL028W        | -  | -  | -1 |
| 0 | ERG11       | YHR007C        | 1  | -  | -  |
| 0 | ERG12       | YMR208W        | 1  | -  | -  |
| 0 | ERG13       | YML126C        | -  | -  | -1 |
| 1 | <b>ERG2</b> | <b>YMR202W</b> | 1  | -  | -1 |
| 0 | ERG25       | YGR060W        | 1  | -  | -  |
| 0 | ERG26       | YGL001C        | 1  | -  | -  |
| 0 | ERG27       | YLR100W        | -  | -  | -1 |
| 0 | ERG28       | YER044C        | 1  | 1  | 1  |
| 0 | ERG3        | YLR056W        | 1  | -  | -  |
| 0 | ERG4        | YGL012W        | 1  | -  | -1 |
| 0 | ERG5        | YMR015C        | 1  | -  | -  |
| 0 | ERG6        | YML008C        | 1  | -  | -1 |
| 0 | ERG7        | YHR072W        | 1  | -  | -1 |
| 0 | ERG8        | YMR220W        | 1  | -1 | -1 |
| 0 | ERG9        | YHR190W        | 1  | -  | -  |
| 1 | <b>ERJ5</b> | <b>YFR041C</b> | -  | -1 | -  |
| 0 | ERO1        | YML130C        | -  | 1  | 1  |
| 0 | ERP6        | YGL002W        | -1 | -  | -  |
| 0 | ERS1        | YCR075C        | -  | -  | 1  |
| 0 | ERT1        | YBR239C        | -1 | -  | -  |
| 0 | ERV2        | YPR037C        | -1 | -1 | -  |
| 1 | <b>ESA1</b> | <b>YOR244W</b> | -1 | -  | -  |
| 0 | ESBP6       | YNL125C        | 1  | 1  | 1  |
| 0 | ESC1        | YMR219W        | 1  | -  | -  |
| 0 | ESF2        | YNR054C        | -  | -  | -1 |

|   |             |                |    |    |    |
|---|-------------|----------------|----|----|----|
| 1 | <b>ESS1</b> | <b>YJR017C</b> | 1  | -  | -  |
| 0 | ETR1        | YBR026C        | -  | 1  | 1  |
| 0 | ETT1        | YOR051C        | -  | -1 | -  |
| 0 | EUG1        | YDR518W        | 1  | -  | -  |
| 0 | EXG2        | YDR261C        | -  | 1  | -  |
| 0 | FAA1        | YOR317W        | 1  | 1  | 1  |
| 0 | FAB1        | YFR019W        | 1  | 1  | -  |
| 0 | FAF1        | YIL019W        | -  | -  | -1 |
| 1 | <b>FAL1</b> | <b>YDR021W</b> | -1 | -  | -1 |
| 0 | FAP1        | YNL023C        | -  | -  | -1 |
| 0 | FAP7        | YDL166C        | -  | -  | -1 |
| 0 | FAR1        | YJL157C        | -1 | -1 | -  |
| 0 | FAR3        | YMR052W        | -  | -  | 1  |
| 0 | FAT1        | YBR041W        | -  | -  | 1  |
| 0 | FCY1        | YPR062W        | -  | -  | -1 |
| 0 | FCY21       | YER060W        | -1 | -1 | -  |
| 0 | FCY22       | YER060W-A      | -  | -  | -1 |
| 0 | FEN1        | YCR034W        | -  | -  | -1 |
| 0 | FEN2        | YCR028C        | -  | -1 | -1 |
| 0 | FES1        | YBR101C        | -1 | -  | -  |
| 0 | FET4        | YMR319C        | -1 | -1 | -  |
| 0 | FHN1        | YGR131W        | 1  | -  | -  |
| 0 | FIS1        | YIL065C        | -  | 1  | -  |
| 0 | FIT1        | YDR534C        | 1  | -  | -  |
| 0 | FIT2        | YOR382W        | 1  | 1  | 1  |
| 0 | FIT3        | YOR383C        | 1  | 1  | 1  |
| 0 | FKH2        | YNL068C        | -  | 1  | -  |
| 0 | FKS1        | YLR342W        | 1  | -  | -  |
| 0 | FLC1        | YPL221W        | 1  | 1  | -  |
| 0 | FLC2        | YAL053W        | 1  | 1  | -  |
| 0 | FLD1        | YLR404W        | -1 | -  | -  |
| 0 | FLO1        | YAR050W        | 1  | -  | -  |
| 0 | FLX1        | YIL134W        | -1 | -  | -  |
| 0 | FMN1        | YDR236C        | -  | -  | -1 |
| 0 | FMO1        | YHR176W        | 1  | -  | -  |
| 0 | FMP16       | YDR070C        | -  | 1  | 1  |
| 0 | FMP21       | YBR269C        | -  | 1  | -  |
| 0 | FMP23       | YBR047W        | 1  | 1  | 1  |
| 0 | FMP25       | YLR077W        | -  | 1  | -  |
| 0 | FMP27       | YLR454W        | 1  | -  | -  |
| 0 | FMP33       | YJL161W        | 1  | 1  | 1  |
| 0 | FMP40       | YPL222W        | 1  | 1  | 1  |
| 0 | FMP41       | YNL168C        | 1  | -  | -  |
| 0 | FMP43       | YGR243W        | -  | -  | 1  |
| 0 | FMP45       | YDL222C        | -  | 1  | -  |
| 0 | FMP46       | YKR049C        | -  | 1  | 1  |
| 0 | FMP48       | YGR052W        | 1  | 1  | -  |
| 0 | FMS1        | YMR020W        | 1  | -  | -  |
| 1 | <b>FOB1</b> | <b>YDR110W</b> | -  | -  | -1 |
| 0 | FOL2        | YGR267C        | -  | -1 | -1 |

|               |                |    |    |    |
|---------------|----------------|----|----|----|
| 0 FOL3        | YMR113W        | -  | -  | -1 |
| 0 FPK1        | YNR047W        | -  | 1  | -  |
| 0 FPR3        | YML074C        | -  | -1 | -1 |
| 0 FPR4        | YLR449W        | -1 | -1 | -1 |
| 0 FRA1        | YLL029W        | 1  | -  | -  |
| 0 FRA2        | YGL220W        | -  | -  | -1 |
| 0 FRE1        | YLR214W        | 1  | -1 | -1 |
| 0 FRE3        | YOR381W        | 1  | -  | -  |
| 0 FRE4        | YNR060W        | -  | -  | -1 |
| 0 FRE5        | YOR384W        | 1  | -  | -  |
| 0 FRE6        | YLL051C        | 1  | -1 | -1 |
| 0 FRK1        | YPL141C        | -  | -  | -1 |
| 0 FRS2        | YFL022C        | -1 | -  | -  |
| 0 FRT2        | YAL028W        | 1  | 1  | 1  |
| 0 FSF1        | YOR271C        | -1 | -1 | -1 |
| 0 FSH1        | YHR049W        | -1 | -  | 1  |
| 0 FSH2        | YMR222C        | -1 | -  | -  |
| 0 FSP2        | YIL172C        | 1  | 1  | -1 |
| 0 FSP2        | YJL221C        | 1  | 1  | -1 |
| 0 FSP2        | YOL157C        | 1  | 1  | -1 |
| 0 FTR1        | YER145C        | 1  | -  | -  |
| 0 FUI1        | YBL042C        | -  | -  | -1 |
| 0 FUN14       | YAL008W        | -  | 1  | 1  |
| 0 FUN19       | YAL034C        | 1  | 1  | -  |
| 0 FUR1        | YHR128W        | -1 | -  | -1 |
| 0 FUS1        | YCL027W        | -1 | -1 | -  |
| 0 FUS3        | YBL016W        | -1 | -1 | -  |
| 0 FYV10       | YIL097W        | -  | 1  | 1  |
| 1 <b>FYV4</b> | <b>YHR059W</b> | -  | 1  | 1  |
| 0 FYV5        | YCL058C        | -1 | -  | -  |
| 1 <b>FYV6</b> | <b>YNL133C</b> | -  | -  | 1  |
| 0 FYV8        | YGR196C        | 1  | -  | -  |
| 0 GAA1        | YLR088W        | 1  | -  | -  |
| 0 GAC1        | YOR178C        | -  | 1  | 1  |
| 0 GAD1        | YMR250W        | -  | 1  | 1  |
| 0 GAL3        | YDR009W        | 1  | 1  | 1  |
| 0 GAL80       | YML051W        | -  | -  | 1  |
| 0 GAP1        | YKR039W        | 1  | -  | -1 |
| 0 GAR1        | YHR089C        | -  | -1 | -1 |
| 0 GAS2        | YLR343W        | -  | 1  | 1  |
| 0 GAT1        | YFL021W        | -  | -  | 1  |
| 0 GAT2        | YMR136W        | -1 | 1  | 1  |
| 0 GCD10       | YNL062C        | -1 | -  | -1 |
| 0 GCD11       | YER025W        | -1 | -1 | -1 |
| 0 GCD14       | YJL125C        | -1 | -  | -1 |
| 0 GCD2        | YGR083C        | -  | -  | -1 |
| 0 GCD7        | YLR291C        | -1 | -  | -1 |
| 0 GCN3        | YKR026C        | -1 | -1 | -1 |
| 0 GCR1        | YPL075W        | 1  | -  | -  |
| 0 GCV1        | YDR019C        | 1  | 1  | 1  |

|   |             |                |    |    |    |
|---|-------------|----------------|----|----|----|
| 0 | GCV2        | YMR189W        | 1  | 1  | 1  |
| 1 | <b>GCV3</b> | <b>YAL044C</b> | 1  | 1  | 1  |
| 0 | GCY1        | YOR120W        | 1  | 1  | 1  |
| 0 | GDB1        | YPR184W        | 1  | 1  | 1  |
| 0 | GDE1        | YPL110C        | 1  | -  | -  |
| 0 | GDH1        | YOR375C        | 1  | -1 | -1 |
| 0 | GDH2        | YDL215C        | 1  | 1  | 1  |
| 0 | GDH3        | YAL062W        | 1  | 1  | -  |
| 0 | GDT1        | YBR187W        | -1 | -  | -  |
| 0 | GEA2        | YEL022W        | 1  | -  | -  |
| 0 | GEP4        | YHR100C        | -1 | -1 | -1 |
| 0 | GEP7        | YGL057C        | -1 | -  | -  |
| 0 | GET1        | YGL020C        | -  | -1 | -  |
| 0 | GFA1        | YKL104C        | 1  | -  | -  |
| 0 | GFD1        | YMR255W        | -  | -1 | -  |
| 0 | GFD2        | YCL036W        | -1 | -  | -1 |
| 0 | GGA1        | YDR358W        | 1  | -  | -  |
| 0 | GGC1        | YDL198C        | -  | -1 | 1  |
| 0 | GIC2        | YDR309C        | -  | -  | 1  |
| 0 | GID7        | YCL039W        | 1  | -  | 1  |
| 0 | GID8        | YMR135C        | 1  | 1  | 1  |
| 0 | GIP2        | YER054C        | 1  | 1  | 1  |
| 0 | GIP3        | YPL137C        | -  | 1  | -  |
| 0 | GIP4        | YAL031C        | -  | -  | 1  |
| 0 | GIR2        | YDR152W        | -  | -1 | -  |
| 0 | GIS1        | YDR096W        | -  | -  | 1  |
| 0 | GIS2        | YNL255C        | -  | -1 | -  |
| 0 | GLC3        | YEL011W        | 1  | 1  | 1  |
| 0 | GLC7        | YER133W        | -  | -1 | -  |
| 0 | GLC8        | YMR311C        | -  | -  | 1  |
| 0 | GLE2        | YER107C        | -1 | -1 | -1 |
| 0 | GLG1        | YKR058W        | -  | -  | 1  |
| 0 | GLG2        | YJL137C        | -1 | -  | -  |
| 0 | GLK1        | YCL040W        | 1  | 1  | 1  |
| 0 | GLN1        | YPR035W        | 1  | -  | 1  |
| 1 | <b>GLO4</b> | <b>YOR040W</b> | 1  | -  | -  |
| 0 | GLR1        | YPL091W        | -1 | -  | -  |
| 0 | GLT1        | YDL171C        | -  | -  | -1 |
| 0 | GLY1        | YEL046C        | -1 | -1 | -1 |
| 0 | GMC1        | YDR506C        | 1  | -  | 1  |
| 0 | GMH1        | YKR030W        | -  | -1 | -  |
| 0 | GND2        | YGR256W        | 1  | 1  | 1  |
| 0 | GNP1        | YDR508C        | -  | -  | -1 |
| 1 | <b>GON7</b> | <b>YJL184W</b> | -  | -  | -1 |
| 0 | GOR1        | YNL274C        | 1  | 1  | 1  |
| 0 | GOT1        | YMR292W        | -  | -1 | -  |
| 0 | GPA1        | YHR005C        | -1 | -1 | -1 |
| 0 | GPA2        | YER020W        | 1  | -  | 1  |
| 0 | GPD1        | YDL022W        | -1 | 1  | -  |
| 0 | GPD2        | YOL059W        | -  | -  | -1 |



|               |                |    |    |    |
|---------------|----------------|----|----|----|
| 0 GPG1        | YGL121C        | 1  | 1  | 1  |
| 0 GPH1        | YPR160W        | 1  | 1  | 1  |
| 0 GPI11       | YDR302W        | -1 | -  | -  |
| 0 GPI15       | YNL038W        | -1 | -1 | -  |
| 0 GPI18       | YBR004C        | 1  | -  | -1 |
| 0 GPI2        | YPL076W        | -1 | -  | -  |
| 0 GPM2        | YDL021W        | 1  | 1  | 1  |
| 0 GPM3        | YOL056W        | -  | -1 | -1 |
| 0 GPR1        | YDL035C        | 1  | 1  | 1  |
| 0 GPT2        | YKR067W        | 1  | 1  | 1  |
| 0 GPX2        | YBR244W        | -  | -1 | -1 |
| 0 GRC3        | YLL035W        | -  | -  | -1 |
| 0 GRE2        | YOL151W        | -1 | 1  | -  |
| 0 GRE3        | YHR104W        | -  | 1  | 1  |
| 0 GRR1        | YJR090C        | -  | 1  | -  |
| 0 GRS2        | YPR081C        | 1  | -  | -  |
| 0 GRX1        | YCL035C        | 1  | 1  | 1  |
| 0 GRX2        | YDR513W        | -  | 1  | 1  |
| 0 GRX4        | YER174C        | -1 | -1 | -1 |
| 0 GRX6        | YDL010W        | 1  | -1 | 1  |
| 0 GRX8        | YLR364W        | -1 | 1  | -  |
| 0 GSC2        | YGR032W        | 1  | 1  | 1  |
| 0 GSP2        | YOR185C        | 1  | 1  | 1  |
| 0 GSY1        | YFR015C        | -  | -  | 1  |
| 0 GSY2        | YLR258W        | -  | 1  | 1  |
| 0 GTB1        | YDR221W        | 1  | -  | -1 |
| 0 GTF1        | YGR102C        | -  | 1  | 1  |
| 0 GTO1        | YGR154C        | -  | -  | -1 |
| 0 GTO3        | YMR251W        | 1  | -  | -  |
| <b>1 GTR2</b> | <b>YGR163W</b> | -  | -1 | -  |
| 0 GTS1        | YGL181W        | -  | -1 | -  |
| 0 GTT1        | YIR038C        | 1  | -  | -  |
| 0 GTT2        | YLL060C        | 1  | -  | 1  |
| 0 GUA1        | YMR217W        | -  | -  | -1 |
| 0 GUD1        | YDL238C        | -  | 1  | -  |
| 0 GUF1        | YLR289W        | -  | 1  | -  |
| 0 GUT1        | YHL032C        | -  | -  | 1  |
| 0 GUT2        | YIL155C        | 1  | -  | 1  |
| 0 GWT1        | YJL091C        | -  | -  | 1  |
| 0 GYL1        | YMR192W        | 1  | -  | -  |
| 0 GYP5        | YPL249C        | -  | 1  | -  |
| 0 GYP7        | YDL234C        | 1  | 1  | 1  |
| 0 GYP8        | YFL027C        | -  | -1 | -  |
| 0 HAA1        | YPR008W        | -  | 1  | 1  |
| 0 HAL1        | YPR005C        | 1  | 1  | -  |
| 0 HAM1        | YJR069C        | -  | -  | -1 |
| 0 HAP1        | YLR256W        | 1  | -  | 1  |
| 0 HAP3        | YBL021C        | -1 | -1 | -  |
| 0 HAP4        | YKL109W        | -1 | -  | 1  |
| 0 HAP5        | YOR358W        | 1  | 1  | -  |

|               |                |    |    |    |
|---------------|----------------|----|----|----|
| 0 HAS1        | YMR290C        | -  | -  | -1 |
| 0 HAT1        | YPL001W        | -  | -1 | -1 |
| 0 HBN1        | YCL026C-B      | 1  | 1  | 1  |
| 0 HBS1        | YKR084C        | 1  | -  | -  |
| 0 HBT1        | YDL223C        | 1  | 1  | -  |
| 0 HCA4        | YJL033W        | -  | -  | -1 |
| 1 <b>HCH1</b> | <b>YNL281W</b> | -  | 1  | -  |
| 1 <b>HCR1</b> | <b>YLR192C</b> | -  | -1 | -  |
| 1 <b>HEK2</b> | <b>YBL032W</b> | -  | -1 | -  |
| 0 HEM12       | YDR047W        | -  | -1 | -  |
| 0 HEM13       | YDR044W        | 1  | -  | -  |
| 0 HEM14       | YER014W        | 1  | -  | -  |
| 0 HEM3        | YDL205C        | -1 | -  | -  |
| 0 HER1        | YOR227W        | 1  | 1  | 1  |
| 0 HES1        | YOR237W        | 1  | -  | -  |
| 0 HFA1        | YMR207C        | 1  | -  | -  |
| 1 <b>HFI1</b> | <b>YPL254W</b> | -1 | -1 | -  |
| 0 HFM1        | YGL251C        | -  | -  | -1 |
| 0 HGH1        | YGR187C        | -1 | -  | -1 |
| 0 HHO1        | YPL127C        | -1 | -1 | -  |
| 0 HIM1        | YDR317W        | -  | 1  | -  |
| 0 HIR1        | YBL008W        | -  | 1  | -  |
| 0 HIR2        | YOR038C        | -1 | -  | -  |
| 0 HIS1        | YER055C        | -  | -1 | -1 |
| 0 HIS3        | YOR202W        | 1  | 1  | -  |
| 0 HIS4        | YCL030C        | 1  | -1 | -1 |
| 0 HIS5        | YIL116W        | 1  | -  | -  |
| 0 HIS6        | YIL020C        | -1 | -  | -1 |
| 0 HIS7        | YBR248C        | 1  | -  | -1 |
| 1 <b>HIT1</b> | <b>YJR055W</b> | -1 | -  | -  |
| 0 HLJ1        | YMR161W        | -1 | -1 | -  |
| 0 HMF1        | YER057C        | -  | -1 | 1  |
| 0 HMG1        | YML075C        | 1  | -  | -1 |
| 0 HMI1        | YOL095C        | -1 | -  | -1 |
| 1 <b>HMO1</b> | <b>YDR174W</b> | -1 | -  | -  |
| 0 HMS1        | YOR032C        | -  | -  | 1  |
| 0 HMS2        | YJR147W        | -1 | -  | -1 |
| 0 HMT1        | YBR034C        | -1 | -  | -1 |
| 0 HMX1        | YLR205C        | 1  | -  | -  |
| 0 HNM1        | YGL077C        | -1 | -  | -  |
| 0 HNT2        | YDR305C        | -  | -1 | -  |
| 0 HO          | YDL227C        | -1 | -1 | -  |
| 0 HOM2        | YDR158W        | -1 | -  | -  |
| 0 HOP1        | YIL072W        | -  | -1 | -1 |
| 0 HOR2        | YER062C        | -  | 1  | 1  |
| 0 HOR7        | YMR251W-A      | 1  | 1  | 1  |
| 0 HOS3        | YPL116W        | -  | -  | 1  |
| 0 HOT1        | YMR172W        | 1  | -  | -  |
| 0 HOT13       | YKL084W        | 1  | -  | -1 |
| 0 HPA3        | YEL066W        | 1  | 1  | -  |

|                 |                  |    |    |    |
|-----------------|------------------|----|----|----|
| 0 HPF1          | YOL155C          | -1 | 1  | -1 |
| 0 HPM1          | YIL110W          | -  | -1 | -1 |
| 0 HPT1          | YDR399W          | -1 | -  | -1 |
| 0 HRB1          | YNL004W          | -  | -1 | -  |
| 0 HRI1          | YLR301W          | 1  | -  | -  |
| 0 HRP1          | YOL123W          | -  | -1 | -1 |
| 1 <b>HRT1</b>   | <b>YOL133W</b>   | -1 | -  | -  |
| 0 HSH155        | YMR288W          | -1 | -  | -1 |
| 0 HSK3          | YKL138C-A        | 1  | -  | -  |
| 0 HSP10         | YOR020C          | -  | 1  | -  |
| 1 <b>HSP104</b> | <b>YLL026W</b>   | 1  | 1  | 1  |
| 0 HSP12         | YFL014W          | -  | 1  | 1  |
| 0 HSP150        | YJL159W          | 1  | 1  | -  |
| 0 HSP26         | YBR072W          | 1  | 1  | 1  |
| 0 HSP30         | YCR021C          | -  | 1  | 1  |
| 0 HSP31         | YDR533C          | 1  | 1  | 1  |
| 0 HSP42         | YDR171W          | -  | 1  | 1  |
| 0 HSP60         | YLR259C          | -  | 1  | -  |
| 0 HSP78         | YDR258C          | 1  | 1  | 1  |
| 1 <b>HSP82</b>  | <b>YPL240C</b>   | -  | 1  | 1  |
| 1 <b>HST1</b>   | <b>YOL068C</b>   | -1 | -  | -  |
| 0 HST4          | YDR191W          | -1 | -  | -  |
| 0 HTA2          | YBL003C          | -1 | -  | -  |
| 0 HTB2          | YBL002W          | -1 | -  | -  |
| 1 <b>HTL1</b>   | <b>YCR020W-B</b> | -1 | -  | -  |
| 0 HTS1          | YPR033C          | -  | -  | -1 |
| 0 HTZ1          | YOL012C          | -  | -1 | -  |
| 0 HUG1          | YML058W-A        | 1  | 1  | -  |
| 0 HUT1          | YPL244C          | -1 | -  | -  |
| 0 HXK1          | YFR053C          | -  | 1  | 1  |
| 0 HXT1          | YHR094C          | -1 | -  | -1 |
| 0 HXT11         | YOL156W          | 1  | -  | -  |
| 0 HXT2          | YMR011W          | -  | -1 | -1 |
| 0 HXT3          | YDR345C          | 1  | -  | -  |
| 0 HXT4          | YHR092C          | -1 | -  | 1  |
| 0 HXT6          | YDR343C          | -1 | 1  | 1  |
| 0 HXT7          | YDR342C          | -1 | 1  | 1  |
| 0 HYM1          | YKL189W          | -1 | -  | 1  |
| 0 HYR1          | YIR037W          | -  | -  | 1  |
| 0 IAH1          | YOR126C          | 1  | -  | -  |
| 0 IBD2          | YNL164C          | -  | -  | -1 |
| 0 ICL1          | YER065C          | -  | -  | 1  |
| 0 ICL2          | YPR006C          | 1  | 1  | -  |
| 0 ICP55         | YER078C          | -1 | -1 | 1  |
| 0 ICS2          | YBR157C          | 1  | -  | 1  |
| 0 ICS3          | YJL077C          | 1  | -  | -  |
| 0 ICT1          | YLR099C          | -1 | 1  | -  |
| 0 ICY1          | YMR195W          | 1  | 1  | 1  |
| 0 ICY2          | YPL250C          | -  | -  | 1  |
| 0 IDH1          | YNL037C          | 1  | 1  | 1  |

|                |                |    |    |    |
|----------------|----------------|----|----|----|
| 0 IDH2         | YOR136W        | 1  | 1  | 1  |
| 0 IDP1         | YDL066W        | 1  | -  | -  |
| 0 IDP2         | YLR174W        | -  | 1  | -  |
| 0 IDP3         | YNL009W        | 1  | -  | -  |
| 0 IES2         | YNL215W        | -  | -  | -1 |
| 0 IES4         | YOR189W        | -  | -1 | 1  |
| 0 IES5         | YER092W        | 1  | -  | -  |
| <b>1 IES6</b>  | <b>YEL044W</b> | -  | -  | -1 |
| 0 IFM1         | YOL023W        | 1  | 1  | 1  |
| 0 IGD1         | YFR017C        | 1  | 1  | 1  |
| 0 IKI1         | YHR187W        | -1 | -  | -1 |
| 0 IKI3         | YLR384C        | -  | -  | -1 |
| 0 IKS1         | YJL057C        | -  | 1  | 1  |
| 0 ILM1         | YJR118C        | -  | -1 | -  |
| 0 ILV2         | YMR108W        | -  | -1 | -  |
| 0 ILV3         | YJR016C        | -1 | -1 | -  |
| <b>1 ILV5</b>  | <b>YLR355C</b> | -1 | -1 | -  |
| 0 IMA1         | YGR287C        | -  | 1  | -1 |
| 0 IMD1         | YAR073W        | -1 | -1 | -  |
| 0 IMD2         | YAR075W        | -  | -  | -1 |
| 0 IMD2         | YHR216W        | -1 | -1 | -1 |
| 0 IMD3         | YHR216W        | -1 | -1 | -1 |
| 0 IMD3         | YLR432W        | -1 | -  | -1 |
| 0 IMD4         | YML056C        | -1 | -  | -1 |
| 0 IMG1         | YCR046C        | -  | 1  | -  |
| <b>1 IMG2</b>  | <b>YCR071C</b> | -  | 1  | 1  |
| 0 IML2         | YJL082W        | 1  | 1  | -  |
| 0 IMP3         | YHR148W        | -1 | -  | -1 |
| 0 IMP4         | YNL075W        | -1 | -  | -1 |
| 0 INH1         | YDL181W        | -  | 1  | 1  |
| 0 INO1         | YJL153C        | 1  | 1  | 1  |
| 0 INO2         | YDR123C        | -  | -  | -1 |
| 0 INP1         | YMR204C        | -  | -1 | -  |
| 0 INP2         | YMR163C        | -1 | -  | -  |
| 0 INP53        | YOR109W        | -1 | -  | -  |
| 0 IPI1         | YHR085W        | -1 | -  | -1 |
| 0 IPI3         | YNL182C        | -1 | -  | -1 |
| <b>1 IPK1</b>  | <b>YDR315C</b> | 1  | -  | -  |
| 0 IPL1         | YPL209C        | -1 | -  | -  |
| 0 IPT1         | YDR072C        | -1 | -1 | -1 |
| 0 IRA1         | YBR140C        | 1  | 1  | -  |
| 0 IRC10        | YOL015W        | 1  | -  | -  |
| <b>1 IRC15</b> | <b>YPL017C</b> | 1  | 1  | 1  |
| 0 IRC18        | YJL037W        | 1  | 1  | 1  |
| 0 IRC23        | YOR044W        | -  | -  | 1  |
| 0 IRC25        | YLR021W        | -  | 1  | -  |
| 0 IRC7         | YFR055W        | -  | -1 | -1 |
| 0 IRR1         | YIL026C        | 1  | -  | -  |
| 0 ISC10        | YER180C        | -  | -1 | -  |
| 0 ISM1         | YPL040C        | -  | -  | 1  |

|                |                |    |    |    |
|----------------|----------------|----|----|----|
| 0 ISN1         | YOR155C        | -  | -  | 1  |
| 0 ISU1         | YPL135W        | -  | 1  | -  |
| 0 ISU2         | YOR226C        | -1 | -1 | 1  |
| 0 ITC1         | YGL133W        | -  | 1  | -  |
| 0 IZH1         | YDR492W        | -1 | -  | -1 |
| 0 IZH2         | YOL002C        | -1 | -1 | -1 |
| 0 IZH3         | YLR023C        | 1  | -  | -  |
| 0 JAC1         | YGL018C        | 1  | 1  | -  |
| 0 JHD2         | YJR119C        | -  | -  | 1  |
| 0 JID1         | YPR061C        | -  | 1  | 1  |
| 0 JIP4         | YDR475C        | -  | 1  | 1  |
| 0 JIP5         | YPR169W        | -  | -1 | -1 |
| 0 JJJ3         | YJR097W        | -  | -  | -1 |
| 0 JSN1         | YJR091C        | 1  | 1  | 1  |
| 0 KAP104       | YBR017C        | -  | 1  | -  |
| 0 KAP122       | YGL016W        | -1 | -  | -  |
| 0 KAP123       | YER110C        | -  | -  | -1 |
| 0 KAP95        | YLR347C        | -1 | 1  | -  |
| 0 KAR2         | YJL034W        | -  | 1  | -  |
| 0 KAR4         | YCL055W        | -1 | -1 | -  |
| 0 KAR5         | YMR065W        | -1 | -1 | -  |
| 0 KAR9         | YPL269W        | -1 | -  | -  |
| 1 <b>KCS1</b>  | <b>YDR017C</b> | -1 | -  | -  |
| 0 KDX1         | YKL161C        | 1  | -  | -  |
| 0 KEG1         | YFR042W        | -1 | 1  | -  |
| 0 KEI1         | YDR367W        | -  | -  | -1 |
| 0 KEL1         | YHR158C        | 1  | -  | -  |
| 0 KEL2         | YGR238C        | 1  | 1  | 1  |
| 0 KEL3         | YPL263C        | -  | -  | -1 |
| 0 KES1         | YPL145C        | -  | -  | -1 |
| 0 KEX2         | YNL238W        | -1 | -  | -  |
| 0 KGD1         | YIL125W        | -  | -  | 1  |
| 0 KIC1         | YHR102W        | -  | 1  | -  |
| 0 KIN1         | YDR122W        | -  | 1  | 1  |
| 0 KIN28        | YDL108W        | -1 | -  | -  |
| 0 KIN3         | YAR018C        | -  | -1 | -  |
| 0 KIN82        | YCR091W        | 1  | 1  | 1  |
| 0 KIP1         | YBL063W        | 1  | -  | 1  |
| 0 KIP3         | YGL216W        | -1 | -  | -  |
| 0 KNH1         | YDL049C        | 1  | 1  | 1  |
| 0 KNS1         | YLL019C        | 1  | 1  | 1  |
| 0 KRE1         | YNL322C        | -  | 1  | 1  |
| 0 KRE27        | YIL027C        | -1 | -  | -  |
| 1 <b>KRE33</b> | <b>YNL132W</b> | -  | -  | -1 |
| 0 KRE6         | YPR159W        | 1  | -  | 1  |
| 0 KRE9         | YJL174W        | 1  | -  | -  |
| 0 KRR1         | YCL059C        | -1 | -1 | -1 |
| 1 <b>KRS1</b>  | <b>YDR037W</b> | -  | -1 | -1 |
| 0 KSP1         | YHR082C        | 1  | 1  | 1  |
| 0 KSS1         | YGR040W        | -1 | -  | -  |

|               |                |    |    |    |
|---------------|----------------|----|----|----|
| 0 KTI11       | YBL071W-A      | -  | 1  | -1 |
| 0 KTI12       | YKL110C        | -  | -1 | -1 |
| 0 KTR2        | YKR061W        | 1  | -  | 1  |
| 0 KTR4        | YBR199W        | 1  | -  | -  |
| 0 KTR6        | YPL053C        | -  | -  | -1 |
| 0 KTR7        | YIL085C        | -1 | -1 | -  |
| 0 LAA1        | YJL207C        | -1 | -  | -  |
| 0 LAG1        | YHL003C        | -1 | -  | -  |
| 0 LAP2        | YNL045W        | 1  | -  | -  |
| 0 LAP3        | YNL239W        | 1  | -  | 1  |
| 0 LAP4        | YKL103C        | 1  | 1  | 1  |
| 0 LCB2        | YDR062W        | -  | -1 | -  |
| 0 LCB3        | YJL134W        | -1 | -  | 1  |
| 0 LCB5        | YLR260W        | 1  | -  | -  |
| 0 LCL1        | YPL056C        | -  | -  | -1 |
| 0 LCL3        | YGL085W        | -1 | -  | -  |
| 0 LCP5        | YER127W        | -  | -  | -1 |
| 1 <b>LDB7</b> | <b>YBL006C</b> | -1 | -  | -  |
| 0 LDH1        | YBR204C        | 1  | -  | 1  |
| 0 LEM3        | YNL323W        | -1 | -  | -  |
| 1 <b>LEO1</b> | <b>YOR123C</b> | -  | -1 | -  |
| 0 LEU1        | YGL009C        | -1 | -1 | -  |
| 0 LEU4        | YNL104C        | -  | -  | 1  |
| 0 LEU5        | YHR002W        | -1 | -  | -  |
| 0 LEU9        | YOR108W        | -1 | -1 | -1 |
| 0 LHP1        | YDL051W        | -1 | -  | -1 |
| 0 LIA1        | YJR070C        | -1 | -  | -1 |
| 0 LIP5        | YOR196C        | -1 | -1 | -1 |
| 0 LOC1        | YFR001W        | -  | -  | -1 |
| 0 LOH1        | YJL038C        | 1  | 1  | 1  |
| 0 LOT5        | YKL183W        | -  | -1 | -  |
| 0 LPE10       | YPL060W        | -  | -  | 1  |
| 0 LPP1        | YDR503C        | -1 | -  | -  |
| 0 LRG1        | YDL240W        | -1 | -1 | -  |
| 0 LRO1        | YNR008W        | 1  | -  | -  |
| 1 <b>LRP1</b> | <b>YHR081W</b> | -  | -1 | -1 |
| 0 LSB3        | YFR024C-A      | 1  | -  | -  |
| 0 LSC2        | YGR244C        | -  | 1  | 1  |
| 1 <b>LSG1</b> | <b>YGL099W</b> | -1 | -  | -1 |
| 0 LSM1        | YJL124C        | -  | -1 | -  |
| 0 LSM12       | YHR121W        | -  | -1 | -  |
| 0 LSM2        | YBL026W        | -1 | -  | -  |
| 0 LSP1        | YPL004C        | -  | -  | 1  |
| 1 <b>LST7</b> | <b>YGR057C</b> | -  | -  | -1 |
| 0 LTV1        | YKL143W        | -  | -1 | -1 |
| 0 LUC7        | YDL087C        | -1 | -  | -1 |
| 0 LYS1        | YIR034C        | 1  | 1  | -  |
| 0 LYS2        | YBR115C        | 1  | -  | -  |
| 0 LYS20       | YDL182W        | -  | -  | -1 |
| 0 LYS21       | YDL131W        | -  | 1  | -  |

|                |                |    |    |    |
|----------------|----------------|----|----|----|
| 0 LYS4         | YDR234W        | -1 | -  | -1 |
| 0 LYS9         | YNR050C        | -  | -1 | -  |
| 0 MAD3         | YJL013C        | 1  | -  | -  |
| 0 MAG1         | YER142C        | -  | -  | 1  |
| 1 <b>MAK10</b> | <b>YEL053C</b> | -  | -1 | -  |
| 0 MAK11        | YKL021C        | -1 | -1 | -1 |
| 0 MAK16        | YAL025C        | -  | -  | -1 |
| 1 <b>MAK21</b> | <b>YDR060W</b> | -  | -  | -1 |
| 1 <b>MAK3</b>  | <b>YPR051W</b> | -  | -1 | -  |
| 0 MAK32        | YCR019W        | -1 | -  | -  |
| 0 MAK5         | YBR142W        | -  | -  | -1 |
| 0 MAL12        | YGR292W        | -  | -  | -1 |
| 0 MAL32        | YBR299W        | -  | -  | -1 |
| 0 MAL33        | YBR297W        | 1  | -1 | 1  |
| 0 MAM33        | YIL070C        | -  | 1  | 1  |
| 0 MAP1         | YLR244C        | -1 | -  | -  |
| 0 MBA1         | YBR185C        | -  | 1  | -  |
| 0 MBR1         | YKL093W        | -1 | -  | -  |
| 0 MCA1         | YOR197W        | -  | -  | -1 |
| 0 MCH1         | YDL054C        | 1  | -  | -  |
| 0 MCH4         | YOL119C        | 1  | -  | -  |
| 0 MCH5         | YOR306C        | 1  | -  | -1 |
| 0 MCK1         | YNL307C        | -  | -1 | -  |
| 0 MCM1         | YMR043W        | -1 | -  | -  |
| 0 MCM10        | YIL150C        | -  | -  | -1 |
| 0 MCM21        | YDR318W        | -1 | -  | -  |
| 0 MCM22        | YJR135C        | -  | -  | -1 |
| 1 <b>MCM3</b>  | <b>YEL032W</b> | -1 | -  | -  |
| 1 <b>MCM6</b>  | <b>YGL201C</b> | -  | -  | -1 |
| 0 MCR1         | YKL150W        | -  | 1  | 1  |
| 0 MCT1         | YOR221C        | 1  | -  | 1  |
| 0 MCX1         | YBR227C        | 1  | -1 | -1 |
| 0 MDE1         | YJR024C        | -1 | -  | -1 |
| 0 MDG1         | YNL173C        | -  | 1  | 1  |
| 0 MDH1         | YKL085W        | -  | -  | 1  |
| 0 MDJ1         | YFL016C        | -  | 1  | 1  |
| 0 MDL1         | YLR188W        | -  | -  | -1 |
| 1 <b>MDM10</b> | <b>YAL010C</b> | 1  | -  | -  |
| 0 MDM12        | YOL009C        | -  | -  | 1  |
| 0 MDM30        | YLR368W        | -  | 1  | -  |
| 0 MDM31        | YHR194W        | -  | -  | 1  |
| 0 MDM34        | YGL219C        | 1  | -  | 1  |
| 0 MDM35        | YKL053C-A      | 1  | 1  | 1  |
| 0 MDS3         | YGL197W        | 1  | -  | -  |
| 0 MED2         | YDL005C        | -  | -1 | -  |
| 0 MED4         | YOR174W        | -1 | -  | -  |
| 0 MED6         | YHR058C        | -1 | -  | -  |
| 0 MEF1         | YLR069C        | -  | 1  | 1  |
| 0 MEF2         | YJL102W        | -  | -  | 1  |
| 0 MEH1         | YKR007W        | -  | -1 | -  |

|                |                |    |    |    |
|----------------|----------------|----|----|----|
| 0 MEI4         | YER044C-A      | 1  | 1  | -  |
| 0 MEP1         | YGR121C        | 1  | 1  | -1 |
| 0 MEP2         | YNL142W        | 1  | -  | -  |
| 0 MET1         | YKR069W        | -  | -  | -1 |
| 0 MET10        | YFR030W        | -  | -  | -1 |
| 0 MET14        | YKL001C        | -  | -  | -1 |
| 0 MET2         | YNL277W        | -1 | -  | -  |
| 0 MET22        | YOL064C        | -1 | -1 | -  |
| 0 MET28        | YIR017C        | 1  | -  | -  |
| 0 MET3         | YJR010W        | -  | -  | -1 |
| 0 MET31        | YPL038W        | -1 | -1 | -  |
| 0 MET32        | YDR253C        | -1 | -  | -  |
| 1 <b>MET7</b>  | <b>YOR241W</b> | -1 | -1 | -1 |
| 0 MEU1         | YLR017W        | -1 | -  | -1 |
| 0 MF(ALPHA)2   | YGL089C        | -1 | -  | -  |
| 0 MFA1         | YDR461W        | -1 | -1 | -  |
| 0 MFA2         | YNL145W        | -1 | -1 | -  |
| 0 MFB1         | YDR219C        | -  | -  | 1  |
| 0 MGM101       | YJR144W        | -1 | -  | -  |
| 0 MGR2         | YPL098C        | -  | 1  | -  |
| 0 MGT1         | YDL200C        | 1  | -  | -  |
| 0 MHO1         | YJR008W        | 1  | 1  | 1  |
| 0 MHP1         | YJL042W        | -  | 1  | 1  |
| 0 MHR1         | YDR296W        | -  | 1  | 1  |
| 0 MHT1         | YLL062C        | -1 | -1 | -1 |
| 0 MIA40        | YKL195W        | -  | -  | 1  |
| 0 MIC14        | YDR031W        | -  | 1  | 1  |
| 0 MIC17        | YMR002W        | -1 | 1  | -  |
| 0 MIG2         | YGL209W        | -  | -  | -1 |
| 0 MIG3         | YER028C        | -  | -  | -1 |
| 0 MIH1         | YMR036C        | -1 | -  | -  |
| 0 MIM1         | YOL026C        | 1  | -  | -  |
| 0 MIM2         | YLR099W-A      | -  | 1  | -  |
| 0 MIP6         | YHR015W        | 1  | 1  | -  |
| 0 MIR1         | YJR077C        | -1 | -  | 1  |
| 0 MKC7         | YDR144C        | -  | -  | -1 |
| 0 MKK2         | YPL140C        | -  | -  | 1  |
| 0 MLC2         | YPR188C        | -  | 1  | -  |
| 0 MLF3         | YNL074C        | 1  | 1  | -  |
| 0 MLH3         | YPL164C        | 1  | 1  | -  |
| 0 MLS1         | YNL117W        | -  | -  | 1  |
| 1 <b>MMM1</b>  | <b>YLL006W</b> | -  | -1 | -1 |
| 0 MMP1         | YLL061W        | -1 | -1 | -1 |
| 0 MMS1         | YPR164W        | -  | -  | -1 |
| 0 MMS2         | YGL087C        | -  | 1  | 1  |
| 1 <b>MMS21</b> | <b>YEL019C</b> | -  | 1  | -  |
| 0 MMT1         | YMR177W        | -  | -1 | -  |
| 0 MMT2         | YPL224C        | 1  | -  | -  |
| 0 MND2         | YIR025W        | -  | -  | -1 |
| 0 MNL1         | YHR204W        | -  | -  | -1 |



|               |                |    |    |    |
|---------------|----------------|----|----|----|
| 0 MNN1        | YER001W        | -1 | -  | -  |
| 0 MNN10       | YDR245W        | -1 | -1 | -1 |
| 0 MNN11       | YJL183W        | -  | -  | -1 |
| 0 MNN4        | YKL201C        | 1  | -  | -  |
| 0 MNN5        | YJL186W        | -1 | -  | -  |
| 0 MNP1        | YGL068W        | -  | 1  | -  |
| 0 MNS1        | YJR131W        | -  | -  | -1 |
| 0 MNT2        | YGL257C        | -  | -1 | -1 |
| 0 MNT3        | YIL014W        | -  | -  | 1  |
| 0 MOB2        | YFL034C-B      | -1 | -  | -  |
| 0 MOG1        | YJR074W        | 1  | 1  | 1  |
| 0 MON1        | YGL124C        | -  | -  | -1 |
| 0 MON2        | YNL297C        | 1  | 1  | -  |
| 0 MOS1        | YCL057C-A      | -  | 1  | 1  |
| 0 MOT1        | YPL082C        | -1 | 1  | -  |
| 0 MPC54       | YOR177C        | 1  | 1  | -  |
| 0 MPD1        | YOR288C        | -  | -  | 1  |
| 0 MPE1        | YKL059C        | -  | -  | 1  |
| 0 MPH1        | YIR002C        | -  | 1  | -  |
| 0 MPM1        | YJL066C        | 1  | 1  | 1  |
| 0 MPP10       | YJR002W        | -  | -  | -1 |
| 0 MPT5        | YGL178W        | -  | 1  | -  |
| 1 <b>MRC1</b> | <b>YCL061C</b> | 1  | -  | -  |
| 0 MRH4        | YGL064C        | -  | 1  | -  |
| 0 MRI1        | YPR118W        | -1 | -1 | -1 |
| 0 MRK1        | YDL079C        | -  | 1  | 1  |
| 0 MRM1        | YOR201C        | -  | 1  | -  |
| 0 MRN1        | YPL184C        | -  | -1 | 1  |
| 0 MRP1        | YDR347W        | -  | 1  | -  |
| 0 MRP10       | YDL045W-A      | -  | 1  | 1  |
| 0 MRP13       | YGR084C        | -  | -  | 1  |
| 0 MRP17       | YKL003C        | -  | 1  | -  |
| 0 MRP20       | YDR405W        | -  | -  | 1  |
| 0 MRP21       | YBL090W        | -1 | -  | -  |
| 0 MRP4        | YHL004W        | -  | -  | 1  |
| 0 MRP49       | YKL167C        | -  | 1  | 1  |
| 0 MRP51       | YPL118W        | -  | -  | 1  |
| 0 MRP7        | YNL005C        | -  | -  | 1  |
| 0 MRP8        | YKL142W        | -  | 1  | 1  |
| 0 MRPL1       | YDR116C        | -  | -  | 1  |
| 0 MRPL10      | YNL284C        | -1 | -  | -  |
| 0 MRPL11      | YDL202W        | -  | -  | 1  |
| 0 MRPL13      | YKR006C        | -  | 1  | 1  |
| 0 MRPL15      | YLR312W-A      | -  | 1  | -  |
| 0 MRPL16      | YBL038W        | -  | -  | 1  |
| 0 MRPL17      | YNL252C        | -1 | -  | 1  |
| 0 MRPL19      | YNL185C        | -  | 1  | 1  |
| 0 MRPL20      | YKR085C        | -1 | 1  | -  |
| 0 MRPL22      | YNL177C        | -  | -  | 1  |
| 0 MRPL23      | YOR150W        | -  | 1  | 1  |

|   |               |                |    |    |    |
|---|---------------|----------------|----|----|----|
| 0 | MRPL24        | YMR193W        | -  | -  | 1  |
| 1 | <b>MRPL3</b>  | <b>YMR024W</b> | -  | -  | 1  |
| 0 | MRPL32        | YCR003W        | -  | -  | 1  |
| 0 | MRPL33        | YMR286W        | -  | 1  | -  |
| 0 | MRPL36        | YBR122C        | -  | 1  | 1  |
| 0 | MRPL37        | YBR268W        | -  | -  | 1  |
| 1 | <b>MRPL38</b> | <b>YKL170W</b> | -  | -  | 1  |
| 0 | MRPL39        | YML009C        | -  | 1  | 1  |
| 0 | MRPL4         | YLR439W        | -  | 1  | -  |
| 0 | MRPL40        | YPL173W        | -  | 1  | 1  |
| 1 | <b>MRPL44</b> | <b>YMR225C</b> | -  | 1  | 1  |
| 0 | MRPL50        | YNR022C        | -  | 1  | -  |
| 0 | MRPL6         | YHR147C        | -  | 1  | 1  |
| 0 | MRPL9         | YGR220C        | -  | 1  | 1  |
| 0 | MRPS17        | YMR188C        | -  | -  | 1  |
| 1 | <b>MRPS18</b> | <b>YNL306W</b> | -  | 1  | -  |
| 0 | MRPS28        | YDR337W        | -  | -  | 1  |
| 0 | MRPS5         | YBR251W        | -  | -  | 1  |
| 0 | MRPS8         | YMR158W        | -  | 1  | -  |
| 0 | MRS1          | YIR021W        | -1 | -  | -  |
| 0 | MRS2          | YOR334W        | -  | 1  | 1  |
| 0 | MRS3          | YJL133W        | -1 | -  | -  |
| 0 | MRS4          | YKR052C        | -  | -1 | -1 |
| 1 | <b>MRT4</b>   | <b>YKL009W</b> | -1 | -1 | -1 |
| 0 | MSA2          | YKR077W        | -  | -  | 1  |
| 0 | MSB2          | YGR014W        | -  | -  | 1  |
| 0 | MSB3          | YNL293W        | 1  | -  | -  |
| 0 | MSB4          | YOL112W        | 1  | -1 | -1 |
| 0 | MSC1          | YML128C        | 1  | 1  | 1  |
| 0 | MSC3          | YLR219W        | -  | -  | 1  |
| 0 | MSC6          | YOR354C        | -  | -  | 1  |
| 0 | MSC7          | YHR039C        | 1  | -  | -  |
| 0 | MSD1          | YPL104W        | 1  | 1  | -  |
| 0 | MSF1          | YPR047W        | -  | 1  | 1  |
| 0 | MSH1          | YHR120W        | -1 | -  | -  |
| 0 | MSH5          | YDL154W        | -  | -1 | -  |
| 0 | MSL1          | YIR009W        | 1  | -  | -  |
| 0 | MSL5          | YLR116W        | -1 | -  | -  |
| 0 | MSM1          | YGR171C        | -  | 1  | -  |
| 0 | MSN4          | YKL062W        | 1  | 1  | 1  |
| 0 | MSN5          | YDR335W        | 1  | 1  | -  |
| 0 | MSP1          | YGR028W        | -  | 1  | 1  |
| 0 | MSS1          | YMR023C        | -  | -  | 1  |
| 0 | MSS4          | YDR208W        | -  | 1  | -  |
| 0 | MST27         | YGL051W        | -  | -  | -1 |
| 0 | MSY1          | YPL097W        | -  | 1  | 1  |
| 0 | MTC2          | YKL098W        | -  | 1  | -  |
| 0 | MTC3          | YGL226W        | -  | 1  | -  |
| 0 | MTD1          | YKR080W        | 1  | 1  | 1  |
| 0 | MTF1          | YMR228W        | -1 | -  | -  |

|   |              |                |    |    |    |
|---|--------------|----------------|----|----|----|
| 0 | MTG2         | YHR168W        | -1 | -  | -  |
| 0 | MTH1         | YDR277C        | -  | -  | 1  |
| 0 | MTL1         | YGR023W        | 1  | 1  | 1  |
| 0 | MTO1         | YGL236C        | -  | 1  | -  |
| 0 | MTQ1         | YNL063W        | -1 | -  | -  |
| 0 | MTQ2         | YDR140W        | -1 | -  | -1 |
| 1 | <b>MTR10</b> | <b>YOR160W</b> | -1 | -  | -  |
| 1 | <b>MTR3</b>  | <b>YGR158C</b> | -  | -  | -1 |
| 0 | MTR4         | YJL050W        | -  | -  | -1 |
| 0 | MTW1         | YAL034W-A      | -  | -1 | -  |
| 0 | MUB1         | YMR100W        | -1 | -  | -  |
| 0 | MUD1         | YBR119W        | -  | -  | 1  |
| 0 | MUD2         | YKL074C        | -1 | -  | -  |
| 0 | MUK1         | YPL070W        | 1  | -  | -  |
| 0 | MUM2         | YBR057C        | -1 | -1 | -  |
| 0 | MUP1         | YGR055W        | -1 | -  | -  |
| 0 | MUQ1         | YGR007W        | -1 | -1 | -  |
| 0 | MVD1         | YNR043W        | -  | -  | -1 |
| 0 | MVP1         | YMR004W        | 1  | -  | -  |
| 0 | MXR1         | YER042W        | -1 | -  | -1 |
| 0 | MXR2         | YCL033C        | -  | 1  | -  |
| 0 | MYO1         | YHR023W        | 1  | -  | -  |
| 0 | MYO2         | YOR326W        | 1  | -  | -  |
| 0 | MYO3         | YKL129C        | 1  | 1  | 1  |
| 0 | MYO4         | YAL029C        | -  | -  | 1  |
| 0 | MZM1         | YDR493W        | -  | 1  | -  |
| 0 | NAB2         | YGL122C        | -  | -1 | -1 |
| 0 | NAB3         | YPL190C        | -  | -  | -1 |
| 0 | NAF1         | YNL124W        | -1 | -  | -1 |
| 0 | NAM2         | YLR382C        | -  | 1  | 1  |
| 0 | NAN1         | YPL126W        | -  | -  | -1 |
| 0 | NAT2         | YGR147C        | -1 | -  | -  |
| 0 | NAT4         | YMR069W        | -  | 1  | -  |
| 0 | NBA1         | YOL070C        | -  | -  | -1 |
| 0 | NBP35        | YGL091C        | -1 | -  | -  |
| 0 | NCA3         | YJL116C        | 1  | 1  | 1  |
| 0 | NCB2         | YDR397C        | -  | -  | -1 |
| 0 | NCE101       | YJL205C        | -  | -  | 1  |
| 0 | NCE102       | YPR149W        | -  | -  | 1  |
| 0 | NCL1         | YBL024W        | -  | -1 | -1 |
| 1 | <b>NCP1</b>  | <b>YHR042W</b> | 1  | -  | -  |
| 0 | NCS2         | YNL119W        | -1 | -  | -1 |
| 0 | NDD1         | YOR372C        | -  | -  | 1  |
| 0 | NDE1         | YMR145C        | -  | -  | -1 |
| 0 | NDE2         | YDL085W        | -  | 1  | 1  |
| 0 | NDI1         | YML120C        | -  | -  | 1  |
| 0 | NDJ1         | YOL104C        | -1 | -  | -  |
| 0 | NDL1         | YLR254C        | 1  | -  | 1  |
| 0 | NDT80        | YHR124W        | 1  | -  | 1  |
| 1 | <b>NET1</b>  | <b>YJL076W</b> | 1  | -  | -  |

|               |                |    |    |    |
|---------------|----------------|----|----|----|
| 0 NFS1        | YCL017C        | 1  | -  | -  |
| 0 NGL1        | YOL042W        | -1 | -1 | -1 |
| 0 NGL3        | YML118W        | 1  | 1  | 1  |
| 0 NHA1        | YLR138W        | -  | -  | -1 |
| 1 <b>NHP2</b> | <b>YDL208W</b> | -  | -1 | -1 |
| 0 NHP6A       | YPR052C        | -1 | -1 | -  |
| 0 NHP6B       | YBR089C-A      | 1  | -  | 1  |
| 0 NHP6B       | YBR090C        | 1  | -  | 1  |
| 0 NHX1        | YDR456W        | 1  | -  | 1  |
| 0 NIC96       | YFR002W        | -1 | -  | -  |
| 0 NIP100      | YPL174C        | 1  | -  | -  |
| 0 NIP7        | YPL211W        | -1 | -  | -1 |
| 0 NIS1        | YNL078W        | -1 | -  | -  |
| 0 NIT2        | YJL126W        | -1 | -  | -  |
| 0 NMA1        | YLR328W        | -1 | -  | -1 |
| 0 NMA2        | YGR010W        | 1  | -  | -  |
| 0 NMD3        | YHR170W        | -1 | -1 | -1 |
| 0 NMD4        | YLR363C        | -  | -1 | -1 |
| 0 NMD5        | YJR132W        | -  | -  | -1 |
| 0 NNF1        | YJR112W        | -1 | -1 | -  |
| 0 NNK1        | YKL171W        | 1  | -  | -  |
| 0 NNT1        | YLR285W        | -  | -1 | -1 |
| 0 NOB1        | YOR056C        | -1 | -1 | -1 |
| 0 NOC2        | YOR206W        | -  | -  | -1 |
| 0 NOC3        | YLR002C        | -1 | -1 | -1 |
| 1 <b>NOC4</b> | <b>YPR144C</b> | -1 | -  | -1 |
| 0 NOG1        | YPL093W        | -1 | -  | -1 |
| 0 NOG2        | YNR053C        | -1 | -  | -1 |
| 0 NOP1        | YDL014W        | -1 | -  | -1 |
| 0 NOP12       | YOL041C        | -  | -  | -1 |
| 0 NOP13       | YNL175C        | -1 | -1 | -1 |
| 0 NOP14       | YDL148C        | -  | -  | -1 |
| 0 NOP15       | YNL110C        | -  | -  | -1 |
| 0 NOP16       | YER002W        | -  | -1 | -  |
| 0 NOP19       | YGR251W        | -  | -1 | -1 |
| 0 NOP2        | YNL061W        | -  | -  | -1 |
| 0 NOP4        | YPL043W        | -  | -  | -1 |
| 0 NOP58       | YOR310C        | -  | -1 | -1 |
| 0 NOP6        | YDL213C        | -  | -1 | -1 |
| 0 NOP7        | YGR103W        | -  | -1 | -1 |
| 0 NOP8        | YOL144W        | -  | -  | -1 |
| 0 NOP9        | YJL010C        | -  | -1 | -1 |
| 0 NOT5        | YPR072W        | -  | -1 | -  |
| 0 NPA3        | YJR072C        | -  | -  | -1 |
| 1 <b>NPL6</b> | <b>YMR091C</b> | -1 | -1 | -1 |
| 1 <b>NPP1</b> | <b>YCR026C</b> | 1  | -  | -  |
| 0 NPR1        | YNL183C        | -  | 1  | -  |
| 0 NPR2        | YEL062W        | 1  | 1  | -  |
| 0 NPT1        | YOR209C        | -  | -1 | -  |
| 0 NQM1        | YGR043C        | 1  | 1  | 1  |

|                |                |    |    |    |
|----------------|----------------|----|----|----|
| 0 NRD1         | YNL251C        | -  | -1 | -1 |
| 0 NRG1         | YDR043C        | 1  | -  | 1  |
| 0 NRG2         | YBR066C        | 1  | -  | 1  |
| 0 NRK1         | YNL129W        | -  | -1 | -1 |
| 0 NRM1         | YNR009W        | -1 | -  | -  |
| 0 NRT1         | YOR071C        | 1  | -  | -  |
| 0 NSA1         | YGL111W        | -  | -  | -1 |
| 0 NSA2         | YER126C        | -  | -1 | -1 |
| 0 NSE1         | YLR007W        | 1  | -  | -  |
| 0 NSE3         | YDR288W        | -1 | -  | -  |
| 0 NSE4         | YDL105W        | -  | -1 | -  |
| 0 NSE5         | YML023C        | -1 | -  | -1 |
| 0 NSG1         | YHR133C        | -1 | -1 | -  |
| 0 NSG2         | YNL156C        | 1  | -  | -  |
| 0 NSI1         | YDR026C        | -  | -  | -1 |
| 1 <b>NSR1</b>  | <b>YGR159C</b> | -1 | -  | -1 |
| 0 NTE1         | YML059C        | -  | 1  | 1  |
| 0 NTG1         | YAL015C        | -  | 1  | -  |
| 0 NTH1         | YDR001C        | 1  | 1  | 1  |
| 0 NTH2         | YBR001C        | -  | 1  | 1  |
| 1 <b>NTR2</b>  | <b>YKR022C</b> | 1  | -  | -  |
| 0 NUC1         | YJL208C        | -1 | -1 | -1 |
| 0 NUG1         | YER006W        | -1 | -1 | -1 |
| 0 NUP157       | YER105C        | -  | 1  | -  |
| 0 NUP170       | YBL079W        | -  | 1  | -  |
| 0 NUP188       | YML103C        | -  | 1  | -  |
| 0 NUP49        | YGL172W        | -1 | -  | -  |
| 0 NUP57        | YGR119C        | -  | -1 | -  |
| 1 <b>NUP60</b> | <b>YAR002W</b> | -1 | -  | -  |
| 0 NUP85        | YJR042W        | -  | -1 | -  |
| 0 NVJ1         | YHR195W        | -  | -  | 1  |
| 0 OAC1         | YKL120W        | -1 | -1 | -  |
| 0 OAF1         | YAL051W        | -  | 1  | -  |
| 0 OCA2         | YNL056W        | -  | -1 | -  |
| 0 OCA6         | YDR067C        | -  | -  | 1  |
| 0 OCH1         | YGL038C        | -  | -  | 1  |
| 0 OCT1         | YKL134C        | -1 | -  | -  |
| 0 ODC2         | YOR222W        | -1 | -  | -  |
| 0 OLA1         | YBR025C        | -1 | -  | -  |
| 0 OM14         | YBR230C        | -1 | 1  | 1  |
| 0 OM45         | YIL136W        | -  | 1  | 1  |
| 0 OMA1         | YKR087C        | -1 | -  | -  |
| 1 <b>OPI1</b>  | <b>YHL020C</b> | -1 | -1 | -  |
| 0 OPI3         | YJR073C        | 1  | 1  | 1  |
| 0 OPT1         | YJL212C        | -1 | -  | -1 |
| 0 OPT2         | YPR194C        | -  | 1  | -  |
| 0 OPY1         | YBR129C        | -  | -1 | -  |
| 0 OPY2         | YPR075C        | -  | -  | 1  |
| 1 <b>ORC5</b>  | <b>YNL261W</b> | -1 | -  | -  |
| 0 ORM2         | YLR350W        | -1 | -  | -  |

|   |             |                |    |    |    |
|---|-------------|----------------|----|----|----|
| 0 | ORT1        | YOR130C        | 1  | -  | -  |
| 0 | OSH2        | YDL019C        | -  | -  | 1  |
| 0 | OSH6        | YKR003W        | -  | -  | -1 |
| 0 | OST2        | YOR103C        | -1 | -  | -  |
| 0 | OST6        | YML019W        | -  | -1 | -  |
| 0 | OSW2        | YLR054C        | 1  | 1  | 1  |
| 0 | OSW5        | YMR148W        | -  | -  | 1  |
| 0 | OTU1        | YFL044C        | -  | -  | -1 |
| 0 | OTU2        | YHL013C        | -  | -  | -1 |
| 0 | OXF1        | YKL215C        | -  | 1  | -  |
| 0 | OYE3        | YPL171C        | -  | -  | 1  |
| 0 | PAC1        | YOR269W        | -1 | -1 | -  |
| 0 | PAC10       | YGR078C        | -1 | -  | -  |
| 0 | PAC2        | YER007W        | -1 | -  | -1 |
| 0 | PAD1        | YDR538W        | -1 | -1 | -  |
| 0 | PAI3        | YMR174C        | 1  | 1  | 1  |
| 0 | PAM1        | YDR251W        | -  | -  | 1  |
| 0 | PAM18       | YLR008C        | -1 | -  | -  |
| 0 | PAN1        | YIR006C        | 1  | -  | -  |
| 0 | PAN6        | YIL145C        | -  | -  | -1 |
| 0 | PAP2        | YOL115W        | -1 | -  | -  |
| 0 | PAU1        | YIL176C        | -  | -1 | -  |
| 0 | PAU1        | YJL223C        | -  | -1 | -  |
| 0 | PAU10       | YDR542W        | 1  | -1 | -  |
| 0 | PAU11       | YGL261C        | 1  | -1 | -  |
| 0 | PAU12       | YGR294W        | 1  | -1 | -  |
| 0 | PAU13       | YHL046C        | 1  | -1 | -  |
| 0 | PAU2        | YEL049W        | 1  | 1  | 1  |
| 0 | PAU4        | YLR461W        | 1  | -1 | -  |
| 0 | PAU4        | YOL161C        | 1  | -1 | -  |
| 0 | PAU5        | YFL020C        | 1  | 1  | 1  |
| 0 | PAU6        | YLL064C        | 1  | -1 | -  |
| 0 | PAU6        | YNR076W        | 1  | -1 | -  |
| 0 | PAU7        | YAR020C        | 1  | 1  | -  |
| 0 | PAU8        | YAL068C        | 1  | -1 | -  |
| 0 | PAU9        | YBL108C-A      | 1  | -1 | -  |
| 0 | PBA1        | YLR199C        | -1 | -  | -  |
| 0 | PBI2        | YNL015W        | 1  | 1  | 1  |
| 1 | <b>PBP2</b> | <b>YBR233W</b> | -  | -1 | -  |
| 0 | PBP4        | YDL053C        | -  | -1 | -  |
| 0 | PBS2        | YJL128C        | -  | 1  | -  |
| 0 | PCA1        | YBR295W        | 1  | -  | -  |
| 0 | PCC1        | YKR095W-A      | -1 | -1 | -  |
| 0 | PCD1        | YLR151C        | 1  | -  | 1  |
| 0 | PCL5        | YHR071W        | 1  | -  | 1  |
| 0 | PCL8        | YPL219W        | -1 | -  | -  |
| 0 | PCM1        | YEL058W        | 1  | -  | -  |
| 1 | <b>PCP1</b> | <b>YGR101W</b> | -1 | -  | -  |
| 0 | PDC6        | YGR087C        | -  | 1  | -  |
| 0 | PDE1        | YGL248W        | 1  | 1  | 1  |

|               |                |           |          |          |
|---------------|----------------|-----------|----------|----------|
| 0 PDE2        | YOR360C        | -         | 1        | -        |
| 0 PDH1        | YPR002W        | 1         | 1        | 1        |
| 0 PDR1        | YGL013C        | 1         | 1        | -        |
| 0 PDR10       | YOR328W        | 1         | 1        | -        |
| 0 PDR11       | YIL013C        | 1         | -1       | -1       |
| 0 PDR12       | YPL058C        | -1        | -        | -1       |
| 0 PDR15       | YDR406W        | 1         | 1        | -        |
| 0 PDR16       | YNL231C        | -         | -1       | -        |
| 0 PDR18       | YNR070W        | -1        | -        | -1       |
| 0 PDR3        | YBL005W        | -         | -        | -1       |
| 0 PDR5        | YOR153W        | -         | -        | -1       |
| 0 PDR8        | YLR266C        | -         | -1       | -        |
| <b>1 PDS5</b> | <b>YMR076C</b> | <b>1</b>  | <b>-</b> | <b>-</b> |
| 0 PEP12       | YOR036W        | 1         | -        | -        |
| 0 PEP4        | YPL154C        | 1         | 1        | 1        |
| 0 PES4        | YFR023W        | -         | 1        | -        |
| 0 PET10       | YKR046C        | 1         | 1        | 1        |
| 0 PET100      | YDR079W        | -         | 1        | 1        |
| 0 PET112      | YBL080C        | -         | 1        | -        |
| 0 PET117      | YER058W        | -         | 1        | 1        |
| 0 PET123      | YOR158W        | -         | 1        | 1        |
| 0 PET127      | YOR017W        | -         | 1        | -        |
| 0 PET191      | YJR034W        | -         | 1        | 1        |
| 0 PET309      | YLR067C        | -         | -        | 1        |
| 0 PET494      | YNR045W        | -         | -        | 1        |
| 0 PET54       | YGR222W        | -         | -        | 1        |
| 0 PEX1        | YKL197C        | -         | -        | -1       |
| 0 PEX11       | YOL147C        | -         | -        | -1       |
| 0 PEX12       | YMR026C        | -         | -1       | -1       |
| 0 PEX13       | YLR191W        | -         | -        | -1       |
| 0 PEX17       | YNL214W        | -1        | -        | -        |
| 0 PEX18       | YHR160C        | -         | 1        | -        |
| 0 PEX19       | YDL065C        | -         | -1       | -        |
| 0 PEX2        | YJL210W        | -1        | -        | -        |
| 0 PEX21       | YGR239C        | -         | 1        | -1       |
| 0 PEX25       | YPL112C        | -         | -        | -1       |
| 0 PEX29       | YDR479C        | -         | -        | 1        |
| 0 PEX30       | YLR324W        | -         | 1        | -        |
| 0 PEX31       | YGR004W        | -1        | -        | -        |
| 0 PEX32       | YBR168W        | -1        | -        | -        |
| 0 PEX4        | YGR133W        | 1         | -        | 1        |
| 0 PEX7        | YDR142C        | -1        | -        | -        |
| 0 PEX8        | YGR077C        | -         | 1        | -        |
| 0 PFA5        | YDR459C        | -1        | -        | -        |
| 0 PFK26       | YIL107C        | 1         | 1        | 1        |
| 0 PFS2        | YNL317W        | -1        | -        | -        |
| 0 PGA2        | YNL149C        | -         | -        | -1       |
| 0 PGC1        | YPL206C        | -         | 1        | 1        |
| <b>1 PGD1</b> | <b>YGL025C</b> | <b>-1</b> | <b>-</b> | <b>-</b> |
| 0 PGM1        | YKL127W        | -         | -        | -1       |

|                |                |    |    |    |
|----------------|----------------|----|----|----|
| 0 PGM2         | YMR105C        | 1  | 1  | 1  |
| 0 PGM3         | YMR278W        | -  | 1  | 1  |
| 0 PGU1         | YJR153W        | -1 | -  | 1  |
| 0 PHA2         | YNL316C        | -1 | -  | -  |
| 0 PHB1         | YGR132C        | -  | -  | 1  |
| 0 PHD1         | YKL043W        | -1 | -  | 1  |
| 0 PHM6         | YDR281C        | -1 | -1 | -1 |
| 0 PHM7         | YOL084W        | -  | 1  | -  |
| 0 PHM8         | YER037W        | 1  | 1  | 1  |
| 0 PHO11        | YAR071W        | -1 | -1 | -1 |
| 0 PHO12        | YHR215W        | -1 | -1 | -1 |
| 0 PHO13        | YDL236W        | -1 | -  | -1 |
| 0 PHO3         | YBR092C        | -1 | 1  | -1 |
| 0 PHO4         | YFR034C        | -1 | -1 | -1 |
| 0 PHO5         | YBR093C        | -1 | -1 | -1 |
| 1 <b>PHO80</b> | <b>YOL001W</b> | -1 | -  | -  |
| 0 PHO81        | YGR233C        | -1 | -  | -  |
| 0 PHO84        | YML123C        | -1 | -  | -  |
| 1 <b>PHO85</b> | <b>YPL031C</b> | -  | -  | 1  |
| 0 PHO86        | YJL117W        | -1 | -  | -  |
| 1 <b>PHO87</b> | <b>YCR037C</b> | 1  | 1  | -  |
| 0 PHO90        | YJL198W        | -1 | -  | -1 |
| 0 PIB2         | YGL023C        | 1  | -  | -1 |
| 0 PIC2         | YER053C        | 1  | 1  | 1  |
| 1 <b>PIF1</b>  | <b>YML061C</b> | -1 | -  | -  |
| 0 PIH1         | YHR034C        | -1 | -  | -  |
| 0 PIM1         | YBL022C        | -  | 1  | -  |
| 0 PIN2         | YOR104W        | 1  | -  | -  |
| 0 PIN3         | YPR154W        | 1  | -  | 1  |
| 0 PIN4         | YBL051C        | 1  | -  | -  |
| 0 PIP2         | YOR363C        | -  | -  | -1 |
| 0 PIR3         | YKL163W        | 1  | 1  | 1  |
| 0 PKH1         | YDR490C        | -  | 1  | -  |
| 0 PKH2         | YOL100W        | 1  | 1  | -  |
| 1 <b>PKP1</b>  | <b>YIL042C</b> | -  | -  | 1  |
| 0 PKP2         | YGL059W        | 1  | 1  | 1  |
| 0 PLB1         | YMR008C        | 1  | -  | -  |
| 0 PLB2         | YMR006C        | 1  | -  | 1  |
| 0 PLB3         | YOL011W        | 1  | -  | -  |
| 0 PLM2         | YDR501W        | -1 | -  | -  |
| 0 PLP2         | YOR281C        | -  | -1 | -  |
| 0 PMC1         | YGL006W        | 1  | 1  | 1  |
| 0 PMD1         | YER132C        | 1  | -  | -  |
| 0 PMT5         | YDL093W        | 1  | -  | -  |
| 0 PNC1         | YGL037C        | -  | 1  | 1  |
| 0 PNG1         | YPL096W        | -  | -1 | -  |
| 0 PNO1         | YOR145C        | -1 | -  | -1 |
| 0 PNP1         | YLR209C        | -  | -  | 1  |
| 0 PNS1         | YOR161C        | -1 | 1  | -1 |
| 0 POA1         | YBR022W        | -  | 1  | -  |



|                |                |    |    |    |
|----------------|----------------|----|----|----|
| 0 POB3         | YML069W        | -  | -1 | -  |
| 0 POF1         | YCL047C        | -  | 1  | -  |
| 1 <b>POL12</b> | <b>YBL035C</b> | -1 | -1 | -  |
| 1 <b>POL30</b> | <b>YBR088C</b> | -1 | -1 | -  |
| 1 <b>POL32</b> | <b>YJR043C</b> | -  | -1 | -1 |
| 0 POL5         | YEL055C        | -  | -1 | -1 |
| 0 POM33        | YLL023C        | 1  | 1  | 1  |
| 0 POP1         | YNL221C        | -  | -  | -1 |
| 0 POP3         | YNL282W        | -1 | -  | -  |
| 0 POP4         | YBR257W        | -  | -  | -1 |
| 0 POP5         | YAL033W        | -1 | -  | -  |
| 0 POP6         | YGR030C        | -1 | -  | -  |
| 1 <b>POP7</b>  | <b>YBR167C</b> | -  | -  | -1 |
| 0 POR1         | YNL055C        | -  | 1  | 1  |
| 0 POR2         | YIL114C        | 1  | -1 | -  |
| 0 POS5         | YPL188W        | -1 | -  | -  |
| 0 PPA1         | YHR026W        | -  | -1 | -  |
| 0 PPA2         | YMR267W        | -  | 1  | -  |
| 1 <b>PPE1</b>  | <b>YHR075C</b> | -  | -  | 1  |
| 0 PPG1         | YNR032W        | -1 | -  | -  |
| 0 PPH3         | YDR075W        | -1 | -  | -  |
| 0 PPM2         | YOL141W        | -  | -  | -1 |
| 0 PPN1         | YDR452W        | 1  | -  | 1  |
| 0 PPT1         | YGR123C        | -1 | -1 | -1 |
| 0 PPT2         | YPL148C        | -  | 1  | -  |
| 0 PPX1         | YHR201C        | -1 | -1 | -1 |
| 0 PPZ2         | YDR436W        | -  | 1  | -  |
| 0 PRB1         | YEL060C        | 1  | 1  | 1  |
| 0 PRC1         | YMR297W        | -  | 1  | -  |
| 0 PRD1         | YCL057W        | 1  | -  | -  |
| 0 PRE9         | YGR135W        | -  | -1 | -  |
| 0 PRI2         | YKL045W        | -  | -1 | -  |
| 0 PRM10        | YJL108C        | -  | -  | -1 |
| 0 PRM2         | YIL037C        | -  | -  | 1  |
| 0 PRM3         | YPL192C        | -1 | -  | -  |
| 0 PRM4         | YPL156C        | 1  | -1 | -  |
| 0 PRM5         | YIL117C        | 1  | -  | -  |
| 0 PRM6         | YML047C        | -1 | -1 | -1 |
| 0 PRM7         | YDL038C        | 1  | -  | -  |
| 0 PRM7         | YDL039C        | 1  | -  | -1 |
| 0 PRM9         | YAR031W        | 1  | -  | -1 |
| 1 <b>PRO1</b>  | <b>YDR300C</b> | -  | -  | -1 |
| 0 PRP11        | YDL043C        | -1 | -1 | -1 |
| 0 PRP16        | YKR086W        | -1 | -  | -  |
| 0 PRP19        | YLL036C        | -1 | -  | -  |
| 0 PRP2         | YNR011C        | -  | -  | -1 |
| 0 PRP21        | YJL203W        | -  | -  | -1 |
| 0 PRP24        | YMR268C        | -1 | -  | -  |
| 0 PRP28        | YDR243C        | -  | -  | -1 |
| 1 <b>PRP31</b> | <b>YGR091W</b> | -  | -  | -1 |

|         |         |    |    |    |
|---------|---------|----|----|----|
| 1 PRP4  | YPR178W | -  | -  | -1 |
| 1 PRP43 | YGL120C | -  | -  | -1 |
| 0 PRP46 | YPL151C | -1 | -  | -1 |
| 0 PRR1  | YKL116C | -1 | -  | -  |
| 0 PRS1  | YKL181W | -1 | -1 | -1 |
| 0 PRS2  | YER099C | -1 | -  | -  |
| 1 PRS3  | YHL011C | -  | -  | -1 |
| 0 PRS4  | YBL068W | -1 | -1 | -1 |
| 1 PRS5  | YOL061W | -1 | -  | -1 |
| 0 PRT1  | YOR361C | -1 | -  | -1 |
| 0 PRX1  | YBL064C | 1  | 1  | 1  |
| 0 PRY1  | YJL079C | 1  | -  | 1  |
| 0 PRY3  | YJL078C | -  | 1  | -  |
| 0 PSD1  | YNL169C | -1 | -  | -  |
| 0 PSD2  | YGR170W | 1  | -  | -  |
| 0 PSE1  | YMR308C | -1 | -  | -  |
| 0 PSF2  | YJL072C | -1 | -  | -1 |
| 0 PSK1  | YAL017W | -  | 1  | 1  |
| 0 PSO2  | YMR137C | 1  | -  | -  |
| 0 PSP1  | YDR505C | -  | 1  | -  |
| 0 PSP2  | YML017W | 1  | -  | -  |
| 0 PST1  | YDR055W | 1  | 1  | -  |
| 0 PST2  | YDR032C | 1  | 1  | 1  |
| 1 PSY4  | YBL046W | -1 | -  | -  |
| 1 PTC1  | YDL006W | -1 | -  | -  |
| 0 PTC2  | YER089C | 1  | -  | -  |
| 0 PTH2  | YBL057C | -1 | -  | -  |
| 0 PTK1  | YKL198C | 1  | -  | -  |
| 0 PTK2  | YJR059W | 1  | 1  | 1  |
| 0 PTM1  | YKL039W | 1  | -  | -  |
| 0 PTP2  | YOR208W | 1  | 1  | -  |
| 0 PTP3  | YER075C | -1 | -  | -  |
| 0 PTR2  | YKR093W | 1  | -  | -  |
| 0 PTR3  | YFR029W | 1  | 1  | -  |
| 0 PUF2  | YPR042C | 1  | 1  | -  |
| 0 PUF3  | YLL013C | 1  | -  | -  |
| 0 PUF6  | YDR496C | -1 | -  | -1 |
| 0 PUN1  | YLR414C | 1  | -  | 1  |
| 0 PUP1  | YOR157C | -  | -1 | -  |
| 0 PUS1  | YPL212C | -1 | -1 | -1 |
| 0 PUS4  | YNL292W | -1 | -1 | -1 |
| 0 PUS5  | YLR165C | -  | -  | 1  |
| 0 PUS7  | YOR243C | -  | -1 | -1 |
| 0 PUS9  | YDL036C | -  | -1 | -1 |
| 0 PUT1  | YLR142W | 1  | 1  | -  |
| 0 PUT2  | YHR037W | -1 | -  | -  |
| 0 PWP1  | YLR196W | -  | -  | -1 |
| 0 PWP2  | YCR057C | -1 | -  | -1 |
| 0 PXA1  | YPL147W | -  | -  | -1 |
| 0 PXL1  | YKR090W | -  | -  | 1  |

|                |                |    |    |    |
|----------------|----------------|----|----|----|
| 0 PYC1         | YGL062W        | 1  | 1  | 1  |
| 0 PYC2         | YBR218C        | 1  | -  | -  |
| 0 PYK2         | YOR347C        | 1  | 1  | 1  |
| 0 QCR10        | YHR001W-A      | -1 | 1  | 1  |
| 0 QCR2         | YPR191W        | -  | -  | 1  |
| 0 QCR7         | YDR529C        | -  | -  | 1  |
| 0 QCR8         | YJL166W        | -  | -  | 1  |
| 0 QCR9         | YGR183C        | -  | -  | 1  |
| 0 QDR1         | YIL120W        | -  | 1  | -  |
| 0 QDR2         | YIL121W        | -1 | -1 | -  |
| 0 QDR3         | YBR043C        | 1  | -  | -  |
| 0 QRI5         | YLR204W        | -  | 1  | 1  |
| 0 RAD14        | YMR201C        | 1  | -  | -  |
| 0 RAD16        | YBR114W        | -  | 1  | -  |
| 0 RAD2         | YGR258C        | 1  | 1  | 1  |
| <b>1 RAD24</b> | <b>YER173W</b> | -  | -1 | -1 |
| 0 RAD28        | YDR030C        | 1  | 1  | 1  |
| 0 RAD3         | YER171W        | -1 | -1 | -  |
| 0 RAD4         | YER162C        | -  | -  | 1  |
| <b>1 RAD50</b> | <b>YNL250W</b> | 1  | -  | -  |
| 0 RAD51        | YER095W        | -  | -  | 1  |
| 0 RAD52        | YML032C        | -1 | -  | -  |
| 0 RAD54        | YGL163C        | 1  | 1  | 1  |
| 0 RAD7         | YJR052W        | 1  | -  | -  |
| 0 RAI1         | YGL246C        | -1 | -  | -  |
| 0 RAM1         | YDL090C        | -1 | -  | -  |
| 0 RAM2         | YKL019W        | -1 | -  | -  |
| <b>1 RAP1</b>  | <b>YNL216W</b> | -1 | -  | -1 |
| 0 RAS1         | YOR101W        | -1 | -1 | -1 |
| 0 RAX1         | YOR301W        | -1 | -  | -  |
| 0 RBG1         | YAL036C        | -  | -  | -1 |
| 0 RBG2         | YGR173W        | -  | -  | -1 |
| 0 RBK1         | YCR036W        | 1  | -  | -  |
| 0 RBS1         | YDL189W        | -  | -1 | -1 |
| 0 RCF1         | YML030W        | -  | -  | 1  |
| 0 RCF2         | YNR018W        | -  | 1  | -  |
| 0 RCL1         | YOL010W        | -1 | -  | -1 |
| 0 RCN2         | YOR220W        | 1  | 1  | 1  |
| 0 RCR1         | YBR005W        | 1  | -  | -  |
| 0 RCR2         | YDR003W        | -  | -  | 1  |
| 0 RCS1         | YGL071W        | 1  | -  | -  |
| 0 RCY1         | YJL204C        | 1  | -  | -  |
| 0 RDL1         | YOR285W        | 1  | 1  | 1  |
| 0 RDL2         | YOR286W        | -  | 1  | -  |
| 0 RDR1         | YOR380W        | 1  | -  | 1  |
| 0 RDS1         | YCR106W        | -  | -1 | -  |
| 0 RDS2         | YPL133C        | -1 | -  | -1 |
| 0 REE1         | YJL217W        | 1  | -  | -  |
| <b>1 REF2</b>  | <b>YDR195W</b> | -1 | -1 | -  |
| 0 REG1         | YDR028C        | 1  | -  | -  |

|               |                |    |    |    |
|---------------|----------------|----|----|----|
| 0 REG2        | YBR050C        | 1  | -  | 1  |
| 0 REH1        | YLR387C        | -1 | -1 | -  |
| 0 REI1        | YBR267W        | -1 | -  | -1 |
| 0 RER1        | YCL001W        | -1 | -  | -  |
| 1 <b>RER2</b> | <b>YBR002C</b> | -1 | -1 | -  |
| 0 RET1        | YOR207C        | -  | -  | -1 |
| 0 REV3        | YPL167C        | -  | 1  | -  |
| 0 REX4        | YOL080C        | -1 | -1 | -1 |
| 1 <b>RFA2</b> | <b>YNL312W</b> | -1 | -  | -  |
| 0 RFC4        | YOL094C        | -1 | -  | -  |
| 0 RFC5        | YBR087W        | -1 | -1 | -  |
| 0 RFS1        | YBR052C        | -  | 1  | 1  |
| 0 RFU1        | YLR073C        | -1 | -  | -1 |
| 0 RFX1        | YLR176C        | 1  | 1  | -  |
| 0 RGA1        | YOR127W        | 1  | -  | -1 |
| 0 RGI1        | YER067W        | -  | -  | 1  |
| 0 RGL1        | YPL066W        | -  | 1  | -  |
| 0 RGM1        | YMR182C        | 1  | 1  | 1  |
| 0 RGS2        | YOR107W        | -1 | 1  | -  |
| 0 RGT2        | YDL138W        | 1  | -  | -1 |
| 0 RHB1        | YCR027C        | -1 | -  | -  |
| 0 RHO1        | YPR165W        | -  | -1 | -  |
| 0 RHO3        | YIL118W        | -  | -1 | -  |
| 0 RHR2        | YIL053W        | -  | -  | -1 |
| 0 RIA1        | YNL163C        | -  | -  | -1 |
| 0 RIB7        | YBR153W        | -1 | -  | -  |
| 0 RIM101      | YHL027W        | -  | 1  | -  |
| 0 RIM11       | YMR139W        | -  | -  | 1  |
| 0 RIM15       | YFL033C        | -  | 1  | 1  |
| 0 RIM20       | YOR275C        | 1  | 1  | -  |
| 0 RIM21       | YNL294C        | 1  | -  | -  |
| 0 RIM4        | YHL024W        | 1  | 1  | 1  |
| 0 RIM8        | YGL045W        | -  | -  | 1  |
| 0 RIO1        | YOR119C        | -1 | -  | -1 |
| 0 RIO2        | YNL207W        | -1 | -  | -1 |
| 0 RIP1        | YEL024W        | -  | -  | 1  |
| 0 RIT1        | YMR283C        | -1 | -  | -1 |
| 0 RIX1        | YHR197W        | -1 | -  | -1 |
| 0 RIX7        | YLL034C        | -  | -  | -1 |
| 0 RKI1        | YOR095C        | -1 | -1 | -1 |
| 0 RKM5        | YLR137W        | -  | 1  | -  |
| 0 RLI1        | YDR091C        | -1 | -  | -1 |
| 0 RLM1        | YPL089C        | 1  | 1  | -  |
| 0 RLP24       | YLR009W        | -  | -  | -1 |
| 0 RLP7        | YNL002C        | -  | -  | -1 |
| 0 RMA1        | YKL132C        | -1 | -  | -  |
| 0 RMD1        | YDL001W        | -1 | -  | -  |
| 0 RMD11       | YHL023C        | -  | -  | 1  |
| 0 RMD6        | YEL072W        | -  | 1  | -1 |
| 0 RMD8        | YFR048W        | -1 | -  | -  |

|                 |                  |    |    |    |
|-----------------|------------------|----|----|----|
| 0 RME1          | YGR044C          | 1  | -  | -  |
| 1 <b>RMI1</b>   | <b>YPL024W</b>   | -  | 1  | 1  |
| 0 RML2          | YEL050C          | -  | 1  | 1  |
| 0 RMR1          | YGL250W          | -  | -  | 1  |
| 0 RMT2          | YDR465C          | -1 | -1 | -1 |
| 0 RNA1          | YMR235C          | -  | -1 | -  |
| 1 <b>RNA14</b>  | <b>YMR061W</b>   | -  | -1 | -  |
| 1 <b>RNA15</b>  | <b>YGL044C</b>   | -  | -1 | -  |
| 0 RNH1          | YMR234W          | -1 | -  | -1 |
| 1 <b>RNH201</b> | <b>YNL072W</b>   | -1 | -  | -1 |
| 0 RNH202        | YDR279W          | -1 | -1 | -1 |
| 1 <b>RNR1</b>   | <b>YER070W</b>   | -  | 1  | -  |
| 1 <b>RNR2</b>   | <b>YJL026W</b>   | 1  | 1  | -  |
| 0 RNR3          | YIL066C          | 1  | 1  | -  |
| 0 RNR4          | YGR180C          | 1  | -  | -  |
| 1 <b>RNT1</b>   | <b>YMR239C</b>   | -1 | -  | -1 |
| 0 RNY1          | YPL123C          | 1  | 1  | 1  |
| 0 ROD1          | YOR018W          | -  | -  | 1  |
| 0 ROG1          | YGL144C          | -1 | -  | -  |
| 0 ROG3          | YFR022W          | 1  | 1  | -  |
| 0 ROK1          | YGL171W          | -1 | -  | -1 |
| 0 ROM1          | YGR070W          | 1  | 1  | 1  |
| 0 ROT1          | YMR200W          | 1  | -  | -  |
| 0 ROX1          | YPR065W          | -  | -  | 1  |
| 0 ROY1          | YMR258C          | -1 | -  | -  |
| 0 RPA12         | YJR063W          | -  | -  | -1 |
| 0 RPA135        | YPR010C          | -  | -  | -1 |
| 1 <b>RPA14</b>  | <b>YDR156W</b>   | -1 | -  | -  |
| 0 RPA190        | YOR341W          | -  | -  | -1 |
| 0 RPA34         | YJL148W          | -  | -  | -1 |
| 0 RPA43         | YOR340C          | -1 | -1 | -1 |
| 0 RPA49         | YNL248C          | -1 | -1 | -1 |
| 0 RPB3          | YIL021W          | -  | -1 | -1 |
| 1 <b>RPB5</b>   | <b>YBR154C</b>   | -1 | -  | -  |
| 1 <b>RPB7</b>   | <b>YDR404C</b>   | -  | -1 | -  |
| 0 RPB8          | YOR224C          | -  | -  | -1 |
| 1 <b>RPB9</b>   | <b>YGL070C</b>   | -1 | -1 | -  |
| 1 <b>RPC10</b>  | <b>YHR143W-A</b> | -  | -  | -1 |
| 0 RPC17         | YJL011C          | -1 | -  | -  |
| 0 RPC19         | YNL113W          | -  | -  | -1 |
| 0 RPC25         | YKL144C          | -  | -  | -1 |
| 0 RPC31         | YNL151C          | -  | -1 | -1 |
| 0 RPC34         | YNR003C          | -  | -  | -1 |
| 0 RPC37         | YKR025W          | -  | -1 | -1 |
| 0 RPC40         | YPR110C          | -1 | -  | -1 |
| 0 RPC53         | YDL150W          | -1 | -  | -1 |
| 0 RPC82         | YPR190C          | -  | -  | -1 |
| 0 RPF1          | YHR088W          | -  | -  | -1 |
| 0 RPF2          | YKR081C          | -1 | -  | -1 |
| 0 RPH1          | YER169W          | -  | 1  | -  |

|                |                |    |    |    |
|----------------|----------------|----|----|----|
| 0 RPI1         | YIL119C        | -1 | -  | 1  |
| 0 RPL15B       | YMR121C        | -  | 1  | -  |
| 0 RPL18B       | YNL301C        | -  | -1 | -1 |
| 0 RPL22B       | YFL034C-A      | -1 | -  | -  |
| 0 RPM2         | YML091C        | -  | -  | 1  |
| 0 RPN10        | YHR200W        | -1 | -  | -  |
| 0 RPN13        | YLR421C        | -  | -1 | -  |
| 0 RPN3         | YER021W        | -1 | -  | -  |
| 1 <b>RPN5</b>  | <b>YDL147W</b> | -  | -1 | -  |
| 1 <b>RPN7</b>  | <b>YPR108W</b> | -  | -1 | -  |
| 0 RPN8         | YOR261C        | -  | -1 | -  |
| 0 RPN9         | YDR427W        | -  | -1 | -  |
| 0 RPO26        | YPR187W        | -  | -1 | -1 |
| 0 RPP1         | YHR062C        | -1 | -  | -  |
| 0 RPR2         | YIR015W        | -  | -1 | -  |
| 0 RPS14B       | YJL191W        | -  | 1  | -1 |
| 0 RPS18B       | YML026C        | -  | -1 | -  |
| 0 RPS22B       | YLR367W        | -  | -1 | -  |
| 0 RPS26B       | YER131W        | -  | -1 | -  |
| 0 RPS7B        | YNL096C        | -  | -1 | -  |
| 0 RPS9A        | YPL081W        | -1 | -1 | -1 |
| 1 <b>RPT5</b>  | <b>YOR117W</b> | -  | -1 | -  |
| 0 RRB1         | YMR131C        | -1 | -1 | -1 |
| 0 RRF1         | YHR038W        | -  | -  | 1  |
| 0 RRG1         | YDR065W        | -1 | -  | -  |
| 0 RRI1         | YDL216C        | -  | -  | 1  |
| 0 RRI2         | YOL117W        | 1  | 1  | -  |
| 1 <b>RRM3</b>  | <b>YHR031C</b> | -1 | 1  | -  |
| 0 RRN10        | YBL025W        | -1 | -  | -  |
| 0 RRN11        | YML043C        | -1 | -  | -1 |
| 0 RRN3         | YKL125W        | -1 | -  | -  |
| 0 RRN6         | YBL014C        | -  | -  | -1 |
| 0 RRN7         | YJL025W        | -  | -  | -1 |
| 0 RRP1         | YDR087C        | -1 | -  | -1 |
| 0 RRP12        | YPL012W        | -  | -  | -1 |
| 1 <b>RRP17</b> | <b>YDR412W</b> | -1 | -1 | -1 |
| 0 RRP3         | YHR065C        | -1 | -  | -1 |
| 0 RRP4         | YHR069C        | -1 | -  | -1 |
| 0 RRP40        | YOL142W        | -1 | -  | -1 |
| 0 RRP42        | YDL111C        | -1 | -  | -1 |
| 0 RRP43        | YCR035C        | -1 | -1 | -1 |
| 0 RRP45        | YDR280W        | -1 | -1 | -1 |
| 0 RRP46        | YGR095C        | -1 | -  | -1 |
| 0 RRP5         | YMR229C        | -  | -  | -1 |
| 0 RRP6         | YOR001W        | -  | -  | -1 |
| 0 RRP7         | YCL031C        | -  | -1 | -1 |
| 1 <b>RRP8</b>  | <b>YDR083W</b> | -  | -1 | -1 |
| 0 RRP9         | YPR137W        | -1 | -  | -1 |
| 0 RRS1         | YOR294W        | -1 | -  | -1 |
| 0 RRT14        | YIL127C        | -  | -  | -1 |

|                |                |    |    |    |
|----------------|----------------|----|----|----|
| 0 RRT2         | YBR246W        | -1 | -  | -1 |
| 0 RRT8         | YOL048C        | -  | -  | 1  |
| 0 RSA3         | YLR221C        | -  | -  | -1 |
| 0 RSA4         | YCR072C        | -1 | -  | -1 |
| 0 RSB1         | YOR049C        | -1 | 1  | 1  |
| 0 RSC30        | YHR054C        | 1  | 1  | 1  |
| 0 RSC30        | YHR056C        | 1  | 1  | 1  |
| 0 RSC58        | YLR033W        | -  | -1 | -  |
| 1 <b>RSC8</b>  | <b>YFR037C</b> | -  | -1 | -  |
| 0 RSC9         | YML127W        | -  | -1 | -  |
| 0 RSF2         | YJR127C        | -  | 1  | 1  |
| 1 <b>RSM10</b> | <b>YDR041W</b> | -  | -  | 1  |
| 0 RSM18        | YER050C        | -  | 1  | 1  |
| 0 RSM19        | YNR037C        | -  | 1  | 1  |
| 0 RSM22        | YKL155C        | -  | 1  | 1  |
| 0 RSM24        | YDR175C        | -1 | -  | -  |
| 0 RSM26        | YJR101W        | -1 | 1  | 1  |
| 0 RSM27        | YGR215W        | -  | 1  | 1  |
| 0 RSM7         | YJR113C        | -  | 1  | -  |
| 0 RSN1         | YMR266W        | -  | -1 | -  |
| 0 RSR1         | YGR152C        | -  | -1 | -  |
| 0 RTA1         | YGR213C        | 1  | -  | -1 |
| 0 RTC2         | YBR147W        | 1  | 1  | 1  |
| 0 RTC3         | YHR087W        | -  | 1  | 1  |
| 0 RTC5         | YOR118W        | -  | -1 | -1 |
| 0 RTC6         | YPL183W-A      | -  | 1  | 1  |
| 1 <b>RTF1</b>  | <b>YGL244W</b> | -  | -1 | -1 |
| 0 RTG2         | YGL252C        | -  | -1 | -  |
| 0 RTK1         | YDL025C        | 1  | -  | 1  |
| 0 RTN2         | YDL204W        | -  | 1  | -  |
| 0 RTR1         | YER139C        | -  | -1 | -  |
| 0 RTR2         | YDR066C        | -  | -  | -1 |
| 0 RTS1         | YOR014W        | 1  | -  | -  |
| 0 RTS3         | YGR161C        | 1  | -  | 1  |
| 0 RTT10        | YPL183C        | -1 | -  | -1 |
| 0 RTT103       | YDR289C        | -  | -1 | -  |
| 0 RTT106       | YNL206C        | -  | -1 | -1 |
| 0 RTT107       | YHR154W        | 1  | -  | -  |
| 0 RTT109       | YLL002W        | -1 | -1 | -  |
| 0 RUD3         | YOR216C        | -  | -1 | -  |
| 0 RVB1         | YDR190C        | -  | -  | -1 |
| 0 RVB2         | YPL235W        | -1 | -1 | -1 |
| 0 RXT2         | YBR095C        | -  | -1 | -  |
| 0 SAC6         | YDR129C        | 1  | 1  | -  |
| 1 <b>SAD1</b>  | <b>YFR005C</b> | -  | -1 | -1 |
| 0 SAE2         | YGL175C        | -  | -  | -1 |
| 0 SAG1         | YJR004C        | 1  | -  | -  |
| 0 SAM1         | YLR180W        | -1 | -1 | -  |
| 0 SAM2         | YDR502C        | -  | -  | -1 |
| 0 SAM3         | YPL274W        | -1 | -1 | -1 |

|                |                |    |    |    |
|----------------|----------------|----|----|----|
| 0 SAM4         | YMR321C        | -1 | -  | -1 |
| 0 SAM4         | YPL273W        | -1 | -1 | -1 |
| 1 <b>SAN1</b>  | <b>YDR143C</b> | -1 | -  | -  |
| 0 SAP185       | YJL098W        | -  | -  | -1 |
| 1 <b>SAP30</b> | <b>YMR263W</b> | -1 | -  | -  |
| 0 SAS10        | YDL153C        | -  | -  | -1 |
| 0 SAS2         | YMR127C        | -1 | -  | -  |
| 0 SAS5         | YOR213C        | -  | -1 | -1 |
| 0 SAW1         | YAL027W        | -  | -1 | -1 |
| 0 SBE2         | YDR351W        | -  | -  | -1 |
| 0 SCH9         | YHR205W        | -1 | -  | -1 |
| 0 SCM3         | YDL139C        | -  | -  | 1  |
| 0 SCM4         | YGR049W        | 1  | -  | -  |
| 0 SCO2         | YBR024W        | 1  | -  | 1  |
| 0 SCS22        | YBL091C-A      | 1  | -  | 1  |
| 0 SCS7         | YMR272C        | -  | -  | 1  |
| 0 SCW11        | YGL028C        | -1 | 1  | -  |
| 0 SCW4         | YGR279C        | -  | -  | 1  |
| 0 SDA1         | YGR245C        | -  | -1 | -1 |
| 0 SDH1         | YKL148C        | -  | 1  | 1  |
| 0 SDH2         | YLL041C        | -  | -  | 1  |
| 0 SDH3         | YKL141W        | -  | -  | 1  |
| 0 SDH4         | YDR178W        | -  | -  | 1  |
| 0 SDO1         | YLR022C        | -1 | -  | -  |
| 0 SDS22        | YKL193C        | -  | -  | 1  |
| 0 SDS24        | YBR214W        | 1  | 1  | 1  |
| 0 SDS3         | YIL084C        | -1 | -  | -  |
| 0 SDT1         | YGL224C        | -1 | -  | -  |
| 0 SEC13        | YLR208W        | -  | -1 | -  |
| 0 SEC14        | YMR079W        | -  | -  | -1 |
| 0 SEC16        | YPL085W        | -  | 1  | -  |
| 0 SEC17        | YBL050W        | -  | -1 | -  |
| 0 SEC18        | YBR080C        | 1  | -  | -  |
| 0 SEC2         | YNL272C        | 1  | -  | -  |
| 1 <b>SEC20</b> | <b>YDR498C</b> | -1 | -1 | -  |
| 0 SEC53        | YFL045C        | -  | -1 | -  |
| 0 SEC62        | YPL094C        | -  | -  | -1 |
| 1 <b>SEC63</b> | <b>YOR254C</b> | -  | -  | -1 |
| 0 SEC65        | YML105C        | -1 | -  | -  |
| 0 SEC8         | YPR055W        | -  | 1  | -  |
| 0 SEC9         | YGR009C        | 1  | -  | -  |
| 0 SED1         | YDR077W        | 1  | 1  | 1  |
| 0 SED4         | YCR067C        | 1  | -  | -  |
| 0 SEE1         | YIL064W        | -1 | -  | -1 |
| 0 SEG1         | YMR086W        | 1  | -  | -  |
| 0 SEH1         | YGL100W        | -1 | -1 | -1 |
| 0 SEL1         | YML013W        | 1  | -  | -  |
| 0 SEN15        | YMR059W        | -1 | -  | -  |
| 0 SEN2         | YLR105C        | -1 | -1 | -1 |
| 0 SEN34        | YAR008W        | -  | -1 | -1 |



|   |              |                |    |    |    |
|---|--------------|----------------|----|----|----|
| 1 | <b>SEN54</b> | <b>YPL083C</b> | -  | -1 | -1 |
| 0 | SEO1         | YAL067C        | 1  | 1  | -  |
| 0 | SER1         | YOR184W        | 1  | -1 | -  |
| 0 | SER2         | YGR208W        | 1  | -1 | -1 |
| 0 | SER3         | YER081W        | 1  | -  | -  |
| 0 | SER33        | YIL074C        | -1 | -  | -  |
| 0 | SES1         | YDR023W        | -  | -1 | -1 |
| 1 | <b>SET1</b>  | <b>YHR119W</b> | -  | 1  | -  |
| 0 | SET4         | YJL105W        | 1  | -  | -  |
| 0 | SET6         | YPL165C        | -  | -  | 1  |
| 0 | SFA1         | YDL168W        | -1 | 1  | -  |
| 0 | SFB2         | YNL049C        | -  | -  | -1 |
| 0 | SFG1         | YOR315W        | -1 | -1 | -  |
| 0 | SFH1         | YLR321C        | -  | -1 | -  |
| 0 | SFL1         | YOR140W        | -1 | -  | -  |
| 0 | SFP1         | YLR403W        | -  | 1  | -  |
| 0 | SGA1         | YIL099W        | -  | 1  | 1  |
| 0 | SGD1         | YLR336C        | -1 | -  | -1 |
| 0 | SGE1         | YPR198W        | 1  | -  | -  |
| 0 | SGF11        | YPL047W        | -  | -  | -1 |
| 0 | SGF29        | YCL010C        | 1  | -  | -  |
| 0 | SGN1         | YIR001C        | -  | -  | 1  |
| 0 | SGO1         | YOR073W        | -  | -  | 1  |
| 0 | SGS1         | YMR190C        | -  | 1  | -  |
| 0 | SGT2         | YOR007C        | -  | 1  | -  |
| 0 | SHE2         | YKL130C        | -  | -  | 1  |
| 0 | SHE3         | YBR130C        | -  | -1 | -  |
| 0 | SHE9         | YDR393W        | -1 | -  | -  |
| 0 | SHM2         | YLR058C        | 1  | -  | -  |
| 0 | SHQ1         | YIL104C        | -1 | -  | -1 |
| 0 | SHR3         | YDL212W        | -  | -1 | -  |
| 0 | SHU2         | YDR078C        | -1 | -  | -  |
| 0 | SHY1         | YGR112W        | -  | 1  | 1  |
| 0 | SIA1         | YOR137C        | 1  | 1  | 1  |
| 0 | SIK1         | YLR197W        | -  | -1 | -1 |
| 0 | SIL1         | YOL031C        | -1 | -  | 1  |
| 1 | <b>SIN3</b>  | <b>YOL004W</b> | 1  | 1  | -  |
| 0 | SIP2         | YGL208W        | -  | -  | 1  |
| 0 | SIP4         | YJL089W        | 1  | 1  | 1  |
| 0 | SIR1         | YKR101W        | 1  | -  | -  |
| 0 | SIR2         | YDL042C        | -1 | -  | -  |
| 0 | SIT1         | YEL065W        | 1  | -  | -1 |
| 0 | SKI8         | YGL213C        | -1 | -1 | -1 |
| 0 | SKS1         | YPL026C        | 1  | -  | 1  |
| 0 | SLA1         | YBL007C        | 1  | -  | -  |
| 1 | <b>SLA2</b>  | <b>YNL243W</b> | 1  | -  | -  |
| 0 | SLD5         | YDR489W        | -1 | -  | -  |
| 0 | SLF1         | YDR515W        | 1  | -  | 1  |
| 0 | SLI1         | YGR212W        | 1  | -  | -  |
| 0 | SLM3         | YDL033C        | -  | -  | -1 |

|               |                  |    |    |    |
|---------------|------------------|----|----|----|
| 0 SLM4        | YBR077C          | 1  | -  | -  |
| 0 SLM5        | YCR024C          | -  | 1  | 1  |
| 0 SLP1        | YOR154W          | -1 | -  | -1 |
| 0 SLT2        | YHR030C          | 1  | -  | -  |
| 0 SLX4        | YLR135W          | -  | -  | 1  |
| 0 SLX9        | YGR081C          | -1 | -  | -  |
| 0 SMC4        | YLR086W          | 1  | -  | -  |
| 0 SMD1        | YGR074W          | -1 | -  | -1 |
| 0 SMD3        | YLR147C          | -  | -  | -1 |
| 0 SMF1        | YOL122C          | -  | 1  | -  |
| 0 SMF3        | YLR034C          | 1  | -  | 1  |
| 0 SMK1        | YPR054W          | -  | 1  | -1 |
| 0 SMM1        | YNR015W          | -1 | -  | -1 |
| 0 SMP1        | YBR182C          | 1  | -  | -  |
| 0 SMX2        | YFL017W-A        | -  | 1  | -  |
| 0 SMY1        | YKL079W          | -  | 1  | -  |
| 0 SMY2        | YBR172C          | -1 | -  | -  |
| 0 SNA2        | YDR525W-A        | 1  | -  | 1  |
| 0 SNA3        | YJL151C          | 1  | 1  | 1  |
| 0 SNA4        | YDL123W          | 1  | -  | -  |
| 0 SNC1        | YAL030W          | -  | 1  | -  |
| 1 <b>SNC2</b> | <b>YOR327C</b>   | 1  | -  | -  |
| 0 SNF11       | YDR073W          | 1  | -  | -1 |
| 0 SNF12       | YNR023W          | -1 | -  | -  |
| 0 SNF2        | YOR290C          | -  | 1  | -  |
| 0 SNF3        | YDL194W          | -  | -  | 1  |
| 1 <b>SNF7</b> | <b>YLR025W</b>   | 1  | -  | -  |
| 0 SNM1        | YDR478W          | -  | 1  | -1 |
| 0 SNO1        | YMR095C          | 1  | -  | 1  |
| 0 SNO2        | YNL334C          | 1  | -  | -  |
| 0 SNO3        | YFL060C          | 1  | -  | -  |
| 0 SNQ2        | YDR011W          | -  | -  | -1 |
| 0 SNU13       | YEL026W          | -  | -  | -1 |
| 0 SNU56       | YDR240C          | -1 | -  | -  |
| 0 SNX4        | YJL036W          | -  | -1 | -  |
| 0 SNX41       | YDR425W          | 1  | 1  | -  |
| 0 SNZ1        | YMR096W          | 1  | -  | 1  |
| 0 SOD2        | YHR008C          | 1  | 1  | 1  |
| 0 SOF1        | YLL011W          | -1 | -  | -1 |
| 1 <b>SOH1</b> | <b>YGL127C</b>   | -1 | -  | -  |
| 0 SOK1        | YDR006C          | -  | 1  | -  |
| 0 SOK2        | YMR016C          | -  | -  | -1 |
| 1 <b>SOL2</b> | <b>YCR073W-A</b> | -  | 1  | 1  |
| 0 SOL3        | YHR163W          | -  | -  | -1 |
| 0 SOL4        | YGR248W          | 1  | 1  | 1  |
| 0 SOM1        | YEL059C-A        | 1  | 1  | 1  |
| 0 SPA2        | YLL021W          | 1  | -  | -  |
| 0 SPC1        | YJR010C-A        | -  | -1 | -  |
| 0 SPC105      | YGL093W          | -  | 1  | -  |
| 0 SPC29       | YPL124W          | -1 | -  | -  |

|               |                |    |    |    |
|---------------|----------------|----|----|----|
| 0 SPE1        | YKL184W        | -  | -1 | -1 |
| 0 SPE2        | YOL052C        | -1 | -  | -1 |
| 0 SPE3        | YPR069C        | -  | -  | -1 |
| 0 SPE4        | YLR146C        | -1 | -1 | -1 |
| 0 SPG5        | YMR191W        | -  | 1  | 1  |
| 0 SPI1        | YER150W        | -  | 1  | 1  |
| 0 SPL2        | YHR136C        | -1 | -1 | -  |
| 1 <b>SPN1</b> | <b>YPR133C</b> | -1 | -  | -  |
| 0 SPO1        | YNL012W        | 1  | -  | -1 |
| 0 SPO12       | YHR152W        | 1  | -1 | -  |
| 0 SPO14       | YKR031C        | 1  | -  | -  |
| 0 SPO16       | YHR153C        | 1  | -  | -  |
| 0 SPO20       | YMR017W        | 1  | -  | -  |
| 0 SPO22       | YIL073C        | 1  | 1  | -  |
| 0 SPO23       | YBR250W        | -  | 1  | -  |
| 0 SPO7        | YAL009W        | -  | -  | -1 |
| 0 SPO74       | YGL170C        | -  | 1  | -  |
| 0 SPR3        | YGR059W        | 1  | 1  | -  |
| 0 SPS19       | YNL202W        | -  | 1  | -  |
| 0 SPS4        | YOR313C        | -  | -1 | -  |
| 0 SPT5        | YML010W        | -  | -1 | -1 |
| 0 SQT1        | YIR012W        | -  | -  | -1 |
| 1 <b>SRB5</b> | <b>YGR104C</b> | -1 | -  | -  |
| 0 SRB6        | YBR253W        | 1  | -  | -  |
| 0 SRD1        | YCR018C        | -  | 1  | 1  |
| 0 SRF1        | YDL133W        | -1 | -1 | -  |
| 0 SRL1        | YOR247W        | -  | -1 | 1  |
| 0 SRL2        | YLR082C        | -  | -1 | -  |
| 0 SRL3        | YKR091W        | 1  | 1  | 1  |
| 0 SRM1        | YGL097W        | -  | -  | -1 |
| 0 SRO77       | YBL106C        | 1  | -  | -1 |
| 0 SRP101      | YDR292C        | -  | -1 | -1 |
| 0 SRP102      | YKL154W        | -  | -1 | -  |
| 0 SRP14       | YDL092W        | -  | -1 | -  |
| 0 SRP21       | YKL122C        | -  | -1 | -  |
| 0 SRP40       | YKR092C        | -  | -  | -1 |
| 0 SRP54       | YPR088C        | -  | -  | -1 |
| 0 SRP72       | YPL210C        | -  | -1 | -  |
| 0 SRT1        | YMR101C        | 1  | 1  | -  |
| 0 SRV2        | YNL138W        | 1  | -  | -  |
| 0 SRX1        | YKL086W        | 1  | 1  | 1  |
| 0 SRY1        | YKL218C        | 1  | 1  | -  |
| 0 SSA1        | YAL005C        | 1  | 1  | 1  |
| 0 SSA4        | YER103W        | -  | 1  | 1  |
| 0 SSC1        | YJR045C        | -  | 1  | -  |
| 0 SSD1        | YDR293C        | 1  | 1  | 1  |
| 0 SSE2        | YBR169C        | 1  | 1  | 1  |
| 0 SSF1        | YHR066W        | -  | -  | -1 |
| 0 SSF2        | YDR312W        | -  | -  | -1 |
| 0 SSH4        | YKL124W        | -  | -  | 1  |

|               |                |    |    |    |
|---------------|----------------|----|----|----|
| 0 SSK2        | YNR031C        | -  | -  | 1  |
| 0 SSK22       | YCR073C        | 1  | 1  | -  |
| 1 <b>SSN3</b> | <b>YPL042C</b> | -1 | -  | -  |
| 0 SSO2        | YMR183C        | -  | -1 | -1 |
| 0 SST2        | YLR452C        | -1 | -1 | -1 |
| 0 SSU1        | YPL092W        | 1  | 1  | 1  |
| 0 SSU72       | YNL222W        | -1 | -  | -  |
| 0 SSZ1        | YHR064C        | -  | -  | -1 |
| 0 STB2        | YMR053C        | 1  | 1  | 1  |
| 0 STB3        | YDR169C        | 1  | 1  | 1  |
| 0 STB5        | YHR178W        | 1  | -  | -  |
| 0 STB6        | YKL072W        | 1  | -  | -  |
| 0 STE12       | YHR084W        | -  | -1 | -  |
| 0 STE18       | YJR086W        | -  | -  | 1  |
| 0 STE2        | YFL026W        | -1 | -1 | -  |
| 0 STE23       | YLR389C        | -  | -  | 1  |
| 0 STE3        | YKL178C        | 1  | 1  | 1  |
| 0 STE4        | YOR212W        | -1 | -1 | -1 |
| 0 STE5        | YDR103W        | -  | 1  | -  |
| 0 STE50       | YCL032W        | -  | -1 | -1 |
| 0 STE6        | YKL209C        | -1 | -1 | -  |
| 0 STF1        | YDL130W-A      | 1  | 1  | 1  |
| 0 STF2        | YGR008C        | 1  | 1  | 1  |
| 0 STI1        | YOR027W        | -  | 1  | -  |
| 1 <b>STN1</b> | <b>YDR082W</b> | 1  | -  | -  |
| 0 STP2        | YHR006W        | 1  | 1  | -  |
| 0 STP3        | YLR375W        | 1  | 1  | -  |
| 0 STP4        | YDL048C        | -  | 1  | 1  |
| 0 STR3        | YGL184C        | -  | 1  | -  |
| 0 STT3        | YGL022W        | 1  | -  | -  |
| 0 STT4        | YLR305C        | -  | 1  | -  |
| 0 STU1        | YBL034C        | -  | 1  | -  |
| 1 <b>SUA5</b> | <b>YGL169W</b> | -1 | -  | -1 |
| 0 SUB1        | YMR039C        | -  | -1 | -  |
| 0 SUC2        | YIL162W        | 1  | -  | -  |
| 0 SUI1        | YNL244C        | -1 | -  | -  |
| 0 SUI2        | YJR007W        | -  | -1 | -1 |
| 0 SUI3        | YPL237W        | -  | -1 | -  |
| 0 SUP45       | YBR143C        | -  | -1 | -1 |
| 1 <b>SUR4</b> | <b>YLR372W</b> | -  | -1 | -  |
| 0 SUS1        | YBR111W-A      | -  | -  | 1  |
| 0 SUT1        | YGL162W        | -1 | -1 | -1 |
| 0 SUT2        | YPR009W        | 1  | -  | -1 |
| 0 SUV3        | YPL029W        | -  | 1  | -  |
| 0 SVF1        | YDR346C        | -  | -1 | -1 |
| 0 SVS1        | YPL163C        | -1 | -  | -  |
| 1 <b>SWD1</b> | <b>YAR003W</b> | -1 | -1 | -  |
| 0 SWD2        | YKL018W        | -1 | -  | -  |
| 1 <b>SWD3</b> | <b>YBR175W</b> | -1 | -  | -  |
| 0 SWH1        | YAR042W        | 1  | 1  | -  |

|               |                |    |    |    |
|---------------|----------------|----|----|----|
| 0 SWI1        | YPL016W        | 1  | -  | -  |
| 0 SWI4        | YER111C        | 1  | 1  | 1  |
| 0 SWM1        | YDR260C        | -  | -1 | -  |
| 0 SWM2        | YNR004W        | -  | -  | 1  |
| 0 SWS2        | YNL081C        | -  | -  | 1  |
| 0 SWT1        | YOR166C        | -  | -  | -1 |
| 0 SWT21       | YNL187W        | -  | 1  | -  |
| 0 SYF1        | YDR416W        | -1 | -  | -1 |
| 0 SYF2        | YGR129W        | 1  | -  | -  |
| 0 SYG1        | YIL047C        | -  | 1  | -  |
| 0 SYG1        | YIL047C-A      | -  | 1  | -  |
| 0 SYM1        | YLR251W        | 1  | 1  | 1  |
| 0 SYP1        | YCR030C        | -  | -  | 1  |
| 0 SYS1        | YJL004C        | -  | -1 | -  |
| 0 TAD2        | YJL035C        | -1 | -  | -  |
| 0 TAD3        | YLR316C        | -  | -  | -1 |
| 0 TAF12       | YDR145W        | -  | -1 | -  |
| 0 TAF13       | YML098W        | -  | -  | -1 |
| 0 TAF14       | YPL129W        | -  | -1 | -  |
| 0 TAF9        | YMR236W        | -1 | -  | -  |
| 0 TAH1        | YCR060W        | 1  | 1  | -  |
| 0 TAH11       | YJR046W        | -1 | -  | -1 |
| 0 TAH18       | YPR048W        | -  | -  | -1 |
| 0 TAN1        | YGL232W        | -  | -1 | -1 |
| 0 TAT1        | YBR069C        | -1 | -  | -  |
| 0 TAZ1        | YPR140W        | -  | -  | 1  |
| 0 TCA17       | YEL048C        | -1 | -  | -1 |
| 0 TCB1        | YOR086C        | 1  | -  | 1  |
| 0 TCB2        | YNL087W        | -  | -1 | -1 |
| 0 TCB3        | YML072C        | -  | -  | 1  |
| 0 TCM10       | YDR350C        | 1  | 1  | -  |
| 0 TDA1        | YMR291W        | 1  | -  | -  |
| 0 TDA10       | YGR205W        | -  | -  | 1  |
| 0 TDA11       | YHR159W        | 1  | -  | -  |
| 0 TDA2        | YER071C        | 1  | -  | -  |
| 0 TDA3        | YHR009C        | 1  | 1  | 1  |
| 0 TDA4        | YJR116W        | 1  | -  | -  |
| 0 TDA6        | YPR157W        | 1  | -  | -  |
| 0 TDA7        | YNL176C        | 1  | -  | -  |
| 0 TDA9        | YML081W        | -1 | -  | -  |
| 0 TDH1        | YJL052W        | 1  | 1  | 1  |
| 0 TEA1        | YOR337W        | -  | -  | -1 |
| 0 TEC1        | YBR083W        | -1 | -  | -  |
| 1 <b>TEL2</b> | <b>YGR099W</b> | -1 | -  | -  |
| 0 TEM1        | YML064C        | -1 | -1 | -  |
| 1 <b>TEN1</b> | <b>YLR010C</b> | -  | -  | 1  |
| 0 TFB1        | YDR311W        | -  | 1  | -  |
| 0 TFB2        | YPL122C        | -1 | -  | -  |
| 0 TFB3        | YDR460W        | -1 | -  | -  |
| 0 TFB4        | YPR056W        | -1 | -1 | -  |

|                |                |    |    |    |
|----------------|----------------|----|----|----|
| 0 TFC1         | YBR123C        | -1 | -1 | -  |
| 0 TFG2         | YGR005C        | -  | -1 | -1 |
| 0 TFS1         | YLR178C        | 1  | 1  | 1  |
| 0 TGL1         | YKL140W        | -  | -  | 1  |
| 0 TGL2         | YDR058C        | 1  | 1  | 1  |
| 0 TGL3         | YMR313C        | -  | -  | 1  |
| 0 TGL5         | YOR081C        | -  | -  | 1  |
| 1 <b>TGS1</b>  | <b>YPL157W</b> | -  | -  | -1 |
| 0 THG1         | YGR024C        | -1 | -  | -  |
| 0 THI11        | YJR156C        | 1  | 1  | 1  |
| 0 THI12        | YNL332W        | 1  | 1  | 1  |
| 0 THI13        | YDL244W        | 1  | 1  | 1  |
| 0 THI2         | YBR240C        | 1  | 1  | 1  |
| 0 THI20        | YOL055C        | 1  | 1  | -  |
| 0 THI5         | YFL058W        | 1  | 1  | 1  |
| 0 THI6         | YPL214C        | 1  | 1  | -  |
| 0 THI7         | YLR237W        | 1  | 1  | 1  |
| 0 THI80        | YOR143C        | -1 | -1 | -  |
| 0 THO1         | YER063W        | 1  | -1 | 1  |
| 1 <b>THP2</b>  | <b>YHR167W</b> | -1 | -  | -  |
| 0 THP3         | YPR045C        | -  | 1  | -  |
| 0 THS1         | YIL078W        | -  | -1 | -1 |
| 0 TIF3         | YPR163C        | -  | -1 | -1 |
| 0 TIF34        | YMR146C        | -  | -1 | -1 |
| 0 TIF35        | YDR429C        | -  | -1 | -1 |
| 0 TIF4631      | YGR162W        | -  | -1 | -1 |
| 0 TIF5         | YPR041W        | -  | -1 | -1 |
| 0 TIF6         | YPR016C        | -1 | -1 | -1 |
| 0 TIM18        | YOR297C        | -1 | -  | -  |
| 0 TIM21        | YGR033C        | -1 | -1 | -  |
| 0 TIM8         | YJR135W-A      | -  | 1  | -  |
| 0 TIM9         | YEL020W-A      | -  | 1  | -  |
| 0 TIP1         | YBR067C        | -  | 1  | 1  |
| 0 TIP41        | YPR040W        | -  | -  | 1  |
| 0 TIR1         | YER011W        | 1  | 1  | 1  |
| 0 TIR2         | YOR010C        | 1  | -  | 1  |
| 0 TIR3         | YIL011W        | 1  | -1 | -  |
| 0 TIR4         | YOR009W        | 1  | 1  | 1  |
| 0 TIS11        | YLR136C        | 1  | -  | -  |
| 0 TLG2         | YOL018C        | -  | -1 | -  |
| 0 TMA10        | YLR327C        | 1  | 1  | 1  |
| 0 TMA16        | YOR252W        | -1 | -  | -1 |
| 0 TMA17        | YDL110C        | 1  | 1  | 1  |
| 0 TMA22        | YJR014W        | -  | -1 | -1 |
| 1 <b>TMA23</b> | <b>YMR269W</b> | -  | -  | -1 |
| 0 TMA46        | YOR091W        | -  | -  | -1 |
| 0 TMA64        | YDR117C        | -1 | -1 | -  |
| 0 TMT1         | YER175C        | 1  | -  | -  |
| 0 TNA1         | YGR260W        | -  | 1  | -  |
| 0 TOD6         | YBL054W        | -1 | -  | -1 |

|                |                |    |    |    |
|----------------|----------------|----|----|----|
| 0 TOF2         | YKR010C        | -  | -  | 1  |
| 0 TOM7         | YNL070W        | -  | 1  | -  |
| 0 TOP2         | YNL088W        | 1  | -  | -  |
| 0 TOS1         | YBR162C        | -  | -1 | -  |
| 0 TOS2         | YGR221C        | -1 | -1 | 1  |
| 0 TOS4         | YLR183C        | -  | -1 | -  |
| 0 TOS6         | YNL300W        | -1 | -  | -  |
| 0 TPA1         | YER049W        | -  | -  | -1 |
| 0 TPC1         | YGR096W        | -1 | -1 | -  |
| 0 TPK1         | YJL164C        | 1  | -  | 1  |
| 0 TPK2         | YPL203W        | -  | -  | 1  |
| 0 TPK3         | YKL166C        | -  | -1 | -1 |
| 0 TPM1         | YNL079C        | -  | -  | 1  |
| 0 TPM2         | YIL138C        | 1  | -  | -  |
| 0 TPO1         | YLL028W        | 1  | 1  | 1  |
| 0 TPO2         | YGR138C        | -  | 1  | 1  |
| 0 TPO3         | YPR156C        | 1  | 1  | 1  |
| 0 TPO4         | YOR273C        | -  | 1  | -  |
| 0 TPS1         | YBR126C        | -  | 1  | 1  |
| 0 TPS2         | YDR074W        | -  | 1  | 1  |
| 0 TPS3         | YMR261C        | 1  | 1  | 1  |
| 0 TPT1         | YOL102C        | -  | -1 | -  |
| 0 TRA1         | YHR099W        | 1  | 1  | -  |
| 0 TRE1         | YPL176C        | 1  | 1  | -  |
| 0 TRF5         | YNL299W        | -  | -  | -1 |
| 0 TRI1         | YMR233W        | -  | -1 | -  |
| 1 <b>TRK1</b>  | <b>YJL129C</b> | -  | -  | 1  |
| 0 TRM1         | YDR120C        | -  | -1 | -1 |
| 0 TRM10        | YOL093W        | -1 | -1 | -1 |
| 0 TRM11        | YOL124C        | -  | -  | -1 |
| 0 TRM112       | YNR046W        | -1 | -  | -1 |
| 0 TRM12        | YML005W        | -  | -  | -1 |
| 0 TRM13        | YOL125W        | -  | -  | -1 |
| 0 TRM2         | YKR056W        | -1 | -  | -1 |
| 0 TRM3         | YDL112W        | -  | -  | -1 |
| 0 TRM44        | YPL030W        | -1 | -  | -1 |
| 1 <b>TRM5</b>  | <b>YHR070W</b> | -1 | -  | -1 |
| 0 TRM7         | YBR061C        | -1 | -1 | -1 |
| 0 TRM8         | YDL201W        | -1 | -1 | -1 |
| 0 TRM82        | YDR165W        | -1 | -  | -1 |
| 0 TRM9         | YML014W        | -  | -  | -1 |
| 0 TRP2         | YER090W        | -  | -  | -1 |
| 0 TRP3         | YKL211C        | -  | -  | -1 |
| 0 TRR1         | YDR353W        | -  | -  | -1 |
| 0 TRR2         | YHR106W        | -1 | -  | -  |
| 1 <b>TRS20</b> | <b>YBR254C</b> | -1 | -  | -  |
| 0 TRS31        | YDR472W        | -1 | -  | -1 |
| 0 TRS33        | YOR115C        | -1 | -  | -  |
| 0 TRX3         | YCR083W        | -  | 1  | -  |
| 0 TRZ1         | YKR079C        | -  | -  | -1 |

|               |                |    |    |    |
|---------------|----------------|----|----|----|
| 0 TSA2        | YDR453C        | 1  | 1  | -  |
| 0 TSC10       | YBR265W        | -1 | -  | -  |
| 0 TSL1        | YML100W        | 1  | 1  | 1  |
| 1 <b>TSR1</b> | <b>YDL060W</b> | -1 | -  | -1 |
| 0 TSR2        | YLR435W        | -1 | -1 | -1 |
| 0 TSR3        | YOR006C        | -1 | -1 | -1 |
| 0 TSR4        | YOL022C        | -1 | -1 | -1 |
| 0 TTI1        | YKL033W        | -  | -  | -1 |
| 0 TTI2        | YJR136C        | -1 | -  | -  |
| 0 TUF1        | YOR187W        | -  | 1  | 1  |
| 0 TUM1        | YOR251C        | -1 | -  | -  |
| 0 TUS1        | YLR425W        | -  | 1  | -  |
| 0 TVP15       | YDR100W        | -  | -  | 1  |
| 0 TYE7        | YOR344C        | -1 | -  | -  |
| 0 TYR1        | YBR166C        | -  | -1 | -  |
| 0 TYW1        | YPL207W        | -  | -1 | -1 |
| 0 TYW3        | YGL050W        | -1 | -  | -1 |
| 0 UBA1        | YKL210W        | 1  | -  | -  |
| 0 UBC4        | YBR082C        | -  | -  | 1  |
| 0 UBC5        | YDR059C        | -  | 1  | 1  |
| 0 UBC8        | YEL012W        | 1  | 1  | 1  |
| 0 UBC9        | YDL064W        | -1 | -  | -  |
| 0 UBI4        | YLL039C        | 1  | 1  | 1  |
| 0 UBP11       | YKR098C        | 1  | 1  | -  |
| 0 UBP14       | YBR058C        | 1  | -  | -  |
| 0 UBP15       | YMR304W        | 1  | 1  | -  |
| 0 UBP16       | YPL072W        | 1  | 1  | 1  |
| 0 UBP2        | YOR124C        | 1  | 1  | 1  |
| 0 UBP5        | YER144C        | 1  | 1  | -  |
| 0 UBP8        | YMR223W        | -1 | -  | -  |
| 0 UBR1        | YGR184C        | -  | 1  | -  |
| 0 UBS1        | YBR165W        | -1 | -  | -  |
| 0 UBX3        | YDL091C        | 1  | -  | -  |
| 0 UBX6        | YJL048C        | -  | 1  | 1  |
| 0 UFD2        | YDL190C        | 1  | -  | -  |
| 0 UFE1        | YOR075W        | -  | -1 | -  |
| 0 UGA1        | YGR019W        | 1  | 1  | -  |
| 0 UGA2        | YBR006W        | 1  | 1  | 1  |
| 0 UGP1        | YKL035W        | -  | -  | 1  |
| 0 UGX2        | YDL169C        | 1  | 1  | 1  |
| 0 UIP3        | YAR027W        | 1  | -  | 1  |
| 0 UIP4        | YPL186C        | 1  | 1  | 1  |
| 0 UIP5        | YKR044W        | -  | -  | -1 |
| 0 UME1        | YPL139C        | -1 | -  | -  |
| 0 UME6        | YDR207C        | -  | -  | -1 |
| 0 UPC2        | YDR213W        | 1  | -  | -  |
| 0 UPS1        | YLR193C        | -  | -  | 1  |
| 0 UPS2        | YLR168C        | -  | -  | 1  |
| 0 UPS3        | YDR185C        | -1 | -1 | -  |
| 0 URA10       | YMR271C        | -  | -  | 1  |



|               |                |    |    |    |
|---------------|----------------|----|----|----|
| 0 URA4        | YLR420W        | -  | -1 | -  |
| 0 URA5        | YML106W        | -  | -1 | -  |
| 0 URA6        | YKL024C        | -1 | -  | -  |
| 0 URA7        | YBL039C        | -1 | -1 | -1 |
| 0 URA8        | YJR103W        | -  | 1  | -  |
| 0 URB1        | YKL014C        | -  | -  | -1 |
| 0 URB2        | YJR041C        | -  | -  | -1 |
| 1 <b>URE2</b> | <b>YNL229C</b> | -  | -1 | -  |
| 0 URK1        | YNR012W        | -  | -  | -1 |
| 0 URM1        | YIL008W        | -  | -  | -1 |
| 0 USB1        | YLR132C        | 1  | -  | -  |
| 0 USE1        | YGL098W        | -  | -1 | -  |
| 0 USO1        | YDL058W        | 1  | -  | -  |
| 0 UTP11       | YKL099C        | -  | -  | -1 |
| 0 UTP13       | YLR222C        | -  | -  | -1 |
| 0 UTP15       | YMR093W        | -1 | -  | -1 |
| 0 UTP18       | YJL069C        | -1 | -  | -1 |
| 0 UTP20       | YBL004W        | -  | -  | -1 |
| 0 UTP21       | YLR409C        | -1 | -  | -1 |
| 0 UTP22       | YGR090W        | -1 | -  | -  |
| 0 UTP23       | YOR004W        | -1 | -1 | -1 |
| 0 UTP25       | YIL091C        | -1 | -  | -1 |
| 0 UTP30       | YKR060W        | -1 | -  | -1 |
| 0 UTP4        | YDR324C        | -  | -  | -1 |
| 0 UTP5        | YDR398W        | -1 | -  | -1 |
| 0 UTP6        | YDR449C        | -1 | -  | -1 |
| 0 UTP7        | YER082C        | -  | -  | -1 |
| 0 UTP8        | YGR128C        | -1 | -  | -1 |
| 0 UTP9        | YHR196W        | -1 | -  | -1 |
| 0 UTR2        | YEL040W        | -  | -1 | -1 |
| 0 UTR4        | YEL038W        | -  | -  | -1 |
| 0 VAC17       | YCL063W        | -  | -1 | -  |
| 0 VAM3        | YOR106W        | -  | -1 | -1 |
| 1 <b>VAM6</b> | <b>YDL077C</b> | -  | 1  | -  |
| 0 VBA1        | YMR088C        | 1  | 1  | -  |
| 0 VBA2        | YBR293W        | 1  | -  | -  |
| 0 VCX1        | YDL128W        | -1 | -  | -1 |
| 0 VEL1        | YGL258W        | -1 | -  | -1 |
| 0 VFA1        | YER128W        | 1  | -  | -  |
| 0 VHR1        | YIL056W        | 1  | 1  | 1  |
| 0 VHS3        | YOR054C        | -  | -  | 1  |
| 1 <b>VHT1</b> | <b>YGR065C</b> | -  | -  | -1 |
| 0 VID24       | YBR105C        | 1  | 1  | 1  |
| 0 VID28       | YIL017C        | 1  | -  | 1  |
| 0 VID30       | YGL227W        | 1  | 1  | 1  |
| 0 VIP1        | YLR410W        | -  | 1  | -  |
| 0 VMA10       | YHR039C-A      | -  | -  | 1  |
| 0 VMR1        | YHL035C        | 1  | -  | -  |
| 0 VPH2        | YKL119C        | -  | -1 | -  |
| 0 VPS24       | YKL041W        | -  | -1 | -  |

|           |         |    |    |    |
|-----------|---------|----|----|----|
| 1 VPS28   | YPL065W | -  | -  | 1  |
| 1 VPS3    | YDR495C | 1  | -  | -  |
| 1 VPS34   | YLR240W | -  | 1  | -  |
| 0 VPS45   | YGL095C | 1  | -  | -  |
| 0 VPS51   | YKR020W | 1  | -  | -  |
| 0 VPS55   | YJR044C | -  | -  | 1  |
| 0 VPS60   | YDR486C | -  | -1 | -  |
| 0 VPS62   | YGR141W | 1  | -  | -1 |
| 0 VPS64   | YDR200C | 1  | -  | -  |
| 0 VPS66   | YPR139C | -  | -1 | -  |
| 0 VPS71   | YML041C | -1 | -  | -  |
| 0 VPS73   | YGL104C | 1  | -  | 1  |
| 0 VPS74   | YDR372C | -  | -1 | -  |
| 1 VPS75   | YNL246W | -1 | -1 | -  |
| 0 VPS8    | YAL002W | -  | 1  | 1  |
| 1 VPS9    | YML097C | -1 | -  | -  |
| 1 VRP1    | YLR337C | 1  | 1  | -  |
| 0 VTA1    | YLR181C | -  | -1 | -1 |
| 0 VTC1    | YER072W | -1 | -  | -  |
| 0 VTC2    | YFL004W | -1 | -1 | -  |
| 0 VTC3    | YPL019C | -1 | -1 | -  |
| 0 VTC4    | YJL012C | -1 | -1 | -  |
| 0 VTS1    | YOR359W | -1 | -  | -1 |
| 0 WRS1    | YOL097C | -  | -1 | -1 |
| 0 WSC3    | YOL105C | -  | -1 | -  |
| 0 WSC4    | YHL028W | -1 | -  | 1  |
| 0 WTM1    | YOR230W | 1  | 1  | 1  |
| 0 WTM2    | YOR229W | 1  | -  | -  |
| 0 WWM1    | YFL010C | -  | 1  | -  |
| 0 XBP1    | YIL101C | 1  | 1  | -  |
| 0 XKS1    | YGR194C | -  | -  | 1  |
| 0 XPT1    | YJR133W | -  | 1  | -  |
| 0 XYL2    | YLR070C | -  | -  | -1 |
| 0 YAK1    | YJL141C | 1  | 1  | 1  |
| 0 YAP1    | YML007W | 1  | -  | -  |
| 0 YAP1801 | YHR161C | 1  | 1  | 1  |
| 0 YAP6    | YDR259C | 1  | -  | -  |
| 0 YAR1    | YPL239W | -  | -  | -1 |
| 0 YAT1    | YAR035W | 1  | 1  | -  |
| 0 YAT2    | YER024W | 1  | -  | -  |
| 0 YCK1    | YHR135C | 1  | -1 | -  |
| 0 YCT1    | YLL055W | 1  | -  | 1  |
| 0 YDC1    | YPL087W | 1  | 1  | 1  |
| 1 YDJ1    | YNL064C | -1 | -  | -1 |
| 0 YEA4    | YEL004W | 1  | -  | -  |
| 0 YEA6    | YEL006W | -1 | -  | -  |
| 0 YEF1    | YEL041W | 1  | 1  | -  |
| 0 YEH1    | YLL012W | 1  | -  | -1 |
| 0 YET1    | YKL065C | 1  | -  | 1  |
| 0 YET2    | YMR040W | -  | 1  | -  |

|                |                |    |    |    |
|----------------|----------------|----|----|----|
| 0 YET3         | YDL072C        | 1  | -  | -  |
| 0 YFH7         | YFR007W        | -  | 1  | -  |
| 0 YGK3         | YOL128C        | -1 | -  | -1 |
| 0 YGP1         | YNL160W        | 1  | 1  | 1  |
| 0 YHK8         | YHR048W        | -  | 1  | -  |
| 0 YHP1         | YDR451C        | -  | -  | 1  |
| <b>1 YKU70</b> | <b>YMR284W</b> | 1  | -  | -  |
| 0 YLH47        | YPR125W        | -1 | -  | -  |
| 0 YMC1         | YPR058W        | -  | -  | -1 |
| 0 YMC2         | YBR104W        | -  | -1 | -1 |
| 0 YMD8         | YML038C        | -  | -1 | -  |
| 0 YME1         | YPR024W        | 1  | 1  | -  |
| 0 YME2         | YMR302C        | -  | 1  | 1  |
| 0 YML6         | YML025C        | -  | -  | 1  |
| 0 YND1         | YER005W        | -1 | -  | -  |
| 0 YNK1         | YKL067W        | 1  | -  | -  |
| 0 YOS9         | YDR057W        | 1  | 1  | -  |
| 0 YOX1         | YML027W        | -  | -  | 1  |
| 0 YPC1         | YBR183W        | -  | -  | 1  |
| 0 YPK2         | YMR104C        | 1  | 1  | -  |
| 0 YPK3         | YBR028C        | -1 | -1 | -  |
| 0 YPK9         | YOR291W        | -  | -  | 1  |
| 0 YPS1         | YLR120C        | 1  | 1  | -  |
| 0 YPS3         | YLR121C        | 1  | 1  | 1  |
| 0 YPS6         | YIR039C        | 1  | 1  | 1  |
| 0 YPT10        | YBR264C        | -1 | -  | -  |
| 0 YPT31        | YER031C        | -  | -1 | -  |
| 0 YPT32        | YGL210W        | -  | -1 | -  |
| 0 YPT52        | YKR014C        | -  | -1 | -  |
| 0 YPT53        | YNL093W        | 1  | 1  | 1  |
| 0 YPT6         | YLR262C        | -  | -1 | -  |
| 0 YRA1         | YDR381W        | -  | -1 | -  |
| 0 YRF1-1       | YBL111C        | -  | -1 | -1 |
| 0 YRF1-1       | YBL113C        | -  | -1 | -1 |
| 0 YRF1-1       | YDR545W        | -  | -1 | -1 |
| 0 YRF1-2       | YBL112C        | -  | -1 | -1 |
| 0 YRF1-2       | YDR545W        | -  | -1 | -1 |
| 0 YRF1-2       | YEL076C-A      | -  | -1 | -  |
| 0 YRF1-3       | YDR545W        | -  | -1 | -1 |
| 0 YRF1-3       | YEL077C        | -  | -1 | -1 |
| 0 YRF1-3       | YER190W        | -  | -1 | -1 |
| 0 YRF1-4       | YEL077C        | -  | -1 | -1 |
| 0 YRF1-4       | YER190W        | -  | -1 | -1 |
| 0 YRF1-4       | YGR296W        | -  | -1 | -1 |
| 0 YRF1-4       | YLL066C        | -  | -1 | -1 |
| 0 YRF1-4       | YLR466W        | -  | -1 | -1 |
| 0 YRF1-5       | YER190W        | -  | -1 | -1 |
| 0 YRF1-5       | YFL064C        | -  | -  | -1 |
| 0 YRF1-5       | YFL065C        | -  | -  | -1 |
| 0 YRF1-5       | YFL066C        | -  | -1 | -  |

|               |                |    |    |    |
|---------------|----------------|----|----|----|
| 0 YRF1-5      | YGR296W        | -  | -1 | -1 |
| 0 YRF1-5      | YIL177C        | -  | -1 | -1 |
| 0 YRF1-5      | YLL067C        | -  | -1 | -1 |
| 0 YRF1-5      | YLR467W        | -  | -1 | -1 |
| 0 YRF1-6      | YGR296W        | -  | -1 | -1 |
| 0 YRF1-6      | YHL050C        | -  | -1 | -  |
| 0 YRF1-6      | YJL225C        | -  | -1 | -1 |
| 0 YRF1-6      | YNL339C        | -  | -1 | -1 |
| 0 YRF1-7      | YHL049C        | -  | -  | -1 |
| 0 YRF1-7      | YHL050C        | -  | -1 | -  |
| 0 YRF1-7      | YHR218W-A      | -  | -1 | -1 |
| 0 YRF1-7      | YHR219W        | -  | -1 | -1 |
| 0 YRF1-7      | YLR464W        | -  | -1 | -  |
| 0 YRF1-7      | YPL283C        | -  | -1 | -1 |
| 0 YRF1-8      | YOR396W        | -  | -1 | -1 |
| 0 YRO2        | YBR054W        | -  | 1  | 1  |
| 0 YSP1        | YHR155W        | -  | 1  | -  |
| 1 <b>YSP3</b> | <b>YOR003W</b> | -  | -  | -1 |
| 0 YSR3        | YKR053C        | 1  | -  | -  |
| 0 YSW1        | YBR148W        | 1  | -  | 1  |
| 0 YTA12       | YMR089C        | -  | -  | 1  |
| 1 <b>YTA7</b> | <b>YGR270W</b> | 1  | -  | -  |
| 0 YTH1        | YPR107C        | -1 | -  | -  |
| 0 YTM1        | YOR272W        | -1 | -  | -1 |
| 0 YTP1        | YNL237W        | 1  | 1  | 1  |
| 0 YUR1        | YJL139C        | -  | -  | -1 |
| 0 YVH1        | YIR026C        | -1 | -1 | -1 |
| 0 ZAP1        | YJL056C        | -  | -  | -1 |
| 0 ZDS1        | YMR273C        | -  | 1  | 1  |
| 0 ZIM17       | YNL310C        | -  | 1  | -  |
| 0 ZIP1        | YDR285W        | -  | -  | -1 |
| 0 ZPR1        | YGR211W        | -1 | -1 | -1 |
| 0 ZPS1        | YOL154W        | -1 | -  | -1 |
| 0 ZRC1        | YMR243C        | -  | -  | -1 |
| 0 ZRG8        | YER033C        | 1  | 1  | 1  |
| 0 ZRT1        | YGL255W        | -  | -1 | -1 |
| 0 ZRT2        | YLR130C        | -1 | -  | -1 |
| 0 ZTA1        | YBR046C        | 1  | -  | -  |
| 0 ZUO1        | YGR285C        | -  | -  | -1 |
| 0 -           | YAL016C-B      | -  | -  | 1  |
| 0 -           | YAL063C-A      | 1  | 1  | 1  |
| 0 -           | YAR009C        | 1  | -  | 1  |
| 0 -           | YAR010C        | 1  | -  | -  |
| 0 -           | YAR028W        | 1  | -  | 1  |
| 0 -           | YAR029W        | 1  | 1  | 1  |
| 0 -           | YAR070C        | -1 | -  | -  |
| 0 -           | YBL005W-A      | 1  | 1  | -1 |
| 0 -           | YBL005W-B      | 1  | 1  | 1  |
| 0 -           | YBL010C        | -  | -  | 1  |
| 0 -           | YBL028C        | -  | -  | -1 |

|     |           |    |    |    |
|-----|-----------|----|----|----|
| 0 - | YBL029C-A | -1 | -  | 1  |
| 0 - | YBL029W   | -  | -  | 1  |
| 0 - | YBL039W-B | 1  | -  | 1  |
| 0 - | YBL044W   | -  | -1 | -1 |
| 0 - | YBL055C   | -  | -  | -1 |
| 0 - | YBL059W   | -  | 1  | -  |
| 0 - | YBL071C-B | -  | -1 | 1  |
| 0 - | YBL081W   | -1 | -  | -  |
| 0 - | YBL100W-B | 1  | -  | 1  |
| 0 - | YBL107C   | -  | -  | 1  |
| 0 - | YBL113W-A | -  | -1 | -  |
| 0 - | YBR012W-A | 1  | -  | -  |
| 0 - | YBR012W-B | 1  | -  | 1  |
| 0 - | YBR053C   | 1  | -  | 1  |
| 0 - | YBR056W   | 1  | 1  | 1  |
| 0 - | YBR056W-A | 1  | -  | -  |
| 0 - | YBR063C   | 1  | 1  | -  |
| 0 - | YBR071W   | 1  | -  | -  |
| 0 - | YBR085C-A | 1  | 1  | -  |
| 0 - | YBR139W   | 1  | 1  | 1  |
| 0 - | YBR141C   | -1 | -  | -  |
| 0 - | YBR196C-A | -1 | -  | -  |
| 0 - | YBR219C   | -1 | -1 | -1 |
| 0 - | YBR220C   | -1 | -1 | -1 |
| 0 - | YBR225W   | -1 | -  | -  |
| 0 - | YBR230W-A | 1  | -  | 1  |
| 0 - | YBR238C   | -  | -  | -1 |
| 0 - | YBR241C   | 1  | 1  | 1  |
| 0 - | YBR242W   | -  | -1 | -1 |
| 0 - | YBR255C-A | -  | -1 | 1  |
| 0 - | YBR259W   | -  | 1  | -  |
| 0 - | YBR285W   | 1  | 1  | 1  |
| 0 - | YBR287W   | -  | 1  | -  |
| 0 - | YCL002C   | -1 | -1 | -1 |
| 0 - | YCL012C   | -  | 1  | -  |
| 0 - | YCL019W   | 1  | -  | 1  |
| 0 - | YCL021W-A | -1 | -  | -  |
| 0 - | YCL049C   | 1  | -  | 1  |
| 0 - | YCR007C   | 1  | -  | 1  |
| 0 - | YCR015C   | -1 | -  | -  |
| 0 - | YCR016W   | -  | -1 | -1 |
| 0 - | YCR043C   | -1 | -  | -  |
| 0 - | YCR051W   | -  | -1 | -1 |
| 0 - | YCR061W   | 1  | 1  | -  |
| 0 - | YCR075W-A | -  | 1  | -  |
| 0 - | YCR087C-A | -  | -  | -1 |
| 0 - | YCR090C   | -1 | -  | -  |
| 0 - | YCR099C   | 1  | -  | -  |
| 0 - | YCR100C   | 1  | -  | -  |
| 0 - | YDL027C   | 1  | -  | 1  |

|     |           |    |    |    |
|-----|-----------|----|----|----|
| 0 - | YDL063C   | -  | -  | -1 |
| 0 - | YDL085C-A | 1  | -  | -  |
| 0 - | YDL086W   | 1  | 1  | 1  |
| 0 - | YDL114W   | -  | 1  | 1  |
| 0 - | YDL121C   | -  | -1 | -1 |
| 0 - | YDL124W   | -  | 1  | -  |
| 0 - | YDL129W   | -1 | -  | -  |
| 0 - | YDL144C   | -  | -  | -1 |
| 0 - | YDL157C   | 1  | -  | -  |
| 0 - | YDL183C   | -  | 1  | 1  |
| 0 - | YDL199C   | 1  | 1  | 1  |
| 0 - | YDL241W   | -1 | -1 | -1 |
| 0 - | YDR003W-A | -  | -  | 1  |
| 0 - | YDR018C   | 1  | 1  | 1  |
| 0 - | YDR034C-D | 1  | -  | 1  |
| 0 - | YDR034W-B | 1  | 1  | 1  |
| 0 - | YDR061W   | -1 | -  | -  |
| 0 - | YDR098C-A | 1  | -  | -  |
| 0 - | YDR098C-B | 1  | -  | 1  |
| 0 - | YDR124W   | -1 | -  | -1 |
| 0 - | YDR132C   | -  | -1 | -  |
| 0 - | YDR161W   | -1 | -1 | -1 |
| 0 - | YDR170W-A | 1  | 1  | -1 |
| 0 - | YDR182W-A | -1 | -  | -  |
| 0 - | YDR186C   | 1  | -  | -  |
| 0 - | YDR210C-C | 1  | -  | -  |
| 0 - | YDR210C-D | 1  | -  | 1  |
| 0 - | YDR210W   | -  | -  | -1 |
| 0 - | YDR210W-B | 1  | -  | 1  |
| 0 - | YDR222W   | -1 | -  | -1 |
| 0 - | YDR246W-A | -1 | -1 | -  |
| 0 - | YDR248C   | 1  | -  | -  |
| 0 - | YDR249C   | -1 | -  | -  |
| 0 - | YDR261C-C | 1  | -  | -  |
| 0 - | YDR261C-D | 1  | -  | 1  |
| 0 - | YDR261W-B | 1  | -  | 1  |
| 0 - | YDR262W   | -1 | -  | 1  |
| 0 - | YDR282C   | -  | -  | -1 |
| 0 - | YDR307W   | 1  | -  | 1  |
| 0 - | YDR316W-A | 1  | -  | -  |
| 0 - | YDR316W-B | 1  | -  | 1  |
| 0 - | YDR333C   | -1 | -  | -  |
| 0 - | YDR365W-A | 1  | -  | -  |
| 0 - | YDR365W-B | 1  | -  | 1  |
| 0 - | YDR379C-A | 1  | 1  | 1  |
| 0 - | YDR381C-A | 1  | 1  | 1  |
| 0 - | YDR391C   | -1 | -  | -  |
| 0 - | YDR476C   | 1  | -  | -  |
| 0 - | YDR541C   | -  | -1 | -  |
| 0 - | YDR545C-A | -  | -1 | -  |

|     |                |    |    |    |
|-----|----------------|----|----|----|
| 0 - | YEL020C        | -  | 1  | -  |
| 0 - | YEL043W        | -  | 1  | -  |
| 0 - | YEL047C        | 1  | 1  | 1  |
| 1 - | <b>YEL057C</b> | 1  | 1  | -  |
| 0 - | YEL073C        | 1  | -  | 1  |
| 0 - | YEL077W-A      | -  | -1 | -  |
| 0 - | YER010C        | -  | -  | 1  |
| 0 - | YER034W        | 1  | 1  | -  |
| 0 - | YER053C-A      | -1 | 1  | -  |
| 0 - | YER077C        | -  | -  | -1 |
| 0 - | YER079W        | 1  | -  | 1  |
| 0 - | YER130C        | 1  | -  | -  |
| 0 - | YER137C        | -1 | 1  | -  |
| 0 - | YER137C-A      | 1  | -  | -  |
| 0 - | YER138C        | 1  | -  | 1  |
| 0 - | YER140W        | -  | -1 | -1 |
| 0 - | YER152C        | -  | 1  | -  |
| 0 - | YER156C        | -1 | -1 | -1 |
| 0 - | YER158C        | 1  | 1  | 1  |
| 0 - | YER159C-A      | 1  | -  | -  |
| 0 - | YER160C        | 1  | -  | 1  |
| 0 - | YER163C        | -  | 1  | -  |
| 0 - | YER184C        | 1  | -  | -  |
| 0 - | YER186C        | -1 | -1 | -  |
| 0 - | YER187W        | -1 | -1 | -  |
| 0 - | YER188C-A      | -  | -1 | -  |
| 0 - | YER190C-B      | -  | -1 | -  |
| 0 - | YFL002W-A      | 1  | -  | 1  |
| 0 - | YFL012W        | 1  | 1  | 1  |
| 0 - | YFL041W-A      | -  | -  | 1  |
| 0 - | YFL042C        | 1  | 1  | -  |
| 0 - | YFL054C        | 1  | 1  | -  |
| 0 - | YFL068W        | -  | -1 | -  |
| 0 - | YFR012W-A      | 1  | 1  | 1  |
| 0 - | YFR016C        | 1  | -  | 1  |
| 0 - | YFR018C        | 1  | -  | -  |
| 0 - | YFR039C        | 1  | -  | -  |
| 0 - | YGL006W-A      | 1  | -  | -  |
| 0 - | YGL010W        | -  | -  | 1  |
| 0 - | YGL036W        | 1  | 1  | -  |
| 1 - | <b>YGL039W</b> | 1  | -  | -1 |
| 0 - | YGL081W        | -  | 1  | 1  |
| 0 - | YGL101W        | -1 | -1 | -  |
| 0 - | YGL114W        | 1  | -  | -  |
| 0 - | YGL117W        | 1  | 1  | 1  |
| 0 - | YGL159W        | -  | -1 | -  |
| 0 - | YGL176C        | -1 | -  | -  |
| 0 - | YGL185C        | -  | 1  | -1 |
| 0 - | YGL230C        | -  | 1  | 1  |
| 0 - | YGL242C        | 1  | -  | -  |

|     |                |    |    |    |
|-----|----------------|----|----|----|
| 0 - | YGL258W-A      | 1  | -  | -  |
| 0 - | YGR012W        | -  | 1  | -  |
| 0 - | YGR021W        | -  | 1  | 1  |
| 0 - | YGR026W        | -  | -  | 1  |
| 0 - | YGR027W-A      | 1  | -  | -  |
| 0 - | YGR027W-B      | 1  | -  | 1  |
| 0 - | YGR035C        | -1 | -1 | -1 |
| 0 - | YGR038C-A      | 1  | -  | -  |
| 0 - | YGR038C-B      | 1  | -  | 1  |
| 1 - | <b>YGR042W</b> | -  | -  | 1  |
| 0 - | YGR045C        | 1  | -  | -  |
| 0 - | YGR053C        | 1  | -  | 1  |
| 0 - | YGR054W        | -  | -  | -1 |
| 0 - | YGR067C        | 1  | -  | -  |
| 0 - | YGR079W        | -1 | -  | -1 |
| 0 - | YGR093W        | -  | -  | -1 |
| 0 - | YGR109W-A      | -1 | -1 | -1 |
| 0 - | YGR109W-B      | -1 | -1 | -1 |
| 0 - | YGR121W-A      | -  | -  | -1 |
| 0 - | YGR122W        | -1 | -1 | -1 |
| 0 - | YGR127W        | -  | 1  | 1  |
| 0 - | YGR130C        | 1  | 1  | 1  |
| 0 - | YGR146C-A      | -1 | -  | -  |
| 0 - | YGR149W        | -  | 1  | -  |
| 0 - | YGR153W        | 1  | -  | -  |
| 0 - | YGR161C-C      | 1  | -  | -  |
| 0 - | YGR161C-D      | 1  | -  | 1  |
| 0 - | YGR161W-B      | 1  | -  | 1  |
| 0 - | YGR174W-A      | 1  | 1  | 1  |
| 0 - | YGR210C        | -1 | -  | -  |
| 0 - | YGR237C        | -  | -  | 1  |
| 0 - | YGR250C        | 1  | 1  | 1  |
| 0 - | YGR266W        | -  | -  | -1 |
| 0 - | YGR283C        | -1 | -  | -1 |
| 0 - | YGR296C-B      | -  | -1 | -  |
| 0 - | YHL009W-B      | 1  | -  | -  |
| 1 - | <b>YHL012W</b> | 1  | -  | -  |
| 0 - | YHL044W        | -  | -  | 1  |
| 0 - | YHL050W-A      | -  | -1 | -  |
| 0 - | YHR003C        | -1 | -  | -  |
| 0 - | YHR022C        | -  | 1  | -  |
| 0 - | YHR033W        | -1 | 1  | -  |
| 0 - | YHR045W        | -  | -1 | -1 |
| 0 - | YHR078W        | 1  | -  | -  |
| 0 - | YHR080C        | -  | -  | 1  |
| 0 - | YHR097C        | -  | -  | 1  |
| 0 - | YHR112C        | -  | 1  | 1  |
| 0 - | YHR122W        | -  | -  | -1 |
| 0 - | YHR127W        | -  | -1 | -  |
| 0 - | YHR138C        | 1  | 1  | 1  |



|     |                |    |    |    |
|-----|----------------|----|----|----|
| 0 - | YHR140W        | -  | 1  | 1  |
| 0 - | YHR182W        | -  | 1  | -  |
| 0 - | YHR214C-B      | 1  | -  | 1  |
| 0 - | YHR214C-C      | 1  | -  | -  |
| 0 - | YHR214C-E      | -1 | -  | -  |
| 0 - | YHR218W        | -  | -1 | -1 |
| 0 - | YHR219C-A      | -  | -1 | -  |
| 0 - | YHR219W        | -  | -1 | -1 |
| 0 - | YIL014C-A      | 1  | 1  | 1  |
| 0 - | YIL024C        | -  | -  | 1  |
| 0 - | YIL029C        | -  | -  | 1  |
| 0 - | YIL055C        | -  | 1  | -  |
| 1 - | <b>YIL077C</b> | -  | -  | 1  |
| 0 - | YIL082W        | -1 | -1 | -1 |
| 0 - | YIL082W-A      | -1 | -1 | -1 |
| 0 - | YIL096C        | -  | -  | -1 |
| 0 - | YIL108W        | 1  | 1  | 1  |
| 0 - | YIL134C-A      | -  | 1  | -  |
| 0 - | YIL169C        | -1 | -  | -1 |
| 0 - | YIL177C        | -  | -1 | -1 |
| 0 - | YIL177W-A      | -  | -1 | -  |
| 0 - | YIR007W        | 1  | 1  | 1  |
| 0 - | YIR018C-A      | 1  | -  | -  |
| 0 - | YIR024C        | -  | 1  | -  |
| 0 - | YIR035C        | -  | -  | -1 |
| 0 - | YJL016W        | 1  | 1  | 1  |
| 0 - | YJL047C-A      | -  | 1  | -  |
| 0 - | YJL052C-A      | -1 | -  | -  |
| 0 - | YJL055W        | 1  | 1  | 1  |
| 0 - | YJL070C        | 1  | 1  | -  |
| 0 - | YJL077W-B      | 1  | -  | -  |
| 0 - | YJL113W        | 1  | -  | -  |
| 0 - | YJL127C-B      | 1  | 1  | -  |
| 0 - | YJL133C-A      | 1  | 1  | 1  |
| 0 - | YJL144W        | 1  | 1  | -  |
| 0 - | YJL160C        | 1  | -  | -  |
| 0 - | YJL181W        | -1 | -  | 1  |
| 0 - | YJL185C        | 1  | -  | -  |
| 0 - | YJL193W        | -1 | -  | -  |
| 0 - | YJL213W        | 1  | -  | -  |
| 0 - | YJL218W        | 1  | -  | -1 |
| 0 - | YJL225C        | -  | -1 | -1 |
| 0 - | YJL225W-A      | -  | -1 | -  |
| 0 - | YJR003C        | -  | -1 | -  |
| 0 - | YJR005C-A      | 1  | -  | 1  |
| 0 - | YJR015W        | -1 | -1 | -1 |
| 0 - | YJR026W        | 1  | -  | -  |
| 0 - | YJR027W        | 1  | -  | 1  |
| 0 - | YJR028W        | 1  | -  | -  |
| 0 - | YJR029W        | 1  | -  | 1  |

|     |           |    |    |    |
|-----|-----------|----|----|----|
| 0 - | YJR056C   | -  | -  | 1  |
| 0 - | YJR061W   | -  | 1  | 1  |
| 0 - | YJR085C   | -  | 1  | -  |
| 0 - | YJR096W   | -  | 1  | 1  |
| 0 - | YJR098C   | -1 | -  | -  |
| 0 - | YJR111C   | -1 | -  | -  |
| 0 - | YJR114W   | -  | 1  | -  |
| 0 - | YJR115W   | -  | -  | -1 |
| 0 - | YJR124C   | -  | -  | -1 |
| 0 - | YJR129C   | -  | -  | -1 |
| 0 - | YJR141W   | -1 | -  | -  |
| 0 - | YJR149W   | 1  | -  | -  |
| 0 - | YKL023W   | 1  | -  | -  |
| 0 - | YKL027W   | -1 | -  | -  |
| 0 - | YKL068W-A | -1 | -  | -  |
| 0 - | YKL069W   | -  | 1  | -  |
| 0 - | YKL071W   | 1  | -  | -  |
| 0 - | YKL091C   | -  | 1  | 1  |
| 0 - | YKL105C   | -  | -  | 1  |
| 0 - | YKL107W   | 1  | 1  | -  |
| 0 - | YKL151C   | 1  | 1  | 1  |
| 0 - | YKL187C   | 1  | -1 | -  |
| 0 - | YKL222C   | 1  | -  | -  |
| 0 - | YKR011C   | 1  | -  | 1  |
| 0 - | YKR051W   | -  | -  | 1  |
| 0 - | YKR075C   | -  | -1 | -  |
| 0 - | YKR096W   | 1  | -  | 1  |
| 0 - | YLL053C   | 1  | -  | -1 |
| 0 - | YLL058W   | 1  | -  | -  |
| 0 - | YLL066C   | -  | -1 | -1 |
| 0 - | YLL066W-A | -  | -1 | -  |
| 0 - | YLL066W-B | -1 | -  | -  |
| 0 - | YLL067C   | -  | -1 | -1 |
| 0 - | YLL067W-A | -  | -1 | -  |
| 0 - | YLR001C   | -  | 1  | 1  |
| 0 - | YLR030W   | -  | 1  | -  |
| 0 - | YLR031W   | 1  | 1  | -  |
| 0 - | YLR035C-A | 1  | -  | 1  |
| 0 - | YLR040C   | -1 | -  | -  |
| 0 - | YLR042C   | -1 | -1 | 1  |
| 0 - | YLR050C   | 1  | 1  | -  |
| 0 - | YLR053C   | 1  | 1  | 1  |
| 0 - | YLR063W   | -1 | 1  | -1 |
| 0 - | YLR072W   | -  | 1  | -  |
| 0 - | YLR126C   | 1  | -1 | -1 |
| 0 - | YLR149C   | 1  | 1  | 1  |
| 0 - | YLR152C   | 1  | -  | -  |
| 0 - | YLR154W-E | -1 | -  | -  |
| 0 - | YLR157C-A | 1  | -  | -  |
| 0 - | YLR157C-B | 1  | -  | 1  |

|     |           |    |    |    |
|-----|-----------|----|----|----|
| 0 - | YLR173W   | 1  | 1  | -  |
| 0 - | YLR177W   | 1  | 1  | 1  |
| 0 - | YLR194C   | 1  | -  | -  |
| 0 - | YLR211C   | 1  | -  | -  |
| 0 - | YLR227W-A | 1  | -  | -  |
| 0 - | YLR227W-B | 1  | -  | 1  |
| 0 - | YLR243W   | -1 | -  | -1 |
| 0 - | YLR253W   | -1 | -  | -  |
| 0 - | YLR256W-A | 1  | -  | -  |
| 0 - | YLR278C   | 1  | 1  | 1  |
| 0 - | YLR281C   | -  | -  | 1  |
| 0 - | YLR283W   | -  | -  | 1  |
| 0 - | YLR285C-A | -1 | -  | -1 |
| 0 - | YLR287C   | -  | -  | -1 |
| 0 - | YLR290C   | -  | -  | 1  |
| 0 - | YLR297W   | -  | 1  | 1  |
| 0 - | YLR326W   | -1 | 1  | 1  |
| 0 - | YLR342W-A | -1 | -  | -  |
| 0 - | YLR345W   | 1  | -  | 1  |
| 0 - | YLR352W   | -  | 1  | -  |
| 0 - | YLR363W-A | -  | -  | -1 |
| 0 - | YLR407W   | -  | 1  | 1  |
| 0 - | YLR410W-B | 1  | -  | 1  |
| 0 - | YLR413W   | -1 | -  | -  |
| 0 - | YLR446W   | -  | 1  | 1  |
| 0 - | YLR455W   | -1 | -  | 1  |
| 0 - | YLR456W   | -  | -  | 1  |
| 0 - | YLR462W   | -  | -  | -1 |
| 0 - | YLR466C-A | -  | -1 | -  |
| 0 - | YLR466W   | -  | -1 | -1 |
| 0 - | YLR467C-A | -  | -1 | -  |
| 0 - | YLR467W   | -  | -1 | -1 |
| 0 - | YML002W   | 1  | -  | -  |
| 0 - | YML007C-A | 1  | -  | 1  |
| 0 - | YML018C   | -1 | -  | -1 |
| 0 - | YML037C   | -1 | -  | -  |
| 0 - | YML039W   | 1  | -  | 1  |
| 0 - | YML040W   | 1  | -  | -  |
| 0 - | YML045W   | 1  | -  | 1  |
| 0 - | YML045W-A | 1  | -  | -  |
| 0 - | YML083C   | 1  | -  | -  |
| 0 - | YML096W   | -1 | -1 | -1 |
| 0 - | YML108W   | -  | -  | -1 |
| 0 - | YML119W   | -  | -  | 1  |
| 0 - | YML133C   | -  | -1 | -1 |
| 0 - | YML133W-B | -  | -1 | -  |
| 0 - | YMR013W-A | -1 | 1  | -1 |
| 0 - | YMR018W   | 1  | 1  | 1  |
| 0 - | YMR034C   | 1  | 1  | -  |
| 0 - | YMR045C   | 1  | 1  | 1  |

|     |           |    |    |    |
|-----|-----------|----|----|----|
| 0 - | YMR046C   | 1  | 1  | -1 |
| 0 - | YMR050C   | 1  | -  | 1  |
| 0 - | YMR051C   | 1  | -  | -  |
| 0 - | YMR090W   | -  | 1  | 1  |
| 0 - | YMR102C   | -  | -  | -1 |
| 0 - | YMR114C   | 1  | -  | -  |
| 0 - | YMR122W-A | 1  | 1  | 1  |
| 0 - | YMR124W   | 1  | 1  | -  |
| 0 - | YMR130W   | -  | -  | -1 |
| 0 - | YMR134W   | 1  | -  | -  |
| 0 - | YMR144W   | -  | -1 | -  |
| 0 - | YMR166C   | -  | 1  | -  |
| 0 - | YMR181C   | 1  | 1  | 1  |
| 0 - | YMR185W   | -  | -  | -1 |
| 0 - | YMR196W   | 1  | 1  | 1  |
| 0 - | YMR209C   | -1 | -  | -  |
| 0 - | YMR210W   | -  | -  | 1  |
| 0 - | YMR230W-A | -1 | -  | -1 |
| 0 - | YMR244C-A | 1  | 1  | 1  |
| 0 - | YMR244W   | -  | 1  | 1  |
| 0 - | YMR252C   | 1  | -  | -  |
| 0 - | YMR265C   | -  | -  | -1 |
| 0 - | YMR272W-B | -1 | -  | -  |
| 0 - | YMR310C   | -  | -  | -1 |
| 0 - | YMR315W   | 1  | -  | -  |
| 0 - | YMR317W   | 1  | -  | -  |
| 0 - | YNL019C   | -  | -  | -1 |
| 0 - | YNL022C   | -1 | -  | -1 |
| 0 - | YNL024C   | -  | -1 | -1 |
| 0 - | YNL033W   | -  | -  | -1 |
| 0 - | YNL040W   | -  | -  | -1 |
| 0 - | YNL042W-B | -1 | -  | -  |
| 0 - | YNL046W   | -  | -1 | -  |
| 0 - | YNL054W-A | 1  | -  | -  |
| 0 - | YNL095C   | -  | -  | -1 |
| 0 - | YNL097C-B | -  | -  | -1 |
| 0 - | YNL108C   | -  | -  | -1 |
| 0 - | YNL122C   | -  | 1  | 1  |
| 0 - | YNL134C   | -  | -  | 1  |
| 0 - | YNL144C   | 1  | -  | 1  |
| 0 - | YNL162W-A | -  | -  | -1 |
| 0 - | YNL195C   | -  | 1  | -  |
| 0 - | YNL200C   | 1  | 1  | 1  |
| 0 - | YNL208W   | 1  | -  | 1  |
| 0 - | YNL217W   | -1 | -1 | -  |
| 0 - | YNL234W   | -  | -  | -1 |
| 0 - | YNL277W-A | -1 | 1  | 1  |
| 0 - | YNL284C-A | 1  | 1  | -1 |
| 0 - | YNL284C-B | 1  | 1  | 1  |
| 0 - | YNL339W-B | -  | -1 | -  |

|     |                |    |    |    |
|-----|----------------|----|----|----|
| 0 - | YNR014W        | -  | 1  | 1  |
| 0 - | YNR034W-A      | 1  | 1  | 1  |
| 0 - | YNR040W        | -  | 1  | 1  |
| 0 - | YNR048W        | -1 | -  | -  |
| 0 - | YNR061C        | -1 | -1 | -1 |
| 0 - | YNR062C        | -1 | -1 | -1 |
| 0 - | YNR065C        | 1  | -  | -  |
| 0 - | YOL013W-A      | -1 | -  | -  |
| 0 - | YOL014W        | -  | -1 | -1 |
| 0 - | YOL036W        | 1  | -  | -  |
| 0 - | YOL057W        | -  | -1 | -1 |
| 0 - | YOL092W        | -  | -  | -1 |
| 0 - | YOL103W-A      | 1  | -  | -  |
| 0 - | YOL103W-B      | 1  | -  | 1  |
| 0 - | YOL114C        | 1  | -  | 1  |
| 0 - | YOL159C        | -  | 1  | -  |
| 0 - | YOL159C-A      | -  | 1  | -  |
| 0 - | YOL163W        | 1  | -  | -  |
| 0 - | YOR012W        | 1  | -  | -  |
| 0 - | YOR020W-A      | 1  | -  | 1  |
| 0 - | YOR021C        | -1 | -1 | -1 |
| 0 - | YOR052C        | -  | 1  | 1  |
| 0 - | YOR059C        | 1  | -  | 1  |
| 0 - | YOR062C        | 1  | -  | -  |
| 0 - | YOR072W-B      | -1 | -  | -  |
| 0 - | YOR097C        | -  | -  | 1  |
| 0 - | YOR131C        | -1 | -  | -  |
| 0 - | YOR142W-A      | 1  | -  | -  |
| 0 - | YOR142W-B      | 1  | -  | 1  |
| 0 - | YOR152C        | 1  | 1  | 1  |
| 0 - | YOR186W        | -  | -  | 1  |
| 0 - | YOR192C-B      | 1  | -  | 1  |
| 0 - | YOR262W        | -  | -  | -1 |
| 0 - | YOR289W        | 1  | 1  | 1  |
| 0 - | YOR293C-A      | -1 | -  | -  |
| 0 - | YOR296W        | -1 | -  | 1  |
| 0 - | YOR302W        | 1  | 1  | -  |
| 0 - | YOR338W        | -  | 1  | -  |
| 0 - | YOR342C        | -1 | -  | -  |
| 0 - | YOR343W-B      | 1  | -  | 1  |
| 0 - | YOR378W        | -1 | -  | -  |
| 0 - | YOR389W        | 1  | 1  | 1  |
| 0 - | YOR394C-A      | 1  | -  | 1  |
| 0 - | YOR396C-A      | -  | -1 | -  |
| 0 - | YPL014W        | -  | -  | 1  |
| 0 - | YPL067C        | -  | 1  | -  |
| 1 - | <b>YPL068C</b> | -  | 1  | -1 |
| 0 - | YPL088W        | 1  | 1  | -  |
| 0 - | YPL107W        | -  | -1 | -1 |
| 0 - | YPL150W        | 1  | -  | -  |

|     |           |    |    |    |
|-----|-----------|----|----|----|
| 0 - | YPL162C   | -1 | -  | -1 |
| 0 - | YPL191C   | 1  | -  | -  |
| 0 - | YPL199C   | -1 | -1 | -1 |
| 0 - | YPL216W   | -  | -  | -1 |
| 0 - | YPL245W   | -1 | 1  | 1  |
| 0 - | YPL257W-A | 1  | -  | -  |
| 0 - | YPL257W-B | 1  | -  | 1  |
| 0 - | YPL264C   | -  | -  | 1  |
| 0 - | YPL272C   | 1  | -  | -  |
| 0 - | YPL277C   | 1  | -  | 1  |
| 0 - | YPL278C   | 1  | -  | 1  |
| 0 - | YPL283W-B | -  | -1 | -  |
| 0 - | YPR013C   | 1  | -  | -  |
| 0 - | YPR036W-A | 1  | 1  | 1  |
| 0 - | YPR098C   | -  | -  | 1  |
| 0 - | YPR117W   | 1  | 1  | 1  |
| 0 - | YPR127W   | 1  | 1  | 1  |
| 0 - | YPR137C-A | 1  | -  | -  |
| 0 - | YPR137C-B | 1  | -  | 1  |
| 0 - | YPR148C   | 1  | -  | -  |
| 0 - | YPR158C-C | 1  | -  | -  |
| 0 - | YPR158C-D | 1  | -  | 1  |
| 0 - | YPR158W-A | 1  | -  | -  |
| 0 - | YPR158W-B | 1  | -  | 1  |
| 0 - | YPR172W   | -  | 1  | -  |
| 0 - | YPR202W   | -  | -  | -1 |
| 0 - | YPR203W   | -  | -  | -1 |
| 0 - | YPR204C-A | -  | -1 | -  |
| 0 - | YPR204W   | -  | -1 | -1 |
